# Supplementary material for: Evolutionary insights into primate skeletal gene regulation using a comparative cell culture model
Source: PLoS Genet. 2022 Mar 9;18(3):e1010073. doi: 10.1371/journal.pgen.1010073 (PMC8936463; doi:10.1371/journal.pgen.1010073)
Supplement: S8 Table — (XLSX) [file pgen.1010073.s009.xlsx]

## Sheet: S8 Table
Sample	Sample_Details	Species	Species_Details	Abbr	Abbr_Details	Name	Name_Details	Name_Details_Gene	Cell_Type	Gene	Rep	qPCR_Sample_Name	qPCR_Name	qPCR_Date	qPCR_Researcher	CT	qPCR_Efficiency	Control_Ct_Mean_GAPDH_iPSC	EdeltadeltaCt_GAPDH_iPSC	Log10_EdeltadeltaCt_GAPDH_iPSC	Control_Ct_Mean_GAPDH_MSC	EdeltadeltaCt_GAPDH_MSC	Log10_EdeltadeltaCt_GAPDH_MSC	Control_Ct_Mean_GUSB_iPSC	EdeltadeltaCt_GUSB_iPSC	Log10_EdeltadeltaCt_GUSB_iPSC	Control_Ct_Mean_GUSB_MSC	EdeltadeltaCt_GUSB_MSC	Log10_EdeltadeltaCt_GUSB_MSC	Control_Ct_Mean_GAPDHandGUSB_iPSC	EdeltadeltaCt_GAPDHandGUSB_iPSC	Log10_EdeltadeltaCt_GAPDHandGUSB_iPSC	Control_Ct_Mean_GAPDHandGUSB_MSC	EdeltadeltaCt_GAPDHandGUSB_MSC	Log10_EdeltadeltaCt_GAPDHandGUSB_MSC
Sample	Sample iPSC	Human	Human iPSC	H1-r2	H1-r2 iPSC	H23555	H23555 iPSC	H23555 iPSC - GAPDH	iPSC	GAPDH		H1Ir2	study-collection-qPCR-H1r - plate1	2020-10-26	Emilie Briscoe	16.3321	1.98254	15.6946			15.409			15.6946			15.409			15.6946			15.409
Sample	Sample iPSC	Human	Human iPSC	H1-r2	H1-r2 iPSC	H23555	H23555 iPSC	H23555 iPSC - GAPDH	iPSC	GAPDH		H1Ir2	study-collection-qPCR-H1r - plate1	2020-10-26	Emilie Briscoe	15.6767	1.98254	15.6946			15.409			15.6946			15.409			15.6946			15.409
Sample	Sample iPSC	Human	Human iPSC	H1-r2	H1-r2 iPSC	H23555	H23555 iPSC	H23555 iPSC - GAPDH	iPSC	GAPDH		H1Ir2	study-collection-qPCR-H1r - plate1	2020-10-26	Emilie Briscoe	15.0751	1.98254	15.6946			15.409			15.6946			15.409			15.6946			15.409
Sample	Sample MSC	Human	Human MSC	H1-r2	H1-r2 MSC	H23555	H23555 MSC	H23555 MSC - GAPDH	MSC	GAPDH		H1Mr2	study-collection-qPCR-H1r - plate1	2020-10-26	Emilie Briscoe	16.3599	1.98254	15.6946			15.409			15.6946			15.409			15.6946			15.409
Sample	Sample MSC	Human	Human MSC	H1-r2	H1-r2 MSC	H23555	H23555 MSC	H23555 MSC - GAPDH	MSC	GAPDH		H1Mr2	study-collection-qPCR-H1r - plate1	2020-10-26	Emilie Briscoe	14.7908	1.98254	15.6946			15.409			15.6946			15.409			15.6946			15.409
Sample	Sample MSC	Human	Human MSC	H1-r2	H1-r2 MSC	H23555	H23555 MSC	H23555 MSC - GAPDH	MSC	GAPDH		H1Mr2	study-collection-qPCR-H1r - plate1	2020-10-26	Emilie Briscoe	15.0762	1.98254	15.6946			15.409			15.6946			15.409			15.6946			15.409
Sample	Sample Adipogenic	Human	Human Adipogenic	H1-r2	H1-r2 Adipogenic	H23555	H23555 Adipogenic	H23555 Adipogenic - GAPDH	Adipogenic	GAPDH		H1Ar2	study-collection-qPCR-H1r - plate1	2020-10-26	Emilie Briscoe	15.5167	1.98254	15.6946			15.409			15.6946			15.409			15.6946			15.409
Sample	Sample Adipogenic	Human	Human Adipogenic	H1-r2	H1-r2 Adipogenic	H23555	H23555 Adipogenic	H23555 Adipogenic - GAPDH	Adipogenic	GAPDH		H1Ar2	study-collection-qPCR-H1r - plate1	2020-10-26	Emilie Briscoe	14.8626	1.98254	15.6946			15.409			15.6946			15.409			15.6946			15.409
Sample	Sample Adipogenic	Human	Human Adipogenic	H1-r2	H1-r2 Adipogenic	H23555	H23555 Adipogenic	H23555 Adipogenic - GAPDH	Adipogenic	GAPDH		H1Ar2	study-collection-qPCR-H1r - plate1	2020-10-26	Emilie Briscoe	14.7081	1.98254	15.6946			15.409			15.6946			15.409			15.6946			15.409
Sample	Sample Chondrogenic	Human	Human Chondrogenic	H1-r2	H1-r2 Chondrogenic	H23555	H23555 Chondrogenic	H23555 Chondrogenic - GAPDH	Chondrogenic	GAPDH		H1Cr2	study-collection-qPCR-H1r - plate1	2020-10-26	Emilie Briscoe	23.4147	1.98254	15.6946			15.409			15.6946			15.409			15.6946			15.409
Sample	Sample Chondrogenic	Human	Human Chondrogenic	H1-r2	H1-r2 Chondrogenic	H23555	H23555 Chondrogenic	H23555 Chondrogenic - GAPDH	Chondrogenic	GAPDH		H1Cr2	study-collection-qPCR-H1r - plate1	2020-10-26	Emilie Briscoe	24.6515	1.98254	15.6946			15.409			15.6946			15.409			15.6946			15.409
Sample	Sample Chondrogenic	Human	Human Chondrogenic	H1-r2	H1-r2 Chondrogenic	H23555	H23555 Chondrogenic	H23555 Chondrogenic - GAPDH	Chondrogenic	GAPDH		H1Cr2	study-collection-qPCR-H1r - plate1	2020-10-26	Emilie Briscoe	24.8483	1.98254	15.6946			15.409			15.6946			15.409			15.6946			15.409
Sample	Sample Osteogenic	Human	Human Osteogenic	H1-r2	H1-r2 Osteogenic	H23555	H23555 Osteogenic	H23555 Osteogenic - GAPDH	Osteogenic	GAPDH		H1Or2	study-collection-qPCR-H1r - plate1	2020-10-26	Emilie Briscoe	16.5677	1.98254	15.6946			15.409			15.6946			15.409			15.6946			15.409
Sample	Sample Osteogenic	Human	Human Osteogenic	H1-r2	H1-r2 Osteogenic	H23555	H23555 Osteogenic	H23555 Osteogenic - GAPDH	Osteogenic	GAPDH		H1Or2	study-collection-qPCR-H1r - plate1	2020-10-26	Emilie Briscoe	15.8008	1.98254	15.6946			15.409			15.6946			15.409			15.6946			15.409
Sample	Sample Osteogenic	Human	Human Osteogenic	H1-r2	H1-r2 Osteogenic	H23555	H23555 Osteogenic	H23555 Osteogenic - GAPDH	Osteogenic	GAPDH		H1Or2	study-collection-qPCR-H1r - plate1	2020-10-26	Emilie Briscoe	15.873	1.98254	15.6946			15.409			15.6946			15.409			15.6946			15.409
Sample	Sample iPSC	Human	Human iPSC	H1-r2	H1-r2 iPSC	H23555	H23555 iPSC	H23555 iPSC - GAPDH	iPSC	GAPDH		H1Ir2	study-collection-qPCR-H1r - plate1	2020-10-26	Emilie Briscoe	17.2508	1.93474	16.6323			15.9625			16.6323			15.9625			16.6323			15.9625
Sample	Sample iPSC	Human	Human iPSC	H1-r2	H1-r2 iPSC	H23555	H23555 iPSC	H23555 iPSC - GAPDH	iPSC	GAPDH		H1Ir2	study-collection-qPCR-H1r - plate2	2020-10-28	Emilie Briscoe	16.5917	1.93474	16.6323			15.9625			16.6323			15.9625			16.6323			15.9625
Sample	Sample iPSC	Human	Human iPSC	H1-r2	H1-r2 iPSC	H23555	H23555 iPSC	H23555 iPSC - GAPDH	iPSC	GAPDH		H1Ir2	study-collection-qPCR-H1r - plate2	2020-10-28	Emilie Briscoe	16.0544	1.93474	16.6323			15.9625			16.6323			15.9625			16.6323			15.9625
Sample	Sample MSC	Human	Human MSC	H1-r2	H1-r2 MSC	H23555	H23555 MSC	H23555 MSC - GAPDH	MSC	GAPDH		H1Mr2	study-collection-qPCR-H1r - plate2	2020-10-28	Emilie Briscoe	17.2147	1.93474	16.6323			15.9625			16.6323			15.9625			16.6323			15.9625
Sample	Sample MSC	Human	Human MSC	H1-r2	H1-r2 MSC	H23555	H23555 MSC	H23555 MSC - GAPDH	MSC	GAPDH		H1Mr2	study-collection-qPCR-H1r - plate2	2020-10-28	Emilie Briscoe	15.419	1.93474	16.6323			15.9625			16.6323			15.9625			16.6323			15.9625
Sample	Sample MSC	Human	Human MSC	H1-r2	H1-r2 MSC	H23555	H23555 MSC	H23555 MSC - GAPDH	MSC	GAPDH		H1Mr2	study-collection-qPCR-H1r - plate2	2020-10-28	Emilie Briscoe	15.2538	1.93474	16.6323			15.9625			16.6323			15.9625			16.6323			15.9625
Sample	Sample Adipogenic	Human	Human Adipogenic	H1-r2	H1-r2 Adipogenic	H23555	H23555 Adipogenic	H23555 Adipogenic - GAPDH	Adipogenic	GAPDH		H1Ar2	study-collection-qPCR-H1r - plate2	2020-10-28	Emilie Briscoe	17.2933	1.93474	16.6323			15.9625			16.6323			15.9625			16.6323			15.9625
Sample	Sample Adipogenic	Human	Human Adipogenic	H1-r2	H1-r2 Adipogenic	H23555	H23555 Adipogenic	H23555 Adipogenic - GAPDH	Adipogenic	GAPDH		H1Ar2	study-collection-qPCR-H1r - plate2	2020-10-28	Emilie Briscoe	14.9669	1.93474	16.6323			15.9625			16.6323			15.9625			16.6323			15.9625
Sample	Sample Adipogenic	Human	Human Adipogenic	H1-r2	H1-r2 Adipogenic	H23555	H23555 Adipogenic	H23555 Adipogenic - GAPDH	Adipogenic	GAPDH		H1Ar2	study-collection-qPCR-H1r - plate2	2020-10-28	Emilie Briscoe	15.2039	1.93474	16.6323			15.9625			16.6323			15.9625			16.6323			15.9625
Sample	Sample Chondrogenic	Human	Human Chondrogenic	H1-r2	H1-r2 Chondrogenic	H23555	H23555 Chondrogenic	H23555 Chondrogenic - GAPDH	Chondrogenic	GAPDH		H1Cr2	study-collection-qPCR-H1r - plate2	2020-10-28	Emilie Briscoe	24.0847	1.93474	16.6323			15.9625			16.6323			15.9625			16.6323			15.9625
Sample	Sample Chondrogenic	Human	Human Chondrogenic	H1-r2	H1-r2 Chondrogenic	H23555	H23555 Chondrogenic	H23555 Chondrogenic - GAPDH	Chondrogenic	GAPDH		H1Cr2	study-collection-qPCR-H1r - plate2	2020-10-28	Emilie Briscoe	24.4944	1.93474	16.6323			15.9625			16.6323			15.9625			16.6323			15.9625
Sample	Sample Chondrogenic	Human	Human Chondrogenic	H1-r2	H1-r2 Chondrogenic	H23555	H23555 Chondrogenic	H23555 Chondrogenic - GAPDH	Chondrogenic	GAPDH		H1Cr2	study-collection-qPCR-H1r - plate2	2020-10-28	Emilie Briscoe	25.3343	1.93474	16.6323			15.9625			16.6323			15.9625			16.6323			15.9625
Sample	Sample Osteogenic	Human	Human Osteogenic	H1-r2	H1-r2 Osteogenic	H23555	H23555 Osteogenic	H23555 Osteogenic - GAPDH	Osteogenic	GAPDH		H1Or2	study-collection-qPCR-H1r - plate2	2020-10-28	Emilie Briscoe	17.6616	1.93474	16.6323			15.9625			16.6323			15.9625			16.6323			15.9625
Sample	Sample Osteogenic	Human	Human Osteogenic	H1-r2	H1-r2 Osteogenic	H23555	H23555 Osteogenic	H23555 Osteogenic - GAPDH	Osteogenic	GAPDH		H1Or2	study-collection-qPCR-H1r - plate2	2020-10-28	Emilie Briscoe	17.3925	1.93474	16.6323			15.9625			16.6323			15.9625			16.6323			15.9625
Sample	Sample Osteogenic	Human	Human Osteogenic	H1-r2	H1-r2 Osteogenic	H23555	H23555 Osteogenic	H23555 Osteogenic - GAPDH	Osteogenic	GAPDH		H1Or2	study-collection-qPCR-H1r - plate2	2020-10-28	Emilie Briscoe	16.8731	1.93474	16.6323			15.9625			16.6323			15.9625			16.6323			15.9625
Sample	Sample iPSC	Human	Human iPSC	H2	H2 iPSC	H20157	H20157 iPSC	H20157 iPSC - GAPDH	iPSC	GAPDH	1	H2I2	study-collection-qPCR-H2 - plate1	2020-07-28	Emilie Briscoe	15.2812	2.02708	14.99			13.0082			14.99			13.0082			14.99			13.0082
Sample	Sample iPSC	Human	Human iPSC	H2	H2 iPSC	H20157	H20157 iPSC	H20157 iPSC - GAPDH	iPSC	GAPDH	2	H2I2	study-collection-qPCR-H2 - plate1	2020-07-28	Emilie Briscoe	14.6968	2.02708	14.99			13.0082			14.99			13.0082			14.99			13.0082
Sample	Sample iPSC	Human	Human iPSC	H2	H2 iPSC	H20157	H20157 iPSC	H20157 iPSC - GAPDH	iPSC	GAPDH	3	H2I2	study-collection-qPCR-H2 - plate1	2020-07-28	Emilie Briscoe	14.9921	2.02708	14.99			13.0082			14.99			13.0082			14.99			13.0082
Sample	Sample MSC	Human	Human MSC	H2	H2 MSC	H20157	H20157 MSC	H20157 MSC - GAPDH	MSC	GAPDH	1	H2M2	study-collection-qPCR-H2 - plate1	2020-07-28	Emilie Briscoe	13.3772	2.02708	14.99			13.0082			14.99			13.0082			14.99			13.0082
Sample	Sample MSC	Human	Human MSC	H2	H2 MSC	H20157	H20157 MSC	H20157 MSC - GAPDH	MSC	GAPDH	2	H2M2	study-collection-qPCR-H2 - plate1	2020-07-28	Emilie Briscoe	12.6424	2.02708	14.99			13.0082			14.99			13.0082			14.99			13.0082
Sample	Sample MSC	Human	Human MSC	H2	H2 MSC	H20157	H20157 MSC	H20157 MSC - GAPDH	MSC	GAPDH	3	H2M2	study-collection-qPCR-H2 - plate1	2020-07-28	Emilie Briscoe	13.0049	2.02708	14.99			13.0082			14.99			13.0082			14.99			13.0082
Sample	Sample Adipogenic	Human	Human Adipogenic	H2	H2 Adipogenic	H20157	H20157 Adipogenic	H20157 Adipogenic - GAPDH	Adipogenic	GAPDH	1	H2A2	study-collection-qPCR-H2 - plate1	2020-07-28	Emilie Briscoe	14.6041	2.02708	14.99			13.0082			14.99			13.0082			14.99			13.0082
Sample	Sample Adipogenic	Human	Human Adipogenic	H2	H2 Adipogenic	H20157	H20157 Adipogenic	H20157 Adipogenic - GAPDH	Adipogenic	GAPDH	2	H2A2	study-collection-qPCR-H2 - plate1	2020-07-28	Emilie Briscoe	14.5125	2.02708	14.99			13.0082			14.99			13.0082			14.99			13.0082
Sample	Sample Adipogenic	Human	Human Adipogenic	H2	H2 Adipogenic	H20157	H20157 Adipogenic	H20157 Adipogenic - GAPDH	Adipogenic	GAPDH	3	H2A2	study-collection-qPCR-H2 - plate1	2020-07-28	Emilie Briscoe	14.7532	2.02708	14.99			13.0082			14.99			13.0082			14.99			13.0082
Sample	Sample Chondrogenic	Human	Human Chondrogenic	H2	H2 Chondrogenic	H20157	H20157 Chondrogenic	H20157 Chondrogenic - GAPDH	Chondrogenic	GAPDH	1	H2C2	study-collection-qPCR-H2 - plate1	2020-07-28	Emilie Briscoe	18.8238	2.02708	14.99			13.0082			14.99			13.0082			14.99			13.0082
Sample	Sample Chondrogenic	Human	Human Chondrogenic	H2	H2 Chondrogenic	H20157	H20157 Chondrogenic	H20157 Chondrogenic - GAPDH	Chondrogenic	GAPDH	2	H2C2	study-collection-qPCR-H2 - plate1	2020-07-28	Emilie Briscoe	18.9029	2.02708	14.99			13.0082			14.99			13.0082			14.99			13.0082
Sample	Sample Chondrogenic	Human	Human Chondrogenic	H2	H2 Chondrogenic	H20157	H20157 Chondrogenic	H20157 Chondrogenic - GAPDH	Chondrogenic	GAPDH	3	H2C2	study-collection-qPCR-H2 - plate1	2020-07-28	Emilie Briscoe	18.9764	2.02708	14.99			13.0082			14.99			13.0082			14.99			13.0082
Sample	Sample Osteogenic	Human	Human Osteogenic	H2	H2 Osteogenic	H20157	H20157 Osteogenic	H20157 Osteogenic - GAPDH	Osteogenic	GAPDH	1	H2O2	study-collection-qPCR-H2 - plate1	2020-07-28	Emilie Briscoe	16.9632	2.02708	14.99			13.0082			14.99			13.0082			14.99			13.0082
Sample	Sample Osteogenic	Human	Human Osteogenic	H2	H2 Osteogenic	H20157	H20157 Osteogenic	H20157 Osteogenic - GAPDH	Osteogenic	GAPDH	2	H2O2	study-collection-qPCR-H2 - plate1	2020-07-28	Emilie Briscoe	14.8676	2.02708	14.99			13.0082			14.99			13.0082			14.99			13.0082
Sample	Sample Osteogenic	Human	Human Osteogenic	H2	H2 Osteogenic	H20157	H20157 Osteogenic	H20157 Osteogenic - GAPDH	Osteogenic	GAPDH	3	H2O2	study-collection-qPCR-H2 - plate1	2020-07-28	Emilie Briscoe	15.3122	2.02708	14.99			13.0082			14.99			13.0082			14.99			13.0082
Sample	Sample iPSC	Human	Human iPSC	H2	H2 iPSC	H20157	H20157 iPSC	H20157 iPSC - GAPDH	iPSC	GAPDH	1	H2I2	study-collection-qPCR-H2 - plate2	2020-07-30	Emilie Briscoe	16.5582	2.00991	15.8572			15.4175			15.8572			15.4175			15.8572			15.4175
Sample	Sample iPSC	Human	Human iPSC	H2	H2 iPSC	H20157	H20157 iPSC	H20157 iPSC - GAPDH	iPSC	GAPDH	2	H2I2	study-collection-qPCR-H2 - plate2	2020-07-30	Emilie Briscoe	15.4038	2.00991	15.8572			15.4175			15.8572			15.4175			15.8572			15.4175
Sample	Sample iPSC	Human	Human iPSC	H2	H2 iPSC	H20157	H20157 iPSC	H20157 iPSC - GAPDH	iPSC	GAPDH	3	H2I2	study-collection-qPCR-H2 - plate2	2020-07-30	Emilie Briscoe	15.6096	2.00991	15.8572			15.4175			15.8572			15.4175			15.8572			15.4175
Sample	Sample MSC	Human	Human MSC	H2	H2 MSC	H20157	H20157 MSC	H20157 MSC - GAPDH	MSC	GAPDH	1	H2M2	study-collection-qPCR-H2 - plate2	2020-07-30	Emilie Briscoe	15.45	2.00991	15.8572			15.4175			15.8572			15.4175			15.8572			15.4175
Sample	Sample MSC	Human	Human MSC	H2	H2 MSC	H20157	H20157 MSC	H20157 MSC - GAPDH	MSC	GAPDH	2	H2M2	study-collection-qPCR-H2 - plate2	2020-07-30	Emilie Briscoe	15.3623	2.00991	15.8572			15.4175			15.8572			15.4175			15.8572			15.4175
Sample	Sample MSC	Human	Human MSC	H2	H2 MSC	H20157	H20157 MSC	H20157 MSC - GAPDH	MSC	GAPDH	3	H2M2	study-collection-qPCR-H2 - plate2	2020-07-30	Emilie Briscoe	15.4401	2.00991	15.8572			15.4175			15.8572			15.4175			15.8572			15.4175
Sample	Sample Adipogenic	Human	Human Adipogenic	H2	H2 Adipogenic	H20157	H20157 Adipogenic	H20157 Adipogenic - GAPDH	Adipogenic	GAPDH	1	H2A2	study-collection-qPCR-H2 - plate2	2020-07-30	Emilie Briscoe	16.2401	2.00991	15.8572			15.4175			15.8572			15.4175			15.8572			15.4175
Sample	Sample Adipogenic	Human	Human Adipogenic	H2	H2 Adipogenic	H20157	H20157 Adipogenic	H20157 Adipogenic - GAPDH	Adipogenic	GAPDH	2	H2A2	study-collection-qPCR-H2 - plate2	2020-07-30	Emilie Briscoe	15.9992	2.00991	15.8572			15.4175			15.8572			15.4175			15.8572			15.4175
Sample	Sample Adipogenic	Human	Human Adipogenic	H2	H2 Adipogenic	H20157	H20157 Adipogenic	H20157 Adipogenic - GAPDH	Adipogenic	GAPDH	3	H2A2	study-collection-qPCR-H2 - plate2	2020-07-30	Emilie Briscoe	16.3305	2.00991	15.8572			15.4175			15.8572			15.4175			15.8572			15.4175
Sample	Sample Chondrogenic	Human	Human Chondrogenic	H2	H2 Chondrogenic	H20157	H20157 Chondrogenic	H20157 Chondrogenic - GAPDH	Chondrogenic	GAPDH	1	H2C2	study-collection-qPCR-H2 - plate2	2020-07-30	Emilie Briscoe	20.4449	2.00991	15.8572			15.4175			15.8572			15.4175			15.8572			15.4175
Sample	Sample Chondrogenic	Human	Human Chondrogenic	H2	H2 Chondrogenic	H20157	H20157 Chondrogenic	H20157 Chondrogenic - GAPDH	Chondrogenic	GAPDH	2	H2C2	study-collection-qPCR-H2 - plate2	2020-07-30	Emilie Briscoe	19.6943	2.00991	15.8572			15.4175			15.8572			15.4175			15.8572			15.4175
Sample	Sample Chondrogenic	Human	Human Chondrogenic	H2	H2 Chondrogenic	H20157	H20157 Chondrogenic	H20157 Chondrogenic - GAPDH	Chondrogenic	GAPDH	3	H2C2	study-collection-qPCR-H2 - plate2	2020-07-30	Emilie Briscoe	19.7474	2.00991	15.8572			15.4175			15.8572			15.4175			15.8572			15.4175
Sample	Sample Osteogenic	Human	Human Osteogenic	H2	H2 Osteogenic	H20157	H20157 Osteogenic	H20157 Osteogenic - GAPDH	Osteogenic	GAPDH	1	H2O2	study-collection-qPCR-H2 - plate2	2020-07-30	Emilie Briscoe	18.3066	2.00991	15.8572			15.4175			15.8572			15.4175			15.8572			15.4175
Sample	Sample Osteogenic	Human	Human Osteogenic	H2	H2 Osteogenic	H20157	H20157 Osteogenic	H20157 Osteogenic - GAPDH	Osteogenic	GAPDH	2	H2O2	study-collection-qPCR-H2 - plate2	2020-07-30	Emilie Briscoe	16.8155	2.00991	15.8572			15.4175			15.8572			15.4175			15.8572			15.4175
Sample	Sample Osteogenic	Human	Human Osteogenic	H2	H2 Osteogenic	H20157	H20157 Osteogenic	H20157 Osteogenic - GAPDH	Osteogenic	GAPDH	3	H2O2	study-collection-qPCR-H2 - plate2	2020-07-30	Emilie Briscoe	16.846	2.00991	15.8572			15.4175			15.8572			15.4175			15.8572			15.4175
Sample	Sample iPSC	Human	Human iPSC	H3	H3 iPSC	H28126	H28126 iPSC	H28126 iPSC - GAPDH	iPSC	GAPDH	1	H3I2	study-collection-qPCR-H3 - plate1	2020-08-26	Emilie Briscoe	16.9082	2.18467	16.3659			16.3273			16.3659			16.3273			16.3659			16.3273
Sample	Sample iPSC	Human	Human iPSC	H3	H3 iPSC	H28126	H28126 iPSC	H28126 iPSC - GAPDH	iPSC	GAPDH	2	H3I2	study-collection-qPCR-H3 - plate1	2020-08-26	Emilie Briscoe	16.1583	2.18467	16.3659			16.3273			16.3659			16.3273			16.3659			16.3273
Sample	Sample iPSC	Human	Human iPSC	H3	H3 iPSC	H28126	H28126 iPSC	H28126 iPSC - GAPDH	iPSC	GAPDH	3	H3I2	study-collection-qPCR-H3 - plate1	2020-08-26	Emilie Briscoe	16.031	2.18467	16.3659			16.3273			16.3659			16.3273			16.3659			16.3273
Sample	Sample MSC	Human	Human MSC	H3	H3 MSC	H28126	H28126 MSC	H28126 MSC - GAPDH	MSC	GAPDH	1	H3M1	study-collection-qPCR-H3 - plate1	2020-08-26	Emilie Briscoe	17.0306	2.18467	16.3659			16.3273			16.3659			16.3273			16.3659			16.3273
Sample	Sample MSC	Human	Human MSC	H3	H3 MSC	H28126	H28126 MSC	H28126 MSC - GAPDH	MSC	GAPDH	2	H3M1	study-collection-qPCR-H3 - plate1	2020-08-26	Emilie Briscoe	16.1701	2.18467	16.3659			16.3273			16.3659			16.3273			16.3659			16.3273
Sample	Sample MSC	Human	Human MSC	H3	H3 MSC	H28126	H28126 MSC	H28126 MSC - GAPDH	MSC	GAPDH	3	H3M1	study-collection-qPCR-H3 - plate1	2020-08-26	Emilie Briscoe	15.7811	2.18467	16.3659			16.3273			16.3659			16.3273			16.3659			16.3273
Sample	Sample Adipogenic	Human	Human Adipogenic	H3	H3 Adipogenic	H28126	H28126 Adipogenic	H28126 Adipogenic - GAPDH	Adipogenic	GAPDH	1	H3A1	study-collection-qPCR-H3 - plate1	2020-08-26	Emilie Briscoe	17.9758	2.18467	16.3659			16.3273			16.3659			16.3273			16.3659			16.3273
Sample	Sample Adipogenic	Human	Human Adipogenic	H3	H3 Adipogenic	H28126	H28126 Adipogenic	H28126 Adipogenic - GAPDH	Adipogenic	GAPDH	2	H3A1	study-collection-qPCR-H3 - plate1	2020-08-26	Emilie Briscoe	16.5101	2.18467	16.3659			16.3273			16.3659			16.3273			16.3659			16.3273
Sample	Sample Adipogenic	Human	Human Adipogenic	H3	H3 Adipogenic	H28126	H28126 Adipogenic	H28126 Adipogenic - GAPDH	Adipogenic	GAPDH	3	H3A1	study-collection-qPCR-H3 - plate1	2020-08-26	Emilie Briscoe	16.1258	2.18467	16.3659			16.3273			16.3659			16.3273			16.3659			16.3273
Sample	Sample Osteogenic	Human	Human Osteogenic	H3	H3 Osteogenic	H28126	H28126 Osteogenic	H28126 Osteogenic - GAPDH	Osteogenic	GAPDH	1	H3O2	study-collection-qPCR-H3 - plate1	2020-08-26	Emilie Briscoe	16.9398	2.18467	16.3659			16.3273			16.3659			16.3273			16.3659			16.3273
Sample	Sample Osteogenic	Human	Human Osteogenic	H3	H3 Osteogenic	H28126	H28126 Osteogenic	H28126 Osteogenic - GAPDH	Osteogenic	GAPDH	2	H3O2	study-collection-qPCR-H3 - plate1	2020-08-26	Emilie Briscoe	16.0652	2.18467	16.3659			16.3273			16.3659			16.3273			16.3659			16.3273
Sample	Sample Osteogenic	Human	Human Osteogenic	H3	H3 Osteogenic	H28126	H28126 Osteogenic	H28126 Osteogenic - GAPDH	Osteogenic	GAPDH	3	H3O2	study-collection-qPCR-H3 - plate1	2020-08-26	Emilie Briscoe	15.4311	2.18467	16.3659			16.3273			16.3659			16.3273			16.3659			16.3273
Sample	Sample iPSC	Human	Human iPSC	H3	H3 iPSC	H28126	H28126 iPSC	H28126 iPSC - GAPDH	iPSC	GAPDH	1	H3I2	study-collection-qPCR-H3 - plate2	2020-08-28	Emilie Briscoe	16.7512	2.15675	16.6597			16.7099			16.6597			16.7099			16.6597			16.7099
Sample	Sample iPSC	Human	Human iPSC	H3	H3 iPSC	H28126	H28126 iPSC	H28126 iPSC - GAPDH	iPSC	GAPDH	2	H3I2	study-collection-qPCR-H3 - plate2	2020-08-28	Emilie Briscoe	16.6314	2.15675	16.6597			16.7099			16.6597			16.7099			16.6597			16.7099
Sample	Sample iPSC	Human	Human iPSC	H3	H3 iPSC	H28126	H28126 iPSC	H28126 iPSC - GAPDH	iPSC	GAPDH	3	H3I2	study-collection-qPCR-H3 - plate2	2020-08-28	Emilie Briscoe	16.5965	2.15675	16.6597			16.7099			16.6597			16.7099			16.6597			16.7099
Sample	Sample MSC	Human	Human MSC	H3	H3 MSC	H28126	H28126 MSC	H28126 MSC - GAPDH	MSC	GAPDH	1	H3M1	study-collection-qPCR-H3 - plate2	2020-08-28	Emilie Briscoe	17.2847	2.15675	16.6597			16.7099			16.6597			16.7099			16.6597			16.7099
Sample	Sample MSC	Human	Human MSC	H3	H3 MSC	H28126	H28126 MSC	H28126 MSC - GAPDH	MSC	GAPDH	2	H3M1	study-collection-qPCR-H3 - plate2	2020-08-28	Emilie Briscoe	16.6667	2.15675	16.6597			16.7099			16.6597			16.7099			16.6597			16.7099
Sample	Sample MSC	Human	Human MSC	H3	H3 MSC	H28126	H28126 MSC	H28126 MSC - GAPDH	MSC	GAPDH	3	H3M1	study-collection-qPCR-H3 - plate2	2020-08-28	Emilie Briscoe	16.1782	2.15675	16.6597			16.7099			16.6597			16.7099			16.6597			16.7099
Sample	Sample Adipogenic	Human	Human Adipogenic	H3	H3 Adipogenic	H28126	H28126 Adipogenic	H28126 Adipogenic - GAPDH	Adipogenic	GAPDH	1	H3A1	study-collection-qPCR-H3 - plate2	2020-08-28	Emilie Briscoe	17.5008	2.15675	16.6597			16.7099			16.6597			16.7099			16.6597			16.7099
Sample	Sample Adipogenic	Human	Human Adipogenic	H3	H3 Adipogenic	H28126	H28126 Adipogenic	H28126 Adipogenic - GAPDH	Adipogenic	GAPDH	2	H3A1	study-collection-qPCR-H3 - plate2	2020-08-28	Emilie Briscoe	16.8183	2.15675	16.6597			16.7099			16.6597			16.7099			16.6597			16.7099
Sample	Sample Adipogenic	Human	Human Adipogenic	H3	H3 Adipogenic	H28126	H28126 Adipogenic	H28126 Adipogenic - GAPDH	Adipogenic	GAPDH	3	H3A1	study-collection-qPCR-H3 - plate2	2020-08-28	Emilie Briscoe	16.5899	2.15675	16.6597			16.7099			16.6597			16.7099			16.6597			16.7099
Sample	Sample Osteogenic	Human	Human Osteogenic	H3	H3 Osteogenic	H28126	H28126 Osteogenic	H28126 Osteogenic - GAPDH	Osteogenic	GAPDH	1	H3O2	study-collection-qPCR-H3 - plate2	2020-08-28	Emilie Briscoe	16.9657	2.15675	16.6597			16.7099			16.6597			16.7099			16.6597			16.7099
Sample	Sample Osteogenic	Human	Human Osteogenic	H3	H3 Osteogenic	H28126	H28126 Osteogenic	H28126 Osteogenic - GAPDH	Osteogenic	GAPDH	2	H3O2	study-collection-qPCR-H3 - plate2	2020-08-28	Emilie Briscoe	16.0253	2.15675	16.6597			16.7099			16.6597			16.7099			16.6597			16.7099
Sample	Sample Osteogenic	Human	Human Osteogenic	H3	H3 Osteogenic	H28126	H28126 Osteogenic	H28126 Osteogenic - GAPDH	Osteogenic	GAPDH	3	H3O2	study-collection-qPCR-H3 - plate2	2020-08-28	Emilie Briscoe	15.7722	2.15675	16.6597			16.7099			16.6597			16.7099			16.6597			16.7099
Sample	Sample iPSC	Human	Human iPSC	H4	H4 iPSC	H28834	H28834 iPSC	H28834 iPSC - GAPDH	iPSC	GAPDH	1	H4I2	study-collection-qPCR-H4 - plate1	2020-09-11	Emilie Briscoe	15.2033	2.1094	14.4842			14.7072			14.4842			14.7072			14.4842			14.7072
Sample	Sample iPSC	Human	Human iPSC	H4	H4 iPSC	H28834	H28834 iPSC	H28834 iPSC - GAPDH	iPSC	GAPDH	2	H4I2	study-collection-qPCR-H4 - plate1	2020-09-11	Emilie Briscoe	14.163	2.1094	14.4842			14.7072			14.4842			14.7072			14.4842			14.7072
Sample	Sample iPSC	Human	Human iPSC	H4	H4 iPSC	H28834	H28834 iPSC	H28834 iPSC - GAPDH	iPSC	GAPDH	3	H4I2	study-collection-qPCR-H4 - plate1	2020-09-11	Emilie Briscoe	14.0863	2.1094	14.4842			14.7072			14.4842			14.7072			14.4842			14.7072
Sample	Sample MSC	Human	Human MSC	H4	H4 MSC	H28834	H28834 MSC	H28834 MSC - GAPDH	MSC	GAPDH	1	H4M2	study-collection-qPCR-H4 - plate1	2020-09-11	Emilie Briscoe	14.8456	2.1094	14.4842			14.7072			14.4842			14.7072			14.4842			14.7072
Sample	Sample MSC	Human	Human MSC	H4	H4 MSC	H28834	H28834 MSC	H28834 MSC - GAPDH	MSC	GAPDH	2	H4M2	study-collection-qPCR-H4 - plate1	2020-09-11	Emilie Briscoe	14.7406	2.1094	14.4842			14.7072			14.4842			14.7072			14.4842			14.7072
Sample	Sample MSC	Human	Human MSC	H4	H4 MSC	H28834	H28834 MSC	H28834 MSC - GAPDH	MSC	GAPDH	3	H4M2	study-collection-qPCR-H4 - plate1	2020-09-11	Emilie Briscoe	14.5353	2.1094	14.4842			14.7072			14.4842			14.7072			14.4842			14.7072
Sample	Sample Adipogenic	Human	Human Adipogenic	H4	H4 Adipogenic	H28834	H28834 Adipogenic	H28834 Adipogenic - GAPDH	Adipogenic	GAPDH	1	H4A2	study-collection-qPCR-H4 - plate1	2020-09-11	Emilie Briscoe	16.3709	2.1094	14.4842			14.7072			14.4842			14.7072			14.4842			14.7072
Sample	Sample Adipogenic	Human	Human Adipogenic	H4	H4 Adipogenic	H28834	H28834 Adipogenic	H28834 Adipogenic - GAPDH	Adipogenic	GAPDH	2	H4A2	study-collection-qPCR-H4 - plate1	2020-09-11	Emilie Briscoe	15.5299	2.1094	14.4842			14.7072			14.4842			14.7072			14.4842			14.7072
Sample	Sample Adipogenic	Human	Human Adipogenic	H4	H4 Adipogenic	H28834	H28834 Adipogenic	H28834 Adipogenic - GAPDH	Adipogenic	GAPDH	3	H4A2	study-collection-qPCR-H4 - plate1	2020-09-11	Emilie Briscoe	15.2733	2.1094	14.4842			14.7072			14.4842			14.7072			14.4842			14.7072
Sample	Sample Chondrogenic	Human	Human Chondrogenic	H4	H4 Chondrogenic	H28834	H28834 Chondrogenic	H28834 Chondrogenic - GAPDH	Chondrogenic	GAPDH	1	H4C2	study-collection-qPCR-H4 - plate1	2020-09-11	Emilie Briscoe	17.0449	2.1094	14.4842			14.7072			14.4842			14.7072			14.4842			14.7072
Sample	Sample Chondrogenic	Human	Human Chondrogenic	H4	H4 Chondrogenic	H28834	H28834 Chondrogenic	H28834 Chondrogenic - GAPDH	Chondrogenic	GAPDH	2	H4C2	study-collection-qPCR-H4 - plate1	2020-09-11	Emilie Briscoe	16.4947	2.1094	14.4842			14.7072			14.4842			14.7072			14.4842			14.7072
Sample	Sample Chondrogenic	Human	Human Chondrogenic	H4	H4 Chondrogenic	H28834	H28834 Chondrogenic	H28834 Chondrogenic - GAPDH	Chondrogenic	GAPDH	3	H4C2	study-collection-qPCR-H4 - plate1	2020-09-11	Emilie Briscoe	16.3993	2.1094	14.4842			14.7072			14.4842			14.7072			14.4842			14.7072
Sample	Sample Osteogenic	Human	Human Osteogenic	H4	H4 Osteogenic	H28834	H28834 Osteogenic	H28834 Osteogenic - GAPDH	Osteogenic	GAPDH	1	H4O2	study-collection-qPCR-H4 - plate1	2020-09-11	Emilie Briscoe	16.9757	2.1094	14.4842			14.7072			14.4842			14.7072			14.4842			14.7072
Sample	Sample Osteogenic	Human	Human Osteogenic	H4	H4 Osteogenic	H28834	H28834 Osteogenic	H28834 Osteogenic - GAPDH	Osteogenic	GAPDH	2	H4O2	study-collection-qPCR-H4 - plate1	2020-09-11	Emilie Briscoe	16.3995	2.1094	14.4842			14.7072			14.4842			14.7072			14.4842			14.7072
Sample	Sample Osteogenic	Human	Human Osteogenic	H4	H4 Osteogenic	H28834	H28834 Osteogenic	H28834 Osteogenic - GAPDH	Osteogenic	GAPDH	3	H4O2	study-collection-qPCR-H4 - plate1	2020-09-11	Emilie Briscoe	16.0882	2.1094	14.4842			14.7072			14.4842			14.7072			14.4842			14.7072
Sample	Sample iPSC	Human	Human iPSC	H4	H4 iPSC	H28834	H28834 iPSC	H28834 iPSC - GAPDH	iPSC	GAPDH	1	H4I2	study-collection-qPCR-H4 - plate2	2020-09-15	Emilie Briscoe	15.2481	2.09663	15.1354			15.4177			15.1354			15.4177			15.1354			15.4177
Sample	Sample iPSC	Human	Human iPSC	H4	H4 iPSC	H28834	H28834 iPSC	H28834 iPSC - GAPDH	iPSC	GAPDH	2	H4I2	study-collection-qPCR-H4 - plate2	2020-09-15	Emilie Briscoe	14.8132	2.09663	15.1354			15.4177			15.1354			15.4177			15.1354			15.4177
Sample	Sample iPSC	Human	Human iPSC	H4	H4 iPSC	H28834	H28834 iPSC	H28834 iPSC - GAPDH	iPSC	GAPDH	3	H4I2	study-collection-qPCR-H4 - plate2	2020-09-15	Emilie Briscoe	15.3449	2.09663	15.1354			15.4177			15.1354			15.4177			15.1354			15.4177
Sample	Sample MSC	Human	Human MSC	H4	H4 MSC	H28834	H28834 MSC	H28834 MSC - GAPDH	MSC	GAPDH	1	H4M2	study-collection-qPCR-H4 - plate2	2020-09-15	Emilie Briscoe	15.6663	2.09663	15.1354			15.4177			15.1354			15.4177			15.1354			15.4177
Sample	Sample MSC	Human	Human MSC	H4	H4 MSC	H28834	H28834 MSC	H28834 MSC - GAPDH	MSC	GAPDH	2	H4M2	study-collection-qPCR-H4 - plate2	2020-09-15	Emilie Briscoe	15.2839	2.09663	15.1354			15.4177			15.1354			15.4177			15.1354			15.4177
Sample	Sample MSC	Human	Human MSC	H4	H4 MSC	H28834	H28834 MSC	H28834 MSC - GAPDH	MSC	GAPDH	3	H4M2	study-collection-qPCR-H4 - plate2	2020-09-15	Emilie Briscoe	15.3029	2.09663	15.1354			15.4177			15.1354			15.4177			15.1354			15.4177
Sample	Sample Adipogenic	Human	Human Adipogenic	H4	H4 Adipogenic	H28834	H28834 Adipogenic	H28834 Adipogenic - GAPDH	Adipogenic	GAPDH	1	H4A2	study-collection-qPCR-H4 - plate2	2020-09-15	Emilie Briscoe	16.9945	2.09663	15.1354			15.4177			15.1354			15.4177			15.1354			15.4177
Sample	Sample Adipogenic	Human	Human Adipogenic	H4	H4 Adipogenic	H28834	H28834 Adipogenic	H28834 Adipogenic - GAPDH	Adipogenic	GAPDH	2	H4A2	study-collection-qPCR-H4 - plate2	2020-09-15	Emilie Briscoe	15.6256	2.09663	15.1354			15.4177			15.1354			15.4177			15.1354			15.4177
Sample	Sample Adipogenic	Human	Human Adipogenic	H4	H4 Adipogenic	H28834	H28834 Adipogenic	H28834 Adipogenic - GAPDH	Adipogenic	GAPDH	3	H4A2	study-collection-qPCR-H4 - plate2	2020-09-15	Emilie Briscoe	15.7066	2.09663	15.1354			15.4177			15.1354			15.4177			15.1354			15.4177
Sample	Sample Chondrogenic	Human	Human Chondrogenic	H4	H4 Chondrogenic	H28834	H28834 Chondrogenic	H28834 Chondrogenic - GAPDH	Chondrogenic	GAPDH	1	H4C2	study-collection-qPCR-H4 - plate2	2020-09-15	Emilie Briscoe	18.366	2.09663	15.1354			15.4177			15.1354			15.4177			15.1354			15.4177
Sample	Sample Chondrogenic	Human	Human Chondrogenic	H4	H4 Chondrogenic	H28834	H28834 Chondrogenic	H28834 Chondrogenic - GAPDH	Chondrogenic	GAPDH	2	H4C2	study-collection-qPCR-H4 - plate2	2020-09-15	Emilie Briscoe	17.2477	2.09663	15.1354			15.4177			15.1354			15.4177			15.1354			15.4177
Sample	Sample Chondrogenic	Human	Human Chondrogenic	H4	H4 Chondrogenic	H28834	H28834 Chondrogenic	H28834 Chondrogenic - GAPDH	Chondrogenic	GAPDH	3	H4C2	study-collection-qPCR-H4 - plate2	2020-09-15	Emilie Briscoe	16.9098	2.09663	15.1354			15.4177			15.1354			15.4177			15.1354			15.4177
Sample	Sample Osteogenic	Human	Human Osteogenic	H4	H4 Osteogenic	H28834	H28834 Osteogenic	H28834 Osteogenic - GAPDH	Osteogenic	GAPDH	1	H4O2	study-collection-qPCR-H4 - plate2	2020-09-15	Emilie Briscoe	17.0967	2.09663	15.1354			15.4177			15.1354			15.4177			15.1354			15.4177
Sample	Sample Osteogenic	Human	Human Osteogenic	H4	H4 Osteogenic	H28834	H28834 Osteogenic	H28834 Osteogenic - GAPDH	Osteogenic	GAPDH	2	H4O2	study-collection-qPCR-H4 - plate2	2020-09-15	Emilie Briscoe	16.6866	2.09663	15.1354			15.4177			15.1354			15.4177			15.1354			15.4177
Sample	Sample Osteogenic	Human	Human Osteogenic	H4	H4 Osteogenic	H28834	H28834 Osteogenic	H28834 Osteogenic - GAPDH	Osteogenic	GAPDH	3	H4O2	study-collection-qPCR-H4 - plate2	2020-09-15	Emilie Briscoe	16.8708	2.09663	15.1354			15.4177			15.1354			15.4177			15.1354			15.4177
Sample	Sample iPSC	Human	Human iPSC	H5	H5 iPSC	H21792	H21792 iPSC	H21792 iPSC - GAPDH	iPSC	GAPDH	1	H5I2	study-collection-qPCR-H5 - plate1	2020-09-25	Emilie Briscoe	16.4034	2.02201	15.1605			15.0859			15.1605			15.0859			15.1605			15.0859
Sample	Sample iPSC	Human	Human iPSC	H5	H5 iPSC	H21792	H21792 iPSC	H21792 iPSC - GAPDH	iPSC	GAPDH	2	H5I2	study-collection-qPCR-H5 - plate1	2020-09-25	Emilie Briscoe	14.5082	2.02201	15.1605			15.0859			15.1605			15.0859			15.1605			15.0859
Sample	Sample iPSC	Human	Human iPSC	H5	H5 iPSC	H21792	H21792 iPSC	H21792 iPSC - GAPDH	iPSC	GAPDH	3	H5I2	study-collection-qPCR-H5 - plate1	2020-09-25	Emilie Briscoe	14.57	2.02201	15.1605			15.0859			15.1605			15.0859			15.1605			15.0859
Sample	Sample MSC	Human	Human MSC	H5	H5 MSC	H21792	H21792 MSC	H21792 MSC - GAPDH	MSC	GAPDH	1	H5M2	study-collection-qPCR-H5 - plate1	2020-09-25	Emilie Briscoe	15.165	2.02201	15.1605			15.0859			15.1605			15.0859			15.1605			15.0859
Sample	Sample MSC	Human	Human MSC	H5	H5 MSC	H21792	H21792 MSC	H21792 MSC - GAPDH	MSC	GAPDH	2	H5M2	study-collection-qPCR-H5 - plate1	2020-09-25	Emilie Briscoe	14.4701	2.02201	15.1605			15.0859			15.1605			15.0859			15.1605			15.0859
Sample	Sample MSC	Human	Human MSC	H5	H5 MSC	H21792	H21792 MSC	H21792 MSC - GAPDH	MSC	GAPDH	3	H5M2	study-collection-qPCR-H5 - plate1	2020-09-25	Emilie Briscoe	15.6225	2.02201	15.1605			15.0859			15.1605			15.0859			15.1605			15.0859
Sample	Sample Osteogenic	Human	Human Osteogenic	H5	H5 Osteogenic	H21792	H21792 Osteogenic	H21792 Osteogenic - GAPDH	Osteogenic	GAPDH	1	H5O2	study-collection-qPCR-H5 - plate1	2020-09-25	Emilie Briscoe	17.8218	2.02201	15.1605			15.0859			15.1605			15.0859			15.1605			15.0859
Sample	Sample Osteogenic	Human	Human Osteogenic	H5	H5 Osteogenic	H21792	H21792 Osteogenic	H21792 Osteogenic - GAPDH	Osteogenic	GAPDH	2	H5O2	study-collection-qPCR-H5 - plate1	2020-09-25	Emilie Briscoe	16.9495	2.02201	15.1605			15.0859			15.1605			15.0859			15.1605			15.0859
Sample	Sample Osteogenic	Human	Human Osteogenic	H5	H5 Osteogenic	H21792	H21792 Osteogenic	H21792 Osteogenic - GAPDH	Osteogenic	GAPDH	3	H5O2	study-collection-qPCR-H5 - plate1	2020-09-25	Emilie Briscoe	16.752	2.02201	15.1605			15.0859			15.1605			15.0859			15.1605			15.0859
Sample	Sample iPSC	Human	Human iPSC	H5	H5 iPSC	H21792	H21792 iPSC	H21792 iPSC - GAPDH	iPSC	GAPDH	1	H5I2	study-collection-qPCR-H5 - plate2	2020-09-29	Emilie Briscoe	17.0426	2.16956	16.2408			15.8594			16.2408			15.8594			16.2408			15.8594
Sample	Sample iPSC	Human	Human iPSC	H5	H5 iPSC	H21792	H21792 iPSC	H21792 iPSC - GAPDH	iPSC	GAPDH	2	H5I2	study-collection-qPCR-H5 - plate2	2020-09-29	Emilie Briscoe	16.111	2.16956	16.2408			15.8594			16.2408			15.8594			16.2408			15.8594
Sample	Sample iPSC	Human	Human iPSC	H5	H5 iPSC	H21792	H21792 iPSC	H21792 iPSC - GAPDH	iPSC	GAPDH	3	H5I2	study-collection-qPCR-H5 - plate2	2020-09-29	Emilie Briscoe	15.5688	2.16956	16.2408			15.8594			16.2408			15.8594			16.2408			15.8594
Sample	Sample MSC	Human	Human MSC	H5	H5 MSC	H21792	H21792 MSC	H21792 MSC - GAPDH	MSC	GAPDH	1	H5M2	study-collection-qPCR-H5 - plate2	2020-09-29	Emilie Briscoe	17.0052	2.16956	16.2408			15.8594			16.2408			15.8594			16.2408			15.8594
Sample	Sample MSC	Human	Human MSC	H5	H5 MSC	H21792	H21792 MSC	H21792 MSC - GAPDH	MSC	GAPDH	2	H5M2	study-collection-qPCR-H5 - plate2	2020-09-29	Emilie Briscoe	15.4791	2.16956	16.2408			15.8594			16.2408			15.8594			16.2408			15.8594
Sample	Sample MSC	Human	Human MSC	H5	H5 MSC	H21792	H21792 MSC	H21792 MSC - GAPDH	MSC	GAPDH	3	H5M2	study-collection-qPCR-H5 - plate2	2020-09-29	Emilie Briscoe	15.0939	2.16956	16.2408			15.8594			16.2408			15.8594			16.2408			15.8594
Sample	Sample Osteogenic	Human	Human Osteogenic	H5	H5 Osteogenic	H21792	H21792 Osteogenic	H21792 Osteogenic - GAPDH	Osteogenic	GAPDH	1	H5O2	study-collection-qPCR-H5 - plate2	2020-09-29	Emilie Briscoe	18.6645	2.16956	16.2408			15.8594			16.2408			15.8594			16.2408			15.8594
Sample	Sample Osteogenic	Human	Human Osteogenic	H5	H5 Osteogenic	H21792	H21792 Osteogenic	H21792 Osteogenic - GAPDH	Osteogenic	GAPDH	2	H5O2	study-collection-qPCR-H5 - plate2	2020-09-29	Emilie Briscoe	17.8441	2.16956	16.2408			15.8594			16.2408			15.8594			16.2408			15.8594
Sample	Sample Osteogenic	Human	Human Osteogenic	H5	H5 Osteogenic	H21792	H21792 Osteogenic	H21792 Osteogenic - GAPDH	Osteogenic	GAPDH	3	H5O2	study-collection-qPCR-H5 - plate2	2020-09-29	Emilie Briscoe	16.6731	2.16956	16.2408			15.8594			16.2408			15.8594			16.2408			15.8594
Sample	Sample iPSC	Human	Human iPSC	H6	H6 iPSC	H20961	H20961 iPSC	H20961 iPSC - GAPDH	iPSC	GAPDH	1	H6I2	study-collection-qPCR-H6 - plate1	2020-10-09	Emilie Briscoe	16.0956	2.14216	15.3548			14.7114			15.3548			14.7114			15.3548			14.7114
Sample	Sample iPSC	Human	Human iPSC	H6	H6 iPSC	H20961	H20961 iPSC	H20961 iPSC - GAPDH	iPSC	GAPDH	2	H6I2	study-collection-qPCR-H6 - plate1	2020-10-09	Emilie Briscoe	15.095	2.14216	15.3548			14.7114			15.3548			14.7114			15.3548			14.7114
Sample	Sample iPSC	Human	Human iPSC	H6	H6 iPSC	H20961	H20961 iPSC	H20961 iPSC - GAPDH	iPSC	GAPDH	3	H6I2	study-collection-qPCR-H6 - plate1	2020-10-09	Emilie Briscoe	14.8738	2.14216	15.3548			14.7114			15.3548			14.7114			15.3548			14.7114
Sample	Sample MSC	Human	Human MSC	H6	H6 MSC	H20961	H20961 MSC	H20961 MSC - GAPDH	MSC	GAPDH	1	H6M2	study-collection-qPCR-H6 - plate1	2020-10-09	Emilie Briscoe	14.6647	2.14216	15.3548			14.7114			15.3548			14.7114			15.3548			14.7114
Sample	Sample MSC	Human	Human MSC	H6	H6 MSC	H20961	H20961 MSC	H20961 MSC - GAPDH	MSC	GAPDH	2	H6M2	study-collection-qPCR-H6 - plate1	2020-10-09	Emilie Briscoe	14.6978	2.14216	15.3548			14.7114			15.3548			14.7114			15.3548			14.7114
Sample	Sample MSC	Human	Human MSC	H6	H6 MSC	H20961	H20961 MSC	H20961 MSC - GAPDH	MSC	GAPDH	3	H6M2	study-collection-qPCR-H6 - plate1	2020-10-09	Emilie Briscoe	14.7717	2.14216	15.3548			14.7114			15.3548			14.7114			15.3548			14.7114
Sample	Sample Adipogenic	Human	Human Adipogenic	H6	H6 Adipogenic	H20961	H20961 Adipogenic	H20961 Adipogenic - GAPDH	Adipogenic	GAPDH	1	H6A1	study-collection-qPCR-H6 - plate1	2020-10-09	Emilie Briscoe	16.3316	2.14216	15.3548			14.7114			15.3548			14.7114			15.3548			14.7114
Sample	Sample Adipogenic	Human	Human Adipogenic	H6	H6 Adipogenic	H20961	H20961 Adipogenic	H20961 Adipogenic - GAPDH	Adipogenic	GAPDH	2	H6A1	study-collection-qPCR-H6 - plate1	2020-10-09	Emilie Briscoe	14.9142	2.14216	15.3548			14.7114			15.3548			14.7114			15.3548			14.7114
Sample	Sample Adipogenic	Human	Human Adipogenic	H6	H6 Adipogenic	H20961	H20961 Adipogenic	H20961 Adipogenic - GAPDH	Adipogenic	GAPDH	3	H6A1	study-collection-qPCR-H6 - plate1	2020-10-09	Emilie Briscoe	15.5675	2.14216	15.3548			14.7114			15.3548			14.7114			15.3548			14.7114
Sample	Sample Chondrogenic	Human	Human Chondrogenic	H6	H6 Chondrogenic	H20961	H20961 Chondrogenic	H20961 Chondrogenic - GAPDH	Chondrogenic	GAPDH	1	H6C1	study-collection-qPCR-H6 - plate1	2020-10-09	Emilie Briscoe	18.7484	2.14216	15.3548			14.7114			15.3548			14.7114			15.3548			14.7114
Sample	Sample Chondrogenic	Human	Human Chondrogenic	H6	H6 Chondrogenic	H20961	H20961 Chondrogenic	H20961 Chondrogenic - GAPDH	Chondrogenic	GAPDH	2	H6C1	study-collection-qPCR-H6 - plate1	2020-10-09	Emilie Briscoe	16.3831	2.14216	15.3548			14.7114			15.3548			14.7114			15.3548			14.7114
Sample	Sample Chondrogenic	Human	Human Chondrogenic	H6	H6 Chondrogenic	H20961	H20961 Chondrogenic	H20961 Chondrogenic - GAPDH	Chondrogenic	GAPDH	3	H6C1	study-collection-qPCR-H6 - plate1	2020-10-09	Emilie Briscoe	15.712	2.14216	15.3548			14.7114			15.3548			14.7114			15.3548			14.7114
Sample	Sample Osteogenic	Human	Human Osteogenic	H6	H6 Osteogenic	H20961	H20961 Osteogenic	H20961 Osteogenic - GAPDH	Osteogenic	GAPDH	1	H6O3	study-collection-qPCR-H6 - plate1	2020-10-09	Emilie Briscoe	16.7849	2.14216	15.3548			14.7114			15.3548			14.7114			15.3548			14.7114
Sample	Sample Osteogenic	Human	Human Osteogenic	H6	H6 Osteogenic	H20961	H20961 Osteogenic	H20961 Osteogenic - GAPDH	Osteogenic	GAPDH	2	H6O3	study-collection-qPCR-H6 - plate1	2020-10-09	Emilie Briscoe	16.6458	2.14216	15.3548			14.7114			15.3548			14.7114			15.3548			14.7114
Sample	Sample Osteogenic	Human	Human Osteogenic	H6	H6 Osteogenic	H20961	H20961 Osteogenic	H20961 Osteogenic - GAPDH	Osteogenic	GAPDH	3	H6O3	study-collection-qPCR-H6 - plate1	2020-10-09	Emilie Briscoe	16.5686	2.14216	15.3548			14.7114			15.3548			14.7114			15.3548			14.7114
Sample	Sample iPSC	Human	Human iPSC	H6	H6 iPSC	H20961	H20961 iPSC	H20961 iPSC - GAPDH	iPSC	GAPDH	1	H6I2	study-collection-qPCR-H6 - plate2	2021-10-13	Emilie Briscoe	17.8245	2.07313	16.2892			15.5328			16.2892			15.5328			16.2892			15.5328
Sample	Sample iPSC	Human	Human iPSC	H6	H6 iPSC	H20961	H20961 iPSC	H20961 iPSC - GAPDH	iPSC	GAPDH	2	H6I2	study-collection-qPCR-H6 - plate2	2021-10-13	Emilie Briscoe	15.557	2.07313	16.2892			15.5328			16.2892			15.5328			16.2892			15.5328
Sample	Sample iPSC	Human	Human iPSC	H6	H6 iPSC	H20961	H20961 iPSC	H20961 iPSC - GAPDH	iPSC	GAPDH	3	H6I2	study-collection-qPCR-H6 - plate2	2021-10-13	Emilie Briscoe	15.486	2.07313	16.2892			15.5328			16.2892			15.5328			16.2892			15.5328
Sample	Sample MSC	Human	Human MSC	H6	H6 MSC	H20961	H20961 MSC	H20961 MSC - GAPDH	MSC	GAPDH	1	H6M2	study-collection-qPCR-H6 - plate2	2021-10-13	Emilie Briscoe	15.7766	2.07313	16.2892			15.5328			16.2892			15.5328			16.2892			15.5328
Sample	Sample MSC	Human	Human MSC	H6	H6 MSC	H20961	H20961 MSC	H20961 MSC - GAPDH	MSC	GAPDH	2	H6M2	study-collection-qPCR-H6 - plate2	2021-10-13	Emilie Briscoe	15.2991	2.07313	16.2892			15.5328			16.2892			15.5328			16.2892			15.5328
Sample	Sample MSC	Human	Human MSC	H6	H6 MSC	H20961	H20961 MSC	H20961 MSC - GAPDH	MSC	GAPDH	3	H6M2	study-collection-qPCR-H6 - plate2	2021-10-13	Emilie Briscoe	15.5228	2.07313	16.2892			15.5328			16.2892			15.5328			16.2892			15.5328
Sample	Sample Adipogenic	Human	Human Adipogenic	H6	H6 Adipogenic	H20961	H20961 Adipogenic	H20961 Adipogenic - GAPDH	Adipogenic	GAPDH	1	H6A1	study-collection-qPCR-H6 - plate2	2021-10-13	Emilie Briscoe	19.8261	2.07313	16.2892			15.5328			16.2892			15.5328			16.2892			15.5328
Sample	Sample Adipogenic	Human	Human Adipogenic	H6	H6 Adipogenic	H20961	H20961 Adipogenic	H20961 Adipogenic - GAPDH	Adipogenic	GAPDH	2	H6A1	study-collection-qPCR-H6 - plate2	2021-10-13	Emilie Briscoe	16.6039	2.07313	16.2892			15.5328			16.2892			15.5328			16.2892			15.5328
Sample	Sample Adipogenic	Human	Human Adipogenic	H6	H6 Adipogenic	H20961	H20961 Adipogenic	H20961 Adipogenic - GAPDH	Adipogenic	GAPDH	3	H6A1	study-collection-qPCR-H6 - plate2	2021-10-13	Emilie Briscoe	16.8405	2.07313	16.2892			15.5328			16.2892			15.5328			16.2892			15.5328
Sample	Sample Chondrogenic	Human	Human Chondrogenic	H6	H6 Chondrogenic	H20961	H20961 Chondrogenic	H20961 Chondrogenic - GAPDH	Chondrogenic	GAPDH	1	H6C1	study-collection-qPCR-H6 - plate2	2021-10-13	Emilie Briscoe	18.5471	2.07313	16.2892			15.5328			16.2892			15.5328			16.2892			15.5328
Sample	Sample Chondrogenic	Human	Human Chondrogenic	H6	H6 Chondrogenic	H20961	H20961 Chondrogenic	H20961 Chondrogenic - GAPDH	Chondrogenic	GAPDH	2	H6C1	study-collection-qPCR-H6 - plate2	2021-10-13	Emilie Briscoe	16.3025	2.07313	16.2892			15.5328			16.2892			15.5328			16.2892			15.5328
Sample	Sample Chondrogenic	Human	Human Chondrogenic	H6	H6 Chondrogenic	H20961	H20961 Chondrogenic	H20961 Chondrogenic - GAPDH	Chondrogenic	GAPDH	3	H6C1	study-collection-qPCR-H6 - plate2	2021-10-13	Emilie Briscoe	16.4996	2.07313	16.2892			15.5328			16.2892			15.5328			16.2892			15.5328
Sample	Sample Osteogenic	Human	Human Osteogenic	H6	H6 Osteogenic	H20961	H20961 Osteogenic	H20961 Osteogenic - GAPDH	Osteogenic	GAPDH	1	H6O3	study-collection-qPCR-H6 - plate2	2021-10-13	Emilie Briscoe	18.2839	2.07313	16.2892			15.5328			16.2892			15.5328			16.2892			15.5328
Sample	Sample Osteogenic	Human	Human Osteogenic	H6	H6 Osteogenic	H20961	H20961 Osteogenic	H20961 Osteogenic - GAPDH	Osteogenic	GAPDH	2	H6O3	study-collection-qPCR-H6 - plate2	2021-10-13	Emilie Briscoe	17.5266	2.07313	16.2892			15.5328			16.2892			15.5328			16.2892			15.5328
Sample	Sample Osteogenic	Human	Human Osteogenic	H6	H6 Osteogenic	H20961	H20961 Osteogenic	H20961 Osteogenic - GAPDH	Osteogenic	GAPDH	3	H6O3	study-collection-qPCR-H6 - plate2	2021-10-13	Emilie Briscoe	17.7431	2.07313	16.2892			15.5328			16.2892			15.5328			16.2892			15.5328
Sample	Sample iPSC	Chimpanzee	Chimpanzee iPSC	C1-r2	C1-r2 iPSC	C8861	C8861 (rep2) iPSC	C8861 (rep2) iPSC - GAPDH	iPSC	GAPDH	1	C1Ir2	study-collection-qPCR-C1r - plate1	2020-10-30	Emilie Briscoe	17.8047	2.03899	16.7423			15.5134			16.7423			15.5134			16.7423			15.5134
Sample	Sample iPSC	Chimpanzee	Chimpanzee iPSC	C1-r2	C1-r2 iPSC	C8861	C8861 (rep2) iPSC	C8861 (rep2) iPSC - GAPDH	iPSC	GAPDH	2	C1Ir2	study-collection-qPCR-C1r - plate1	2020-10-30	Emilie Briscoe	16.2401	2.03899	16.7423			15.5134			16.7423			15.5134			16.7423			15.5134
Sample	Sample iPSC	Chimpanzee	Chimpanzee iPSC	C1-r2	C1-r2 iPSC	C8861	C8861 (rep2) iPSC	C8861 (rep2) iPSC - GAPDH	iPSC	GAPDH	3	C1Ir2	study-collection-qPCR-C1r - plate1	2020-10-30	Emilie Briscoe	16.1822	2.03899	16.7423			15.5134			16.7423			15.5134			16.7423			15.5134
Sample	Sample MSC	Chimpanzee	Chimpanzee MSC	C1-r2	C1-r2 MSC	C8861	C8861 (rep2) MSC	C8861 (rep2) MSC - GAPDH	MSC	GAPDH	1	C1Mr1	study-collection-qPCR-C1r - plate1	2020-10-30	Emilie Briscoe	15.768	2.03899	16.7423			15.5134			16.7423			15.5134			16.7423			15.5134
Sample	Sample MSC	Chimpanzee	Chimpanzee MSC	C1-r2	C1-r2 MSC	C8861	C8861 (rep2) MSC	C8861 (rep2) MSC - GAPDH	MSC	GAPDH	2	C1Mr1	study-collection-qPCR-C1r - plate1	2020-10-30	Emilie Briscoe	15.3585	2.03899	16.7423			15.5134			16.7423			15.5134			16.7423			15.5134
Sample	Sample MSC	Chimpanzee	Chimpanzee MSC	C1-r2	C1-r2 MSC	C8861	C8861 (rep2) MSC	C8861 (rep2) MSC - GAPDH	MSC	GAPDH	3	C1Mr1	study-collection-qPCR-C1r - plate1	2020-10-30	Emilie Briscoe	15.4137	2.03899	16.7423			15.5134			16.7423			15.5134			16.7423			15.5134
Sample	Sample Adipogenic	Chimpanzee	Chimpanzee Adipogenic	C1-r2	C1-r2 Adipogenic	C8861	C8861 (rep2) Adipogenic	C8861 (rep2) Adipogenic - GAPDH	Adipogenic	GAPDH	1	C1Ar2	study-collection-qPCR-C1r - plate1	2020-10-30	Emilie Briscoe	18.8382	2.03899	16.7423			15.5134			16.7423			15.5134			16.7423			15.5134
Sample	Sample Adipogenic	Chimpanzee	Chimpanzee Adipogenic	C1-r2	C1-r2 Adipogenic	C8861	C8861 (rep2) Adipogenic	C8861 (rep2) Adipogenic - GAPDH	Adipogenic	GAPDH	2	C1Ar2	study-collection-qPCR-C1r - plate1	2020-10-30	Emilie Briscoe	17.5866	2.03899	16.7423			15.5134			16.7423			15.5134			16.7423			15.5134
Sample	Sample Adipogenic	Chimpanzee	Chimpanzee Adipogenic	C1-r2	C1-r2 Adipogenic	C8861	C8861 (rep2) Adipogenic	C8861 (rep2) Adipogenic - GAPDH	Adipogenic	GAPDH	3	C1Ar2	study-collection-qPCR-C1r - plate1	2020-10-30	Emilie Briscoe	17.8449	2.03899	16.7423			15.5134			16.7423			15.5134			16.7423			15.5134
Sample	Sample Chondrogenic	Chimpanzee	Chimpanzee Chondrogenic	C1-r2	C1-r2 Chondrogenic	C8861	C8861 (rep2) Chondrogenic	C8861 (rep2) Chondrogenic - GAPDH	Chondrogenic	GAPDH	1	C1Cr2	study-collection-qPCR-C1r - plate1	2020-10-30	Emilie Briscoe	17.9425	2.03899	16.7423			15.5134			16.7423			15.5134			16.7423			15.5134
Sample	Sample Chondrogenic	Chimpanzee	Chimpanzee Chondrogenic	C1-r2	C1-r2 Chondrogenic	C8861	C8861 (rep2) Chondrogenic	C8861 (rep2) Chondrogenic - GAPDH	Chondrogenic	GAPDH	2	C1Cr2	study-collection-qPCR-C1r - plate1	2020-10-30	Emilie Briscoe	16.635	2.03899	16.7423			15.5134			16.7423			15.5134			16.7423			15.5134
Sample	Sample Chondrogenic	Chimpanzee	Chimpanzee Chondrogenic	C1-r2	C1-r2 Chondrogenic	C8861	C8861 (rep2) Chondrogenic	C8861 (rep2) Chondrogenic - GAPDH	Chondrogenic	GAPDH	3	C1Cr2	study-collection-qPCR-C1r - plate1	2020-10-30	Emilie Briscoe	16.9059	2.03899	16.7423			15.5134			16.7423			15.5134			16.7423			15.5134
Sample	Sample Osteogenic	Chimpanzee	Chimpanzee Osteogenic	C1-r2	C1-r2 Osteogenic	C8861	C8861 (rep2) Osteogenic	C8861 (rep2) Osteogenic - GAPDH	Osteogenic	GAPDH	1	C1Or2	study-collection-qPCR-C1r - plate1	2020-10-30	Emilie Briscoe	19.6104	2.03899	16.7423			15.5134			16.7423			15.5134			16.7423			15.5134
Sample	Sample Osteogenic	Chimpanzee	Chimpanzee Osteogenic	C1-r2	C1-r2 Osteogenic	C8861	C8861 (rep2) Osteogenic	C8861 (rep2) Osteogenic - GAPDH	Osteogenic	GAPDH	2	C1Or2	study-collection-qPCR-C1r - plate1	2020-10-30	Emilie Briscoe	17.8941	2.03899	16.7423			15.5134			16.7423			15.5134			16.7423			15.5134
Sample	Sample Osteogenic	Chimpanzee	Chimpanzee Osteogenic	C1-r2	C1-r2 Osteogenic	C8861	C8861 (rep2) Osteogenic	C8861 (rep2) Osteogenic - GAPDH	Osteogenic	GAPDH	3	C1Or2	study-collection-qPCR-C1r - plate1	2020-10-30	Emilie Briscoe	18.1921	2.03899	16.7423			15.5134			16.7423			15.5134			16.7423			15.5134
Sample	Sample iPSC	Chimpanzee	Chimpanzee iPSC	C1-r2	C1-r2 iPSC	C8861	C8861 (rep2) iPSC	C8861 (rep2) iPSC - GAPDH	iPSC	GAPDH	1	C1Ir2	study-collection-qPCR-C1r - plate2	2020-11-03	Emilie Briscoe	19.1359	2.12236	17.8947			16.8717			17.8947			16.8717			17.8947			16.8717
Sample	Sample iPSC	Chimpanzee	Chimpanzee iPSC	C1-r2	C1-r2 iPSC	C8861	C8861 (rep2) iPSC	C8861 (rep2) iPSC - GAPDH	iPSC	GAPDH	2	C1Ir2	study-collection-qPCR-C1r - plate2	2020-11-03	Emilie Briscoe	17.408	2.12236	17.8947			16.8717			17.8947			16.8717			17.8947			16.8717
Sample	Sample iPSC	Chimpanzee	Chimpanzee iPSC	C1-r2	C1-r2 iPSC	C8861	C8861 (rep2) iPSC	C8861 (rep2) iPSC - GAPDH	iPSC	GAPDH	3	C1Ir2	study-collection-qPCR-C1r - plate2	2020-11-03	Emilie Briscoe	17.1402	2.12236	17.8947			16.8717			17.8947			16.8717			17.8947			16.8717
Sample	Sample MSC	Chimpanzee	Chimpanzee MSC	C1-r2	C1-r2 MSC	C8861	C8861 (rep2) MSC	C8861 (rep2) MSC - GAPDH	MSC	GAPDH	1	C1Mr1	study-collection-qPCR-C1r - plate2	2020-11-03	Emilie Briscoe	17.5719	2.12236	17.8947			16.8717			17.8947			16.8717			17.8947			16.8717
Sample	Sample MSC	Chimpanzee	Chimpanzee MSC	C1-r2	C1-r2 MSC	C8861	C8861 (rep2) MSC	C8861 (rep2) MSC - GAPDH	MSC	GAPDH	2	C1Mr1	study-collection-qPCR-C1r - plate2	2020-11-03	Emilie Briscoe	16.5587	2.12236	17.8947			16.8717			17.8947			16.8717			17.8947			16.8717
Sample	Sample MSC	Chimpanzee	Chimpanzee MSC	C1-r2	C1-r2 MSC	C8861	C8861 (rep2) MSC	C8861 (rep2) MSC - GAPDH	MSC	GAPDH	3	C1Mr1	study-collection-qPCR-C1r - plate2	2020-11-03	Emilie Briscoe	16.4845	2.12236	17.8947			16.8717			17.8947			16.8717			17.8947			16.8717
Sample	Sample Adipogenic	Chimpanzee	Chimpanzee Adipogenic	C1-r2	C1-r2 Adipogenic	C8861	C8861 (rep2) Adipogenic	C8861 (rep2) Adipogenic - GAPDH	Adipogenic	GAPDH	1	C1Ar2	study-collection-qPCR-C1r - plate2	2020-11-03	Emilie Briscoe	20.5251	2.12236	17.8947			16.8717			17.8947			16.8717			17.8947			16.8717
Sample	Sample Adipogenic	Chimpanzee	Chimpanzee Adipogenic	C1-r2	C1-r2 Adipogenic	C8861	C8861 (rep2) Adipogenic	C8861 (rep2) Adipogenic - GAPDH	Adipogenic	GAPDH	2	C1Ar2	study-collection-qPCR-C1r - plate2	2020-11-03	Emilie Briscoe	18.078	2.12236	17.8947			16.8717			17.8947			16.8717			17.8947			16.8717
Sample	Sample Adipogenic	Chimpanzee	Chimpanzee Adipogenic	C1-r2	C1-r2 Adipogenic	C8861	C8861 (rep2) Adipogenic	C8861 (rep2) Adipogenic - GAPDH	Adipogenic	GAPDH	3	C1Ar2	study-collection-qPCR-C1r - plate2	2020-11-03	Emilie Briscoe	18.5619	2.12236	17.8947			16.8717			17.8947			16.8717			17.8947			16.8717
Sample	Sample Chondrogenic	Chimpanzee	Chimpanzee Chondrogenic	C1-r2	C1-r2 Chondrogenic	C8861	C8861 (rep2) Chondrogenic	C8861 (rep2) Chondrogenic - GAPDH	Chondrogenic	GAPDH	1	C1Cr2	study-collection-qPCR-C1r - plate2	2020-11-03	Emilie Briscoe	19.8415	2.12236	17.8947			16.8717			17.8947			16.8717			17.8947			16.8717
Sample	Sample Chondrogenic	Chimpanzee	Chimpanzee Chondrogenic	C1-r2	C1-r2 Chondrogenic	C8861	C8861 (rep2) Chondrogenic	C8861 (rep2) Chondrogenic - GAPDH	Chondrogenic	GAPDH	2	C1Cr2	study-collection-qPCR-C1r - plate2	2020-11-03	Emilie Briscoe	18.0385	2.12236	17.8947			16.8717			17.8947			16.8717			17.8947			16.8717
Sample	Sample Chondrogenic	Chimpanzee	Chimpanzee Chondrogenic	C1-r2	C1-r2 Chondrogenic	C8861	C8861 (rep2) Chondrogenic	C8861 (rep2) Chondrogenic - GAPDH	Chondrogenic	GAPDH	3	C1Cr2	study-collection-qPCR-C1r - plate2	2020-11-03	Emilie Briscoe	18.4476	2.12236	17.8947			16.8717			17.8947			16.8717			17.8947			16.8717
Sample	Sample Osteogenic	Chimpanzee	Chimpanzee Osteogenic	C1-r2	C1-r2 Osteogenic	C8861	C8861 (rep2) Osteogenic	C8861 (rep2) Osteogenic - GAPDH	Osteogenic	GAPDH	1	C1Or2	study-collection-qPCR-C1r - plate2	2020-11-03	Emilie Briscoe	19.9932	2.12236	17.8947			16.8717			17.8947			16.8717			17.8947			16.8717
Sample	Sample Osteogenic	Chimpanzee	Chimpanzee Osteogenic	C1-r2	C1-r2 Osteogenic	C8861	C8861 (rep2) Osteogenic	C8861 (rep2) Osteogenic - GAPDH	Osteogenic	GAPDH	2	C1Or2	study-collection-qPCR-C1r - plate2	2020-11-03	Emilie Briscoe	18.1218	2.12236	17.8947			16.8717			17.8947			16.8717			17.8947			16.8717
Sample	Sample Osteogenic	Chimpanzee	Chimpanzee Osteogenic	C1-r2	C1-r2 Osteogenic	C8861	C8861 (rep2) Osteogenic	C8861 (rep2) Osteogenic - GAPDH	Osteogenic	GAPDH	3	C1Or2	study-collection-qPCR-C1r - plate2	2020-11-03	Emilie Briscoe	18.7541	2.12236	17.8947			16.8717			17.8947			16.8717			17.8947			16.8717
Sample	Sample iPSC	Chimpanzee	Chimpanzee iPSC	C2	C2 iPSC	C3647	C3647 iPSC	C3647 iPSC - GAPDH	iPSC	GAPDH	1	C2I2	study-collection-qPCR-C2 - plate1	2020-08-12	Emilie Briscoe	16.7372	2.02528	15.2401			16.7935			15.2401			16.7935			15.2401			16.7935
Sample	Sample iPSC	Chimpanzee	Chimpanzee iPSC	C2	C2 iPSC	C3647	C3647 iPSC	C3647 iPSC - GAPDH	iPSC	GAPDH	2	C2I2	study-collection-qPCR-C2 - plate1	2020-08-12	Emilie Briscoe	14.413	2.02528	15.2401			16.7935			15.2401			16.7935			15.2401			16.7935
Sample	Sample iPSC	Chimpanzee	Chimpanzee iPSC	C2	C2 iPSC	C3647	C3647 iPSC	C3647 iPSC - GAPDH	iPSC	GAPDH	3	C2I2	study-collection-qPCR-C2 - plate1	2020-08-12	Emilie Briscoe	14.5701	2.02528	15.2401			16.7935			15.2401			16.7935			15.2401			16.7935
Sample	Sample MSC	Chimpanzee	Chimpanzee MSC	C2	C2 MSC	C3647	C3647 MSC	C3647 MSC - GAPDH	MSC	GAPDH	1	C2M2	study-collection-qPCR-C2 - plate1	2020-08-12	Emilie Briscoe	17.5396	2.02528	15.2401			16.7935			15.2401			16.7935			15.2401			16.7935
Sample	Sample MSC	Chimpanzee	Chimpanzee MSC	C2	C2 MSC	C3647	C3647 MSC	C3647 MSC - GAPDH	MSC	GAPDH	2	C2M2	study-collection-qPCR-C2 - plate1	2020-08-12	Emilie Briscoe	16.0792	2.02528	15.2401			16.7935			15.2401			16.7935			15.2401			16.7935
Sample	Sample MSC	Chimpanzee	Chimpanzee MSC	C2	C2 MSC	C3647	C3647 MSC	C3647 MSC - GAPDH	MSC	GAPDH	3	C2M2	study-collection-qPCR-C2 - plate1	2020-08-12	Emilie Briscoe	16.7618	2.02528	15.2401			16.7935			15.2401			16.7935			15.2401			16.7935
Sample	Sample Adipogenic	Chimpanzee	Chimpanzee Adipogenic	C2	C2 Adipogenic	C3647	C3647 Adipogenic	C3647 Adipogenic - GAPDH	Adipogenic	GAPDH	1	C2A2	study-collection-qPCR-C2 - plate1	2020-08-12	Emilie Briscoe	17.713	2.02528	15.2401			16.7935			15.2401			16.7935			15.2401			16.7935
Sample	Sample Adipogenic	Chimpanzee	Chimpanzee Adipogenic	C2	C2 Adipogenic	C3647	C3647 Adipogenic	C3647 Adipogenic - GAPDH	Adipogenic	GAPDH	2	C2A2	study-collection-qPCR-C2 - plate1	2020-08-12	Emilie Briscoe	17.2023	2.02528	15.2401			16.7935			15.2401			16.7935			15.2401			16.7935
Sample	Sample Adipogenic	Chimpanzee	Chimpanzee Adipogenic	C2	C2 Adipogenic	C3647	C3647 Adipogenic	C3647 Adipogenic - GAPDH	Adipogenic	GAPDH	3	C2A2	study-collection-qPCR-C2 - plate1	2020-08-12	Emilie Briscoe	17.4562	2.02528	15.2401			16.7935			15.2401			16.7935			15.2401			16.7935
Sample	Sample Chondrogenic	Chimpanzee	Chimpanzee Chondrogenic	C2	C2 Chondrogenic	C3647	C3647 Chondrogenic	C3647 Chondrogenic - GAPDH	Chondrogenic	GAPDH	1	C2C2	study-collection-qPCR-C2 - plate1	2020-08-12	Emilie Briscoe	19.4188	2.02528	15.2401			16.7935			15.2401			16.7935			15.2401			16.7935
Sample	Sample Chondrogenic	Chimpanzee	Chimpanzee Chondrogenic	C2	C2 Chondrogenic	C3647	C3647 Chondrogenic	C3647 Chondrogenic - GAPDH	Chondrogenic	GAPDH	2	C2C2	study-collection-qPCR-C2 - plate1	2020-08-12	Emilie Briscoe	19.0295	2.02528	15.2401			16.7935			15.2401			16.7935			15.2401			16.7935
Sample	Sample Chondrogenic	Chimpanzee	Chimpanzee Chondrogenic	C2	C2 Chondrogenic	C3647	C3647 Chondrogenic	C3647 Chondrogenic - GAPDH	Chondrogenic	GAPDH	3	C2C2	study-collection-qPCR-C2 - plate1	2020-08-12	Emilie Briscoe	18.9693	2.02528	15.2401			16.7935			15.2401			16.7935			15.2401			16.7935
Sample	Sample Osteogenic	Chimpanzee	Chimpanzee Osteogenic	C2	C2 Osteogenic	C3647	C3647 Osteogenic	C3647 Osteogenic - GAPDH	Osteogenic	GAPDH	1	C2O1	study-collection-qPCR-C2 - plate1	2020-08-12	Emilie Briscoe	18.9686	2.02528	15.2401			16.7935			15.2401			16.7935			15.2401			16.7935
Sample	Sample Osteogenic	Chimpanzee	Chimpanzee Osteogenic	C2	C2 Osteogenic	C3647	C3647 Osteogenic	C3647 Osteogenic - GAPDH	Osteogenic	GAPDH	2	C2O1	study-collection-qPCR-C2 - plate1	2020-08-12	Emilie Briscoe	18.5329	2.02528	15.2401			16.7935			15.2401			16.7935			15.2401			16.7935
Sample	Sample Osteogenic	Chimpanzee	Chimpanzee Osteogenic	C2	C2 Osteogenic	C3647	C3647 Osteogenic	C3647 Osteogenic - GAPDH	Osteogenic	GAPDH	3	C2O1	study-collection-qPCR-C2 - plate1	2020-08-12	Emilie Briscoe	18.1587	2.02528	15.2401			16.7935			15.2401			16.7935			15.2401			16.7935
Sample	Sample iPSC	Chimpanzee	Chimpanzee iPSC	C2	C2 iPSC	C3647	C3647 iPSC	C3647 iPSC - GAPDH	iPSC	GAPDH	1	C2I2	study-collection-qPCR-C2 - plate2	2020-08-18	Emilie Briscoe	16.3728	1.99453	15.3674			16.4829			15.3674			16.4829			15.3674			16.4829
Sample	Sample iPSC	Chimpanzee	Chimpanzee iPSC	C2	C2 iPSC	C3647	C3647 iPSC	C3647 iPSC - GAPDH	iPSC	GAPDH	2	C2I2	study-collection-qPCR-C2 - plate2	2020-08-18	Emilie Briscoe	15.0016	1.99453	15.3674			16.4829			15.3674			16.4829			15.3674			16.4829
Sample	Sample iPSC	Chimpanzee	Chimpanzee iPSC	C2	C2 iPSC	C3647	C3647 iPSC	C3647 iPSC - GAPDH	iPSC	GAPDH	3	C2I2	study-collection-qPCR-C2 - plate2	2020-08-18	Emilie Briscoe	14.7277	1.99453	15.3674			16.4829			15.3674			16.4829			15.3674			16.4829
Sample	Sample MSC	Chimpanzee	Chimpanzee MSC	C2	C2 MSC	C3647	C3647 MSC	C3647 MSC - GAPDH	MSC	GAPDH	1	C2M2	study-collection-qPCR-C2 - plate2	2020-08-18	Emilie Briscoe	16.96	1.99453	15.3674			16.4829			15.3674			16.4829			15.3674			16.4829
Sample	Sample MSC	Chimpanzee	Chimpanzee MSC	C2	C2 MSC	C3647	C3647 MSC	C3647 MSC - GAPDH	MSC	GAPDH	2	C2M2	study-collection-qPCR-C2 - plate2	2020-08-18	Emilie Briscoe	16.7108	1.99453	15.3674			16.4829			15.3674			16.4829			15.3674			16.4829
Sample	Sample MSC	Chimpanzee	Chimpanzee MSC	C2	C2 MSC	C3647	C3647 MSC	C3647 MSC - GAPDH	MSC	GAPDH	3	C2M2	study-collection-qPCR-C2 - plate2	2020-08-18	Emilie Briscoe	15.7778	1.99453	15.3674			16.4829			15.3674			16.4829			15.3674			16.4829
Sample	Sample Adipogenic	Chimpanzee	Chimpanzee Adipogenic	C2	C2 Adipogenic	C3647	C3647 Adipogenic	C3647 Adipogenic - GAPDH	Adipogenic	GAPDH	1	C2A2	study-collection-qPCR-C2 - plate2	2020-08-18	Emilie Briscoe	18.6366	1.99453	15.3674			16.4829			15.3674			16.4829			15.3674			16.4829
Sample	Sample Adipogenic	Chimpanzee	Chimpanzee Adipogenic	C2	C2 Adipogenic	C3647	C3647 Adipogenic	C3647 Adipogenic - GAPDH	Adipogenic	GAPDH	2	C2A2	study-collection-qPCR-C2 - plate2	2020-08-18	Emilie Briscoe	18.7183	1.99453	15.3674			16.4829			15.3674			16.4829			15.3674			16.4829
Sample	Sample Adipogenic	Chimpanzee	Chimpanzee Adipogenic	C2	C2 Adipogenic	C3647	C3647 Adipogenic	C3647 Adipogenic - GAPDH	Adipogenic	GAPDH	3	C2A2	study-collection-qPCR-C2 - plate2	2020-08-18	Emilie Briscoe	18.0346	1.99453	15.3674			16.4829			15.3674			16.4829			15.3674			16.4829
Sample	Sample Chondrogenic	Chimpanzee	Chimpanzee Chondrogenic	C2	C2 Chondrogenic	C3647	C3647 Chondrogenic	C3647 Chondrogenic - GAPDH	Chondrogenic	GAPDH	1	C2C2	study-collection-qPCR-C2 - plate2	2020-08-18	Emilie Briscoe	19.7988	1.99453	15.3674			16.4829			15.3674			16.4829			15.3674			16.4829
Sample	Sample Chondrogenic	Chimpanzee	Chimpanzee Chondrogenic	C2	C2 Chondrogenic	C3647	C3647 Chondrogenic	C3647 Chondrogenic - GAPDH	Chondrogenic	GAPDH	2	C2C2	study-collection-qPCR-C2 - plate2	2020-08-18	Emilie Briscoe	18.4324	1.99453	15.3674			16.4829			15.3674			16.4829			15.3674			16.4829
Sample	Sample Chondrogenic	Chimpanzee	Chimpanzee Chondrogenic	C2	C2 Chondrogenic	C3647	C3647 Chondrogenic	C3647 Chondrogenic - GAPDH	Chondrogenic	GAPDH	3	C2C2	study-collection-qPCR-C2 - plate2	2020-08-18	Emilie Briscoe	18.4353	1.99453	15.3674			16.4829			15.3674			16.4829			15.3674			16.4829
Sample	Sample Osteogenic	Chimpanzee	Chimpanzee Osteogenic	C2	C2 Osteogenic	C3647	C3647 Osteogenic	C3647 Osteogenic - GAPDH	Osteogenic	GAPDH	1	C2O1	study-collection-qPCR-C2 - plate2	2020-08-18	Emilie Briscoe	18.2689	1.99453	15.3674			16.4829			15.3674			16.4829			15.3674			16.4829
Sample	Sample Osteogenic	Chimpanzee	Chimpanzee Osteogenic	C2	C2 Osteogenic	C3647	C3647 Osteogenic	C3647 Osteogenic - GAPDH	Osteogenic	GAPDH	2	C2O1	study-collection-qPCR-C2 - plate2	2020-08-18	Emilie Briscoe	17.8395	1.99453	15.3674			16.4829			15.3674			16.4829			15.3674			16.4829
Sample	Sample Osteogenic	Chimpanzee	Chimpanzee Osteogenic	C2	C2 Osteogenic	C3647	C3647 Osteogenic	C3647 Osteogenic - GAPDH	Osteogenic	GAPDH	3	C2O1	study-collection-qPCR-C2 - plate2	2020-08-18	Emilie Briscoe	17.3138	1.99453	15.3674			16.4829			15.3674			16.4829			15.3674			16.4829
Sample	Sample iPSC	Chimpanzee	Chimpanzee iPSC	C3	C3 iPSC	C3649	C3649 iPSC	C3649 iPSC - GAPDH	iPSC	GAPDH	1	C3I2	study-collection-qPCR-C3 - plate1	2020-09-01	Emilie Briscoe	15.9377	2.12618	15.6806			16.6828			15.6806			16.6828			15.6806			16.6828
Sample	Sample iPSC	Chimpanzee	Chimpanzee iPSC	C3	C3 iPSC	C3649	C3649 iPSC	C3649 iPSC - GAPDH	iPSC	GAPDH	2	C3I2	study-collection-qPCR-C3 - plate1	2020-09-01	Emilie Briscoe	15.8379	2.12618	15.6806			16.6828			15.6806			16.6828			15.6806			16.6828
Sample	Sample iPSC	Chimpanzee	Chimpanzee iPSC	C3	C3 iPSC	C3649	C3649 iPSC	C3649 iPSC - GAPDH	iPSC	GAPDH	3	C3I2	study-collection-qPCR-C3 - plate1	2020-09-01	Emilie Briscoe	15.2662	2.12618	15.6806			16.6828			15.6806			16.6828			15.6806			16.6828
Sample	Sample MSC	Chimpanzee	Chimpanzee MSC	C3	C3 MSC	C3649	C3649 MSC	C3649 MSC - GAPDH	MSC	GAPDH	1	C3M2	study-collection-qPCR-C3 - plate1	2020-09-01	Emilie Briscoe	17.3744	2.12618	15.6806			16.6828			15.6806			16.6828			15.6806			16.6828
Sample	Sample MSC	Chimpanzee	Chimpanzee MSC	C3	C3 MSC	C3649	C3649 MSC	C3649 MSC - GAPDH	MSC	GAPDH	2	C3M2	study-collection-qPCR-C3 - plate1	2020-09-01	Emilie Briscoe	16.5821	2.12618	15.6806			16.6828			15.6806			16.6828			15.6806			16.6828
Sample	Sample MSC	Chimpanzee	Chimpanzee MSC	C3	C3 MSC	C3649	C3649 MSC	C3649 MSC - GAPDH	MSC	GAPDH	3	C3M2	study-collection-qPCR-C3 - plate1	2020-09-01	Emilie Briscoe	16.0919	2.12618	15.6806			16.6828			15.6806			16.6828			15.6806			16.6828
Sample	Sample Adipogenic	Chimpanzee	Chimpanzee Adipogenic	C3	C3 Adipogenic	C3649	C3649 Adipogenic	C3649 Adipogenic - GAPDH	Adipogenic	GAPDH	1	C3A2	study-collection-qPCR-C3 - plate1	2020-09-01	Emilie Briscoe	15.8728	2.12618	15.6806			16.6828			15.6806			16.6828			15.6806			16.6828
Sample	Sample Adipogenic	Chimpanzee	Chimpanzee Adipogenic	C3	C3 Adipogenic	C3649	C3649 Adipogenic	C3649 Adipogenic - GAPDH	Adipogenic	GAPDH	2	C3A2	study-collection-qPCR-C3 - plate1	2020-09-01	Emilie Briscoe	15.3794	2.12618	15.6806			16.6828			15.6806			16.6828			15.6806			16.6828
Sample	Sample Adipogenic	Chimpanzee	Chimpanzee Adipogenic	C3	C3 Adipogenic	C3649	C3649 Adipogenic	C3649 Adipogenic - GAPDH	Adipogenic	GAPDH	3	C3A2	study-collection-qPCR-C3 - plate1	2020-09-01	Emilie Briscoe	15.9921	2.12618	15.6806			16.6828			15.6806			16.6828			15.6806			16.6828
Sample	Sample Chondrogenic	Chimpanzee	Chimpanzee Chondrogenic	C3	C3 Chondrogenic	C3649	C3649 Chondrogenic	C3649 Chondrogenic - GAPDH	Chondrogenic	GAPDH	1	C3C2	study-collection-qPCR-C3 - plate1	2020-09-01	Emilie Briscoe	17.4786	2.12618	15.6806			16.6828			15.6806			16.6828			15.6806			16.6828
Sample	Sample Chondrogenic	Chimpanzee	Chimpanzee Chondrogenic	C3	C3 Chondrogenic	C3649	C3649 Chondrogenic	C3649 Chondrogenic - GAPDH	Chondrogenic	GAPDH	2	C3C2	study-collection-qPCR-C3 - plate1	2020-09-01	Emilie Briscoe	17.224	2.12618	15.6806			16.6828			15.6806			16.6828			15.6806			16.6828
Sample	Sample Chondrogenic	Chimpanzee	Chimpanzee Chondrogenic	C3	C3 Chondrogenic	C3649	C3649 Chondrogenic	C3649 Chondrogenic - GAPDH	Chondrogenic	GAPDH	3	C3C2	study-collection-qPCR-C3 - plate1	2020-09-01	Emilie Briscoe	17.1176	2.12618	15.6806			16.6828			15.6806			16.6828			15.6806			16.6828
Sample	Sample Osteogenic	Chimpanzee	Chimpanzee Osteogenic	C3	C3 Osteogenic	C3649	C3649 Osteogenic	C3649 Osteogenic - GAPDH	Osteogenic	GAPDH	1	C3O2	study-collection-qPCR-C3 - plate1	2020-09-01	Emilie Briscoe	18.2401	2.12618	15.6806			16.6828			15.6806			16.6828			15.6806			16.6828
Sample	Sample Osteogenic	Chimpanzee	Chimpanzee Osteogenic	C3	C3 Osteogenic	C3649	C3649 Osteogenic	C3649 Osteogenic - GAPDH	Osteogenic	GAPDH	2	C3O2	study-collection-qPCR-C3 - plate1	2020-09-01	Emilie Briscoe	17.4187	2.12618	15.6806			16.6828			15.6806			16.6828			15.6806			16.6828
Sample	Sample Osteogenic	Chimpanzee	Chimpanzee Osteogenic	C3	C3 Osteogenic	C3649	C3649 Osteogenic	C3649 Osteogenic - GAPDH	Osteogenic	GAPDH	3	C3O2	study-collection-qPCR-C3 - plate1	2020-09-01	Emilie Briscoe	17.7256	2.12618	15.6806			16.6828			15.6806			16.6828			15.6806			16.6828
Sample	Sample iPSC	Chimpanzee	Chimpanzee iPSC	C3	C3 iPSC	C3649	C3649 iPSC	C3649 iPSC - GAPDH	iPSC	GAPDH	1	C3I2	study-collection-qPCR-C3 - plate2	2020-09-03	Emilie Briscoe	17.4014	2.14541	16.3412			16.5554			16.3412			16.5554			16.3412			16.5554
Sample	Sample iPSC	Chimpanzee	Chimpanzee iPSC	C3	C3 iPSC	C3649	C3649 iPSC	C3649 iPSC - GAPDH	iPSC	GAPDH	2	C3I2	study-collection-qPCR-C3 - plate2	2020-09-03	Emilie Briscoe	15.7363	2.14541	16.3412			16.5554			16.3412			16.5554			16.3412			16.5554
Sample	Sample iPSC	Chimpanzee	Chimpanzee iPSC	C3	C3 iPSC	C3649	C3649 iPSC	C3649 iPSC - GAPDH	iPSC	GAPDH	3	C3I2	study-collection-qPCR-C3 - plate2	2020-09-03	Emilie Briscoe	15.886	2.14541	16.3412			16.5554			16.3412			16.5554			16.3412			16.5554
Sample	Sample MSC	Chimpanzee	Chimpanzee MSC	C3	C3 MSC	C3649	C3649 MSC	C3649 MSC - GAPDH	MSC	GAPDH	1	C3M2	study-collection-qPCR-C3 - plate2	2020-09-03	Emilie Briscoe	17.2584	2.14541	16.3412			16.5554			16.3412			16.5554			16.3412			16.5554
Sample	Sample MSC	Chimpanzee	Chimpanzee MSC	C3	C3 MSC	C3649	C3649 MSC	C3649 MSC - GAPDH	MSC	GAPDH	2	C3M2	study-collection-qPCR-C3 - plate2	2020-09-03	Emilie Briscoe	16.0366	2.14541	16.3412			16.5554			16.3412			16.5554			16.3412			16.5554
Sample	Sample MSC	Chimpanzee	Chimpanzee MSC	C3	C3 MSC	C3649	C3649 MSC	C3649 MSC - GAPDH	MSC	GAPDH	3	C3M2	study-collection-qPCR-C3 - plate2	2020-09-03	Emilie Briscoe	16.3713	2.14541	16.3412			16.5554			16.3412			16.5554			16.3412			16.5554
Sample	Sample Adipogenic	Chimpanzee	Chimpanzee Adipogenic	C3	C3 Adipogenic	C3649	C3649 Adipogenic	C3649 Adipogenic - GAPDH	Adipogenic	GAPDH	1	C3A2	study-collection-qPCR-C3 - plate2	2020-09-03	Emilie Briscoe	16.9643	2.14541	16.3412			16.5554			16.3412			16.5554			16.3412			16.5554
Sample	Sample Adipogenic	Chimpanzee	Chimpanzee Adipogenic	C3	C3 Adipogenic	C3649	C3649 Adipogenic	C3649 Adipogenic - GAPDH	Adipogenic	GAPDH	2	C3A2	study-collection-qPCR-C3 - plate2	2020-09-03	Emilie Briscoe	15.5609	2.14541	16.3412			16.5554			16.3412			16.5554			16.3412			16.5554
Sample	Sample Adipogenic	Chimpanzee	Chimpanzee Adipogenic	C3	C3 Adipogenic	C3649	C3649 Adipogenic	C3649 Adipogenic - GAPDH	Adipogenic	GAPDH	3	C3A2	study-collection-qPCR-C3 - plate2	2020-09-03	Emilie Briscoe	15.886	2.14541	16.3412			16.5554			16.3412			16.5554			16.3412			16.5554
Sample	Sample Chondrogenic	Chimpanzee	Chimpanzee Chondrogenic	C3	C3 Chondrogenic	C3649	C3649 Chondrogenic	C3649 Chondrogenic - GAPDH	Chondrogenic	GAPDH	1	C3C2	study-collection-qPCR-C3 - plate2	2020-09-03	Emilie Briscoe	20.5826	2.14541	16.3412			16.5554			16.3412			16.5554			16.3412			16.5554
Sample	Sample Chondrogenic	Chimpanzee	Chimpanzee Chondrogenic	C3	C3 Chondrogenic	C3649	C3649 Chondrogenic	C3649 Chondrogenic - GAPDH	Chondrogenic	GAPDH	2	C3C2	study-collection-qPCR-C3 - plate2	2020-09-03	Emilie Briscoe	17.3472	2.14541	16.3412			16.5554			16.3412			16.5554			16.3412			16.5554
Sample	Sample Chondrogenic	Chimpanzee	Chimpanzee Chondrogenic	C3	C3 Chondrogenic	C3649	C3649 Chondrogenic	C3649 Chondrogenic - GAPDH	Chondrogenic	GAPDH	3	C3C2	study-collection-qPCR-C3 - plate2	2020-09-03	Emilie Briscoe	17.0424	2.14541	16.3412			16.5554			16.3412			16.5554			16.3412			16.5554
Sample	Sample Osteogenic	Chimpanzee	Chimpanzee Osteogenic	C3	C3 Osteogenic	C3649	C3649 Osteogenic	C3649 Osteogenic - GAPDH	Osteogenic	GAPDH	1	C3O2	study-collection-qPCR-C3 - plate2	2020-09-03	Emilie Briscoe	17.1934	2.14541	16.3412			16.5554			16.3412			16.5554			16.3412			16.5554
Sample	Sample Osteogenic	Chimpanzee	Chimpanzee Osteogenic	C3	C3 Osteogenic	C3649	C3649 Osteogenic	C3649 Osteogenic - GAPDH	Osteogenic	GAPDH	2	C3O2	study-collection-qPCR-C3 - plate2	2020-09-03	Emilie Briscoe	16.2387	2.14541	16.3412			16.5554			16.3412			16.5554			16.3412			16.5554
Sample	Sample Osteogenic	Chimpanzee	Chimpanzee Osteogenic	C3	C3 Osteogenic	C3649	C3649 Osteogenic	C3649 Osteogenic - GAPDH	Osteogenic	GAPDH	3	C3O2	study-collection-qPCR-C3 - plate2	2020-09-03	Emilie Briscoe	16.5485	2.14541	16.3412			16.5554			16.3412			16.5554			16.3412			16.5554
Sample	Sample iPSC	Chimpanzee	Chimpanzee iPSC	C4	C4 iPSC	C40210	C40210 iPSC	C40210 iPSC - GAPDH	iPSC	GAPDH	1	C4I2	study-collection-qPCR-C4 - plate1	2020-09-17	Emilie Briscoe	18.6331	2.05644	18.0042			15.9466			18.0042			15.9466			18.0042			15.9466
Sample	Sample iPSC	Chimpanzee	Chimpanzee iPSC	C4	C4 iPSC	C40210	C40210 iPSC	C40210 iPSC - GAPDH	iPSC	GAPDH	2	C4I2	study-collection-qPCR-C4 - plate1	2020-09-17	Emilie Briscoe	17.8378	2.05644	18.0042			15.9466			18.0042			15.9466			18.0042			15.9466
Sample	Sample iPSC	Chimpanzee	Chimpanzee iPSC	C4	C4 iPSC	C40210	C40210 iPSC	C40210 iPSC - GAPDH	iPSC	GAPDH	3	C4I2	study-collection-qPCR-C4 - plate1	2020-09-17	Emilie Briscoe	17.5417	2.05644	18.0042			15.9466			18.0042			15.9466			18.0042			15.9466
Sample	Sample MSC	Chimpanzee	Chimpanzee MSC	C4	C4 MSC	C40210	C40210 MSC	C40210 MSC - GAPDH	MSC	GAPDH	1	C4M2	study-collection-qPCR-C4 - plate1	2020-09-17	Emilie Briscoe	16.1815	2.05644	18.0042			15.9466			18.0042			15.9466			18.0042			15.9466
Sample	Sample MSC	Chimpanzee	Chimpanzee MSC	C4	C4 MSC	C40210	C40210 MSC	C40210 MSC - GAPDH	MSC	GAPDH	2	C4M2	study-collection-qPCR-C4 - plate1	2020-09-17	Emilie Briscoe	15.7406	2.05644	18.0042			15.9466			18.0042			15.9466			18.0042			15.9466
Sample	Sample MSC	Chimpanzee	Chimpanzee MSC	C4	C4 MSC	C40210	C40210 MSC	C40210 MSC - GAPDH	MSC	GAPDH	3	C4M2	study-collection-qPCR-C4 - plate1	2020-09-17	Emilie Briscoe	15.9177	2.05644	18.0042			15.9466			18.0042			15.9466			18.0042			15.9466
Sample	Sample Adipogenic	Chimpanzee	Chimpanzee Adipogenic	C4	C4 Adipogenic	C40210	C40210 Adipogenic	C40210 Adipogenic - GAPDH	Adipogenic	GAPDH	1	C4A2	study-collection-qPCR-C4 - plate1	2020-09-17	Emilie Briscoe	19.6691	2.05644	18.0042			15.9466			18.0042			15.9466			18.0042			15.9466
Sample	Sample Adipogenic	Chimpanzee	Chimpanzee Adipogenic	C4	C4 Adipogenic	C40210	C40210 Adipogenic	C40210 Adipogenic - GAPDH	Adipogenic	GAPDH	2	C4A2	study-collection-qPCR-C4 - plate1	2020-09-17	Emilie Briscoe	19.2461	2.05644	18.0042			15.9466			18.0042			15.9466			18.0042			15.9466
Sample	Sample Adipogenic	Chimpanzee	Chimpanzee Adipogenic	C4	C4 Adipogenic	C40210	C40210 Adipogenic	C40210 Adipogenic - GAPDH	Adipogenic	GAPDH	3	C4A2	study-collection-qPCR-C4 - plate1	2020-09-17	Emilie Briscoe	19.0659	2.05644	18.0042			15.9466			18.0042			15.9466			18.0042			15.9466
Sample	Sample Chondrogenic	Chimpanzee	Chimpanzee Chondrogenic	C4	C4 Chondrogenic	C40210	C40210 Chondrogenic	C40210 Chondrogenic - GAPDH	Chondrogenic	GAPDH	1	C4C2	study-collection-qPCR-C4 - plate1	2020-09-17	Emilie Briscoe	21.5535	2.05644	18.0042			15.9466			18.0042			15.9466			18.0042			15.9466
Sample	Sample Chondrogenic	Chimpanzee	Chimpanzee Chondrogenic	C4	C4 Chondrogenic	C40210	C40210 Chondrogenic	C40210 Chondrogenic - GAPDH	Chondrogenic	GAPDH	2	C4C2	study-collection-qPCR-C4 - plate1	2020-09-17	Emilie Briscoe	20.5503	2.05644	18.0042			15.9466			18.0042			15.9466			18.0042			15.9466
Sample	Sample Chondrogenic	Chimpanzee	Chimpanzee Chondrogenic	C4	C4 Chondrogenic	C40210	C40210 Chondrogenic	C40210 Chondrogenic - GAPDH	Chondrogenic	GAPDH	3	C4C2	study-collection-qPCR-C4 - plate1	2020-09-17	Emilie Briscoe	20.602	2.05644	18.0042			15.9466			18.0042			15.9466			18.0042			15.9466
Sample	Sample Osteogenic	Chimpanzee	Chimpanzee Osteogenic	C4	C4 Osteogenic	C40210	C40210 Osteogenic	C40210 Osteogenic - GAPDH	Osteogenic	GAPDH	1	C4O2	study-collection-qPCR-C4 - plate1	2020-09-17	Emilie Briscoe	18.4075	2.05644	18.0042			15.9466			18.0042			15.9466			18.0042			15.9466
Sample	Sample Osteogenic	Chimpanzee	Chimpanzee Osteogenic	C4	C4 Osteogenic	C40210	C40210 Osteogenic	C40210 Osteogenic - GAPDH	Osteogenic	GAPDH	2	C4O2	study-collection-qPCR-C4 - plate1	2020-09-17	Emilie Briscoe	18.3911	2.05644	18.0042			15.9466			18.0042			15.9466			18.0042			15.9466
Sample	Sample Osteogenic	Chimpanzee	Chimpanzee Osteogenic	C4	C4 Osteogenic	C40210	C40210 Osteogenic	C40210 Osteogenic - GAPDH	Osteogenic	GAPDH	3	C4O2	study-collection-qPCR-C4 - plate1	2020-09-17	Emilie Briscoe	18.271	2.05644	18.0042			15.9466			18.0042			15.9466			18.0042			15.9466
Sample	Sample iPSC	Chimpanzee	Chimpanzee iPSC	C4	C4 iPSC	C40210	C40210 iPSC	C40210 iPSC - GAPDH	iPSC	GAPDH	1	C4I2	study-collection-qPCR-C4 - plate2	2020-09-22	Emilie Briscoe	18.0544	2.21794	16.5406			16.6857			16.5406			16.6857			16.5406			16.6857
Sample	Sample iPSC	Chimpanzee	Chimpanzee iPSC	C4	C4 iPSC	C40210	C40210 iPSC	C40210 iPSC - GAPDH	iPSC	GAPDH	2	C4I2	study-collection-qPCR-C4 - plate2	2020-09-22	Emilie Briscoe	15.9536	2.21794	16.5406			16.6857			16.5406			16.6857			16.5406			16.6857
Sample	Sample iPSC	Chimpanzee	Chimpanzee iPSC	C4	C4 iPSC	C40210	C40210 iPSC	C40210 iPSC - GAPDH	iPSC	GAPDH	3	C4I2	study-collection-qPCR-C4 - plate2	2020-09-22	Emilie Briscoe	15.6138	2.21794	16.5406			16.6857			16.5406			16.6857			16.5406			16.6857
Sample	Sample MSC	Chimpanzee	Chimpanzee MSC	C4	C4 MSC	C40210	C40210 MSC	C40210 MSC - GAPDH	MSC	GAPDH	1	C4M2	study-collection-qPCR-C4 - plate2	2020-09-22	Emilie Briscoe	18.0255	2.21794	16.5406			16.6857			16.5406			16.6857			16.5406			16.6857
Sample	Sample MSC	Chimpanzee	Chimpanzee MSC	C4	C4 MSC	C40210	C40210 MSC	C40210 MSC - GAPDH	MSC	GAPDH	2	C4M2	study-collection-qPCR-C4 - plate2	2020-09-22	Emilie Briscoe	15.9639	2.21794	16.5406			16.6857			16.5406			16.6857			16.5406			16.6857
Sample	Sample MSC	Chimpanzee	Chimpanzee MSC	C4	C4 MSC	C40210	C40210 MSC	C40210 MSC - GAPDH	MSC	GAPDH	3	C4M2	study-collection-qPCR-C4 - plate2	2020-09-22	Emilie Briscoe	16.0675	2.21794	16.5406			16.6857			16.5406			16.6857			16.5406			16.6857
Sample	Sample Adipogenic	Chimpanzee	Chimpanzee Adipogenic	C4	C4 Adipogenic	C40210	C40210 Adipogenic	C40210 Adipogenic - GAPDH	Adipogenic	GAPDH	1	C4A2	study-collection-qPCR-C4 - plate2	2020-09-22	Emilie Briscoe	17.7703	2.21794	16.5406			16.6857			16.5406			16.6857			16.5406			16.6857
Sample	Sample Adipogenic	Chimpanzee	Chimpanzee Adipogenic	C4	C4 Adipogenic	C40210	C40210 Adipogenic	C40210 Adipogenic - GAPDH	Adipogenic	GAPDH	2	C4A2	study-collection-qPCR-C4 - plate2	2020-09-22	Emilie Briscoe	16.8806	2.21794	16.5406			16.6857			16.5406			16.6857			16.5406			16.6857
Sample	Sample Adipogenic	Chimpanzee	Chimpanzee Adipogenic	C4	C4 Adipogenic	C40210	C40210 Adipogenic	C40210 Adipogenic - GAPDH	Adipogenic	GAPDH	3	C4A2	study-collection-qPCR-C4 - plate2	2020-09-22	Emilie Briscoe	17.0082	2.21794	16.5406			16.6857			16.5406			16.6857			16.5406			16.6857
Sample	Sample Chondrogenic	Chimpanzee	Chimpanzee Chondrogenic	C4	C4 Chondrogenic	C40210	C40210 Chondrogenic	C40210 Chondrogenic - GAPDH	Chondrogenic	GAPDH	1	C4C2	study-collection-qPCR-C4 - plate2	2020-09-22	Emilie Briscoe	20.0282	2.21794	16.5406			16.6857			16.5406			16.6857			16.5406			16.6857
Sample	Sample Chondrogenic	Chimpanzee	Chimpanzee Chondrogenic	C4	C4 Chondrogenic	C40210	C40210 Chondrogenic	C40210 Chondrogenic - GAPDH	Chondrogenic	GAPDH	2	C4C2	study-collection-qPCR-C4 - plate2	2020-09-22	Emilie Briscoe	18.7956	2.21794	16.5406			16.6857			16.5406			16.6857			16.5406			16.6857
Sample	Sample Chondrogenic	Chimpanzee	Chimpanzee Chondrogenic	C4	C4 Chondrogenic	C40210	C40210 Chondrogenic	C40210 Chondrogenic - GAPDH	Chondrogenic	GAPDH	3	C4C2	study-collection-qPCR-C4 - plate2	2020-09-22	Emilie Briscoe	18.4223	2.21794	16.5406			16.6857			16.5406			16.6857			16.5406			16.6857
Sample	Sample Osteogenic	Chimpanzee	Chimpanzee Osteogenic	C4	C4 Osteogenic	C40210	C40210 Osteogenic	C40210 Osteogenic - GAPDH	Osteogenic	GAPDH	1	C4O2	study-collection-qPCR-C4 - plate2	2020-09-22	Emilie Briscoe	19.7183	2.21794	16.5406			16.6857			16.5406			16.6857			16.5406			16.6857
Sample	Sample Osteogenic	Chimpanzee	Chimpanzee Osteogenic	C4	C4 Osteogenic	C40210	C40210 Osteogenic	C40210 Osteogenic - GAPDH	Osteogenic	GAPDH	2	C4O2	study-collection-qPCR-C4 - plate2	2020-09-22	Emilie Briscoe	19.0727	2.21794	16.5406			16.6857			16.5406			16.6857			16.5406			16.6857
Sample	Sample Osteogenic	Chimpanzee	Chimpanzee Osteogenic	C4	C4 Osteogenic	C40210	C40210 Osteogenic	C40210 Osteogenic - GAPDH	Osteogenic	GAPDH	3	C4O2	study-collection-qPCR-C4 - plate2	2020-09-22	Emilie Briscoe	18.8454	2.21794	16.5406			16.6857			16.5406			16.6857			16.5406			16.6857
Sample	Sample iPSC	Chimpanzee	Chimpanzee iPSC	C5	C5 iPSC	C40280	C40280 iPSC	C40280 iPSC - GAPDH	iPSC	GAPDH	1	C5I2	study-collection-qPCR-C5 - plate1	2020-09-30	Emilie Briscoe	16.8867	2.3371	16.4408			18.066			16.4408			18.066			16.4408			18.066
Sample	Sample iPSC	Chimpanzee	Chimpanzee iPSC	C5	C5 iPSC	C40280	C40280 iPSC	C40280 iPSC - GAPDH	iPSC	GAPDH	2	C5I2	study-collection-qPCR-C5 - plate1	2020-09-30	Emilie Briscoe	16.2878	2.3371	16.4408			18.066			16.4408			18.066			16.4408			18.066
Sample	Sample iPSC	Chimpanzee	Chimpanzee iPSC	C5	C5 iPSC	C40280	C40280 iPSC	C40280 iPSC - GAPDH	iPSC	GAPDH	3	C5I2	study-collection-qPCR-C5 - plate1	2020-09-30	Emilie Briscoe	16.1477	2.3371	16.4408			18.066			16.4408			18.066			16.4408			18.066
Sample	Sample MSC	Chimpanzee	Chimpanzee MSC	C5	C5 MSC	C40280	C40280 MSC	C40280 MSC - GAPDH	MSC	GAPDH	1	C5M2	study-collection-qPCR-C5 - plate1	2020-09-30	Emilie Briscoe	18.121	2.3371	16.4408			18.066			16.4408			18.066			16.4408			18.066
Sample	Sample MSC	Chimpanzee	Chimpanzee MSC	C5	C5 MSC	C40280	C40280 MSC	C40280 MSC - GAPDH	MSC	GAPDH	2	C5M2	study-collection-qPCR-C5 - plate1	2020-09-30	Emilie Briscoe	18.023	2.3371	16.4408			18.066			16.4408			18.066			16.4408			18.066
Sample	Sample MSC	Chimpanzee	Chimpanzee MSC	C5	C5 MSC	C40280	C40280 MSC	C40280 MSC - GAPDH	MSC	GAPDH	3	C5M2	study-collection-qPCR-C5 - plate1	2020-09-30	Emilie Briscoe	18.054	2.3371	16.4408			18.066			16.4408			18.066			16.4408			18.066
Sample	Sample Adipogenic	Chimpanzee	Chimpanzee Adipogenic	C5	C5 Adipogenic	C40280	C40280 Adipogenic	C40280 Adipogenic - GAPDH	Adipogenic	GAPDH	1	C5A2	study-collection-qPCR-C5 - plate1	2020-09-30	Emilie Briscoe	19.9624	2.3371	16.4408			18.066			16.4408			18.066			16.4408			18.066
Sample	Sample Adipogenic	Chimpanzee	Chimpanzee Adipogenic	C5	C5 Adipogenic	C40280	C40280 Adipogenic	C40280 Adipogenic - GAPDH	Adipogenic	GAPDH	2	C5A2	study-collection-qPCR-C5 - plate1	2020-09-30	Emilie Briscoe	18.1869	2.3371	16.4408			18.066			16.4408			18.066			16.4408			18.066
Sample	Sample Adipogenic	Chimpanzee	Chimpanzee Adipogenic	C5	C5 Adipogenic	C40280	C40280 Adipogenic	C40280 Adipogenic - GAPDH	Adipogenic	GAPDH	3	C5A2	study-collection-qPCR-C5 - plate1	2020-09-30	Emilie Briscoe	19.6467	2.3371	16.4408			18.066			16.4408			18.066			16.4408			18.066
Sample	Sample Chondrogenic	Chimpanzee	Chimpanzee Chondrogenic	C5	C5 Chondrogenic	C40280	C40280 Chondrogenic	C40280 Chondrogenic - GAPDH	Chondrogenic	GAPDH	1	C5C2	study-collection-qPCR-C5 - plate1	2020-09-30	Emilie Briscoe	20.2948	2.3371	16.4408			18.066			16.4408			18.066			16.4408			18.066
Sample	Sample Chondrogenic	Chimpanzee	Chimpanzee Chondrogenic	C5	C5 Chondrogenic	C40280	C40280 Chondrogenic	C40280 Chondrogenic - GAPDH	Chondrogenic	GAPDH	2	C5C2	study-collection-qPCR-C5 - plate1	2020-09-30	Emilie Briscoe	18.6609	2.3371	16.4408			18.066			16.4408			18.066			16.4408			18.066
Sample	Sample Chondrogenic	Chimpanzee	Chimpanzee Chondrogenic	C5	C5 Chondrogenic	C40280	C40280 Chondrogenic	C40280 Chondrogenic - GAPDH	Chondrogenic	GAPDH	3	C5C2	study-collection-qPCR-C5 - plate1	2020-09-30	Emilie Briscoe	18.347	2.3371	16.4408			18.066			16.4408			18.066			16.4408			18.066
Sample	Sample Osteogenic	Chimpanzee	Chimpanzee Osteogenic	C5	C5 Osteogenic	C40280	C40280 Osteogenic	C40280 Osteogenic - GAPDH	Osteogenic	GAPDH	1	C5O2	study-collection-qPCR-C5 - plate1	2020-09-30	Emilie Briscoe	21.7547	2.3371	16.4408			18.066			16.4408			18.066			16.4408			18.066
Sample	Sample Osteogenic	Chimpanzee	Chimpanzee Osteogenic	C5	C5 Osteogenic	C40280	C40280 Osteogenic	C40280 Osteogenic - GAPDH	Osteogenic	GAPDH	2	C5O2	study-collection-qPCR-C5 - plate1	2020-09-30	Emilie Briscoe	21.4076	2.3371	16.4408			18.066			16.4408			18.066			16.4408			18.066
Sample	Sample Osteogenic	Chimpanzee	Chimpanzee Osteogenic	C5	C5 Osteogenic	C40280	C40280 Osteogenic	C40280 Osteogenic - GAPDH	Osteogenic	GAPDH	3	C5O2	study-collection-qPCR-C5 - plate1	2020-09-30	Emilie Briscoe	21.3928	2.3371	16.4408			18.066			16.4408			18.066			16.4408			18.066
Sample	Sample iPSC	Chimpanzee	Chimpanzee iPSC	C5	C5 iPSC	C40280	C40280 iPSC	C40280 iPSC - GAPDH	iPSC	GAPDH	1	C5I2	study-collection-qPCR-C5 - plate2	2020-10-06	Emilie Briscoe	16.5308	2.04301	16.3657			16.6185			16.3657			16.6185			16.3657			16.6185
Sample	Sample iPSC	Chimpanzee	Chimpanzee iPSC	C5	C5 iPSC	C40280	C40280 iPSC	C40280 iPSC - GAPDH	iPSC	GAPDH	2	C5I2	study-collection-qPCR-C5 - plate2	2020-10-06	Emilie Briscoe	16.3974	2.04301	16.3657			16.6185			16.3657			16.6185			16.3657			16.6185
Sample	Sample iPSC	Chimpanzee	Chimpanzee iPSC	C5	C5 iPSC	C40280	C40280 iPSC	C40280 iPSC - GAPDH	iPSC	GAPDH	3	C5I2	study-collection-qPCR-C5 - plate2	2020-10-06	Emilie Briscoe	16.169	2.04301	16.3657			16.6185			16.3657			16.6185			16.3657			16.6185
Sample	Sample MSC	Chimpanzee	Chimpanzee MSC	C5	C5 MSC	C40280	C40280 MSC	C40280 MSC - GAPDH	MSC	GAPDH	1	C5M2	study-collection-qPCR-C5 - plate2	2020-10-06	Emilie Briscoe	16.5133	2.04301	16.3657			16.6185			16.3657			16.6185			16.3657			16.6185
Sample	Sample MSC	Chimpanzee	Chimpanzee MSC	C5	C5 MSC	C40280	C40280 MSC	C40280 MSC - GAPDH	MSC	GAPDH	2	C5M2	study-collection-qPCR-C5 - plate2	2020-10-06	Emilie Briscoe	16.6727	2.04301	16.3657			16.6185			16.3657			16.6185			16.3657			16.6185
Sample	Sample MSC	Chimpanzee	Chimpanzee MSC	C5	C5 MSC	C40280	C40280 MSC	C40280 MSC - GAPDH	MSC	GAPDH	3	C5M2	study-collection-qPCR-C5 - plate2	2020-10-06	Emilie Briscoe	16.6693	2.04301	16.3657			16.6185			16.3657			16.6185			16.3657			16.6185
Sample	Sample Adipogenic	Chimpanzee	Chimpanzee Adipogenic	C5	C5 Adipogenic	C40280	C40280 Adipogenic	C40280 Adipogenic - GAPDH	Adipogenic	GAPDH	1	C5A2	study-collection-qPCR-C5 - plate2	2020-10-06	Emilie Briscoe	19.1347	2.04301	16.3657			16.6185			16.3657			16.6185			16.3657			16.6185
Sample	Sample Adipogenic	Chimpanzee	Chimpanzee Adipogenic	C5	C5 Adipogenic	C40280	C40280 Adipogenic	C40280 Adipogenic - GAPDH	Adipogenic	GAPDH	2	C5A2	study-collection-qPCR-C5 - plate2	2020-10-06	Emilie Briscoe	18.9013	2.04301	16.3657			16.6185			16.3657			16.6185			16.3657			16.6185
Sample	Sample Adipogenic	Chimpanzee	Chimpanzee Adipogenic	C5	C5 Adipogenic	C40280	C40280 Adipogenic	C40280 Adipogenic - GAPDH	Adipogenic	GAPDH	3	C5A2	study-collection-qPCR-C5 - plate2	2020-10-06	Emilie Briscoe	18.6518	2.04301	16.3657			16.6185			16.3657			16.6185			16.3657			16.6185
Sample	Sample Chondrogenic	Chimpanzee	Chimpanzee Chondrogenic	C5	C5 Chondrogenic	C40280	C40280 Chondrogenic	C40280 Chondrogenic - GAPDH	Chondrogenic	GAPDH	1	C5C2	study-collection-qPCR-C5 - plate2	2020-10-06	Emilie Briscoe	19.0561	2.04301	16.3657			16.6185			16.3657			16.6185			16.3657			16.6185
Sample	Sample Chondrogenic	Chimpanzee	Chimpanzee Chondrogenic	C5	C5 Chondrogenic	C40280	C40280 Chondrogenic	C40280 Chondrogenic - GAPDH	Chondrogenic	GAPDH	2	C5C2	study-collection-qPCR-C5 - plate2	2020-10-06	Emilie Briscoe	18.0473	2.04301	16.3657			16.6185			16.3657			16.6185			16.3657			16.6185
Sample	Sample Chondrogenic	Chimpanzee	Chimpanzee Chondrogenic	C5	C5 Chondrogenic	C40280	C40280 Chondrogenic	C40280 Chondrogenic - GAPDH	Chondrogenic	GAPDH	3	C5C2	study-collection-qPCR-C5 - plate2	2020-10-06	Emilie Briscoe	18.1101	2.04301	16.3657			16.6185			16.3657			16.6185			16.3657			16.6185
Sample	Sample Osteogenic	Chimpanzee	Chimpanzee Osteogenic	C5	C5 Osteogenic	C40280	C40280 Osteogenic	C40280 Osteogenic - GAPDH	Osteogenic	GAPDH	1	C5O2	study-collection-qPCR-C5 - plate2	2020-10-06	Emilie Briscoe	19.3876	2.04301	16.3657			16.6185			16.3657			16.6185			16.3657			16.6185
Sample	Sample Osteogenic	Chimpanzee	Chimpanzee Osteogenic	C5	C5 Osteogenic	C40280	C40280 Osteogenic	C40280 Osteogenic - GAPDH	Osteogenic	GAPDH	2	C5O2	study-collection-qPCR-C5 - plate2	2020-10-06	Emilie Briscoe	19.4309	2.04301	16.3657			16.6185			16.3657			16.6185			16.3657			16.6185
Sample	Sample Osteogenic	Chimpanzee	Chimpanzee Osteogenic	C5	C5 Osteogenic	C40280	C40280 Osteogenic	C40280 Osteogenic - GAPDH	Osteogenic	GAPDH	3	C5O2	study-collection-qPCR-C5 - plate2	2020-10-06	Emilie Briscoe	18.8937	2.04301	16.3657			16.6185			16.3657			16.6185			16.3657			16.6185
Sample	Sample iPSC	Chimpanzee	Chimpanzee iPSC	C6	C6 iPSC	C3624	C3624 iPSC	C3624 iPSC - GAPDH	iPSC	GAPDH	1	C6I2	study-collection-qPCR-C6 - plate1	2020-10-16	Emilie Briscoe	18.3043	2.1286	16.5231			18.1146			16.5231			18.1146			16.5231			18.1146
Sample	Sample iPSC	Chimpanzee	Chimpanzee iPSC	C6	C6 iPSC	C3624	C3624 iPSC	C3624 iPSC - GAPDH	iPSC	GAPDH	2	C6I2	study-collection-qPCR-C6 - plate1	2020-10-16	Emilie Briscoe	15.8627	2.1286	16.5231			18.1146			16.5231			18.1146			16.5231			18.1146
Sample	Sample iPSC	Chimpanzee	Chimpanzee iPSC	C6	C6 iPSC	C3624	C3624 iPSC	C3624 iPSC - GAPDH	iPSC	GAPDH	3	C6I2	study-collection-qPCR-C6 - plate1	2020-10-16	Emilie Briscoe	15.4022	2.1286	16.5231			18.1146			16.5231			18.1146			16.5231			18.1146
Sample	Sample MSC	Chimpanzee	Chimpanzee MSC	C6	C6 MSC	C3624	C3624 MSC	C3624 MSC - GAPDH	MSC	GAPDH	1	C6M2	study-collection-qPCR-C6 - plate1	2020-10-16	Emilie Briscoe	19.4435	2.1286	16.5231			18.1146			16.5231			18.1146			16.5231			18.1146
Sample	Sample MSC	Chimpanzee	Chimpanzee MSC	C6	C6 MSC	C3624	C3624 MSC	C3624 MSC - GAPDH	MSC	GAPDH	2	C6M2	study-collection-qPCR-C6 - plate1	2020-10-16	Emilie Briscoe	17.5846	2.1286	16.5231			18.1146			16.5231			18.1146			16.5231			18.1146
Sample	Sample MSC	Chimpanzee	Chimpanzee MSC	C6	C6 MSC	C3624	C3624 MSC	C3624 MSC - GAPDH	MSC	GAPDH	3	C6M2	study-collection-qPCR-C6 - plate1	2020-10-16	Emilie Briscoe	17.3157	2.1286	16.5231			18.1146			16.5231			18.1146			16.5231			18.1146
Sample	Sample Adipogenic	Chimpanzee	Chimpanzee Adipogenic	C6	C6 Adipogenic	C3624	C3624 Adipogenic	C3624 Adipogenic - GAPDH	Adipogenic	GAPDH	1	C6A1	study-collection-qPCR-C6 - plate1	2020-10-16	Emilie Briscoe	17.0153	2.1286	16.5231			18.1146			16.5231			18.1146			16.5231			18.1146
Sample	Sample Adipogenic	Chimpanzee	Chimpanzee Adipogenic	C6	C6 Adipogenic	C3624	C3624 Adipogenic	C3624 Adipogenic - GAPDH	Adipogenic	GAPDH	2	C6A1	study-collection-qPCR-C6 - plate1	2020-10-16	Emilie Briscoe	15.6823	2.1286	16.5231			18.1146			16.5231			18.1146			16.5231			18.1146
Sample	Sample Adipogenic	Chimpanzee	Chimpanzee Adipogenic	C6	C6 Adipogenic	C3624	C3624 Adipogenic	C3624 Adipogenic - GAPDH	Adipogenic	GAPDH	3	C6A1	study-collection-qPCR-C6 - plate1	2020-10-16	Emilie Briscoe	14.8743	2.1286	16.5231			18.1146			16.5231			18.1146			16.5231			18.1146
Sample	Sample Osteogenic	Chimpanzee	Chimpanzee Osteogenic	C6	C6 Osteogenic	C3624	C3624 Osteogenic	C3624 Osteogenic - GAPDH	Osteogenic	GAPDH	1	C6O2	study-collection-qPCR-C6 - plate1	2020-10-16	Emilie Briscoe	20.0281	2.1286	16.5231			18.1146			16.5231			18.1146			16.5231			18.1146
Sample	Sample Osteogenic	Chimpanzee	Chimpanzee Osteogenic	C6	C6 Osteogenic	C3624	C3624 Osteogenic	C3624 Osteogenic - GAPDH	Osteogenic	GAPDH	2	C6O2	study-collection-qPCR-C6 - plate1	2020-10-16	Emilie Briscoe	17.9603	2.1286	16.5231			18.1146			16.5231			18.1146			16.5231			18.1146
Sample	Sample Osteogenic	Chimpanzee	Chimpanzee Osteogenic	C6	C6 Osteogenic	C3624	C3624 Osteogenic	C3624 Osteogenic - GAPDH	Osteogenic	GAPDH	3	C6O2	study-collection-qPCR-C6 - plate1	2020-10-16	Emilie Briscoe	17.0009	2.1286	16.5231			18.1146			16.5231			18.1146			16.5231			18.1146
Sample	Sample iPSC	Chimpanzee	Chimpanzee iPSC	C6	C6 iPSC	C3624	C3624 iPSC	C3624 iPSC - GAPDH	iPSC	GAPDH	1	C6I2	study-collection-qPCR-C6 - plate2	2020-10-21	Emilie Briscoe	18.5488	1.98185	17.408			16.6309			17.408			16.6309			17.408			16.6309
Sample	Sample iPSC	Chimpanzee	Chimpanzee iPSC	C6	C6 iPSC	C3624	C3624 iPSC	C3624 iPSC - GAPDH	iPSC	GAPDH	2	C6I2	study-collection-qPCR-C6 - plate2	2020-10-21	Emilie Briscoe	17.1063	1.98185	17.408			16.6309			17.408			16.6309			17.408			16.6309
Sample	Sample iPSC	Chimpanzee	Chimpanzee iPSC	C6	C6 iPSC	C3624	C3624 iPSC	C3624 iPSC - GAPDH	iPSC	GAPDH	3	C6I2	study-collection-qPCR-C6 - plate2	2020-10-21	Emilie Briscoe	16.5689	1.98185	17.408			16.6309			17.408			16.6309			17.408			16.6309
Sample	Sample MSC	Chimpanzee	Chimpanzee MSC	C6	C6 MSC	C3624	C3624 MSC	C3624 MSC - GAPDH	MSC	GAPDH	1	C6M2	study-collection-qPCR-C6 - plate2	2020-10-21	Emilie Briscoe	17.6012	1.98185	17.408			16.6309			17.408			16.6309			17.408			16.6309
Sample	Sample MSC	Chimpanzee	Chimpanzee MSC	C6	C6 MSC	C3624	C3624 MSC	C3624 MSC - GAPDH	MSC	GAPDH	2	C6M2	study-collection-qPCR-C6 - plate2	2020-10-21	Emilie Briscoe	16.4814	1.98185	17.408			16.6309			17.408			16.6309			17.408			16.6309
Sample	Sample MSC	Chimpanzee	Chimpanzee MSC	C6	C6 MSC	C3624	C3624 MSC	C3624 MSC - GAPDH	MSC	GAPDH	3	C6M2	study-collection-qPCR-C6 - plate2	2020-10-21	Emilie Briscoe	15.8101	1.98185	17.408			16.6309			17.408			16.6309			17.408			16.6309
Sample	Sample Adipogenic	Chimpanzee	Chimpanzee Adipogenic	C6	C6 Adipogenic	C3624	C3624 Adipogenic	C3624 Adipogenic - GAPDH	Adipogenic	GAPDH	1	C6A1	study-collection-qPCR-C6 - plate2	2020-10-21	Emilie Briscoe	18.531	1.98185	17.408			16.6309			17.408			16.6309			17.408			16.6309
Sample	Sample Adipogenic	Chimpanzee	Chimpanzee Adipogenic	C6	C6 Adipogenic	C3624	C3624 Adipogenic	C3624 Adipogenic - GAPDH	Adipogenic	GAPDH	2	C6A1	study-collection-qPCR-C6 - plate2	2020-10-21	Emilie Briscoe	16.5877	1.98185	17.408			16.6309			17.408			16.6309			17.408			16.6309
Sample	Sample Adipogenic	Chimpanzee	Chimpanzee Adipogenic	C6	C6 Adipogenic	C3624	C3624 Adipogenic	C3624 Adipogenic - GAPDH	Adipogenic	GAPDH	3	C6A1	study-collection-qPCR-C6 - plate2	2020-10-21	Emilie Briscoe	16.3815	1.98185	17.408			16.6309			17.408			16.6309			17.408			16.6309
Sample	Sample Osteogenic	Chimpanzee	Chimpanzee Osteogenic	C6	C6 Osteogenic	C3624	C3624 Osteogenic	C3624 Osteogenic - GAPDH	Osteogenic	GAPDH	1	C6O2	study-collection-qPCR-C6 - plate2	2020-10-21	Emilie Briscoe	19.3258	1.98185	17.408			16.6309			17.408			16.6309			17.408			16.6309
Sample	Sample Osteogenic	Chimpanzee	Chimpanzee Osteogenic	C6	C6 Osteogenic	C3624	C3624 Osteogenic	C3624 Osteogenic - GAPDH	Osteogenic	GAPDH	2	C6O2	study-collection-qPCR-C6 - plate2	2020-10-21	Emilie Briscoe	18.5875	1.98185	17.408			16.6309			17.408			16.6309			17.408			16.6309
Sample	Sample Osteogenic	Chimpanzee	Chimpanzee Osteogenic	C6	C6 Osteogenic	C3624	C3624 Osteogenic	C3624 Osteogenic - GAPDH	Osteogenic	GAPDH	3	C6O2	study-collection-qPCR-C6 - plate2	2020-10-21	Emilie Briscoe	17.671	1.98185	17.408			16.6309			17.408			16.6309			17.408			16.6309
Sample	Sample iPSC	Human	Human iPSC	H1	H1 iPSC	H23555	H23555 iPSC	H23555 iPSC - GUSB	iPSC	GUSB	1	H1I2	study-collection-qPCR-H1	2020-06-24	Emilie Briscoe	24.5521	1.96048							24.0833			25.8485
Sample	Sample iPSC	Human	Human iPSC	H1	H1 iPSC	H23555	H23555 iPSC	H23555 iPSC - GUSB	iPSC	GUSB	2	H1I2	study-collection-qPCR-H1	2020-06-24	Emilie Briscoe	23.9055	1.96048							24.0833			25.8485
Sample	Sample iPSC	Human	Human iPSC	H1	H1 iPSC	H23555	H23555 iPSC	H23555 iPSC - GUSB	iPSC	GUSB	3	H1I2	study-collection-qPCR-H1	2020-06-24	Emilie Briscoe	23.7925	1.96048							24.0833			25.8485
Sample	Sample MSC	Human	Human MSC	H1	H1 MSC	H23555	H23555 MSC	H23555 MSC - GUSB	MSC	GUSB	1	H1M2	study-collection-qPCR-H1	2020-06-24	Emilie Briscoe	26.283	1.96048							24.0833			25.8485
Sample	Sample MSC	Human	Human MSC	H1	H1 MSC	H23555	H23555 MSC	H23555 MSC - GUSB	MSC	GUSB	2	H1M2	study-collection-qPCR-H1	2020-06-24	Emilie Briscoe	25.7934	1.96048							24.0833			25.8485
Sample	Sample MSC	Human	Human MSC	H1	H1 MSC	H23555	H23555 MSC	H23555 MSC - GUSB	MSC	GUSB	3	H1M2	study-collection-qPCR-H1	2020-06-24	Emilie Briscoe	25.4689	1.96048							24.0833			25.8485
Sample	Sample Adipogenic	Human	Human Adipogenic	H1	H1 Adipogenic	H23555	H23555 Adipogenic	H23555 Adipogenic - GUSB	Adipogenic	GUSB	1	H1A1	study-collection-qPCR-H1	2020-06-24	Emilie Briscoe	24.8403	1.96048							24.0833			25.8485
Sample	Sample Adipogenic	Human	Human Adipogenic	H1	H1 Adipogenic	H23555	H23555 Adipogenic	H23555 Adipogenic - GUSB	Adipogenic	GUSB	2	H1A1	study-collection-qPCR-H1	2020-06-24	Emilie Briscoe	24.2626	1.96048							24.0833			25.8485
Sample	Sample Chondrogenic	Human	Human Chondrogenic	H1	H1 Chondrogenic	H23555	H23555 Chondrogenic	H23555 Chondrogenic - GUSB	Chondrogenic	GUSB	1	H1C2	study-collection-qPCR-H1	2020-06-24	Emilie Briscoe	25.108	1.96048							24.0833			25.8485
Sample	Sample Chondrogenic	Human	Human Chondrogenic	H1	H1 Chondrogenic	H23555	H23555 Chondrogenic	H23555 Chondrogenic - GUSB	Chondrogenic	GUSB	2	H1C2	study-collection-qPCR-H1	2020-06-24	Emilie Briscoe	24.387	1.96048							24.0833			25.8485
Sample	Sample Chondrogenic	Human	Human Chondrogenic	H1	H1 Chondrogenic	H23555	H23555 Chondrogenic	H23555 Chondrogenic - GUSB	Chondrogenic	GUSB	3	H1C2	study-collection-qPCR-H1	2020-06-24	Emilie Briscoe	23.8303	1.96048							24.0833			25.8485
Sample	Sample iPSC	Human	Human iPSC	H1-r2	H1-r2 iPSC	H23555	H23555 iPSC	H23555 iPSC - GUSB	iPSC	GUSB		H1Ir2	study-collection-qPCR-H1r - plate1	2020-10-26	Emilie Briscoe	25.5967	2.06082	24.4423			24.6137			24.4423			24.6137			24.4423			24.6137
Sample	Sample iPSC	Human	Human iPSC	H1-r2	H1-r2 iPSC	H23555	H23555 iPSC	H23555 iPSC - GUSB	iPSC	GUSB		H1Ir2	study-collection-qPCR-H1r - plate1	2020-10-26	Emilie Briscoe	24.0699	2.06082	24.4423			24.6137			24.4423			24.6137			24.4423			24.6137
Sample	Sample iPSC	Human	Human iPSC	H1-r2	H1-r2 iPSC	H23555	H23555 iPSC	H23555 iPSC - GUSB	iPSC	GUSB		H1Ir2	study-collection-qPCR-H1r - plate1	2020-10-26	Emilie Briscoe	23.6603	2.06082	24.4423			24.6137			24.4423			24.6137			24.4423			24.6137
Sample	Sample MSC	Human	Human MSC	H1-r2	H1-r2 MSC	H23555	H23555 MSC	H23555 MSC - GUSB	MSC	GUSB		H1Mr2	study-collection-qPCR-H1r - plate1	2020-10-26	Emilie Briscoe	25.3546	2.06082	24.4423			24.6137			24.4423			24.6137			24.4423			24.6137
Sample	Sample MSC	Human	Human MSC	H1-r2	H1-r2 MSC	H23555	H23555 MSC	H23555 MSC - GUSB	MSC	GUSB		H1Mr2	study-collection-qPCR-H1r - plate1	2020-10-26	Emilie Briscoe	24.1193	2.06082	24.4423			24.6137			24.4423			24.6137			24.4423			24.6137
Sample	Sample MSC	Human	Human MSC	H1-r2	H1-r2 MSC	H23555	H23555 MSC	H23555 MSC - GUSB	MSC	GUSB		H1Mr2	study-collection-qPCR-H1r - plate1	2020-10-26	Emilie Briscoe	24.3671	2.06082	24.4423			24.6137			24.4423			24.6137			24.4423			24.6137
Sample	Sample Adipogenic	Human	Human Adipogenic	H1-r2	H1-r2 Adipogenic	H23555	H23555 Adipogenic	H23555 Adipogenic - GUSB	Adipogenic	GUSB		H1Ar2	study-collection-qPCR-H1r - plate1	2020-10-26	Emilie Briscoe	26.0003	2.06082	24.4423			24.6137			24.4423			24.6137			24.4423			24.6137
Sample	Sample Adipogenic	Human	Human Adipogenic	H1-r2	H1-r2 Adipogenic	H23555	H23555 Adipogenic	H23555 Adipogenic - GUSB	Adipogenic	GUSB		H1Ar2	study-collection-qPCR-H1r - plate1	2020-10-26	Emilie Briscoe	23.9818	2.06082	24.4423			24.6137			24.4423			24.6137			24.4423			24.6137
Sample	Sample Adipogenic	Human	Human Adipogenic	H1-r2	H1-r2 Adipogenic	H23555	H23555 Adipogenic	H23555 Adipogenic - GUSB	Adipogenic	GUSB		H1Ar2	study-collection-qPCR-H1r - plate1	2020-10-26	Emilie Briscoe	25.015	2.06082	24.4423			24.6137			24.4423			24.6137			24.4423			24.6137
Sample	Sample Chondrogenic	Human	Human Chondrogenic	H1-r2	H1-r2 Chondrogenic	H23555	H23555 Chondrogenic	H23555 Chondrogenic - GUSB	Chondrogenic	GUSB		H1Cr2	study-collection-qPCR-H1r - plate1	2020-10-26	Emilie Briscoe	32.2002	2.06082	24.4423			24.6137			24.4423			24.6137			24.4423			24.6137
Sample	Sample Chondrogenic	Human	Human Chondrogenic	H1-r2	H1-r2 Chondrogenic	H23555	H23555 Chondrogenic	H23555 Chondrogenic - GUSB	Chondrogenic	GUSB		H1Cr2	study-collection-qPCR-H1r - plate1	2020-10-26	Emilie Briscoe	32.3108	2.06082	24.4423			24.6137			24.4423			24.6137			24.4423			24.6137
Sample	Sample Chondrogenic	Human	Human Chondrogenic	H1-r2	H1-r2 Chondrogenic	H23555	H23555 Chondrogenic	H23555 Chondrogenic - GUSB	Chondrogenic	GUSB		H1Cr2	study-collection-qPCR-H1r - plate1	2020-10-26	Emilie Briscoe	32.9575	2.06082	24.4423			24.6137			24.4423			24.6137			24.4423			24.6137
Sample	Sample Osteogenic	Human	Human Osteogenic	H1-r2	H1-r2 Osteogenic	H23555	H23555 Osteogenic	H23555 Osteogenic - GUSB	Osteogenic	GUSB		H1Or2	study-collection-qPCR-H1r - plate1	2020-10-26	Emilie Briscoe	25.0496	2.06082	24.4423			24.6137			24.4423			24.6137			24.4423			24.6137
Sample	Sample Osteogenic	Human	Human Osteogenic	H1-r2	H1-r2 Osteogenic	H23555	H23555 Osteogenic	H23555 Osteogenic - GUSB	Osteogenic	GUSB		H1Or2	study-collection-qPCR-H1r - plate1	2020-10-26	Emilie Briscoe	24.2042	2.06082	24.4423			24.6137			24.4423			24.6137			24.4423			24.6137
Sample	Sample Osteogenic	Human	Human Osteogenic	H1-r2	H1-r2 Osteogenic	H23555	H23555 Osteogenic	H23555 Osteogenic - GUSB	Osteogenic	GUSB		H1Or2	study-collection-qPCR-H1r - plate1	2020-10-26	Emilie Briscoe	24.621	2.06082	24.4423			24.6137			24.4423			24.6137			24.4423			24.6137
Sample	Sample iPSC	Human	Human iPSC	H1-r2	H1-r2 iPSC	H23555	H23555 iPSC	H23555 iPSC - GUSB	iPSC	GUSB		H1Ir2	study-collection-qPCR-H1r - plate2	2020-10-28	Emilie Briscoe	25.9793	1.79351	24.3668			25.3586			24.3668			25.3586			24.3668			25.3586
Sample	Sample iPSC	Human	Human iPSC	H1-r2	H1-r2 iPSC	H23555	H23555 iPSC	H23555 iPSC - GUSB	iPSC	GUSB		H1Ir2	study-collection-qPCR-H1r - plate2	2020-10-28	Emilie Briscoe	24.0656	1.79351	24.3668			25.3586			24.3668			25.3586			24.3668			25.3586
Sample	Sample iPSC	Human	Human iPSC	H1-r2	H1-r2 iPSC	H23555	H23555 iPSC	H23555 iPSC - GUSB	iPSC	GUSB		H1Ir2	study-collection-qPCR-H1r - plate2	2020-10-28	Emilie Briscoe	23.0556	1.79351	24.3668			25.3586			24.3668			25.3586			24.3668			25.3586
Sample	Sample MSC	Human	Human MSC	H1-r2	H1-r2 MSC	H23555	H23555 MSC	H23555 MSC - GUSB	MSC	GUSB		H1Mr2	study-collection-qPCR-H1r - plate2	2020-10-28	Emilie Briscoe	25.8345	1.79351	24.3668			25.3586			24.3668			25.3586			24.3668			25.3586
Sample	Sample MSC	Human	Human MSC	H1-r2	H1-r2 MSC	H23555	H23555 MSC	H23555 MSC - GUSB	MSC	GUSB		H1Mr2	study-collection-qPCR-H1r - plate2	2020-10-28	Emilie Briscoe	24.8111	1.79351	24.3668			25.3586			24.3668			25.3586			24.3668			25.3586
Sample	Sample MSC	Human	Human MSC	H1-r2	H1-r2 MSC	H23555	H23555 MSC	H23555 MSC - GUSB	MSC	GUSB		H1Mr2	study-collection-qPCR-H1r - plate2	2020-10-28	Emilie Briscoe	25.4303	1.79351	24.3668			25.3586			24.3668			25.3586			24.3668			25.3586
Sample	Sample Adipogenic	Human	Human Adipogenic	H1-r2	H1-r2 Adipogenic	H23555	H23555 Adipogenic	H23555 Adipogenic - GUSB	Adipogenic	GUSB		H1Ar2	study-collection-qPCR-H1r - plate2	2020-10-28	Emilie Briscoe	26.6535	1.79351	24.3668			25.3586			24.3668			25.3586			24.3668			25.3586
Sample	Sample Adipogenic	Human	Human Adipogenic	H1-r2	H1-r2 Adipogenic	H23555	H23555 Adipogenic	H23555 Adipogenic - GUSB	Adipogenic	GUSB		H1Ar2	study-collection-qPCR-H1r - plate2	2020-10-28	Emilie Briscoe	26.1177	1.79351	24.3668			25.3586			24.3668			25.3586			24.3668			25.3586
Sample	Sample Adipogenic	Human	Human Adipogenic	H1-r2	H1-r2 Adipogenic	H23555	H23555 Adipogenic	H23555 Adipogenic - GUSB	Adipogenic	GUSB		H1Ar2	study-collection-qPCR-H1r - plate2	2020-10-28	Emilie Briscoe	25.6304	1.79351	24.3668			25.3586			24.3668			25.3586			24.3668			25.3586
Sample	Sample Chondrogenic	Human	Human Chondrogenic	H1-r2	H1-r2 Chondrogenic	H23555	H23555 Chondrogenic	H23555 Chondrogenic - GUSB	Chondrogenic	GUSB		H1Cr2	study-collection-qPCR-H1r - plate2	2020-10-28	Emilie Briscoe	33.2068	1.79351	24.3668			25.3586			24.3668			25.3586			24.3668			25.3586
Sample	Sample Chondrogenic	Human	Human Chondrogenic	H1-r2	H1-r2 Chondrogenic	H23555	H23555 Chondrogenic	H23555 Chondrogenic - GUSB	Chondrogenic	GUSB		H1Cr2	study-collection-qPCR-H1r - plate2	2020-10-28	Emilie Briscoe	32.7358	1.79351	24.3668			25.3586			24.3668			25.3586			24.3668			25.3586
Sample	Sample Chondrogenic	Human	Human Chondrogenic	H1-r2	H1-r2 Chondrogenic	H23555	H23555 Chondrogenic	H23555 Chondrogenic - GUSB	Chondrogenic	GUSB		H1Cr2	study-collection-qPCR-H1r - plate2	2020-10-28	Emilie Briscoe	32.3017	1.79351	24.3668			25.3586			24.3668			25.3586			24.3668			25.3586
Sample	Sample Osteogenic	Human	Human Osteogenic	H1-r2	H1-r2 Osteogenic	H23555	H23555 Osteogenic	H23555 Osteogenic - GUSB	Osteogenic	GUSB		H1Or2	study-collection-qPCR-H1r - plate2	2020-10-28	Emilie Briscoe	27.1143	1.79351	24.3668			25.3586			24.3668			25.3586			24.3668			25.3586
Sample	Sample Osteogenic	Human	Human Osteogenic	H1-r2	H1-r2 Osteogenic	H23555	H23555 Osteogenic	H23555 Osteogenic - GUSB	Osteogenic	GUSB		H1Or2	study-collection-qPCR-H1r - plate2	2020-10-28	Emilie Briscoe	25.693	1.79351	24.3668			25.3586			24.3668			25.3586			24.3668			25.3586
Sample	Sample Osteogenic	Human	Human Osteogenic	H1-r2	H1-r2 Osteogenic	H23555	H23555 Osteogenic	H23555 Osteogenic - GUSB	Osteogenic	GUSB		H1Or2	study-collection-qPCR-H1r - plate2	2020-10-28	Emilie Briscoe	25.5473	1.79351	24.3668			25.3586			24.3668			25.3586			24.3668			25.3586
Sample	Sample iPSC	Human	Human iPSC	H2	H2 iPSC	H20157	H20157 iPSC	H20157 iPSC - GUSB	iPSC	GUSB	1	H2I2	study-collection-qPCR-H2 - plate1	2020-07-28	Emilie Briscoe	25.2462	1.88911	24.9095			24.7581			24.9095			24.7581			24.9095			24.7581
Sample	Sample iPSC	Human	Human iPSC	H2	H2 iPSC	H20157	H20157 iPSC	H20157 iPSC - GUSB	iPSC	GUSB	2	H2I2	study-collection-qPCR-H2 - plate1	2020-07-28	Emilie Briscoe	24.7809	1.88911	24.9095			24.7581			24.9095			24.7581			24.9095			24.7581
Sample	Sample iPSC	Human	Human iPSC	H2	H2 iPSC	H20157	H20157 iPSC	H20157 iPSC - GUSB	iPSC	GUSB	3	H2I2	study-collection-qPCR-H2 - plate1	2020-07-28	Emilie Briscoe	24.7012	1.88911	24.9095			24.7581			24.9095			24.7581			24.9095			24.7581
Sample	Sample MSC	Human	Human MSC	H2	H2 MSC	H20157	H20157 MSC	H20157 MSC - GUSB	MSC	GUSB	1	H2M2	study-collection-qPCR-H2 - plate1	2020-07-28	Emilie Briscoe	25.3712	1.88911	24.9095			24.7581			24.9095			24.7581			24.9095			24.7581
Sample	Sample MSC	Human	Human MSC	H2	H2 MSC	H20157	H20157 MSC	H20157 MSC - GUSB	MSC	GUSB	2	H2M2	study-collection-qPCR-H2 - plate1	2020-07-28	Emilie Briscoe	24.0849	1.88911	24.9095			24.7581			24.9095			24.7581			24.9095			24.7581
Sample	Sample MSC	Human	Human MSC	H2	H2 MSC	H20157	H20157 MSC	H20157 MSC - GUSB	MSC	GUSB	3	H2M2	study-collection-qPCR-H2 - plate1	2020-07-28	Emilie Briscoe	24.8182	1.88911	24.9095			24.7581			24.9095			24.7581			24.9095			24.7581
Sample	Sample Adipogenic	Human	Human Adipogenic	H2	H2 Adipogenic	H20157	H20157 Adipogenic	H20157 Adipogenic - GUSB	Adipogenic	GUSB	1	H2A2	study-collection-qPCR-H2 - plate1	2020-07-28	Emilie Briscoe	25.8866	1.88911	24.9095			24.7581			24.9095			24.7581			24.9095			24.7581
Sample	Sample Adipogenic	Human	Human Adipogenic	H2	H2 Adipogenic	H20157	H20157 Adipogenic	H20157 Adipogenic - GUSB	Adipogenic	GUSB	2	H2A2	study-collection-qPCR-H2 - plate1	2020-07-28	Emilie Briscoe	25.9565	1.88911	24.9095			24.7581			24.9095			24.7581			24.9095			24.7581
Sample	Sample Adipogenic	Human	Human Adipogenic	H2	H2 Adipogenic	H20157	H20157 Adipogenic	H20157 Adipogenic - GUSB	Adipogenic	GUSB	3	H2A2	study-collection-qPCR-H2 - plate1	2020-07-28	Emilie Briscoe	25.6632	1.88911	24.9095			24.7581			24.9095			24.7581			24.9095			24.7581
Sample	Sample Chondrogenic	Human	Human Chondrogenic	H2	H2 Chondrogenic	H20157	H20157 Chondrogenic	H20157 Chondrogenic - GUSB	Chondrogenic	GUSB	1	H2C2	study-collection-qPCR-H2 - plate1	2020-07-28	Emilie Briscoe	30.9606	1.88911	24.9095			24.7581			24.9095			24.7581			24.9095			24.7581
Sample	Sample Chondrogenic	Human	Human Chondrogenic	H2	H2 Chondrogenic	H20157	H20157 Chondrogenic	H20157 Chondrogenic - GUSB	Chondrogenic	GUSB	2	H2C2	study-collection-qPCR-H2 - plate1	2020-07-28	Emilie Briscoe	29.9904	1.88911	24.9095			24.7581			24.9095			24.7581			24.9095			24.7581
Sample	Sample Chondrogenic	Human	Human Chondrogenic	H2	H2 Chondrogenic	H20157	H20157 Chondrogenic	H20157 Chondrogenic - GUSB	Chondrogenic	GUSB	3	H2C2	study-collection-qPCR-H2 - plate1	2020-07-28	Emilie Briscoe	29.7321	1.88911	24.9095			24.7581			24.9095			24.7581			24.9095			24.7581
Sample	Sample Osteogenic	Human	Human Osteogenic	H2	H2 Osteogenic	H20157	H20157 Osteogenic	H20157 Osteogenic - GUSB	Osteogenic	GUSB	1	H2O2	study-collection-qPCR-H2 - plate1	2020-07-28	Emilie Briscoe	26.655	1.88911	24.9095			24.7581			24.9095			24.7581			24.9095			24.7581
Sample	Sample Osteogenic	Human	Human Osteogenic	H2	H2 Osteogenic	H20157	H20157 Osteogenic	H20157 Osteogenic - GUSB	Osteogenic	GUSB	2	H2O2	study-collection-qPCR-H2 - plate1	2020-07-28	Emilie Briscoe	24.9985	1.88911	24.9095			24.7581			24.9095			24.7581			24.9095			24.7581
Sample	Sample Osteogenic	Human	Human Osteogenic	H2	H2 Osteogenic	H20157	H20157 Osteogenic	H20157 Osteogenic - GUSB	Osteogenic	GUSB	3	H2O2	study-collection-qPCR-H2 - plate1	2020-07-28	Emilie Briscoe	24.7258	1.88911	24.9095			24.7581			24.9095			24.7581			24.9095			24.7581
Sample	Sample iPSC	Human	Human iPSC	H2	H2 iPSC	H20157	H20157 iPSC	H20157 iPSC - GUSB	iPSC	GUSB	1	H2I2	study-collection-qPCR-H2 - plate2	2020-07-30	Emilie Briscoe	27.4303	1.88643	25.8608			25.5437			25.8608			25.5437			25.8608			25.5437
Sample	Sample iPSC	Human	Human iPSC	H2	H2 iPSC	H20157	H20157 iPSC	H20157 iPSC - GUSB	iPSC	GUSB	2	H2I2	study-collection-qPCR-H2 - plate2	2020-07-30	Emilie Briscoe	24.746	1.88643	25.8608			25.5437			25.8608			25.5437			25.8608			25.5437
Sample	Sample iPSC	Human	Human iPSC	H2	H2 iPSC	H20157	H20157 iPSC	H20157 iPSC - GUSB	iPSC	GUSB	3	H2I2	study-collection-qPCR-H2 - plate2	2020-07-30	Emilie Briscoe	25.406	1.88643	25.8608			25.5437			25.8608			25.5437			25.8608			25.5437
Sample	Sample MSC	Human	Human MSC	H2	H2 MSC	H20157	H20157 MSC	H20157 MSC - GUSB	MSC	GUSB	1	H2M2	study-collection-qPCR-H2 - plate2	2020-07-30	Emilie Briscoe	26.1943	1.88643	25.8608			25.5437			25.8608			25.5437			25.8608			25.5437
Sample	Sample MSC	Human	Human MSC	H2	H2 MSC	H20157	H20157 MSC	H20157 MSC - GUSB	MSC	GUSB	2	H2M2	study-collection-qPCR-H2 - plate2	2020-07-30	Emilie Briscoe	25.4215	1.88643	25.8608			25.5437			25.8608			25.5437			25.8608			25.5437
Sample	Sample MSC	Human	Human MSC	H2	H2 MSC	H20157	H20157 MSC	H20157 MSC - GUSB	MSC	GUSB	3	H2M2	study-collection-qPCR-H2 - plate2	2020-07-30	Emilie Briscoe	25.0152	1.88643	25.8608			25.5437			25.8608			25.5437			25.8608			25.5437
Sample	Sample Adipogenic	Human	Human Adipogenic	H2	H2 Adipogenic	H20157	H20157 Adipogenic	H20157 Adipogenic - GUSB	Adipogenic	GUSB	1	H2A2	study-collection-qPCR-H2 - plate2	2020-07-30	Emilie Briscoe	26.471	1.88643	25.8608			25.5437			25.8608			25.5437			25.8608			25.5437
Sample	Sample Adipogenic	Human	Human Adipogenic	H2	H2 Adipogenic	H20157	H20157 Adipogenic	H20157 Adipogenic - GUSB	Adipogenic	GUSB	2	H2A2	study-collection-qPCR-H2 - plate2	2020-07-30	Emilie Briscoe	26.9768	1.88643	25.8608			25.5437			25.8608			25.5437			25.8608			25.5437
Sample	Sample Adipogenic	Human	Human Adipogenic	H2	H2 Adipogenic	H20157	H20157 Adipogenic	H20157 Adipogenic - GUSB	Adipogenic	GUSB	3	H2A2	study-collection-qPCR-H2 - plate2	2020-07-30	Emilie Briscoe	26.0726	1.88643	25.8608			25.5437			25.8608			25.5437			25.8608			25.5437
Sample	Sample Chondrogenic	Human	Human Chondrogenic	H2	H2 Chondrogenic	H20157	H20157 Chondrogenic	H20157 Chondrogenic - GUSB	Chondrogenic	GUSB	1	H2C2	study-collection-qPCR-H2 - plate2	2020-07-30	Emilie Briscoe	31.0696	1.88643	25.8608			25.5437			25.8608			25.5437			25.8608			25.5437
Sample	Sample Chondrogenic	Human	Human Chondrogenic	H2	H2 Chondrogenic	H20157	H20157 Chondrogenic	H20157 Chondrogenic - GUSB	Chondrogenic	GUSB	2	H2C2	study-collection-qPCR-H2 - plate2	2020-07-30	Emilie Briscoe	29.983	1.88643	25.8608			25.5437			25.8608			25.5437			25.8608			25.5437
Sample	Sample Chondrogenic	Human	Human Chondrogenic	H2	H2 Chondrogenic	H20157	H20157 Chondrogenic	H20157 Chondrogenic - GUSB	Chondrogenic	GUSB	3	H2C2	study-collection-qPCR-H2 - plate2	2020-07-30	Emilie Briscoe	29.5138	1.88643	25.8608			25.5437			25.8608			25.5437			25.8608			25.5437
Sample	Sample Osteogenic	Human	Human Osteogenic	H2	H2 Osteogenic	H20157	H20157 Osteogenic	H20157 Osteogenic - GUSB	Osteogenic	GUSB	1	H2O2	study-collection-qPCR-H2 - plate2	2020-07-30	Emilie Briscoe	26.5153	1.88643	25.8608			25.5437			25.8608			25.5437			25.8608			25.5437
Sample	Sample Osteogenic	Human	Human Osteogenic	H2	H2 Osteogenic	H20157	H20157 Osteogenic	H20157 Osteogenic - GUSB	Osteogenic	GUSB	2	H2O2	study-collection-qPCR-H2 - plate2	2020-07-30	Emilie Briscoe	25.4152	1.88643	25.8608			25.5437			25.8608			25.5437			25.8608			25.5437
Sample	Sample Osteogenic	Human	Human Osteogenic	H2	H2 Osteogenic	H20157	H20157 Osteogenic	H20157 Osteogenic - GUSB	Osteogenic	GUSB	3	H2O2	study-collection-qPCR-H2 - plate2	2020-07-30	Emilie Briscoe	25.6445	1.88643	25.8608			25.5437			25.8608			25.5437			25.8608			25.5437
Sample	Sample iPSC	Human	Human iPSC	H3	H3 iPSC	H28126	H28126 iPSC	H28126 iPSC - GUSB	iPSC	GUSB	1	H3I2	study-collection-qPCR-H3 - plate1	2020-08-26	Emilie Briscoe	25.1119	2.10326	24.7349			24.6861			24.7349			24.6861			24.7349			24.6861
Sample	Sample iPSC	Human	Human iPSC	H3	H3 iPSC	H28126	H28126 iPSC	H28126 iPSC - GUSB	iPSC	GUSB	2	H3I2	study-collection-qPCR-H3 - plate1	2020-08-26	Emilie Briscoe	24.6143	2.10326	24.7349			24.6861			24.7349			24.6861			24.7349			24.6861
Sample	Sample iPSC	Human	Human iPSC	H3	H3 iPSC	H28126	H28126 iPSC	H28126 iPSC - GUSB	iPSC	GUSB	3	H3I2	study-collection-qPCR-H3 - plate1	2020-08-26	Emilie Briscoe	24.4785	2.10326	24.7349			24.6861			24.7349			24.6861			24.7349			24.6861
Sample	Sample MSC	Human	Human MSC	H3	H3 MSC	H28126	H28126 MSC	H28126 MSC - GUSB	MSC	GUSB	1	H3M1	study-collection-qPCR-H3 - plate1	2020-08-26	Emilie Briscoe	25.3688	2.10326	24.7349			24.6861			24.7349			24.6861			24.7349			24.6861
Sample	Sample MSC	Human	Human MSC	H3	H3 MSC	H28126	H28126 MSC	H28126 MSC - GUSB	MSC	GUSB	2	H3M1	study-collection-qPCR-H3 - plate1	2020-08-26	Emilie Briscoe	24.5138	2.10326	24.7349			24.6861			24.7349			24.6861			24.7349			24.6861
Sample	Sample MSC	Human	Human MSC	H3	H3 MSC	H28126	H28126 MSC	H28126 MSC - GUSB	MSC	GUSB	3	H3M1	study-collection-qPCR-H3 - plate1	2020-08-26	Emilie Briscoe	24.1757	2.10326	24.7349			24.6861			24.7349			24.6861			24.7349			24.6861
Sample	Sample Adipogenic	Human	Human Adipogenic	H3	H3 Adipogenic	H28126	H28126 Adipogenic	H28126 Adipogenic - GUSB	Adipogenic	GUSB	1	H3A1	study-collection-qPCR-H3 - plate1	2020-08-26	Emilie Briscoe	28.3267	2.10326	24.7349			24.6861			24.7349			24.6861			24.7349			24.6861
Sample	Sample Adipogenic	Human	Human Adipogenic	H3	H3 Adipogenic	H28126	H28126 Adipogenic	H28126 Adipogenic - GUSB	Adipogenic	GUSB	2	H3A1	study-collection-qPCR-H3 - plate1	2020-08-26	Emilie Briscoe	26.535	2.10326	24.7349			24.6861			24.7349			24.6861			24.7349			24.6861
Sample	Sample Adipogenic	Human	Human Adipogenic	H3	H3 Adipogenic	H28126	H28126 Adipogenic	H28126 Adipogenic - GUSB	Adipogenic	GUSB	3	H3A1	study-collection-qPCR-H3 - plate1	2020-08-26	Emilie Briscoe	25.9586	2.10326	24.7349			24.6861			24.7349			24.6861			24.7349			24.6861
Sample	Sample Osteogenic	Human	Human Osteogenic	H3	H3 Osteogenic	H28126	H28126 Osteogenic	H28126 Osteogenic - GUSB	Osteogenic	GUSB	1	H3O2	study-collection-qPCR-H3 - plate1	2020-08-26	Emilie Briscoe	26.0914	2.10326	24.7349			24.6861			24.7349			24.6861			24.7349			24.6861
Sample	Sample Osteogenic	Human	Human Osteogenic	H3	H3 Osteogenic	H28126	H28126 Osteogenic	H28126 Osteogenic - GUSB	Osteogenic	GUSB	2	H3O2	study-collection-qPCR-H3 - plate1	2020-08-26	Emilie Briscoe	25.1685	2.10326	24.7349			24.6861			24.7349			24.6861			24.7349			24.6861
Sample	Sample Osteogenic	Human	Human Osteogenic	H3	H3 Osteogenic	H28126	H28126 Osteogenic	H28126 Osteogenic - GUSB	Osteogenic	GUSB	3	H3O2	study-collection-qPCR-H3 - plate1	2020-08-26	Emilie Briscoe	24.9943	2.10326	24.7349			24.6861			24.7349			24.6861			24.7349			24.6861
Sample	Sample iPSC	Human	Human iPSC	H3	H3 iPSC	H28126	H28126 iPSC	H28126 iPSC - GUSB	iPSC	GUSB	1	H3I2	study-collection-qPCR-H3 - plate2	2020-08-28	Emilie Briscoe	25.6354	1.96537	25.4388			25.7178			25.4388			25.7178			25.4388			25.7178
Sample	Sample iPSC	Human	Human iPSC	H3	H3 iPSC	H28126	H28126 iPSC	H28126 iPSC - GUSB	iPSC	GUSB	2	H3I2	study-collection-qPCR-H3 - plate2	2020-08-28	Emilie Briscoe	25.6259	1.96537	25.4388			25.7178			25.4388			25.7178			25.4388			25.7178
Sample	Sample iPSC	Human	Human iPSC	H3	H3 iPSC	H28126	H28126 iPSC	H28126 iPSC - GUSB	iPSC	GUSB	3	H3I2	study-collection-qPCR-H3 - plate2	2020-08-28	Emilie Briscoe	25.0551	1.96537	25.4388			25.7178			25.4388			25.7178			25.4388			25.7178
Sample	Sample MSC	Human	Human MSC	H3	H3 MSC	H28126	H28126 MSC	H28126 MSC - GUSB	MSC	GUSB	1	H3M1	study-collection-qPCR-H3 - plate2	2020-08-28	Emilie Briscoe	26.4574	1.96537	25.4388			25.7178			25.4388			25.7178			25.4388			25.7178
Sample	Sample MSC	Human	Human MSC	H3	H3 MSC	H28126	H28126 MSC	H28126 MSC - GUSB	MSC	GUSB	2	H3M1	study-collection-qPCR-H3 - plate2	2020-08-28	Emilie Briscoe	25.4969	1.96537	25.4388			25.7178			25.4388			25.7178			25.4388			25.7178
Sample	Sample MSC	Human	Human MSC	H3	H3 MSC	H28126	H28126 MSC	H28126 MSC - GUSB	MSC	GUSB	3	H3M1	study-collection-qPCR-H3 - plate2	2020-08-28	Emilie Briscoe	25.1993	1.96537	25.4388			25.7178			25.4388			25.7178			25.4388			25.7178
Sample	Sample Adipogenic	Human	Human Adipogenic	H3	H3 Adipogenic	H28126	H28126 Adipogenic	H28126 Adipogenic - GUSB	Adipogenic	GUSB	1	H3A1	study-collection-qPCR-H3 - plate2	2020-08-28	Emilie Briscoe	27.9833	1.96537	25.4388			25.7178			25.4388			25.7178			25.4388			25.7178
Sample	Sample Adipogenic	Human	Human Adipogenic	H3	H3 Adipogenic	H28126	H28126 Adipogenic	H28126 Adipogenic - GUSB	Adipogenic	GUSB	2	H3A1	study-collection-qPCR-H3 - plate2	2020-08-28	Emilie Briscoe	26.3796	1.96537	25.4388			25.7178			25.4388			25.7178			25.4388			25.7178
Sample	Sample Adipogenic	Human	Human Adipogenic	H3	H3 Adipogenic	H28126	H28126 Adipogenic	H28126 Adipogenic - GUSB	Adipogenic	GUSB	3	H3A1	study-collection-qPCR-H3 - plate2	2020-08-28	Emilie Briscoe	26.3171	1.96537	25.4388			25.7178			25.4388			25.7178			25.4388			25.7178
Sample	Sample Osteogenic	Human	Human Osteogenic	H3	H3 Osteogenic	H28126	H28126 Osteogenic	H28126 Osteogenic - GUSB	Osteogenic	GUSB	1	H3O2	study-collection-qPCR-H3 - plate2	2020-08-28	Emilie Briscoe	26.2594	1.96537	25.4388			25.7178			25.4388			25.7178			25.4388			25.7178
Sample	Sample Osteogenic	Human	Human Osteogenic	H3	H3 Osteogenic	H28126	H28126 Osteogenic	H28126 Osteogenic - GUSB	Osteogenic	GUSB	2	H3O2	study-collection-qPCR-H3 - plate2	2020-08-28	Emilie Briscoe	25.1577	1.96537	25.4388			25.7178			25.4388			25.7178			25.4388			25.7178
Sample	Sample Osteogenic	Human	Human Osteogenic	H3	H3 Osteogenic	H28126	H28126 Osteogenic	H28126 Osteogenic - GUSB	Osteogenic	GUSB	3	H3O2	study-collection-qPCR-H3 - plate2	2020-08-28	Emilie Briscoe	25.0483	1.96537	25.4388			25.7178			25.4388			25.7178			25.4388			25.7178
Sample	Sample iPSC	Human	Human iPSC	H4	H4 iPSC	H28834	H28834 iPSC	H28834 iPSC - GUSB	iPSC	GUSB	1	H4I2	study-collection-qPCR-H4 - plate1	2020-09-11	Emilie Briscoe	24.1777	1.96944	23.905			25.8025			23.905			25.8025			23.905			25.8025
Sample	Sample iPSC	Human	Human iPSC	H4	H4 iPSC	H28834	H28834 iPSC	H28834 iPSC - GUSB	iPSC	GUSB	2	H4I2	study-collection-qPCR-H4 - plate1	2020-09-11	Emilie Briscoe	23.9189	1.96944	23.905			25.8025			23.905			25.8025			23.905			25.8025
Sample	Sample iPSC	Human	Human iPSC	H4	H4 iPSC	H28834	H28834 iPSC	H28834 iPSC - GUSB	iPSC	GUSB	3	H4I2	study-collection-qPCR-H4 - plate1	2020-09-11	Emilie Briscoe	23.6183	1.96944	23.905			25.8025			23.905			25.8025			23.905			25.8025
Sample	Sample MSC	Human	Human MSC	H4	H4 MSC	H28834	H28834 MSC	H28834 MSC - GUSB	MSC	GUSB	1	H4M2	study-collection-qPCR-H4 - plate1	2020-09-11	Emilie Briscoe	26.2814	1.96944	23.905			25.8025			23.905			25.8025			23.905			25.8025
Sample	Sample MSC	Human	Human MSC	H4	H4 MSC	H28834	H28834 MSC	H28834 MSC - GUSB	MSC	GUSB	2	H4M2	study-collection-qPCR-H4 - plate1	2020-09-11	Emilie Briscoe	26.1022	1.96944	23.905			25.8025			23.905			25.8025			23.905			25.8025
Sample	Sample MSC	Human	Human MSC	H4	H4 MSC	H28834	H28834 MSC	H28834 MSC - GUSB	MSC	GUSB	3	H4M2	study-collection-qPCR-H4 - plate1	2020-09-11	Emilie Briscoe	25.0238	1.96944	23.905			25.8025			23.905			25.8025			23.905			25.8025
Sample	Sample Adipogenic	Human	Human Adipogenic	H4	H4 Adipogenic	H28834	H28834 Adipogenic	H28834 Adipogenic - GUSB	Adipogenic	GUSB	1	H4A2	study-collection-qPCR-H4 - plate1	2020-09-11	Emilie Briscoe	26.2732	1.96944	23.905			25.8025			23.905			25.8025			23.905			25.8025
Sample	Sample Adipogenic	Human	Human Adipogenic	H4	H4 Adipogenic	H28834	H28834 Adipogenic	H28834 Adipogenic - GUSB	Adipogenic	GUSB	2	H4A2	study-collection-qPCR-H4 - plate1	2020-09-11	Emilie Briscoe	25.923	1.96944	23.905			25.8025			23.905			25.8025			23.905			25.8025
Sample	Sample Adipogenic	Human	Human Adipogenic	H4	H4 Adipogenic	H28834	H28834 Adipogenic	H28834 Adipogenic - GUSB	Adipogenic	GUSB	3	H4A2	study-collection-qPCR-H4 - plate1	2020-09-11	Emilie Briscoe	25.6365	1.96944	23.905			25.8025			23.905			25.8025			23.905			25.8025
Sample	Sample Chondrogenic	Human	Human Chondrogenic	H4	H4 Chondrogenic	H28834	H28834 Chondrogenic	H28834 Chondrogenic - GUSB	Chondrogenic	GUSB	1	H4C2	study-collection-qPCR-H4 - plate1	2020-09-11	Emilie Briscoe	27.5101	1.96944	23.905			25.8025			23.905			25.8025			23.905			25.8025
Sample	Sample Chondrogenic	Human	Human Chondrogenic	H4	H4 Chondrogenic	H28834	H28834 Chondrogenic	H28834 Chondrogenic - GUSB	Chondrogenic	GUSB	2	H4C2	study-collection-qPCR-H4 - plate1	2020-09-11	Emilie Briscoe	26.6806	1.96944	23.905			25.8025			23.905			25.8025			23.905			25.8025
Sample	Sample Chondrogenic	Human	Human Chondrogenic	H4	H4 Chondrogenic	H28834	H28834 Chondrogenic	H28834 Chondrogenic - GUSB	Chondrogenic	GUSB	3	H4C2	study-collection-qPCR-H4 - plate1	2020-09-11	Emilie Briscoe	26.3106	1.96944	23.905			25.8025			23.905			25.8025			23.905			25.8025
Sample	Sample Osteogenic	Human	Human Osteogenic	H4	H4 Osteogenic	H28834	H28834 Osteogenic	H28834 Osteogenic - GUSB	Osteogenic	GUSB	1	H4O2	study-collection-qPCR-H4 - plate1	2020-09-11	Emilie Briscoe	25.6754	1.96944	23.905			25.8025			23.905			25.8025			23.905			25.8025
Sample	Sample Osteogenic	Human	Human Osteogenic	H4	H4 Osteogenic	H28834	H28834 Osteogenic	H28834 Osteogenic - GUSB	Osteogenic	GUSB	2	H4O2	study-collection-qPCR-H4 - plate1	2020-09-11	Emilie Briscoe	25.5896	1.96944	23.905			25.8025			23.905			25.8025			23.905			25.8025
Sample	Sample Osteogenic	Human	Human Osteogenic	H4	H4 Osteogenic	H28834	H28834 Osteogenic	H28834 Osteogenic - GUSB	Osteogenic	GUSB	3	H4O2	study-collection-qPCR-H4 - plate1	2020-09-11	Emilie Briscoe	25.1457	1.96944	23.905			25.8025			23.905			25.8025			23.905			25.8025
Sample	Sample iPSC	Human	Human iPSC	H4	H4 iPSC	H28834	H28834 iPSC	H28834 iPSC - GUSB	iPSC	GUSB	1	H4I2	study-collection-qPCR-H4 - plate2	2020-09-15	Emilie Briscoe	24.8503	1.86019	24.1338			26.1252			24.1338			26.1252			24.1338			26.1252
Sample	Sample iPSC	Human	Human iPSC	H4	H4 iPSC	H28834	H28834 iPSC	H28834 iPSC - GUSB	iPSC	GUSB	2	H4I2	study-collection-qPCR-H4 - plate2	2020-09-15	Emilie Briscoe	23.7422	1.86019	24.1338			26.1252			24.1338			26.1252			24.1338			26.1252
Sample	Sample iPSC	Human	Human iPSC	H4	H4 iPSC	H28834	H28834 iPSC	H28834 iPSC - GUSB	iPSC	GUSB	3	H4I2	study-collection-qPCR-H4 - plate2	2020-09-15	Emilie Briscoe	23.809	1.86019	24.1338			26.1252			24.1338			26.1252			24.1338			26.1252
Sample	Sample MSC	Human	Human MSC	H4	H4 MSC	H28834	H28834 MSC	H28834 MSC - GUSB	MSC	GUSB	1	H4M2	study-collection-qPCR-H4 - plate2	2020-09-15	Emilie Briscoe	27.3082	1.86019	24.1338			26.1252			24.1338			26.1252			24.1338			26.1252
Sample	Sample MSC	Human	Human MSC	H4	H4 MSC	H28834	H28834 MSC	H28834 MSC - GUSB	MSC	GUSB	2	H4M2	study-collection-qPCR-H4 - plate2	2020-09-15	Emilie Briscoe	25.3716	1.86019	24.1338			26.1252			24.1338			26.1252			24.1338			26.1252
Sample	Sample MSC	Human	Human MSC	H4	H4 MSC	H28834	H28834 MSC	H28834 MSC - GUSB	MSC	GUSB	3	H4M2	study-collection-qPCR-H4 - plate2	2020-09-15	Emilie Briscoe	25.6957	1.86019	24.1338			26.1252			24.1338			26.1252			24.1338			26.1252
Sample	Sample Adipogenic	Human	Human Adipogenic	H4	H4 Adipogenic	H28834	H28834 Adipogenic	H28834 Adipogenic - GUSB	Adipogenic	GUSB	1	H4A2	study-collection-qPCR-H4 - plate2	2020-09-15	Emilie Briscoe	26.0445	1.86019	24.1338			26.1252			24.1338			26.1252			24.1338			26.1252
Sample	Sample Adipogenic	Human	Human Adipogenic	H4	H4 Adipogenic	H28834	H28834 Adipogenic	H28834 Adipogenic - GUSB	Adipogenic	GUSB	2	H4A2	study-collection-qPCR-H4 - plate2	2020-09-15	Emilie Briscoe	25.6288	1.86019	24.1338			26.1252			24.1338			26.1252			24.1338			26.1252
Sample	Sample Adipogenic	Human	Human Adipogenic	H4	H4 Adipogenic	H28834	H28834 Adipogenic	H28834 Adipogenic - GUSB	Adipogenic	GUSB	3	H4A2	study-collection-qPCR-H4 - plate2	2020-09-15	Emilie Briscoe	25.8811	1.86019	24.1338			26.1252			24.1338			26.1252			24.1338			26.1252
Sample	Sample Chondrogenic	Human	Human Chondrogenic	H4	H4 Chondrogenic	H28834	H28834 Chondrogenic	H28834 Chondrogenic - GUSB	Chondrogenic	GUSB	1	H4C2	study-collection-qPCR-H4 - plate2	2020-09-15	Emilie Briscoe	27.2177	1.86019	24.1338			26.1252			24.1338			26.1252			24.1338			26.1252
Sample	Sample Chondrogenic	Human	Human Chondrogenic	H4	H4 Chondrogenic	H28834	H28834 Chondrogenic	H28834 Chondrogenic - GUSB	Chondrogenic	GUSB	2	H4C2	study-collection-qPCR-H4 - plate2	2020-09-15	Emilie Briscoe	26.9182	1.86019	24.1338			26.1252			24.1338			26.1252			24.1338			26.1252
Sample	Sample Chondrogenic	Human	Human Chondrogenic	H4	H4 Chondrogenic	H28834	H28834 Chondrogenic	H28834 Chondrogenic - GUSB	Chondrogenic	GUSB	3	H4C2	study-collection-qPCR-H4 - plate2	2020-09-15	Emilie Briscoe	26.9143	1.86019	24.1338			26.1252			24.1338			26.1252			24.1338			26.1252
Sample	Sample Osteogenic	Human	Human Osteogenic	H4	H4 Osteogenic	H28834	H28834 Osteogenic	H28834 Osteogenic - GUSB	Osteogenic	GUSB	1	H4O2	study-collection-qPCR-H4 - plate2	2020-09-15	Emilie Briscoe	26.6957	1.86019	24.1338			26.1252			24.1338			26.1252			24.1338			26.1252
Sample	Sample Osteogenic	Human	Human Osteogenic	H4	H4 Osteogenic	H28834	H28834 Osteogenic	H28834 Osteogenic - GUSB	Osteogenic	GUSB	2	H4O2	study-collection-qPCR-H4 - plate2	2020-09-15	Emilie Briscoe	24.6846	1.86019	24.1338			26.1252			24.1338			26.1252			24.1338			26.1252
Sample	Sample Osteogenic	Human	Human Osteogenic	H4	H4 Osteogenic	H28834	H28834 Osteogenic	H28834 Osteogenic - GUSB	Osteogenic	GUSB	3	H4O2	study-collection-qPCR-H4 - plate2	2020-09-15	Emilie Briscoe	25.0462	1.86019	24.1338			26.1252			24.1338			26.1252			24.1338			26.1252
Sample	Sample iPSC	Human	Human iPSC	H5	H5 iPSC	H21792	H21792 iPSC	H21792 iPSC - GUSB	iPSC	GUSB	1	H5I2	study-collection-qPCR-H5 - plate1	2020-09-25	Emilie Briscoe	25.388	2.06984	24.7703			25.7008			24.7703			25.7008			24.7703			25.7008
Sample	Sample iPSC	Human	Human iPSC	H5	H5 iPSC	H21792	H21792 iPSC	H21792 iPSC - GUSB	iPSC	GUSB	2	H5I2	study-collection-qPCR-H5 - plate1	2020-09-25	Emilie Briscoe	24.7271	2.06984	24.7703			25.7008			24.7703			25.7008			24.7703			25.7008
Sample	Sample iPSC	Human	Human iPSC	H5	H5 iPSC	H21792	H21792 iPSC	H21792 iPSC - GUSB	iPSC	GUSB	3	H5I2	study-collection-qPCR-H5 - plate1	2020-09-25	Emilie Briscoe	24.1957	2.06984	24.7703			25.7008			24.7703			25.7008			24.7703			25.7008
Sample	Sample MSC	Human	Human MSC	H5	H5 MSC	H21792	H21792 MSC	H21792 MSC - GUSB	MSC	GUSB	1	H5M2	study-collection-qPCR-H5 - plate1	2020-09-25	Emilie Briscoe	26.6609	2.06984	24.7703			25.7008			24.7703			25.7008			24.7703			25.7008
Sample	Sample MSC	Human	Human MSC	H5	H5 MSC	H21792	H21792 MSC	H21792 MSC - GUSB	MSC	GUSB	2	H5M2	study-collection-qPCR-H5 - plate1	2020-09-25	Emilie Briscoe	25.2569	2.06984	24.7703			25.7008			24.7703			25.7008			24.7703			25.7008
Sample	Sample MSC	Human	Human MSC	H5	H5 MSC	H21792	H21792 MSC	H21792 MSC - GUSB	MSC	GUSB	3	H5M2	study-collection-qPCR-H5 - plate1	2020-09-25	Emilie Briscoe	25.1847	2.06984	24.7703			25.7008			24.7703			25.7008			24.7703			25.7008
Sample	Sample Osteogenic	Human	Human Osteogenic	H5	H5 Osteogenic	H21792	H21792 Osteogenic	H21792 Osteogenic - GUSB	Osteogenic	GUSB	1	H5O2	study-collection-qPCR-H5 - plate1	2020-09-25	Emilie Briscoe	27.1264	2.06984	24.7703			25.7008			24.7703			25.7008			24.7703			25.7008
Sample	Sample Osteogenic	Human	Human Osteogenic	H5	H5 Osteogenic	H21792	H21792 Osteogenic	H21792 Osteogenic - GUSB	Osteogenic	GUSB	2	H5O2	study-collection-qPCR-H5 - plate1	2020-09-25	Emilie Briscoe	26.8249	2.06984	24.7703			25.7008			24.7703			25.7008			24.7703			25.7008
Sample	Sample Osteogenic	Human	Human Osteogenic	H5	H5 Osteogenic	H21792	H21792 Osteogenic	H21792 Osteogenic - GUSB	Osteogenic	GUSB	3	H5O2	study-collection-qPCR-H5 - plate1	2020-09-25	Emilie Briscoe	26.0519	2.06984	24.7703			25.7008			24.7703			25.7008			24.7703			25.7008
Sample	Sample iPSC	Human	Human iPSC	H5	H5 iPSC	H21792	H21792 iPSC	H21792 iPSC - GUSB	iPSC	GUSB	1	H5I2	study-collection-qPCR-H5 - plate2	2020-09-29	Emilie Briscoe	25.2616	1.98732	25.1084			26.3381			25.1084			26.3381			25.1084			26.3381
Sample	Sample iPSC	Human	Human iPSC	H5	H5 iPSC	H21792	H21792 iPSC	H21792 iPSC - GUSB	iPSC	GUSB	2	H5I2	study-collection-qPCR-H5 - plate2	2020-09-29	Emilie Briscoe	25.6859	1.98732	25.1084			26.3381			25.1084			26.3381			25.1084			26.3381
Sample	Sample iPSC	Human	Human iPSC	H5	H5 iPSC	H21792	H21792 iPSC	H21792 iPSC - GUSB	iPSC	GUSB	3	H5I2	study-collection-qPCR-H5 - plate2	2020-09-29	Emilie Briscoe	24.3776	1.98732	25.1084			26.3381			25.1084			26.3381			25.1084			26.3381
Sample	Sample MSC	Human	Human MSC	H5	H5 MSC	H21792	H21792 MSC	H21792 MSC - GUSB	MSC	GUSB	1	H5M2	study-collection-qPCR-H5 - plate2	2020-09-29	Emilie Briscoe	26.9775	1.98732	25.1084			26.3381			25.1084			26.3381			25.1084			26.3381
Sample	Sample MSC	Human	Human MSC	H5	H5 MSC	H21792	H21792 MSC	H21792 MSC - GUSB	MSC	GUSB	2	H5M2	study-collection-qPCR-H5 - plate2	2020-09-29	Emilie Briscoe	26.3391	1.98732	25.1084			26.3381			25.1084			26.3381			25.1084			26.3381
Sample	Sample MSC	Human	Human MSC	H5	H5 MSC	H21792	H21792 MSC	H21792 MSC - GUSB	MSC	GUSB	3	H5M2	study-collection-qPCR-H5 - plate2	2020-09-29	Emilie Briscoe	25.6975	1.98732	25.1084			26.3381			25.1084			26.3381			25.1084			26.3381
Sample	Sample Osteogenic	Human	Human Osteogenic	H5	H5 Osteogenic	H21792	H21792 Osteogenic	H21792 Osteogenic - GUSB	Osteogenic	GUSB	1	H5O2	study-collection-qPCR-H5 - plate2	2020-09-29	Emilie Briscoe	27.9892	1.98732	25.1084			26.3381			25.1084			26.3381			25.1084			26.3381
Sample	Sample Osteogenic	Human	Human Osteogenic	H5	H5 Osteogenic	H21792	H21792 Osteogenic	H21792 Osteogenic - GUSB	Osteogenic	GUSB	2	H5O2	study-collection-qPCR-H5 - plate2	2020-09-29	Emilie Briscoe	27.2916	1.98732	25.1084			26.3381			25.1084			26.3381			25.1084			26.3381
Sample	Sample Osteogenic	Human	Human Osteogenic	H5	H5 Osteogenic	H21792	H21792 Osteogenic	H21792 Osteogenic - GUSB	Osteogenic	GUSB	3	H5O2	study-collection-qPCR-H5 - plate2	2020-09-29	Emilie Briscoe	26.7914	1.98732	25.1084			26.3381			25.1084			26.3381			25.1084			26.3381
Sample	Sample iPSC	Human	Human iPSC	H6	H6 iPSC	H20961	H20961 iPSC	H20961 iPSC - GUSB	iPSC	GUSB	1	H6I2	study-collection-qPCR-H6 - plate1	2020-10-09	Emilie Briscoe	25.3375	1.95937	24.4763			26.6627			24.4763			26.6627			24.4763			26.6627
Sample	Sample iPSC	Human	Human iPSC	H6	H6 iPSC	H20961	H20961 iPSC	H20961 iPSC - GUSB	iPSC	GUSB	2	H6I2	study-collection-qPCR-H6 - plate1	2020-10-09	Emilie Briscoe	24.279	1.95937	24.4763			26.6627			24.4763			26.6627			24.4763			26.6627
Sample	Sample iPSC	Human	Human iPSC	H6	H6 iPSC	H20961	H20961 iPSC	H20961 iPSC - GUSB	iPSC	GUSB	3	H6I2	study-collection-qPCR-H6 - plate1	2020-10-09	Emilie Briscoe	23.8125	1.95937	24.4763			26.6627			24.4763			26.6627			24.4763			26.6627
Sample	Sample MSC	Human	Human MSC	H6	H6 MSC	H20961	H20961 MSC	H20961 MSC - GUSB	MSC	GUSB	1	H6M2	study-collection-qPCR-H6 - plate1	2020-10-09	Emilie Briscoe	27.1496	1.95937	24.4763			26.6627			24.4763			26.6627			24.4763			26.6627
Sample	Sample MSC	Human	Human MSC	H6	H6 MSC	H20961	H20961 MSC	H20961 MSC - GUSB	MSC	GUSB	2	H6M2	study-collection-qPCR-H6 - plate1	2020-10-09	Emilie Briscoe	26.4929	1.95937	24.4763			26.6627			24.4763			26.6627			24.4763			26.6627
Sample	Sample MSC	Human	Human MSC	H6	H6 MSC	H20961	H20961 MSC	H20961 MSC - GUSB	MSC	GUSB	3	H6M2	study-collection-qPCR-H6 - plate1	2020-10-09	Emilie Briscoe	26.3457	1.95937	24.4763			26.6627			24.4763			26.6627			24.4763			26.6627
Sample	Sample Adipogenic	Human	Human Adipogenic	H6	H6 Adipogenic	H20961	H20961 Adipogenic	H20961 Adipogenic - GUSB	Adipogenic	GUSB	1	H6A1	study-collection-qPCR-H6 - plate1	2020-10-09	Emilie Briscoe	28.0199	1.95937	24.4763			26.6627			24.4763			26.6627			24.4763			26.6627
Sample	Sample Adipogenic	Human	Human Adipogenic	H6	H6 Adipogenic	H20961	H20961 Adipogenic	H20961 Adipogenic - GUSB	Adipogenic	GUSB	2	H6A1	study-collection-qPCR-H6 - plate1	2020-10-09	Emilie Briscoe	26.4812	1.95937	24.4763			26.6627			24.4763			26.6627			24.4763			26.6627
Sample	Sample Adipogenic	Human	Human Adipogenic	H6	H6 Adipogenic	H20961	H20961 Adipogenic	H20961 Adipogenic - GUSB	Adipogenic	GUSB	3	H6A1	study-collection-qPCR-H6 - plate1	2020-10-09	Emilie Briscoe	26.6166	1.95937	24.4763			26.6627			24.4763			26.6627			24.4763			26.6627
Sample	Sample Chondrogenic	Human	Human Chondrogenic	H6	H6 Chondrogenic	H20961	H20961 Chondrogenic	H20961 Chondrogenic - GUSB	Chondrogenic	GUSB	1	H6C1	study-collection-qPCR-H6 - plate1	2020-10-09	Emilie Briscoe	29.026	1.95937	24.4763			26.6627			24.4763			26.6627			24.4763			26.6627
Sample	Sample Chondrogenic	Human	Human Chondrogenic	H6	H6 Chondrogenic	H20961	H20961 Chondrogenic	H20961 Chondrogenic - GUSB	Chondrogenic	GUSB	2	H6C1	study-collection-qPCR-H6 - plate1	2020-10-09	Emilie Briscoe	25.9769	1.95937	24.4763			26.6627			24.4763			26.6627			24.4763			26.6627
Sample	Sample Chondrogenic	Human	Human Chondrogenic	H6	H6 Chondrogenic	H20961	H20961 Chondrogenic	H20961 Chondrogenic - GUSB	Chondrogenic	GUSB	3	H6C1	study-collection-qPCR-H6 - plate1	2020-10-09	Emilie Briscoe	26.2723	1.95937	24.4763			26.6627			24.4763			26.6627			24.4763			26.6627
Sample	Sample Osteogenic	Human	Human Osteogenic	H6	H6 Osteogenic	H20961	H20961 Osteogenic	H20961 Osteogenic - GUSB	Osteogenic	GUSB	1	H6O3	study-collection-qPCR-H6 - plate1	2020-10-09	Emilie Briscoe	26.5678	1.95937	24.4763			26.6627			24.4763			26.6627			24.4763			26.6627
Sample	Sample Osteogenic	Human	Human Osteogenic	H6	H6 Osteogenic	H20961	H20961 Osteogenic	H20961 Osteogenic - GUSB	Osteogenic	GUSB	2	H6O3	study-collection-qPCR-H6 - plate1	2020-10-09	Emilie Briscoe	26.1514	1.95937	24.4763			26.6627			24.4763			26.6627			24.4763			26.6627
Sample	Sample Osteogenic	Human	Human Osteogenic	H6	H6 Osteogenic	H20961	H20961 Osteogenic	H20961 Osteogenic - GUSB	Osteogenic	GUSB	3	H6O3	study-collection-qPCR-H6 - plate1	2020-10-09	Emilie Briscoe	26.2913	1.95937	24.4763			26.6627			24.4763			26.6627			24.4763			26.6627
Sample	Sample iPSC	Human	Human iPSC	H6	H6 iPSC	H20961	H20961 iPSC	H20961 iPSC - GUSB	iPSC	GUSB	1	H6I2	study-collection-qPCR-H6 - plate2	2021-10-13	Emilie Briscoe	27.3555	2.09534	25.6932			27.3347			25.6932			27.3347			25.6932			27.3347
Sample	Sample iPSC	Human	Human iPSC	H6	H6 iPSC	H20961	H20961 iPSC	H20961 iPSC - GUSB	iPSC	GUSB	2	H6I2	study-collection-qPCR-H6 - plate2	2021-10-13	Emilie Briscoe	25.1585	2.09534	25.6932			27.3347			25.6932			27.3347			25.6932			27.3347
Sample	Sample iPSC	Human	Human iPSC	H6	H6 iPSC	H20961	H20961 iPSC	H20961 iPSC - GUSB	iPSC	GUSB	3	H6I2	study-collection-qPCR-H6 - plate2	2021-10-13	Emilie Briscoe	24.5656	2.09534	25.6932			27.3347			25.6932			27.3347			25.6932			27.3347
Sample	Sample MSC	Human	Human MSC	H6	H6 MSC	H20961	H20961 MSC	H20961 MSC - GUSB	MSC	GUSB	1	H6M2	study-collection-qPCR-H6 - plate2	2021-10-13	Emilie Briscoe	27.8673	2.09534	25.6932			27.3347			25.6932			27.3347			25.6932			27.3347
Sample	Sample MSC	Human	Human MSC	H6	H6 MSC	H20961	H20961 MSC	H20961 MSC - GUSB	MSC	GUSB	2	H6M2	study-collection-qPCR-H6 - plate2	2021-10-13	Emilie Briscoe	27.029	2.09534	25.6932			27.3347			25.6932			27.3347			25.6932			27.3347
Sample	Sample MSC	Human	Human MSC	H6	H6 MSC	H20961	H20961 MSC	H20961 MSC - GUSB	MSC	GUSB	3	H6M2	study-collection-qPCR-H6 - plate2	2021-10-13	Emilie Briscoe	27.1078	2.09534	25.6932			27.3347			25.6932			27.3347			25.6932			27.3347
Sample	Sample Adipogenic	Human	Human Adipogenic	H6	H6 Adipogenic	H20961	H20961 Adipogenic	H20961 Adipogenic - GUSB	Adipogenic	GUSB	1	H6A1	study-collection-qPCR-H6 - plate2	2021-10-13	Emilie Briscoe	28.5774	2.09534	25.6932			27.3347			25.6932			27.3347			25.6932			27.3347
Sample	Sample Adipogenic	Human	Human Adipogenic	H6	H6 Adipogenic	H20961	H20961 Adipogenic	H20961 Adipogenic - GUSB	Adipogenic	GUSB	2	H6A1	study-collection-qPCR-H6 - plate2	2021-10-13	Emilie Briscoe	27.2319	2.09534	25.6932			27.3347			25.6932			27.3347			25.6932			27.3347
Sample	Sample Adipogenic	Human	Human Adipogenic	H6	H6 Adipogenic	H20961	H20961 Adipogenic	H20961 Adipogenic - GUSB	Adipogenic	GUSB	3	H6A1	study-collection-qPCR-H6 - plate2	2021-10-13	Emilie Briscoe	27.6423	2.09534	25.6932			27.3347			25.6932			27.3347			25.6932			27.3347
Sample	Sample Chondrogenic	Human	Human Chondrogenic	H6	H6 Chondrogenic	H20961	H20961 Chondrogenic	H20961 Chondrogenic - GUSB	Chondrogenic	GUSB	1	H6C1	study-collection-qPCR-H6 - plate2	2021-10-13	Emilie Briscoe	29.2105	2.09534	25.6932			27.3347			25.6932			27.3347			25.6932			27.3347
Sample	Sample Chondrogenic	Human	Human Chondrogenic	H6	H6 Chondrogenic	H20961	H20961 Chondrogenic	H20961 Chondrogenic - GUSB	Chondrogenic	GUSB	2	H6C1	study-collection-qPCR-H6 - plate2	2021-10-13	Emilie Briscoe	27.002	2.09534	25.6932			27.3347			25.6932			27.3347			25.6932			27.3347
Sample	Sample Chondrogenic	Human	Human Chondrogenic	H6	H6 Chondrogenic	H20961	H20961 Chondrogenic	H20961 Chondrogenic - GUSB	Chondrogenic	GUSB	3	H6C1	study-collection-qPCR-H6 - plate2	2021-10-13	Emilie Briscoe	26.9794	2.09534	25.6932			27.3347			25.6932			27.3347			25.6932			27.3347
Sample	Sample Osteogenic	Human	Human Osteogenic	H6	H6 Osteogenic	H20961	H20961 Osteogenic	H20961 Osteogenic - GUSB	Osteogenic	GUSB	1	H6O3	study-collection-qPCR-H6 - plate2	2021-10-13	Emilie Briscoe	27.0146	2.09534	25.6932			27.3347			25.6932			27.3347			25.6932			27.3347
Sample	Sample Osteogenic	Human	Human Osteogenic	H6	H6 Osteogenic	H20961	H20961 Osteogenic	H20961 Osteogenic - GUSB	Osteogenic	GUSB	2	H6O3	study-collection-qPCR-H6 - plate2	2021-10-13	Emilie Briscoe	26.748	2.09534	25.6932			27.3347			25.6932			27.3347			25.6932			27.3347
Sample	Sample Osteogenic	Human	Human Osteogenic	H6	H6 Osteogenic	H20961	H20961 Osteogenic	H20961 Osteogenic - GUSB	Osteogenic	GUSB	3	H6O3	study-collection-qPCR-H6 - plate2	2021-10-13	Emilie Briscoe	27.1141	2.09534	25.6932			27.3347			25.6932			27.3347			25.6932			27.3347
Sample	Sample C8861 iPSC	Chimpanzee	Chimpanzee C8861 iPSC	C1	C1 C8861 iPSC	C8861	C8861 iPSC	C8861 iPSC - GUSB	C8861 iPSC	GUSB	1	C1I2	study-collection-qPCR-C1	2020-06-30	Emilie Briscoe	23.9618	1.93504							23.7764			25.1156
Sample	Sample C8861 iPSC	Chimpanzee	Chimpanzee C8861 iPSC	C1	C1 C8861 iPSC	C8861	C8861 iPSC	C8861 iPSC - GUSB	C8861 iPSC	GUSB	2	C1I2	study-collection-qPCR-C1	2020-06-30	Emilie Briscoe	24.2585	1.93504							23.7764			25.1156
Sample	Sample C8861 iPSC	Chimpanzee	Chimpanzee C8861 iPSC	C1	C1 C8861 iPSC	C8861	C8861 iPSC	C8861 iPSC - GUSB	C8861 iPSC	GUSB	3	C1I2	study-collection-qPCR-C1	2020-06-30	Emilie Briscoe	23.1088	1.93504							23.7764			25.1156
Sample	Sample C8861 MSC	Chimpanzee	Chimpanzee C8861 MSC	C1	C1 C8861 MSC	C8861	C8861 MSC	C8861 MSC - GUSB	C8861 MSC	GUSB	1	C1M2	study-collection-qPCR-C1	2020-06-30	Emilie Briscoe	25.9873	1.93504							23.7764			25.1156
Sample	Sample C8861 MSC	Chimpanzee	Chimpanzee C8861 MSC	C1	C1 C8861 MSC	C8861	C8861 MSC	C8861 MSC - GUSB	C8861 MSC	GUSB	2	C1M2	study-collection-qPCR-C1	2020-06-30	Emilie Briscoe	24.6406	1.93504							23.7764			25.1156
Sample	Sample C8861 MSC	Chimpanzee	Chimpanzee C8861 MSC	C1	C1 C8861 MSC	C8861	C8861 MSC	C8861 MSC - GUSB	C8861 MSC	GUSB	3	C1M2	study-collection-qPCR-C1	2020-06-30	Emilie Briscoe	24.7188	1.93504							23.7764			25.1156
Sample	Sample C8861 Adipogenic	Chimpanzee	Chimpanzee C8861 Adipogenic	C1	C1 C8861 Adipogenic	C8861	C8861 Adipogenic	C8861 Adipogenic - GUSB	C8861 Adipogenic	GUSB	1	C1A1	study-collection-qPCR-C1	2020-06-30	Emilie Briscoe	25.9842	1.93504							23.7764			25.1156
Sample	Sample C8861 Adipogenic	Chimpanzee	Chimpanzee C8861 Adipogenic	C1	C1 C8861 Adipogenic	C8861	C8861 Adipogenic	C8861 Adipogenic - GUSB	C8861 Adipogenic	GUSB	2	C1A1	study-collection-qPCR-C1	2020-06-30	Emilie Briscoe	24.9855	1.93504							23.7764			25.1156
Sample	Sample C8861 Adipogenic	Chimpanzee	Chimpanzee C8861 Adipogenic	C1	C1 C8861 Adipogenic	C8861	C8861 Adipogenic	C8861 Adipogenic - GUSB	C8861 Adipogenic	GUSB	3	C1A1	study-collection-qPCR-C1	2020-06-30	Emilie Briscoe	24.4104	1.93504							23.7764			25.1156
Sample	Sample C8861 Chondrogenic	Chimpanzee	Chimpanzee C8861 Chondrogenic	C1	C1 C8861 Chondrogenic	C8861	C8861 Chondrogenic	C8861 Chondrogenic - GUSB	C8861 Chondrogenic	GUSB	1	C1C2	study-collection-qPCR-C1	2020-06-30	Emilie Briscoe	25.0432	1.93504							23.7764			25.1156
Sample	Sample C8861 Chondrogenic	Chimpanzee	Chimpanzee C8861 Chondrogenic	C1	C1 C8861 Chondrogenic	C8861	C8861 Chondrogenic	C8861 Chondrogenic - GUSB	C8861 Chondrogenic	GUSB	2	C1C2	study-collection-qPCR-C1	2020-06-30	Emilie Briscoe	25.36	1.93504							23.7764			25.1156
Sample	Sample C8861 Chondrogenic	Chimpanzee	Chimpanzee C8861 Chondrogenic	C1	C1 C8861 Chondrogenic	C8861	C8861 Chondrogenic	C8861 Chondrogenic - GUSB	C8861 Chondrogenic	GUSB	3	C1C2	study-collection-qPCR-C1	2020-06-30	Emilie Briscoe	25.0146	1.93504							23.7764			25.1156
Sample	Sample iPSC	Chimpanzee	Chimpanzee iPSC	C1-r2	C1-r2 iPSC	C8861	C8861 (rep2) iPSC	C8861 (rep2) iPSC - GUSB	iPSC	GUSB	1	C1Ir2	study-collection-qPCR-C1r - plate1	2020-10-30	Emilie Briscoe	26.1705	2.21246	25.1091			25.7003			25.1091			25.7003			25.1091			25.7003
Sample	Sample iPSC	Chimpanzee	Chimpanzee iPSC	C1-r2	C1-r2 iPSC	C8861	C8861 (rep2) iPSC	C8861 (rep2) iPSC - GUSB	iPSC	GUSB	2	C1Ir2	study-collection-qPCR-C1r - plate1	2020-10-30	Emilie Briscoe	24.2678	2.21246	25.1091			25.7003			25.1091			25.7003			25.1091			25.7003
Sample	Sample iPSC	Chimpanzee	Chimpanzee iPSC	C1-r2	C1-r2 iPSC	C8861	C8861 (rep2) iPSC	C8861 (rep2) iPSC - GUSB	iPSC	GUSB	3	C1Ir2	study-collection-qPCR-C1r - plate1	2020-10-30	Emilie Briscoe	24.8889	2.21246	25.1091			25.7003			25.1091			25.7003			25.1091			25.7003
Sample	Sample MSC	Chimpanzee	Chimpanzee MSC	C1-r2	C1-r2 MSC	C8861	C8861 (rep2) MSC	C8861 (rep2) MSC - GUSB	MSC	GUSB	1	C1Mr1	study-collection-qPCR-C1r - plate1	2020-10-30	Emilie Briscoe	26.6021	2.21246	25.1091			25.7003			25.1091			25.7003			25.1091			25.7003
Sample	Sample MSC	Chimpanzee	Chimpanzee MSC	C1-r2	C1-r2 MSC	C8861	C8861 (rep2) MSC	C8861 (rep2) MSC - GUSB	MSC	GUSB	2	C1Mr1	study-collection-qPCR-C1r - plate1	2020-10-30	Emilie Briscoe	25.1088	2.21246	25.1091			25.7003			25.1091			25.7003			25.1091			25.7003
Sample	Sample MSC	Chimpanzee	Chimpanzee MSC	C1-r2	C1-r2 MSC	C8861	C8861 (rep2) MSC	C8861 (rep2) MSC - GUSB	MSC	GUSB	3	C1Mr1	study-collection-qPCR-C1r - plate1	2020-10-30	Emilie Briscoe	25.3899	2.21246	25.1091			25.7003			25.1091			25.7003			25.1091			25.7003
Sample	Sample Adipogenic	Chimpanzee	Chimpanzee Adipogenic	C1-r2	C1-r2 Adipogenic	C8861	C8861 (rep2) Adipogenic	C8861 (rep2) Adipogenic - GUSB	Adipogenic	GUSB	1	C1Ar2	study-collection-qPCR-C1r - plate1	2020-10-30	Emilie Briscoe	24.8235	2.21246	25.1091			25.7003			25.1091			25.7003			25.1091			25.7003
Sample	Sample Adipogenic	Chimpanzee	Chimpanzee Adipogenic	C1-r2	C1-r2 Adipogenic	C8861	C8861 (rep2) Adipogenic	C8861 (rep2) Adipogenic - GUSB	Adipogenic	GUSB	2	C1Ar2	study-collection-qPCR-C1r - plate1	2020-10-30	Emilie Briscoe	23.923	2.21246	25.1091			25.7003			25.1091			25.7003			25.1091			25.7003
Sample	Sample Adipogenic	Chimpanzee	Chimpanzee Adipogenic	C1-r2	C1-r2 Adipogenic	C8861	C8861 (rep2) Adipogenic	C8861 (rep2) Adipogenic - GUSB	Adipogenic	GUSB	3	C1Ar2	study-collection-qPCR-C1r - plate1	2020-10-30	Emilie Briscoe	24.3383	2.21246	25.1091			25.7003			25.1091			25.7003			25.1091			25.7003
Sample	Sample Chondrogenic	Chimpanzee	Chimpanzee Chondrogenic	C1-r2	C1-r2 Chondrogenic	C8861	C8861 (rep2) Chondrogenic	C8861 (rep2) Chondrogenic - GUSB	Chondrogenic	GUSB	1	C1Cr2	study-collection-qPCR-C1r - plate1	2020-10-30	Emilie Briscoe	27.4613	2.21246	25.1091			25.7003			25.1091			25.7003			25.1091			25.7003
Sample	Sample Chondrogenic	Chimpanzee	Chimpanzee Chondrogenic	C1-r2	C1-r2 Chondrogenic	C8861	C8861 (rep2) Chondrogenic	C8861 (rep2) Chondrogenic - GUSB	Chondrogenic	GUSB	2	C1Cr2	study-collection-qPCR-C1r - plate1	2020-10-30	Emilie Briscoe	24.4698	2.21246	25.1091			25.7003			25.1091			25.7003			25.1091			25.7003
Sample	Sample Chondrogenic	Chimpanzee	Chimpanzee Chondrogenic	C1-r2	C1-r2 Chondrogenic	C8861	C8861 (rep2) Chondrogenic	C8861 (rep2) Chondrogenic - GUSB	Chondrogenic	GUSB	3	C1Cr2	study-collection-qPCR-C1r - plate1	2020-10-30	Emilie Briscoe	24.1332	2.21246	25.1091			25.7003			25.1091			25.7003			25.1091			25.7003
Sample	Sample Osteogenic	Chimpanzee	Chimpanzee Osteogenic	C1-r2	C1-r2 Osteogenic	C8861	C8861 (rep2) Osteogenic	C8861 (rep2) Osteogenic - GUSB	Osteogenic	GUSB	1	C1Or2	study-collection-qPCR-C1r - plate1	2020-10-30	Emilie Briscoe	24.9952	2.21246	25.1091			25.7003			25.1091			25.7003			25.1091			25.7003
Sample	Sample Osteogenic	Chimpanzee	Chimpanzee Osteogenic	C1-r2	C1-r2 Osteogenic	C8861	C8861 (rep2) Osteogenic	C8861 (rep2) Osteogenic - GUSB	Osteogenic	GUSB	2	C1Or2	study-collection-qPCR-C1r - plate1	2020-10-30	Emilie Briscoe	24.0027	2.21246	25.1091			25.7003			25.1091			25.7003			25.1091			25.7003
Sample	Sample Osteogenic	Chimpanzee	Chimpanzee Osteogenic	C1-r2	C1-r2 Osteogenic	C8861	C8861 (rep2) Osteogenic	C8861 (rep2) Osteogenic - GUSB	Osteogenic	GUSB	3	C1Or2	study-collection-qPCR-C1r - plate1	2020-10-30	Emilie Briscoe	24.351	2.21246	25.1091			25.7003			25.1091			25.7003			25.1091			25.7003
Sample	Sample iPSC	Chimpanzee	Chimpanzee iPSC	C1-r2	C1-r2 iPSC	C8861	C8861 (rep2) iPSC	C8861 (rep2) iPSC - GUSB	iPSC	GUSB	1	C1Ir2	study-collection-qPCR-C1r - plate2	2020-11-03	Emilie Briscoe	26.4749	1.88971	25.7116			26.1692			25.7116			26.1692			25.7116			26.1692
Sample	Sample iPSC	Chimpanzee	Chimpanzee iPSC	C1-r2	C1-r2 iPSC	C8861	C8861 (rep2) iPSC	C8861 (rep2) iPSC - GUSB	iPSC	GUSB	2	C1Ir2	study-collection-qPCR-C1r - plate2	2020-11-03	Emilie Briscoe	25.3178	1.88971	25.7116			26.1692			25.7116			26.1692			25.7116			26.1692
Sample	Sample iPSC	Chimpanzee	Chimpanzee iPSC	C1-r2	C1-r2 iPSC	C8861	C8861 (rep2) iPSC	C8861 (rep2) iPSC - GUSB	iPSC	GUSB	3	C1Ir2	study-collection-qPCR-C1r - plate2	2020-11-03	Emilie Briscoe	25.3422	1.88971	25.7116			26.1692			25.7116			26.1692			25.7116			26.1692
Sample	Sample MSC	Chimpanzee	Chimpanzee MSC	C1-r2	C1-r2 MSC	C8861	C8861 (rep2) MSC	C8861 (rep2) MSC - GUSB	MSC	GUSB	1	C1Mr1	study-collection-qPCR-C1r - plate2	2020-11-03	Emilie Briscoe	26.8374	1.88971	25.7116			26.1692			25.7116			26.1692			25.7116			26.1692
Sample	Sample MSC	Chimpanzee	Chimpanzee MSC	C1-r2	C1-r2 MSC	C8861	C8861 (rep2) MSC	C8861 (rep2) MSC - GUSB	MSC	GUSB	2	C1Mr1	study-collection-qPCR-C1r - plate2	2020-11-03	Emilie Briscoe	25.7053	1.88971	25.7116			26.1692			25.7116			26.1692			25.7116			26.1692
Sample	Sample MSC	Chimpanzee	Chimpanzee MSC	C1-r2	C1-r2 MSC	C8861	C8861 (rep2) MSC	C8861 (rep2) MSC - GUSB	MSC	GUSB	3	C1Mr1	study-collection-qPCR-C1r - plate2	2020-11-03	Emilie Briscoe	25.9649	1.88971	25.7116			26.1692			25.7116			26.1692			25.7116			26.1692
Sample	Sample Adipogenic	Chimpanzee	Chimpanzee Adipogenic	C1-r2	C1-r2 Adipogenic	C8861	C8861 (rep2) Adipogenic	C8861 (rep2) Adipogenic - GUSB	Adipogenic	GUSB	1	C1Ar2	study-collection-qPCR-C1r - plate2	2020-11-03	Emilie Briscoe	25.6358	1.88971	25.7116			26.1692			25.7116			26.1692			25.7116			26.1692
Sample	Sample Adipogenic	Chimpanzee	Chimpanzee Adipogenic	C1-r2	C1-r2 Adipogenic	C8861	C8861 (rep2) Adipogenic	C8861 (rep2) Adipogenic - GUSB	Adipogenic	GUSB	2	C1Ar2	study-collection-qPCR-C1r - plate2	2020-11-03	Emilie Briscoe	24.7308	1.88971	25.7116			26.1692			25.7116			26.1692			25.7116			26.1692
Sample	Sample Adipogenic	Chimpanzee	Chimpanzee Adipogenic	C1-r2	C1-r2 Adipogenic	C8861	C8861 (rep2) Adipogenic	C8861 (rep2) Adipogenic - GUSB	Adipogenic	GUSB	3	C1Ar2	study-collection-qPCR-C1r - plate2	2020-11-03	Emilie Briscoe	24.6968	1.88971	25.7116			26.1692			25.7116			26.1692			25.7116			26.1692
Sample	Sample Chondrogenic	Chimpanzee	Chimpanzee Chondrogenic	C1-r2	C1-r2 Chondrogenic	C8861	C8861 (rep2) Chondrogenic	C8861 (rep2) Chondrogenic - GUSB	Chondrogenic	GUSB	1	C1Cr2	study-collection-qPCR-C1r - plate2	2020-11-03	Emilie Briscoe	26.6001	1.88971	25.7116			26.1692			25.7116			26.1692			25.7116			26.1692
Sample	Sample Chondrogenic	Chimpanzee	Chimpanzee Chondrogenic	C1-r2	C1-r2 Chondrogenic	C8861	C8861 (rep2) Chondrogenic	C8861 (rep2) Chondrogenic - GUSB	Chondrogenic	GUSB	2	C1Cr2	study-collection-qPCR-C1r - plate2	2020-11-03	Emilie Briscoe	25.361	1.88971	25.7116			26.1692			25.7116			26.1692			25.7116			26.1692
Sample	Sample Chondrogenic	Chimpanzee	Chimpanzee Chondrogenic	C1-r2	C1-r2 Chondrogenic	C8861	C8861 (rep2) Chondrogenic	C8861 (rep2) Chondrogenic - GUSB	Chondrogenic	GUSB	3	C1Cr2	study-collection-qPCR-C1r - plate2	2020-11-03	Emilie Briscoe	25.8126	1.88971	25.7116			26.1692			25.7116			26.1692			25.7116			26.1692
Sample	Sample Osteogenic	Chimpanzee	Chimpanzee Osteogenic	C1-r2	C1-r2 Osteogenic	C8861	C8861 (rep2) Osteogenic	C8861 (rep2) Osteogenic - GUSB	Osteogenic	GUSB	1	C1Or2	study-collection-qPCR-C1r - plate2	2020-11-03	Emilie Briscoe	26.3928	1.88971	25.7116			26.1692			25.7116			26.1692			25.7116			26.1692
Sample	Sample Osteogenic	Chimpanzee	Chimpanzee Osteogenic	C1-r2	C1-r2 Osteogenic	C8861	C8861 (rep2) Osteogenic	C8861 (rep2) Osteogenic - GUSB	Osteogenic	GUSB	2	C1Or2	study-collection-qPCR-C1r - plate2	2020-11-03	Emilie Briscoe	25.5719	1.88971	25.7116			26.1692			25.7116			26.1692			25.7116			26.1692
Sample	Sample Osteogenic	Chimpanzee	Chimpanzee Osteogenic	C1-r2	C1-r2 Osteogenic	C8861	C8861 (rep2) Osteogenic	C8861 (rep2) Osteogenic - GUSB	Osteogenic	GUSB	3	C1Or2	study-collection-qPCR-C1r - plate2	2020-11-03	Emilie Briscoe	25.6668	1.88971	25.7116			26.1692			25.7116			26.1692			25.7116			26.1692
Sample	Sample iPSC	Chimpanzee	Chimpanzee iPSC	C2	C2 iPSC	C3647	C3647 iPSC	C3647 iPSC - GUSB	iPSC	GUSB	1	C2I2	study-collection-qPCR-C2 - plate1	2020-08-12	Emilie Briscoe	25.5169	1.87195	25.0472			25.1618			25.0472			25.1618			25.0472			25.1618
Sample	Sample iPSC	Chimpanzee	Chimpanzee iPSC	C2	C2 iPSC	C3647	C3647 iPSC	C3647 iPSC - GUSB	iPSC	GUSB	2	C2I2	study-collection-qPCR-C2 - plate1	2020-08-12	Emilie Briscoe	24.6835	1.87195	25.0472			25.1618			25.0472			25.1618			25.0472			25.1618
Sample	Sample iPSC	Chimpanzee	Chimpanzee iPSC	C2	C2 iPSC	C3647	C3647 iPSC	C3647 iPSC - GUSB	iPSC	GUSB	3	C2I2	study-collection-qPCR-C2 - plate1	2020-08-12	Emilie Briscoe	24.9411	1.87195	25.0472			25.1618			25.0472			25.1618			25.0472			25.1618
Sample	Sample MSC	Chimpanzee	Chimpanzee MSC	C2	C2 MSC	C3647	C3647 MSC	C3647 MSC - GUSB	MSC	GUSB	1	C2M2	study-collection-qPCR-C2 - plate1	2020-08-12	Emilie Briscoe	25.7306	1.87195	25.0472			25.1618			25.0472			25.1618			25.0472			25.1618
Sample	Sample MSC	Chimpanzee	Chimpanzee MSC	C2	C2 MSC	C3647	C3647 MSC	C3647 MSC - GUSB	MSC	GUSB	2	C2M2	study-collection-qPCR-C2 - plate1	2020-08-12	Emilie Briscoe	25.0788	1.87195	25.0472			25.1618			25.0472			25.1618			25.0472			25.1618
Sample	Sample MSC	Chimpanzee	Chimpanzee MSC	C2	C2 MSC	C3647	C3647 MSC	C3647 MSC - GUSB	MSC	GUSB	3	C2M2	study-collection-qPCR-C2 - plate1	2020-08-12	Emilie Briscoe	24.6759	1.87195	25.0472			25.1618			25.0472			25.1618			25.0472			25.1618
Sample	Sample Adipogenic	Chimpanzee	Chimpanzee Adipogenic	C2	C2 Adipogenic	C3647	C3647 Adipogenic	C3647 Adipogenic - GUSB	Adipogenic	GUSB	1	C2A2	study-collection-qPCR-C2 - plate1	2020-08-12	Emilie Briscoe	24.3471	1.87195	25.0472			25.1618			25.0472			25.1618			25.0472			25.1618
Sample	Sample Adipogenic	Chimpanzee	Chimpanzee Adipogenic	C2	C2 Adipogenic	C3647	C3647 Adipogenic	C3647 Adipogenic - GUSB	Adipogenic	GUSB	2	C2A2	study-collection-qPCR-C2 - plate1	2020-08-12	Emilie Briscoe	24.2129	1.87195	25.0472			25.1618			25.0472			25.1618			25.0472			25.1618
Sample	Sample Adipogenic	Chimpanzee	Chimpanzee Adipogenic	C2	C2 Adipogenic	C3647	C3647 Adipogenic	C3647 Adipogenic - GUSB	Adipogenic	GUSB	3	C2A2	study-collection-qPCR-C2 - plate1	2020-08-12	Emilie Briscoe	24.3943	1.87195	25.0472			25.1618			25.0472			25.1618			25.0472			25.1618
Sample	Sample Chondrogenic	Chimpanzee	Chimpanzee Chondrogenic	C2	C2 Chondrogenic	C3647	C3647 Chondrogenic	C3647 Chondrogenic - GUSB	Chondrogenic	GUSB	1	C2C2	study-collection-qPCR-C2 - plate1	2020-08-12	Emilie Briscoe	25.9815	1.87195	25.0472			25.1618			25.0472			25.1618			25.0472			25.1618
Sample	Sample Chondrogenic	Chimpanzee	Chimpanzee Chondrogenic	C2	C2 Chondrogenic	C3647	C3647 Chondrogenic	C3647 Chondrogenic - GUSB	Chondrogenic	GUSB	2	C2C2	study-collection-qPCR-C2 - plate1	2020-08-12	Emilie Briscoe	25.3819	1.87195	25.0472			25.1618			25.0472			25.1618			25.0472			25.1618
Sample	Sample Chondrogenic	Chimpanzee	Chimpanzee Chondrogenic	C2	C2 Chondrogenic	C3647	C3647 Chondrogenic	C3647 Chondrogenic - GUSB	Chondrogenic	GUSB	3	C2C2	study-collection-qPCR-C2 - plate1	2020-08-12	Emilie Briscoe	25.4693	1.87195	25.0472			25.1618			25.0472			25.1618			25.0472			25.1618
Sample	Sample Osteogenic	Chimpanzee	Chimpanzee Osteogenic	C2	C2 Osteogenic	C3647	C3647 Osteogenic	C3647 Osteogenic - GUSB	Osteogenic	GUSB	1	C2O1	study-collection-qPCR-C2 - plate1	2020-08-12	Emilie Briscoe	25.5133	1.87195	25.0472			25.1618			25.0472			25.1618			25.0472			25.1618
Sample	Sample Osteogenic	Chimpanzee	Chimpanzee Osteogenic	C2	C2 Osteogenic	C3647	C3647 Osteogenic	C3647 Osteogenic - GUSB	Osteogenic	GUSB	2	C2O1	study-collection-qPCR-C2 - plate1	2020-08-12	Emilie Briscoe	24.4297	1.87195	25.0472			25.1618			25.0472			25.1618			25.0472			25.1618
Sample	Sample Osteogenic	Chimpanzee	Chimpanzee Osteogenic	C2	C2 Osteogenic	C3647	C3647 Osteogenic	C3647 Osteogenic - GUSB	Osteogenic	GUSB	3	C2O1	study-collection-qPCR-C2 - plate1	2020-08-12	Emilie Briscoe	24.2039	1.87195	25.0472			25.1618			25.0472			25.1618			25.0472			25.1618
Sample	Sample iPSC	Chimpanzee	Chimpanzee iPSC	C2	C2 iPSC	C3647	C3647 iPSC	C3647 iPSC - GUSB	iPSC	GUSB	1	C2I2	study-collection-qPCR-C2 - plate2	2020-08-18	Emilie Briscoe	24.7605	1.88776	24.1915			26.4989			24.1915			26.4989			24.1915			26.4989
Sample	Sample iPSC	Chimpanzee	Chimpanzee iPSC	C2	C2 iPSC	C3647	C3647 iPSC	C3647 iPSC - GUSB	iPSC	GUSB	2	C2I2	study-collection-qPCR-C2 - plate2	2020-08-18	Emilie Briscoe	23.845	1.88776	24.1915			26.4989			24.1915			26.4989			24.1915			26.4989
Sample	Sample iPSC	Chimpanzee	Chimpanzee iPSC	C2	C2 iPSC	C3647	C3647 iPSC	C3647 iPSC - GUSB	iPSC	GUSB	3	C2I2	study-collection-qPCR-C2 - plate2	2020-08-18	Emilie Briscoe	23.9689	1.88776	24.1915			26.4989			24.1915			26.4989			24.1915			26.4989
Sample	Sample MSC	Chimpanzee	Chimpanzee MSC	C2	C2 MSC	C3647	C3647 MSC	C3647 MSC - GUSB	MSC	GUSB	1	C2M2	study-collection-qPCR-C2 - plate2	2020-08-18	Emilie Briscoe	27.2306	1.88776	24.1915			26.4989			24.1915			26.4989			24.1915			26.4989
Sample	Sample MSC	Chimpanzee	Chimpanzee MSC	C2	C2 MSC	C3647	C3647 MSC	C3647 MSC - GUSB	MSC	GUSB	2	C2M2	study-collection-qPCR-C2 - plate2	2020-08-18	Emilie Briscoe	25.9229	1.88776	24.1915			26.4989			24.1915			26.4989			24.1915			26.4989
Sample	Sample MSC	Chimpanzee	Chimpanzee MSC	C2	C2 MSC	C3647	C3647 MSC	C3647 MSC - GUSB	MSC	GUSB	3	C2M2	study-collection-qPCR-C2 - plate2	2020-08-18	Emilie Briscoe	26.3433	1.88776	24.1915			26.4989			24.1915			26.4989			24.1915			26.4989
Sample	Sample Adipogenic	Chimpanzee	Chimpanzee Adipogenic	C2	C2 Adipogenic	C3647	C3647 Adipogenic	C3647 Adipogenic - GUSB	Adipogenic	GUSB	1	C2A2	study-collection-qPCR-C2 - plate2	2020-08-18	Emilie Briscoe	25.303	1.88776	24.1915			26.4989			24.1915			26.4989			24.1915			26.4989
Sample	Sample Adipogenic	Chimpanzee	Chimpanzee Adipogenic	C2	C2 Adipogenic	C3647	C3647 Adipogenic	C3647 Adipogenic - GUSB	Adipogenic	GUSB	2	C2A2	study-collection-qPCR-C2 - plate2	2020-08-18	Emilie Briscoe	25.0839	1.88776	24.1915			26.4989			24.1915			26.4989			24.1915			26.4989
Sample	Sample Adipogenic	Chimpanzee	Chimpanzee Adipogenic	C2	C2 Adipogenic	C3647	C3647 Adipogenic	C3647 Adipogenic - GUSB	Adipogenic	GUSB	3	C2A2	study-collection-qPCR-C2 - plate2	2020-08-18	Emilie Briscoe	24.9587	1.88776	24.1915			26.4989			24.1915			26.4989			24.1915			26.4989
Sample	Sample Chondrogenic	Chimpanzee	Chimpanzee Chondrogenic	C2	C2 Chondrogenic	C3647	C3647 Chondrogenic	C3647 Chondrogenic - GUSB	Chondrogenic	GUSB	1	C2C2	study-collection-qPCR-C2 - plate2	2020-08-18	Emilie Briscoe	26.2692	1.88776	24.1915			26.4989			24.1915			26.4989			24.1915			26.4989
Sample	Sample Chondrogenic	Chimpanzee	Chimpanzee Chondrogenic	C2	C2 Chondrogenic	C3647	C3647 Chondrogenic	C3647 Chondrogenic - GUSB	Chondrogenic	GUSB	2	C2C2	study-collection-qPCR-C2 - plate2	2020-08-18	Emilie Briscoe	25.9137	1.88776	24.1915			26.4989			24.1915			26.4989			24.1915			26.4989
Sample	Sample Chondrogenic	Chimpanzee	Chimpanzee Chondrogenic	C2	C2 Chondrogenic	C3647	C3647 Chondrogenic	C3647 Chondrogenic - GUSB	Chondrogenic	GUSB	3	C2C2	study-collection-qPCR-C2 - plate2	2020-08-18	Emilie Briscoe	25.5707	1.88776	24.1915			26.4989			24.1915			26.4989			24.1915			26.4989
Sample	Sample Osteogenic	Chimpanzee	Chimpanzee Osteogenic	C2	C2 Osteogenic	C3647	C3647 Osteogenic	C3647 Osteogenic - GUSB	Osteogenic	GUSB	1	C2O1	study-collection-qPCR-C2 - plate2	2020-08-18	Emilie Briscoe	26.7345	1.88776	24.1915			26.4989			24.1915			26.4989			24.1915			26.4989
Sample	Sample Osteogenic	Chimpanzee	Chimpanzee Osteogenic	C2	C2 Osteogenic	C3647	C3647 Osteogenic	C3647 Osteogenic - GUSB	Osteogenic	GUSB	2	C2O1	study-collection-qPCR-C2 - plate2	2020-08-18	Emilie Briscoe	25.5623	1.88776	24.1915			26.4989			24.1915			26.4989			24.1915			26.4989
Sample	Sample Osteogenic	Chimpanzee	Chimpanzee Osteogenic	C2	C2 Osteogenic	C3647	C3647 Osteogenic	C3647 Osteogenic - GUSB	Osteogenic	GUSB	3	C2O1	study-collection-qPCR-C2 - plate2	2020-08-18	Emilie Briscoe	25.0546	1.88776	24.1915			26.4989			24.1915			26.4989			24.1915			26.4989
Sample	Sample iPSC	Chimpanzee	Chimpanzee iPSC	C3	C3 iPSC	C3649	C3649 iPSC	C3649 iPSC - GUSB	iPSC	GUSB	1	C3I2	study-collection-qPCR-C3 - plate1	2020-09-01	Emilie Briscoe	24.5731	2.06167	24.3194			25.7358			24.3194			25.7358			24.3194			25.7358
Sample	Sample iPSC	Chimpanzee	Chimpanzee iPSC	C3	C3 iPSC	C3649	C3649 iPSC	C3649 iPSC - GUSB	iPSC	GUSB	2	C3I2	study-collection-qPCR-C3 - plate1	2020-09-01	Emilie Briscoe	24.2007	2.06167	24.3194			25.7358			24.3194			25.7358			24.3194			25.7358
Sample	Sample iPSC	Chimpanzee	Chimpanzee iPSC	C3	C3 iPSC	C3649	C3649 iPSC	C3649 iPSC - GUSB	iPSC	GUSB	3	C3I2	study-collection-qPCR-C3 - plate1	2020-09-01	Emilie Briscoe	24.1843	2.06167	24.3194			25.7358			24.3194			25.7358			24.3194			25.7358
Sample	Sample MSC	Chimpanzee	Chimpanzee MSC	C3	C3 MSC	C3649	C3649 MSC	C3649 MSC - GUSB	MSC	GUSB	1	C3M2	study-collection-qPCR-C3 - plate1	2020-09-01	Emilie Briscoe	25.8197	2.06167	24.3194			25.7358			24.3194			25.7358			24.3194			25.7358
Sample	Sample MSC	Chimpanzee	Chimpanzee MSC	C3	C3 MSC	C3649	C3649 MSC	C3649 MSC - GUSB	MSC	GUSB	2	C3M2	study-collection-qPCR-C3 - plate1	2020-09-01	Emilie Briscoe	25.7208	2.06167	24.3194			25.7358			24.3194			25.7358			24.3194			25.7358
Sample	Sample MSC	Chimpanzee	Chimpanzee MSC	C3	C3 MSC	C3649	C3649 MSC	C3649 MSC - GUSB	MSC	GUSB	3	C3M2	study-collection-qPCR-C3 - plate1	2020-09-01	Emilie Briscoe	25.667	2.06167	24.3194			25.7358			24.3194			25.7358			24.3194			25.7358
Sample	Sample Adipogenic	Chimpanzee	Chimpanzee Adipogenic	C3	C3 Adipogenic	C3649	C3649 Adipogenic	C3649 Adipogenic - GUSB	Adipogenic	GUSB	1	C3A2	study-collection-qPCR-C3 - plate1	2020-09-01	Emilie Briscoe	24.1207	2.06167	24.3194			25.7358			24.3194			25.7358			24.3194			25.7358
Sample	Sample Adipogenic	Chimpanzee	Chimpanzee Adipogenic	C3	C3 Adipogenic	C3649	C3649 Adipogenic	C3649 Adipogenic - GUSB	Adipogenic	GUSB	2	C3A2	study-collection-qPCR-C3 - plate1	2020-09-01	Emilie Briscoe	23.1543	2.06167	24.3194			25.7358			24.3194			25.7358			24.3194			25.7358
Sample	Sample Adipogenic	Chimpanzee	Chimpanzee Adipogenic	C3	C3 Adipogenic	C3649	C3649 Adipogenic	C3649 Adipogenic - GUSB	Adipogenic	GUSB	3	C3A2	study-collection-qPCR-C3 - plate1	2020-09-01	Emilie Briscoe	23.2323	2.06167	24.3194			25.7358			24.3194			25.7358			24.3194			25.7358
Sample	Sample Chondrogenic	Chimpanzee	Chimpanzee Chondrogenic	C3	C3 Chondrogenic	C3649	C3649 Chondrogenic	C3649 Chondrogenic - GUSB	Chondrogenic	GUSB	1	C3C2	study-collection-qPCR-C3 - plate1	2020-09-01	Emilie Briscoe	23.5279	2.06167	24.3194			25.7358			24.3194			25.7358			24.3194			25.7358
Sample	Sample Chondrogenic	Chimpanzee	Chimpanzee Chondrogenic	C3	C3 Chondrogenic	C3649	C3649 Chondrogenic	C3649 Chondrogenic - GUSB	Chondrogenic	GUSB	2	C3C2	study-collection-qPCR-C3 - plate1	2020-09-01	Emilie Briscoe	22.8006	2.06167	24.3194			25.7358			24.3194			25.7358			24.3194			25.7358
Sample	Sample Chondrogenic	Chimpanzee	Chimpanzee Chondrogenic	C3	C3 Chondrogenic	C3649	C3649 Chondrogenic	C3649 Chondrogenic - GUSB	Chondrogenic	GUSB	3	C3C2	study-collection-qPCR-C3 - plate1	2020-09-01	Emilie Briscoe	22.9633	2.06167	24.3194			25.7358			24.3194			25.7358			24.3194			25.7358
Sample	Sample Osteogenic	Chimpanzee	Chimpanzee Osteogenic	C3	C3 Osteogenic	C3649	C3649 Osteogenic	C3649 Osteogenic - GUSB	Osteogenic	GUSB	1	C3O2	study-collection-qPCR-C3 - plate1	2020-09-01	Emilie Briscoe	24.9394	2.06167	24.3194			25.7358			24.3194			25.7358			24.3194			25.7358
Sample	Sample Osteogenic	Chimpanzee	Chimpanzee Osteogenic	C3	C3 Osteogenic	C3649	C3649 Osteogenic	C3649 Osteogenic - GUSB	Osteogenic	GUSB	2	C3O2	study-collection-qPCR-C3 - plate1	2020-09-01	Emilie Briscoe	24.2478	2.06167	24.3194			25.7358			24.3194			25.7358			24.3194			25.7358
Sample	Sample Osteogenic	Chimpanzee	Chimpanzee Osteogenic	C3	C3 Osteogenic	C3649	C3649 Osteogenic	C3649 Osteogenic - GUSB	Osteogenic	GUSB	3	C3O2	study-collection-qPCR-C3 - plate1	2020-09-01	Emilie Briscoe	24.7321	2.06167	24.3194			25.7358			24.3194			25.7358			24.3194			25.7358
Sample	Sample iPSC	Chimpanzee	Chimpanzee iPSC	C3	C3 iPSC	C3649	C3649 iPSC	C3649 iPSC - GUSB	iPSC	GUSB	1	C3I2	study-collection-qPCR-C3 - plate2	2020-09-03	Emilie Briscoe	26.5932	1.9949	25.5536			25.3505			25.5536			25.3505			25.5536			25.3505
Sample	Sample iPSC	Chimpanzee	Chimpanzee iPSC	C3	C3 iPSC	C3649	C3649 iPSC	C3649 iPSC - GUSB	iPSC	GUSB	2	C3I2	study-collection-qPCR-C3 - plate2	2020-09-03	Emilie Briscoe	25.1687	1.9949	25.5536			25.3505			25.5536			25.3505			25.5536			25.3505
Sample	Sample iPSC	Chimpanzee	Chimpanzee iPSC	C3	C3 iPSC	C3649	C3649 iPSC	C3649 iPSC - GUSB	iPSC	GUSB	3	C3I2	study-collection-qPCR-C3 - plate2	2020-09-03	Emilie Briscoe	24.8988	1.9949	25.5536			25.3505			25.5536			25.3505			25.5536			25.3505
Sample	Sample MSC	Chimpanzee	Chimpanzee MSC	C3	C3 MSC	C3649	C3649 MSC	C3649 MSC - GUSB	MSC	GUSB	1	C3M2	study-collection-qPCR-C3 - plate2	2020-09-03	Emilie Briscoe	26.1097	1.9949	25.5536			25.3505			25.5536			25.3505			25.5536			25.3505
Sample	Sample MSC	Chimpanzee	Chimpanzee MSC	C3	C3 MSC	C3649	C3649 MSC	C3649 MSC - GUSB	MSC	GUSB	2	C3M2	study-collection-qPCR-C3 - plate2	2020-09-03	Emilie Briscoe	24.9633	1.9949	25.5536			25.3505			25.5536			25.3505			25.5536			25.3505
Sample	Sample MSC	Chimpanzee	Chimpanzee MSC	C3	C3 MSC	C3649	C3649 MSC	C3649 MSC - GUSB	MSC	GUSB	3	C3M2	study-collection-qPCR-C3 - plate2	2020-09-03	Emilie Briscoe	24.9785	1.9949	25.5536			25.3505			25.5536			25.3505			25.5536			25.3505
Sample	Sample Adipogenic	Chimpanzee	Chimpanzee Adipogenic	C3	C3 Adipogenic	C3649	C3649 Adipogenic	C3649 Adipogenic - GUSB	Adipogenic	GUSB	1	C3A2	study-collection-qPCR-C3 - plate2	2020-09-03	Emilie Briscoe	24.9591	1.9949	25.5536			25.3505			25.5536			25.3505			25.5536			25.3505
Sample	Sample Adipogenic	Chimpanzee	Chimpanzee Adipogenic	C3	C3 Adipogenic	C3649	C3649 Adipogenic	C3649 Adipogenic - GUSB	Adipogenic	GUSB	2	C3A2	study-collection-qPCR-C3 - plate2	2020-09-03	Emilie Briscoe	23.5831	1.9949	25.5536			25.3505			25.5536			25.3505			25.5536			25.3505
Sample	Sample Adipogenic	Chimpanzee	Chimpanzee Adipogenic	C3	C3 Adipogenic	C3649	C3649 Adipogenic	C3649 Adipogenic - GUSB	Adipogenic	GUSB	3	C3A2	study-collection-qPCR-C3 - plate2	2020-09-03	Emilie Briscoe	24.0468	1.9949	25.5536			25.3505			25.5536			25.3505			25.5536			25.3505
Sample	Sample Chondrogenic	Chimpanzee	Chimpanzee Chondrogenic	C3	C3 Chondrogenic	C3649	C3649 Chondrogenic	C3649 Chondrogenic - GUSB	Chondrogenic	GUSB	1	C3C2	study-collection-qPCR-C3 - plate2	2020-09-03	Emilie Briscoe	26.0145	1.9949	25.5536			25.3505			25.5536			25.3505			25.5536			25.3505
Sample	Sample Chondrogenic	Chimpanzee	Chimpanzee Chondrogenic	C3	C3 Chondrogenic	C3649	C3649 Chondrogenic	C3649 Chondrogenic - GUSB	Chondrogenic	GUSB	2	C3C2	study-collection-qPCR-C3 - plate2	2020-09-03	Emilie Briscoe	24.4552	1.9949	25.5536			25.3505			25.5536			25.3505			25.5536			25.3505
Sample	Sample Chondrogenic	Chimpanzee	Chimpanzee Chondrogenic	C3	C3 Chondrogenic	C3649	C3649 Chondrogenic	C3649 Chondrogenic - GUSB	Chondrogenic	GUSB	3	C3C2	study-collection-qPCR-C3 - plate2	2020-09-03	Emilie Briscoe	24.4939	1.9949	25.5536			25.3505			25.5536			25.3505			25.5536			25.3505
Sample	Sample Osteogenic	Chimpanzee	Chimpanzee Osteogenic	C3	C3 Osteogenic	C3649	C3649 Osteogenic	C3649 Osteogenic - GUSB	Osteogenic	GUSB	1	C3O2	study-collection-qPCR-C3 - plate2	2020-09-03	Emilie Briscoe	26.4675	1.9949	25.5536			25.3505			25.5536			25.3505			25.5536			25.3505
Sample	Sample Osteogenic	Chimpanzee	Chimpanzee Osteogenic	C3	C3 Osteogenic	C3649	C3649 Osteogenic	C3649 Osteogenic - GUSB	Osteogenic	GUSB	2	C3O2	study-collection-qPCR-C3 - plate2	2020-09-03	Emilie Briscoe	25.3047	1.9949	25.5536			25.3505			25.5536			25.3505			25.5536			25.3505
Sample	Sample Osteogenic	Chimpanzee	Chimpanzee Osteogenic	C3	C3 Osteogenic	C3649	C3649 Osteogenic	C3649 Osteogenic - GUSB	Osteogenic	GUSB	3	C3O2	study-collection-qPCR-C3 - plate2	2020-09-03	Emilie Briscoe	25.21	1.9949	25.5536			25.3505			25.5536			25.3505			25.5536			25.3505
Sample	Sample iPSC	Chimpanzee	Chimpanzee iPSC	C4	C4 iPSC	C40210	C40210 iPSC	C40210 iPSC - GUSB	iPSC	GUSB	1	C4I2	study-collection-qPCR-C4 - plate1	2020-09-17	Emilie Briscoe	25.1209	1.97752	24.5906			24.1747			24.5906			24.1747			24.5906			24.1747
Sample	Sample iPSC	Chimpanzee	Chimpanzee iPSC	C4	C4 iPSC	C40210	C40210 iPSC	C40210 iPSC - GUSB	iPSC	GUSB	2	C4I2	study-collection-qPCR-C4 - plate1	2020-09-17	Emilie Briscoe	24.4895	1.97752	24.5906			24.1747			24.5906			24.1747			24.5906			24.1747
Sample	Sample iPSC	Chimpanzee	Chimpanzee iPSC	C4	C4 iPSC	C40210	C40210 iPSC	C40210 iPSC - GUSB	iPSC	GUSB	3	C4I2	study-collection-qPCR-C4 - plate1	2020-09-17	Emilie Briscoe	24.1615	1.97752	24.5906			24.1747			24.5906			24.1747			24.5906			24.1747
Sample	Sample MSC	Chimpanzee	Chimpanzee MSC	C4	C4 MSC	C40210	C40210 MSC	C40210 MSC - GUSB	MSC	GUSB	1	C4M2	study-collection-qPCR-C4 - plate1	2020-09-17	Emilie Briscoe	24.6412	1.97752	24.5906			24.1747			24.5906			24.1747			24.5906			24.1747
Sample	Sample MSC	Chimpanzee	Chimpanzee MSC	C4	C4 MSC	C40210	C40210 MSC	C40210 MSC - GUSB	MSC	GUSB	2	C4M2	study-collection-qPCR-C4 - plate1	2020-09-17	Emilie Briscoe	23.8956	1.97752	24.5906			24.1747			24.5906			24.1747			24.5906			24.1747
Sample	Sample MSC	Chimpanzee	Chimpanzee MSC	C4	C4 MSC	C40210	C40210 MSC	C40210 MSC - GUSB	MSC	GUSB	3	C4M2	study-collection-qPCR-C4 - plate1	2020-09-17	Emilie Briscoe	23.9872	1.97752	24.5906			24.1747			24.5906			24.1747			24.5906			24.1747
Sample	Sample Adipogenic	Chimpanzee	Chimpanzee Adipogenic	C4	C4 Adipogenic	C40210	C40210 Adipogenic	C40210 Adipogenic - GUSB	Adipogenic	GUSB	1	C4A2	study-collection-qPCR-C4 - plate1	2020-09-17	Emilie Briscoe	24.8389	1.97752	24.5906			24.1747			24.5906			24.1747			24.5906			24.1747
Sample	Sample Adipogenic	Chimpanzee	Chimpanzee Adipogenic	C4	C4 Adipogenic	C40210	C40210 Adipogenic	C40210 Adipogenic - GUSB	Adipogenic	GUSB	2	C4A2	study-collection-qPCR-C4 - plate1	2020-09-17	Emilie Briscoe	24.9264	1.97752	24.5906			24.1747			24.5906			24.1747			24.5906			24.1747
Sample	Sample Adipogenic	Chimpanzee	Chimpanzee Adipogenic	C4	C4 Adipogenic	C40210	C40210 Adipogenic	C40210 Adipogenic - GUSB	Adipogenic	GUSB	3	C4A2	study-collection-qPCR-C4 - plate1	2020-09-17	Emilie Briscoe	25.1397	1.97752	24.5906			24.1747			24.5906			24.1747			24.5906			24.1747
Sample	Sample Chondrogenic	Chimpanzee	Chimpanzee Chondrogenic	C4	C4 Chondrogenic	C40210	C40210 Chondrogenic	C40210 Chondrogenic - GUSB	Chondrogenic	GUSB	1	C4C2	study-collection-qPCR-C4 - plate1	2020-09-17	Emilie Briscoe	25.732	1.97752	24.5906			24.1747			24.5906			24.1747			24.5906			24.1747
Sample	Sample Chondrogenic	Chimpanzee	Chimpanzee Chondrogenic	C4	C4 Chondrogenic	C40210	C40210 Chondrogenic	C40210 Chondrogenic - GUSB	Chondrogenic	GUSB	2	C4C2	study-collection-qPCR-C4 - plate1	2020-09-17	Emilie Briscoe	25.3115	1.97752	24.5906			24.1747			24.5906			24.1747			24.5906			24.1747
Sample	Sample Chondrogenic	Chimpanzee	Chimpanzee Chondrogenic	C4	C4 Chondrogenic	C40210	C40210 Chondrogenic	C40210 Chondrogenic - GUSB	Chondrogenic	GUSB	3	C4C2	study-collection-qPCR-C4 - plate1	2020-09-17	Emilie Briscoe	24.8978	1.97752	24.5906			24.1747			24.5906			24.1747			24.5906			24.1747
Sample	Sample Osteogenic	Chimpanzee	Chimpanzee Osteogenic	C4	C4 Osteogenic	C40210	C40210 Osteogenic	C40210 Osteogenic - GUSB	Osteogenic	GUSB	1	C4O2	study-collection-qPCR-C4 - plate1	2020-09-17	Emilie Briscoe	26.2025	1.97752	24.5906			24.1747			24.5906			24.1747			24.5906			24.1747
Sample	Sample Osteogenic	Chimpanzee	Chimpanzee Osteogenic	C4	C4 Osteogenic	C40210	C40210 Osteogenic	C40210 Osteogenic - GUSB	Osteogenic	GUSB	2	C4O2	study-collection-qPCR-C4 - plate1	2020-09-17	Emilie Briscoe	24.8529	1.97752	24.5906			24.1747			24.5906			24.1747			24.5906			24.1747
Sample	Sample Osteogenic	Chimpanzee	Chimpanzee Osteogenic	C4	C4 Osteogenic	C40210	C40210 Osteogenic	C40210 Osteogenic - GUSB	Osteogenic	GUSB	3	C4O2	study-collection-qPCR-C4 - plate1	2020-09-17	Emilie Briscoe	25.2007	1.97752	24.5906			24.1747			24.5906			24.1747			24.5906			24.1747
Sample	Sample iPSC	Chimpanzee	Chimpanzee iPSC	C4	C4 iPSC	C40210	C40210 iPSC	C40210 iPSC - GUSB	iPSC	GUSB	1	C4I2	study-collection-qPCR-C4 - plate2	2020-09-22	Emilie Briscoe	25.628	2.03438	25.2684			24.8575			25.2684			24.8575			25.2684			24.8575
Sample	Sample iPSC	Chimpanzee	Chimpanzee iPSC	C4	C4 iPSC	C40210	C40210 iPSC	C40210 iPSC - GUSB	iPSC	GUSB	2	C4I2	study-collection-qPCR-C4 - plate2	2020-09-22	Emilie Briscoe	25.3894	2.03438	25.2684			24.8575			25.2684			24.8575			25.2684			24.8575
Sample	Sample iPSC	Chimpanzee	Chimpanzee iPSC	C4	C4 iPSC	C40210	C40210 iPSC	C40210 iPSC - GUSB	iPSC	GUSB	3	C4I2	study-collection-qPCR-C4 - plate2	2020-09-22	Emilie Briscoe	24.7879	2.03438	25.2684			24.8575			25.2684			24.8575			25.2684			24.8575
Sample	Sample MSC	Chimpanzee	Chimpanzee MSC	C4	C4 MSC	C40210	C40210 MSC	C40210 MSC - GUSB	MSC	GUSB	1	C4M2	study-collection-qPCR-C4 - plate2	2020-09-22	Emilie Briscoe	25.3399	2.03438	25.2684			24.8575			25.2684			24.8575			25.2684			24.8575
Sample	Sample MSC	Chimpanzee	Chimpanzee MSC	C4	C4 MSC	C40210	C40210 MSC	C40210 MSC - GUSB	MSC	GUSB	2	C4M2	study-collection-qPCR-C4 - plate2	2020-09-22	Emilie Briscoe	24.5803	2.03438	25.2684			24.8575			25.2684			24.8575			25.2684			24.8575
Sample	Sample MSC	Chimpanzee	Chimpanzee MSC	C4	C4 MSC	C40210	C40210 MSC	C40210 MSC - GUSB	MSC	GUSB	3	C4M2	study-collection-qPCR-C4 - plate2	2020-09-22	Emilie Briscoe	24.6523	2.03438	25.2684			24.8575			25.2684			24.8575			25.2684			24.8575
Sample	Sample Adipogenic	Chimpanzee	Chimpanzee Adipogenic	C4	C4 Adipogenic	C40210	C40210 Adipogenic	C40210 Adipogenic - GUSB	Adipogenic	GUSB	1	C4A2	study-collection-qPCR-C4 - plate2	2020-09-22	Emilie Briscoe	23.8304	2.03438	25.2684			24.8575			25.2684			24.8575			25.2684			24.8575
Sample	Sample Adipogenic	Chimpanzee	Chimpanzee Adipogenic	C4	C4 Adipogenic	C40210	C40210 Adipogenic	C40210 Adipogenic - GUSB	Adipogenic	GUSB	2	C4A2	study-collection-qPCR-C4 - plate2	2020-09-22	Emilie Briscoe	23.5643	2.03438	25.2684			24.8575			25.2684			24.8575			25.2684			24.8575
Sample	Sample Adipogenic	Chimpanzee	Chimpanzee Adipogenic	C4	C4 Adipogenic	C40210	C40210 Adipogenic	C40210 Adipogenic - GUSB	Adipogenic	GUSB	3	C4A2	study-collection-qPCR-C4 - plate2	2020-09-22	Emilie Briscoe	23.4629	2.03438	25.2684			24.8575			25.2684			24.8575			25.2684			24.8575
Sample	Sample Chondrogenic	Chimpanzee	Chimpanzee Chondrogenic	C4	C4 Chondrogenic	C40210	C40210 Chondrogenic	C40210 Chondrogenic - GUSB	Chondrogenic	GUSB	1	C4C2	study-collection-qPCR-C4 - plate2	2020-09-22	Emilie Briscoe	25.3609	2.03438	25.2684			24.8575			25.2684			24.8575			25.2684			24.8575
Sample	Sample Chondrogenic	Chimpanzee	Chimpanzee Chondrogenic	C4	C4 Chondrogenic	C40210	C40210 Chondrogenic	C40210 Chondrogenic - GUSB	Chondrogenic	GUSB	2	C4C2	study-collection-qPCR-C4 - plate2	2020-09-22	Emilie Briscoe	25.0673	2.03438	25.2684			24.8575			25.2684			24.8575			25.2684			24.8575
Sample	Sample Chondrogenic	Chimpanzee	Chimpanzee Chondrogenic	C4	C4 Chondrogenic	C40210	C40210 Chondrogenic	C40210 Chondrogenic - GUSB	Chondrogenic	GUSB	3	C4C2	study-collection-qPCR-C4 - plate2	2020-09-22	Emilie Briscoe	25.0985	2.03438	25.2684			24.8575			25.2684			24.8575			25.2684			24.8575
Sample	Sample Osteogenic	Chimpanzee	Chimpanzee Osteogenic	C4	C4 Osteogenic	C40210	C40210 Osteogenic	C40210 Osteogenic - GUSB	Osteogenic	GUSB	1	C4O2	study-collection-qPCR-C4 - plate2	2020-09-22	Emilie Briscoe	26.5537	2.03438	25.2684			24.8575			25.2684			24.8575			25.2684			24.8575
Sample	Sample Osteogenic	Chimpanzee	Chimpanzee Osteogenic	C4	C4 Osteogenic	C40210	C40210 Osteogenic	C40210 Osteogenic - GUSB	Osteogenic	GUSB	2	C4O2	study-collection-qPCR-C4 - plate2	2020-09-22	Emilie Briscoe	24.5968	2.03438	25.2684			24.8575			25.2684			24.8575			25.2684			24.8575
Sample	Sample Osteogenic	Chimpanzee	Chimpanzee Osteogenic	C4	C4 Osteogenic	C40210	C40210 Osteogenic	C40210 Osteogenic - GUSB	Osteogenic	GUSB	3	C4O2	study-collection-qPCR-C4 - plate2	2020-09-22	Emilie Briscoe	24.8415	2.03438	25.2684			24.8575			25.2684			24.8575			25.2684			24.8575
Sample	Sample iPSC	Chimpanzee	Chimpanzee iPSC	C5	C5 iPSC	C40280	C40280 iPSC	C40280 iPSC - GUSB	iPSC	GUSB	1	C5I2	study-collection-qPCR-C5 - plate1	2020-09-30	Emilie Briscoe	25.6073	1.98016	25.2822			25.8949			25.2822			25.8949			25.2822			25.8949
Sample	Sample iPSC	Chimpanzee	Chimpanzee iPSC	C5	C5 iPSC	C40280	C40280 iPSC	C40280 iPSC - GUSB	iPSC	GUSB	2	C5I2	study-collection-qPCR-C5 - plate1	2020-09-30	Emilie Briscoe	24.7451	1.98016	25.2822			25.8949			25.2822			25.8949			25.2822			25.8949
Sample	Sample iPSC	Chimpanzee	Chimpanzee iPSC	C5	C5 iPSC	C40280	C40280 iPSC	C40280 iPSC - GUSB	iPSC	GUSB	3	C5I2	study-collection-qPCR-C5 - plate1	2020-09-30	Emilie Briscoe	25.4942	1.98016	25.2822			25.8949			25.2822			25.8949			25.2822			25.8949
Sample	Sample MSC	Chimpanzee	Chimpanzee MSC	C5	C5 MSC	C40280	C40280 MSC	C40280 MSC - GUSB	MSC	GUSB	1	C5M2	study-collection-qPCR-C5 - plate1	2020-09-30	Emilie Briscoe	26.26	1.98016	25.2822			25.8949			25.2822			25.8949			25.2822			25.8949
Sample	Sample MSC	Chimpanzee	Chimpanzee MSC	C5	C5 MSC	C40280	C40280 MSC	C40280 MSC - GUSB	MSC	GUSB	2	C5M2	study-collection-qPCR-C5 - plate1	2020-09-30	Emilie Briscoe	25.4323	1.98016	25.2822			25.8949			25.2822			25.8949			25.2822			25.8949
Sample	Sample MSC	Chimpanzee	Chimpanzee MSC	C5	C5 MSC	C40280	C40280 MSC	C40280 MSC - GUSB	MSC	GUSB	3	C5M2	study-collection-qPCR-C5 - plate1	2020-09-30	Emilie Briscoe	25.9924	1.98016	25.2822			25.8949			25.2822			25.8949			25.2822			25.8949
Sample	Sample Adipogenic	Chimpanzee	Chimpanzee Adipogenic	C5	C5 Adipogenic	C40280	C40280 Adipogenic	C40280 Adipogenic - GUSB	Adipogenic	GUSB	1	C5A2	study-collection-qPCR-C5 - plate1	2020-09-30	Emilie Briscoe	25.9775	1.98016	25.2822			25.8949			25.2822			25.8949			25.2822			25.8949
Sample	Sample Adipogenic	Chimpanzee	Chimpanzee Adipogenic	C5	C5 Adipogenic	C40280	C40280 Adipogenic	C40280 Adipogenic - GUSB	Adipogenic	GUSB	2	C5A2	study-collection-qPCR-C5 - plate1	2020-09-30	Emilie Briscoe	24.0971	1.98016	25.2822			25.8949			25.2822			25.8949			25.2822			25.8949
Sample	Sample Adipogenic	Chimpanzee	Chimpanzee Adipogenic	C5	C5 Adipogenic	C40280	C40280 Adipogenic	C40280 Adipogenic - GUSB	Adipogenic	GUSB	3	C5A2	study-collection-qPCR-C5 - plate1	2020-09-30	Emilie Briscoe	24.5373	1.98016	25.2822			25.8949			25.2822			25.8949			25.2822			25.8949
Sample	Sample Chondrogenic	Chimpanzee	Chimpanzee Chondrogenic	C5	C5 Chondrogenic	C40280	C40280 Chondrogenic	C40280 Chondrogenic - GUSB	Chondrogenic	GUSB	1	C5C2	study-collection-qPCR-C5 - plate1	2020-09-30	Emilie Briscoe	26.4837	1.98016	25.2822			25.8949			25.2822			25.8949			25.2822			25.8949
Sample	Sample Chondrogenic	Chimpanzee	Chimpanzee Chondrogenic	C5	C5 Chondrogenic	C40280	C40280 Chondrogenic	C40280 Chondrogenic - GUSB	Chondrogenic	GUSB	2	C5C2	study-collection-qPCR-C5 - plate1	2020-09-30	Emilie Briscoe	24.9936	1.98016	25.2822			25.8949			25.2822			25.8949			25.2822			25.8949
Sample	Sample Chondrogenic	Chimpanzee	Chimpanzee Chondrogenic	C5	C5 Chondrogenic	C40280	C40280 Chondrogenic	C40280 Chondrogenic - GUSB	Chondrogenic	GUSB	3	C5C2	study-collection-qPCR-C5 - plate1	2020-09-30	Emilie Briscoe	25.0641	1.98016	25.2822			25.8949			25.2822			25.8949			25.2822			25.8949
Sample	Sample Osteogenic	Chimpanzee	Chimpanzee Osteogenic	C5	C5 Osteogenic	C40280	C40280 Osteogenic	C40280 Osteogenic - GUSB	Osteogenic	GUSB	1	C5O2	study-collection-qPCR-C5 - plate1	2020-09-30	Emilie Briscoe	28.6505	1.98016	25.2822			25.8949			25.2822			25.8949			25.2822			25.8949
Sample	Sample Osteogenic	Chimpanzee	Chimpanzee Osteogenic	C5	C5 Osteogenic	C40280	C40280 Osteogenic	C40280 Osteogenic - GUSB	Osteogenic	GUSB	2	C5O2	study-collection-qPCR-C5 - plate1	2020-09-30	Emilie Briscoe	28.4096	1.98016	25.2822			25.8949			25.2822			25.8949			25.2822			25.8949
Sample	Sample Osteogenic	Chimpanzee	Chimpanzee Osteogenic	C5	C5 Osteogenic	C40280	C40280 Osteogenic	C40280 Osteogenic - GUSB	Osteogenic	GUSB	3	C5O2	study-collection-qPCR-C5 - plate1	2020-09-30	Emilie Briscoe	28.4983	1.98016	25.2822			25.8949			25.2822			25.8949			25.2822			25.8949
Sample	Sample iPSC	Chimpanzee	Chimpanzee iPSC	C5	C5 iPSC	C40280	C40280 iPSC	C40280 iPSC - GUSB	iPSC	GUSB	1	C5I2	study-collection-qPCR-C5 - plate2	2020-10-06	Emilie Briscoe	25.0504	2.05422	24.6066			25.4185			24.6066			25.4185			24.6066			25.4185
Sample	Sample iPSC	Chimpanzee	Chimpanzee iPSC	C5	C5 iPSC	C40280	C40280 iPSC	C40280 iPSC - GUSB	iPSC	GUSB	2	C5I2	study-collection-qPCR-C5 - plate2	2020-10-06	Emilie Briscoe	24.3843	2.05422	24.6066			25.4185			24.6066			25.4185			24.6066			25.4185
Sample	Sample iPSC	Chimpanzee	Chimpanzee iPSC	C5	C5 iPSC	C40280	C40280 iPSC	C40280 iPSC - GUSB	iPSC	GUSB	3	C5I2	study-collection-qPCR-C5 - plate2	2020-10-06	Emilie Briscoe	24.3851	2.05422	24.6066			25.4185			24.6066			25.4185			24.6066			25.4185
Sample	Sample MSC	Chimpanzee	Chimpanzee MSC	C5	C5 MSC	C40280	C40280 MSC	C40280 MSC - GUSB	MSC	GUSB	1	C5M2	study-collection-qPCR-C5 - plate2	2020-10-06	Emilie Briscoe	26.1548	2.05422	24.6066			25.4185			24.6066			25.4185			24.6066			25.4185
Sample	Sample MSC	Chimpanzee	Chimpanzee MSC	C5	C5 MSC	C40280	C40280 MSC	C40280 MSC - GUSB	MSC	GUSB	2	C5M2	study-collection-qPCR-C5 - plate2	2020-10-06	Emilie Briscoe	25.4131	2.05422	24.6066			25.4185			24.6066			25.4185			24.6066			25.4185
Sample	Sample MSC	Chimpanzee	Chimpanzee MSC	C5	C5 MSC	C40280	C40280 MSC	C40280 MSC - GUSB	MSC	GUSB	3	C5M2	study-collection-qPCR-C5 - plate2	2020-10-06	Emilie Briscoe	24.6876	2.05422	24.6066			25.4185			24.6066			25.4185			24.6066			25.4185
Sample	Sample Adipogenic	Chimpanzee	Chimpanzee Adipogenic	C5	C5 Adipogenic	C40280	C40280 Adipogenic	C40280 Adipogenic - GUSB	Adipogenic	GUSB	1	C5A2	study-collection-qPCR-C5 - plate2	2020-10-06	Emilie Briscoe	24.8818	2.05422	24.6066			25.4185			24.6066			25.4185			24.6066			25.4185
Sample	Sample Adipogenic	Chimpanzee	Chimpanzee Adipogenic	C5	C5 Adipogenic	C40280	C40280 Adipogenic	C40280 Adipogenic - GUSB	Adipogenic	GUSB	2	C5A2	study-collection-qPCR-C5 - plate2	2020-10-06	Emilie Briscoe	24.9843	2.05422	24.6066			25.4185			24.6066			25.4185			24.6066			25.4185
Sample	Sample Adipogenic	Chimpanzee	Chimpanzee Adipogenic	C5	C5 Adipogenic	C40280	C40280 Adipogenic	C40280 Adipogenic - GUSB	Adipogenic	GUSB	3	C5A2	study-collection-qPCR-C5 - plate2	2020-10-06	Emilie Briscoe	23.5296	2.05422	24.6066			25.4185			24.6066			25.4185			24.6066			25.4185
Sample	Sample Chondrogenic	Chimpanzee	Chimpanzee Chondrogenic	C5	C5 Chondrogenic	C40280	C40280 Chondrogenic	C40280 Chondrogenic - GUSB	Chondrogenic	GUSB	1	C5C2	study-collection-qPCR-C5 - plate2	2020-10-06	Emilie Briscoe	25.7961	2.05422	24.6066			25.4185			24.6066			25.4185			24.6066			25.4185
Sample	Sample Chondrogenic	Chimpanzee	Chimpanzee Chondrogenic	C5	C5 Chondrogenic	C40280	C40280 Chondrogenic	C40280 Chondrogenic - GUSB	Chondrogenic	GUSB	2	C5C2	study-collection-qPCR-C5 - plate2	2020-10-06	Emilie Briscoe	25.5954	2.05422	24.6066			25.4185			24.6066			25.4185			24.6066			25.4185
Sample	Sample Chondrogenic	Chimpanzee	Chimpanzee Chondrogenic	C5	C5 Chondrogenic	C40280	C40280 Chondrogenic	C40280 Chondrogenic - GUSB	Chondrogenic	GUSB	3	C5C2	study-collection-qPCR-C5 - plate2	2020-10-06	Emilie Briscoe	25.1693	2.05422	24.6066			25.4185			24.6066			25.4185			24.6066			25.4185
Sample	Sample Osteogenic	Chimpanzee	Chimpanzee Osteogenic	C5	C5 Osteogenic	C40280	C40280 Osteogenic	C40280 Osteogenic - GUSB	Osteogenic	GUSB	1	C5O2	study-collection-qPCR-C5 - plate2	2020-10-06	Emilie Briscoe	25.9226	2.05422	24.6066			25.4185			24.6066			25.4185			24.6066			25.4185
Sample	Sample Osteogenic	Chimpanzee	Chimpanzee Osteogenic	C5	C5 Osteogenic	C40280	C40280 Osteogenic	C40280 Osteogenic - GUSB	Osteogenic	GUSB	2	C5O2	study-collection-qPCR-C5 - plate2	2020-10-06	Emilie Briscoe	25.8395	2.05422	24.6066			25.4185			24.6066			25.4185			24.6066			25.4185
Sample	Sample Osteogenic	Chimpanzee	Chimpanzee Osteogenic	C5	C5 Osteogenic	C40280	C40280 Osteogenic	C40280 Osteogenic - GUSB	Osteogenic	GUSB	3	C5O2	study-collection-qPCR-C5 - plate2	2020-10-06	Emilie Briscoe	25.5927	2.05422	24.6066			25.4185			24.6066			25.4185			24.6066			25.4185
Sample	Sample iPSC	Chimpanzee	Chimpanzee iPSC	C6	C6 iPSC	C3624	C3624 iPSC	C3624 iPSC - GUSB	iPSC	GUSB	1	C6I2	study-collection-qPCR-C6 - plate1	2020-10-16	Emilie Briscoe	25.0629	2.05612	24.5482			25.2117			24.5482			25.2117			24.5482			25.2117
Sample	Sample iPSC	Chimpanzee	Chimpanzee iPSC	C6	C6 iPSC	C3624	C3624 iPSC	C3624 iPSC - GUSB	iPSC	GUSB	2	C6I2	study-collection-qPCR-C6 - plate1	2020-10-16	Emilie Briscoe	24.3228	2.05612	24.5482			25.2117			24.5482			25.2117			24.5482			25.2117
Sample	Sample iPSC	Chimpanzee	Chimpanzee iPSC	C6	C6 iPSC	C3624	C3624 iPSC	C3624 iPSC - GUSB	iPSC	GUSB	3	C6I2	study-collection-qPCR-C6 - plate1	2020-10-16	Emilie Briscoe	24.2589	2.05612	24.5482			25.2117			24.5482			25.2117			24.5482			25.2117
Sample	Sample MSC	Chimpanzee	Chimpanzee MSC	C6	C6 MSC	C3624	C3624 MSC	C3624 MSC - GUSB	MSC	GUSB	1	C6M2	study-collection-qPCR-C6 - plate1	2020-10-16	Emilie Briscoe	25.9702	2.05612	24.5482			25.2117			24.5482			25.2117			24.5482			25.2117
Sample	Sample MSC	Chimpanzee	Chimpanzee MSC	C6	C6 MSC	C3624	C3624 MSC	C3624 MSC - GUSB	MSC	GUSB	2	C6M2	study-collection-qPCR-C6 - plate1	2020-10-16	Emilie Briscoe	24.9757	2.05612	24.5482			25.2117			24.5482			25.2117			24.5482			25.2117
Sample	Sample MSC	Chimpanzee	Chimpanzee MSC	C6	C6 MSC	C3624	C3624 MSC	C3624 MSC - GUSB	MSC	GUSB	3	C6M2	study-collection-qPCR-C6 - plate1	2020-10-16	Emilie Briscoe	24.6893	2.05612	24.5482			25.2117			24.5482			25.2117			24.5482			25.2117
Sample	Sample Adipogenic	Chimpanzee	Chimpanzee Adipogenic	C6	C6 Adipogenic	C3624	C3624 Adipogenic	C3624 Adipogenic - GUSB	Adipogenic	GUSB	1	C6A1	study-collection-qPCR-C6 - plate1	2020-10-16	Emilie Briscoe	24.5611	2.05612	24.5482			25.2117			24.5482			25.2117			24.5482			25.2117
Sample	Sample Adipogenic	Chimpanzee	Chimpanzee Adipogenic	C6	C6 Adipogenic	C3624	C3624 Adipogenic	C3624 Adipogenic - GUSB	Adipogenic	GUSB	2	C6A1	study-collection-qPCR-C6 - plate1	2020-10-16	Emilie Briscoe	23.4086	2.05612	24.5482			25.2117			24.5482			25.2117			24.5482			25.2117
Sample	Sample Adipogenic	Chimpanzee	Chimpanzee Adipogenic	C6	C6 Adipogenic	C3624	C3624 Adipogenic	C3624 Adipogenic - GUSB	Adipogenic	GUSB	3	C6A1	study-collection-qPCR-C6 - plate1	2020-10-16	Emilie Briscoe	23.5412	2.05612	24.5482			25.2117			24.5482			25.2117			24.5482			25.2117
Sample	Sample Osteogenic	Chimpanzee	Chimpanzee Osteogenic	C6	C6 Osteogenic	C3624	C3624 Osteogenic	C3624 Osteogenic - GUSB	Osteogenic	GUSB	1	C6O2	study-collection-qPCR-C6 - plate1	2020-10-16	Emilie Briscoe	28.5044	2.05612	24.5482			25.2117			24.5482			25.2117			24.5482			25.2117
Sample	Sample Osteogenic	Chimpanzee	Chimpanzee Osteogenic	C6	C6 Osteogenic	C3624	C3624 Osteogenic	C3624 Osteogenic - GUSB	Osteogenic	GUSB	2	C6O2	study-collection-qPCR-C6 - plate1	2020-10-16	Emilie Briscoe	25.7811	2.05612	24.5482			25.2117			24.5482			25.2117			24.5482			25.2117
Sample	Sample Osteogenic	Chimpanzee	Chimpanzee Osteogenic	C6	C6 Osteogenic	C3624	C3624 Osteogenic	C3624 Osteogenic - GUSB	Osteogenic	GUSB	3	C6O2	study-collection-qPCR-C6 - plate1	2020-10-16	Emilie Briscoe	25.1795	2.05612	24.5482			25.2117			24.5482			25.2117			24.5482			25.2117
Sample	Sample iPSC	Chimpanzee	Chimpanzee iPSC	C6	C6 iPSC	C3624	C3624 iPSC	C3624 iPSC - GUSB	iPSC	GUSB	1	C6I2	study-collection-qPCR-C6 - plate2	2020-10-21	Emilie Briscoe	27.4863	2.04701	25.7149			26.2971			25.7149			26.2971			25.7149			26.2971
Sample	Sample iPSC	Chimpanzee	Chimpanzee iPSC	C6	C6 iPSC	C3624	C3624 iPSC	C3624 iPSC - GUSB	iPSC	GUSB	2	C6I2	study-collection-qPCR-C6 - plate2	2020-10-21	Emilie Briscoe	25.2425	2.04701	25.7149			26.2971			25.7149			26.2971			25.7149			26.2971
Sample	Sample iPSC	Chimpanzee	Chimpanzee iPSC	C6	C6 iPSC	C3624	C3624 iPSC	C3624 iPSC - GUSB	iPSC	GUSB	3	C6I2	study-collection-qPCR-C6 - plate2	2020-10-21	Emilie Briscoe	24.4159	2.04701	25.7149			26.2971			25.7149			26.2971			25.7149			26.2971
Sample	Sample MSC	Chimpanzee	Chimpanzee MSC	C6	C6 MSC	C3624	C3624 MSC	C3624 MSC - GUSB	MSC	GUSB	1	C6M2	study-collection-qPCR-C6 - plate2	2020-10-21	Emilie Briscoe	27.8209	2.04701	25.7149			26.2971			25.7149			26.2971			25.7149			26.2971
Sample	Sample MSC	Chimpanzee	Chimpanzee MSC	C6	C6 MSC	C3624	C3624 MSC	C3624 MSC - GUSB	MSC	GUSB	2	C6M2	study-collection-qPCR-C6 - plate2	2020-10-21	Emilie Briscoe	25.3862	2.04701	25.7149			26.2971			25.7149			26.2971			25.7149			26.2971
Sample	Sample MSC	Chimpanzee	Chimpanzee MSC	C6	C6 MSC	C3624	C3624 MSC	C3624 MSC - GUSB	MSC	GUSB	3	C6M2	study-collection-qPCR-C6 - plate2	2020-10-21	Emilie Briscoe	25.6841	2.04701	25.7149			26.2971			25.7149			26.2971			25.7149			26.2971
Sample	Sample Adipogenic	Chimpanzee	Chimpanzee Adipogenic	C6	C6 Adipogenic	C3624	C3624 Adipogenic	C3624 Adipogenic - GUSB	Adipogenic	GUSB	1	C6A1	study-collection-qPCR-C6 - plate2	2020-10-21	Emilie Briscoe	25.2981	2.04701	25.7149			26.2971			25.7149			26.2971			25.7149			26.2971
Sample	Sample Adipogenic	Chimpanzee	Chimpanzee Adipogenic	C6	C6 Adipogenic	C3624	C3624 Adipogenic	C3624 Adipogenic - GUSB	Adipogenic	GUSB	2	C6A1	study-collection-qPCR-C6 - plate2	2020-10-21	Emilie Briscoe	23.9664	2.04701	25.7149			26.2971			25.7149			26.2971			25.7149			26.2971
Sample	Sample Adipogenic	Chimpanzee	Chimpanzee Adipogenic	C6	C6 Adipogenic	C3624	C3624 Adipogenic	C3624 Adipogenic - GUSB	Adipogenic	GUSB	3	C6A1	study-collection-qPCR-C6 - plate2	2020-10-21	Emilie Briscoe	24.0263	2.04701	25.7149			26.2971			25.7149			26.2971			25.7149			26.2971
Sample	Sample Osteogenic	Chimpanzee	Chimpanzee Osteogenic	C6	C6 Osteogenic	C3624	C3624 Osteogenic	C3624 Osteogenic - GUSB	Osteogenic	GUSB	1	C6O2	study-collection-qPCR-C6 - plate2	2020-10-21	Emilie Briscoe	26.4133	2.04701	25.7149			26.2971			25.7149			26.2971			25.7149			26.2971
Sample	Sample Osteogenic	Chimpanzee	Chimpanzee Osteogenic	C6	C6 Osteogenic	C3624	C3624 Osteogenic	C3624 Osteogenic - GUSB	Osteogenic	GUSB	2	C6O2	study-collection-qPCR-C6 - plate2	2020-10-21	Emilie Briscoe	25.293	2.04701	25.7149			26.2971			25.7149			26.2971			25.7149			26.2971
Sample	Sample Osteogenic	Chimpanzee	Chimpanzee Osteogenic	C6	C6 Osteogenic	C3624	C3624 Osteogenic	C3624 Osteogenic - GUSB	Osteogenic	GUSB	3	C6O2	study-collection-qPCR-C6 - plate2	2020-10-21	Emilie Briscoe	25.0475	2.04701	25.7149			26.2971			25.7149			26.2971			25.7149			26.2971
Sample	Sample iPSC	Human	Human iPSC	H1	H1 iPSC	H23555	H23555 iPSC	H23555 iPSC - ACAN	iPSC	ACAN	1	H1I2	study-collection-qPCR-H1	2020-06-24	Emilie Briscoe	27.8856	1.9165							27.6962	1.21209	0.083534	32.4626	8.20426	0.914039
Sample	Sample iPSC	Human	Human iPSC	H1	H1 iPSC	H23555	H23555 iPSC	H23555 iPSC - ACAN	iPSC	ACAN	2	H1I2	study-collection-qPCR-H1	2020-06-24	Emilie Briscoe	27.5068	1.9165							27.6962	1.00348	0.00150709	32.4626	6.79223	0.832012
Sample	Sample MSC	Human	Human MSC	H1	H1 MSC	H23555	H23555 MSC	H23555 MSC - ACAN	MSC	ACAN	1	H1M2	study-collection-qPCR-H1	2020-06-24	Emilie Briscoe	32.1238	1.9165							27.6962	0.246757	-0.60773	32.4626	1.67022	0.222775
Sample	Sample MSC	Human	Human MSC	H1	H1 MSC	H23555	H23555 MSC	H23555 MSC - ACAN	MSC	ACAN	2	H1M2	study-collection-qPCR-H1	2020-06-24	Emilie Briscoe	32.8014	1.9165							27.6962	0.114204	-0.942319	32.4626	0.773011	-0.111814
Sample	Sample Adipogenic	Human	Human Adipogenic	H1	H1 Adipogenic	H23555	H23555 Adipogenic	H23555 Adipogenic - ACAN	Adipogenic	ACAN	1	H1A1	study-collection-qPCR-H1	2020-06-24	Emilie Briscoe	31.7701	1.9165							27.6962	0.117592	-0.929622	32.4626	0.795946	-0.0991166
Sample	Sample Adipogenic	Human	Human Adipogenic	H1	H1 Adipogenic	H23555	H23555 Adipogenic	H23555 Adipogenic - ACAN	Adipogenic	ACAN	2	H1A1	study-collection-qPCR-H1	2020-06-24	Emilie Briscoe	32.9703	1.9165							27.6962	0.0365093	-1.4376	32.4626	0.247121	-0.607091
Sample	Sample Chondrogenic	Human	Human Chondrogenic	H1	H1 Chondrogenic	H23555	H23555 Chondrogenic	H23555 Chondrogenic - ACAN	Chondrogenic	ACAN	1	H1C2	study-collection-qPCR-H1	2020-06-24	Emilie Briscoe	30.6861	1.9165							27.6962	0.285029	-0.545112	32.4626	1.92927	0.285394
Sample	Sample Chondrogenic	Human	Human Chondrogenic	H1	H1 Chondrogenic	H23555	H23555 Chondrogenic	H23555 Chondrogenic - ACAN	Chondrogenic	ACAN	2	H1C2	study-collection-qPCR-H1	2020-06-24	Emilie Briscoe	31.9693	1.9165							27.6962	0.0761329	-1.11843	32.4626	0.515321	-0.287922
Sample	Sample Chondrogenic	Human	Human Chondrogenic	H1	H1 Chondrogenic	H23555	H23555 Chondrogenic	H23555 Chondrogenic - ACAN	Chondrogenic	ACAN	3	H1C2	study-collection-qPCR-H1	2020-06-24	Emilie Briscoe	30.5672	1.9165							27.6962	0.130292	-0.885081	32.4626	0.88191	-0.0545758
Sample	Sample iPSC	Human	Human iPSC	H1-r2	H1-r2 iPSC	H23555	H23555 iPSC	H23555 iPSC - ACAN	iPSC	ACAN		H1Ir2	study-collection-qPCR-H1r - plate1	2020-10-26	Emilie Briscoe	29.9221	1.74113	29.1551	1.01102	0.00476035	34.575	24.8281	1.39494	29.1551	1.50604	0.177835	34.575	26.8716	1.42929	29.1551	1.228	0.0891968	34.575	25.8193	1.41194
Sample	Sample iPSC	Human	Human iPSC	H1-r2	H1-r2 iPSC	H23555	H23555 iPSC	H23555 iPSC - ACAN	iPSC	ACAN		H1Ir2	study-collection-qPCR-H1r - plate1	2020-10-26	Emilie Briscoe	28.714	1.74113	29.1551	1.26159	0.100917	34.575	30.9813	1.4911	29.1551	0.975621	-0.0107188	34.575	17.4076	1.24074	29.1551	1.1132	0.046574	34.575	23.4057	1.36932
Sample	Sample iPSC	Human	Human iPSC	H1-r2	H1-r2 iPSC	H23555	H23555 iPSC	H23555 iPSC - ACAN	iPSC	ACAN		H1Ir2	study-collection-qPCR-H1r - plate1	2020-10-26	Emilie Briscoe	28.8294	1.74113	29.1551	0.784012	-0.105677	34.575	19.2533	1.28451	29.1551	0.680587	-0.167116	34.575	12.1434	1.08434	29.1551	0.731525	-0.135771	34.575	15.3807	1.18698
Sample	Sample MSC	Human	Human MSC	H1-r2	H1-r2 MSC	H23555	H23555 MSC	H23555 MSC - ACAN	MSC	ACAN		H1Mr2	study-collection-qPCR-H1r - plate1	2020-10-26	Emilie Briscoe	33.5666	1.74113	29.1551	0.136556	-0.864689	34.575	3.35347	0.525494	29.1551	0.167527	-0.775916	34.575	2.98911	0.475542	29.1551	0.150912	-0.821277	34.575	3.173	0.50147
Sample	Sample MSC	Human	Human MSC	H1-r2	H1-r2 MSC	H23555	H23555 MSC	H23555 MSC - ACAN	MSC	ACAN		H1Mr2	study-collection-qPCR-H1r - plate1	2020-10-26	Emilie Briscoe	35.7315	1.74113	29.1551	0.0140466	-1.85243	34.575	0.34495	-0.462244	29.1551	0.0206438	-1.68521	34.575	0.368339	-0.433752	29.1551	0.0169312	-1.77131	34.575	0.355988	-0.448564
Sample	Sample MSC	Human	Human MSC	H1-r2	H1-r2 MSC	H23555	H23555 MSC	H23555 MSC - ACAN	MSC	ACAN		H1Mr2	study-collection-qPCR-H1r - plate1	2020-10-26	Emilie Briscoe	34.427	1.74113	29.1551	0.035202	-1.45343	34.575	0.864471	-0.0632494	29.1551	0.050904	-1.29325	34.575	0.90826	-0.0417898	29.1551	0.0421064	-1.37565	34.575	0.885308	-0.0529055
Sample	Sample Adipogenic	Human	Human Adipogenic	H1-r2	H1-r2 Adipogenic	H23555	H23555 Adipogenic	H23555 Adipogenic - ACAN	Adipogenic	ACAN		H1Ar2	study-collection-qPCR-H1r - plate1	2020-10-26	Emilie Briscoe	32.3791	1.74113	29.1551	0.148143	-0.829319	34.575	3.63801	0.560864	29.1551	0.516224	-0.287161	34.575	9.21079	0.964297	29.1551	0.271967	-0.565483	34.575	5.71826	0.757264
Sample	Sample Adipogenic	Human	Human Adipogenic	H1-r2	H1-r2 Adipogenic	H23555	H23555 Adipogenic	H23555 Adipogenic - ACAN	Adipogenic	ACAN		H1Ar2	study-collection-qPCR-H1r - plate1	2020-10-26	Emilie Briscoe	32.02	1.74113	29.1551	0.115548	-0.937238	34.575	2.83756	0.452945	29.1551	0.146363	-0.83457	34.575	2.61149	0.416888	29.1551	0.129563	-0.887518	34.575	2.72413	0.435229
Sample	Sample Adipogenic	Human	Human Adipogenic	H1-r2	H1-r2 Adipogenic	H23555	H23555 Adipogenic	H23555 Adipogenic - ACAN	Adipogenic	ACAN		H1Ar2	study-collection-qPCR-H1r - plate1	2020-10-26	Emilie Briscoe	32.0991	1.74113	29.1551	0.0994942	-1.0022	34.575	2.44332	0.387981	29.1551	0.2957	-0.529149	34.575	5.27606	0.722309	29.1551	0.168947	-0.772249	34.575	3.55221	0.550498
Sample	Sample Chondrogenic	Human	Human Chondrogenic	H1-r2	H1-r2 Chondrogenic	H23555	H23555 Chondrogenic	H23555 Chondrogenic - ACAN	Chondrogenic	ACAN		H1Cr2	study-collection-qPCR-H1r - plate1	2020-10-26	Emilie Briscoe	35.5898	1.74113	29.1551	5.55795	0.744914	34.575	136.489	2.1351	29.1551	7.70236	0.886624	34.575	137.43	2.13808	29.1551	6.54999	0.81624	34.575	137.717	2.13899
Sample	Sample Chondrogenic	Human	Human Chondrogenic	H1-r2	H1-r2 Chondrogenic	H23555	H23555 Chondrogenic	H23555 Chondrogenic - ACAN	Chondrogenic	ACAN		H1Cr2	study-collection-qPCR-H1r - plate1	2020-10-26	Emilie Briscoe	Undetermined	1.74113	29.1551			34.575			29.1551			34.575			29.1551			34.575
Sample	Sample Chondrogenic	Human	Human Chondrogenic	H1-r2	H1-r2 Chondrogenic	H23555	H23555 Chondrogenic	H23555 Chondrogenic - ACAN	Chondrogenic	ACAN		H1Cr2	study-collection-qPCR-H1r - plate1	2020-10-26	Emilie Briscoe	Undetermined	1.74113	29.1551			34.575			29.1551			34.575			29.1551			34.575
Sample	Sample Osteogenic	Human	Human Osteogenic	H1-r2	H1-r2 Osteogenic	H23555	H23555 Osteogenic	H23555 Osteogenic - ACAN	Osteogenic	ACAN		H1Or2	study-collection-qPCR-H1r - plate1	2020-10-26	Emilie Briscoe	29.4136	1.74113	29.1551	1.57486	0.197242	34.575	38.6745	1.58742	29.1551	1.34421	0.128468	34.575	23.9842	1.37993	29.1551	1.45892	0.164033	34.575	30.6746	1.48678
Sample	Sample Osteogenic	Human	Human Osteogenic	H1-r2	H1-r2 Osteogenic	H23555	H23555 Osteogenic	H23555 Osteogenic - ACAN	Osteogenic	ACAN		H1Or2	study-collection-qPCR-H1r - plate1	2020-10-26	Emilie Briscoe	28.5509	1.74113	29.1551	1.50341	0.177078	34.575	36.9199	1.56726	29.1551	1.17689	0.0707364	34.575	20.9988	1.32219	29.1551	1.3346	0.12535	34.575	28.0606	1.4481
Sample	Sample Osteogenic	Human	Human Osteogenic	H1-r2	H1-r2 Osteogenic	H23555	H23555 Osteogenic	H23555 Osteogenic - ACAN	Osteogenic	ACAN		H1Or2	study-collection-qPCR-H1r - plate1	2020-10-26	Emilie Briscoe	28.5438	1.74113	29.1551	1.58574	0.200231	34.575	38.9416	1.59041	29.1551	1.59715	0.203345	34.575	28.4972	1.4548	29.1551	1.59148	0.201801	34.575	33.4617	1.52455
Sample	Sample iPSC	Human	Human iPSC	H2	H2 iPSC	H20157	H20157 iPSC	H20157 iPSC - ACAN	iPSC	ACAN	1	H2I2	study-collection-qPCR-H2 - plate1	2020-07-28	Emilie Briscoe	31.7873	1.81008	31.5673	1.0781	0.0326602	32.4403	7.34195	0.865811	31.5673	1.08727	0.0363373	32.4403	2.00973	0.303138	31.5673	1.08376	0.0349323	32.4403	3.72552	0.571187
Sample	Sample iPSC	Human	Human iPSC	H2	H2 iPSC	H20157	H20157 iPSC	H20157 iPSC - ACAN	iPSC	ACAN	2	H2I2	study-collection-qPCR-H2 - plate1	2020-07-28	Emilie Briscoe	30.702	1.81008	31.5673	1.35829	0.132994	32.4403	9.25007	0.966145	31.5673	1.53981	0.187468	32.4403	2.84622	0.454268	31.5673	1.45022	0.161434	32.4403	4.98527	0.697689
Sample	Sample iPSC	Human	Human iPSC	H2	H2 iPSC	H20157	H20157 iPSC	H20157 iPSC - ACAN	iPSC	ACAN	3	H2I2	study-collection-qPCR-H2 - plate1	2020-07-28	Emilie Briscoe	32.2125	1.81008	31.5673	0.682882	-0.165654	32.4403	4.65047	0.667497	31.5673	0.597304	-0.223805	32.4403	1.10407	0.0429955	31.5673	0.636258	-0.196367	32.4403	2.1872	0.339888
Sample	Sample MSC	Human	Human MSC	H2	H2 MSC	H20157	H20157 MSC	H20157 MSC - ACAN	MSC	ACAN	1	H2M2	study-collection-qPCR-H2 - plate1	2020-07-28	Emilie Briscoe	32.9408	1.81008	31.5673	0.141623	-0.848868	32.4403	0.964458	-0.0157165	31.5673	0.593745	-0.2264	32.4403	1.09749	0.0403999	31.5673	0.300668	-0.521913	32.4403	1.03357	0.0143417
Sample	Sample MSC	Human	Human MSC	H2	H2 MSC	H20157	H20157 MSC	H20157 MSC - ACAN	MSC	ACAN	2	H2M2	study-collection-qPCR-H2 - plate1	2020-07-28	Emilie Briscoe	32.0083	1.81008	31.5673	0.146539	-0.834047	32.4403	0.99794	-0.00089555	31.5673	0.455581	-0.341435	32.4403	0.842104	-0.0746345	31.5673	0.265147	-0.576513	32.4403	0.911469	-0.0402581
Sample	Sample MSC	Human	Human MSC	H2	H2 MSC	H20157	H20157 MSC	H20157 MSC - ACAN	MSC	ACAN	3	H2M2	study-collection-qPCR-H2 - plate1	2020-07-28	Emilie Briscoe	32.3719	1.81008	31.5673	0.152567	-0.816539	32.4403	1.03899	0.016612	31.5673	0.585375	-0.232566	32.4403	1.08202	0.0342346	31.5673	0.308789	-0.510338	32.4403	1.06149	0.0259163
Sample	Sample Adipogenic	Human	Human Adipogenic	H2	H2 Adipogenic	H20157	H20157 Adipogenic	H20157 Adipogenic - ACAN	Adipogenic	ACAN	1	H2A2	study-collection-qPCR-H2 - plate1	2020-07-28	Emilie Briscoe	30.459	1.81008	31.5673	1.46954	0.167181	32.4403	10.0077	1.00033	31.5673	3.59383	0.555557	32.4403	6.64289	0.822357	31.5673	2.3544	0.371881	32.4403	8.09348	0.908135
Sample	Sample Adipogenic	Human	Human Adipogenic	H2	H2 Adipogenic	H20157	H20157 Adipogenic	H20157 Adipogenic - ACAN	Adipogenic	ACAN	2	H2A2	study-collection-qPCR-H2 - plate1	2020-07-28	Emilie Briscoe	30.0382	1.81008	31.5673	1.76812	0.247511	32.4403	12.041	1.08066	31.5673	4.82307	0.683323	32.4403	8.91505	0.950124	31.5673	3.00028	0.477162	32.4403	10.3138	1.01342
Sample	Sample Adipogenic	Human	Human Adipogenic	H2	H2 Adipogenic	H20157	H20157 Adipogenic	H20157 Adipogenic - ACAN	Adipogenic	ACAN	3	H2A2	study-collection-qPCR-H2 - plate1	2020-07-28	Emilie Briscoe	30.7114	1.81008	31.5673	1.40564	0.147875	32.4403	9.57253	0.981027	31.5673	2.68394	0.428773	32.4403	4.96105	0.695573	31.5673	1.97685	0.295975	32.4403	6.79562	0.832229
Sample	Sample Chondrogenic	Human	Human Chondrogenic	H2	H2 Chondrogenic	H20157	H20157 Chondrogenic	H20157 Chondrogenic - ACAN	Chondrogenic	ACAN	1	H2C2	study-collection-qPCR-H2 - plate1	2020-07-28	Emilie Briscoe	35.8787	1.81008	31.5673	1.16256	0.0654151	32.4403	7.9171	0.898566	31.5673	3.63604	0.560628	32.4403	6.72092	0.827429	31.5673	2.14449	0.331325	32.4403	7.3719	0.867579
Sample	Sample Chondrogenic	Human	Human Chondrogenic	H2	H2 Chondrogenic	H20157	H20157 Chondrogenic	H20157 Chondrogenic - ACAN	Chondrogenic	ACAN	2	H2C2	study-collection-qPCR-H2 - plate1	2020-07-28	Emilie Briscoe	33.8967	1.81008	31.5673	3.98535	0.600467	32.4403	27.1405	1.43362	31.5673	6.3585	0.803355	32.4403	11.7532	1.07015	31.5673	5.15303	0.712062	32.4403	17.714	1.24832
Sample	Sample Chondrogenic	Human	Human Chondrogenic	H2	H2 Chondrogenic	H20157	H20157 Chondrogenic	H20157 Chondrogenic - ACAN	Chondrogenic	ACAN	3	H2C2	study-collection-qPCR-H2 - plate1	2020-07-28	Emilie Briscoe	Undetermined	1.81008	31.5673			32.4403			31.5673			32.4403			31.5673			32.4403
Sample	Sample Osteogenic	Human	Human Osteogenic	H2	H2 Osteogenic	H20157	H20157 Osteogenic	H20157 Osteogenic - ACAN	Osteogenic	ACAN	1	H2O2	study-collection-qPCR-H2 - plate1	2020-07-28	Emilie Briscoe	34.2551	1.81008	31.5673	0.818212	-0.087134	32.4403	5.57208	0.746017	31.5673	0.616014	-0.21041	32.4403	1.13865	0.0563906	31.5673	0.707926	-0.150012	32.4403	2.43356	0.386242
Sample	Sample Osteogenic	Human	Human Osteogenic	H2	H2 Osteogenic	H20157	H20157 Osteogenic	H20157 Osteogenic - ACAN	Osteogenic	ACAN	2	H2O2	study-collection-qPCR-H2 - plate1	2020-07-28	Emilie Briscoe	33.1123	1.81008	31.5673	0.366686	-0.435705	32.4403	2.49716	0.397446	31.5673	0.423115	-0.373542	32.4403	0.782094	-0.106741	31.5673	0.395358	-0.40301	32.4403	1.35908	0.133245
Sample	Sample Osteogenic	Human	Human Osteogenic	H2	H2 Osteogenic	H20157	H20157 Osteogenic	H20157 Osteogenic - ACAN	Osteogenic	ACAN	3	H2O2	study-collection-qPCR-H2 - plate1	2020-07-28	Emilie Briscoe	34.832	1.81008	31.5673	0.18095	-0.742441	32.4403	1.23228	0.0907103	31.5673	0.128213	-0.892069	32.4403	0.236991	-0.625269	31.5673	0.15097	-0.821108	32.4403	0.518975	-0.284854
Sample	Sample iPSC	Human	Human iPSC	H3	H3 iPSC	H28126	H28126 iPSC	H28126 iPSC - ACAN	iPSC	ACAN	1	H3I2	study-collection-qPCR-H3 - plate1	2020-08-26	Emilie Briscoe	30.4654	1.93949	29.4412	0.775224	-0.110573	34.8219	28.2158	1.45049	29.4412	0.671579	-0.172903	34.8219	24.593	1.39081	29.4412	0.720471	-0.142384	34.8219	26.3058	1.42005
Sample	Sample iPSC	Human	Human iPSC	H3	H3 iPSC	H28126	H28126 iPSC	H28126 iPSC - ACAN	iPSC	ACAN	2	H3I2	study-collection-qPCR-H3 - plate1	2020-08-26	Emilie Briscoe	29.132	1.93949	29.4412	1.04353	0.0185065	34.8219	37.9815	1.57957	29.4412	1.12199	0.049988	34.8219	41.0868	1.6137	29.4412	1.08291	0.0345927	34.8219	39.5392	1.59703
Sample	Sample iPSC	Human	Human iPSC	H3	H3 iPSC	H28126	H28126 iPSC	H28126 iPSC - ACAN	iPSC	ACAN	3	H3I2	study-collection-qPCR-H3 - plate1	2020-08-26	Emilie Briscoe	28.7262	1.93949	29.4412	1.23614	0.0920661	34.8219	44.9916	1.65313	29.4412	1.32713	0.122915	34.8219	48.5992	1.68663	29.4412	1.28171	0.107791	34.8219	46.7979	1.67023
Sample	Sample MSC	Human	Human MSC	H3	H3 MSC	H28126	H28126 MSC	H28126 MSC - ACAN	MSC	ACAN	1	H3M1	study-collection-qPCR-H3 - plate1	2020-08-26	Emilie Briscoe	35.3123	1.93949	29.4412	0.0344001	-1.46344	34.8219	1.25206	0.0976249	29.4412	0.0327821	-1.48436	34.8219	1.20047	0.0793511	29.4412	0.0335754	-1.47398	34.8219	1.22591	0.0884571
Sample	Sample MSC	Human	Human MSC	H3	H3 MSC	H28126	H28126 MSC	H28126 MSC - ACAN	MSC	ACAN	2	H3M1	study-collection-qPCR-H3 - plate1	2020-08-26	Emilie Briscoe	34.3315	1.93949	29.4412	0.0336256	-1.47333	34.8219	1.22387	0.0877359	29.4412	0.0332449	-1.47827	34.8219	1.21742	0.0854396	29.4412	0.0334254	-1.47592	34.8219	1.22043	0.0865124
Sample	Sample MSC	Human	Human MSC	H3	H3 MSC	H28126	H28126 MSC	H28126 MSC - ACAN	MSC	ACAN	3	H3M1	study-collection-qPCR-H3 - plate1	2020-08-26	Emilie Briscoe	Undetermined	1.93949	29.4412			34.8219			29.4412			34.8219			29.4412			34.8219
Sample	Sample Adipogenic	Human	Human Adipogenic	H3	H3 Adipogenic	H28126	H28126 Adipogenic	H28126 Adipogenic - ACAN	Adipogenic	ACAN	1	H3A1	study-collection-qPCR-H3 - plate1	2020-08-26	Emilie Briscoe	35.5657	1.93949	29.4412	0.0608748	-1.21556	34.8219	2.21566	0.345503	29.4412	0.249926	-0.602188	34.8219	9.15222	0.961526	29.4412	0.125748	-0.9005	34.8219	4.5913	0.661935
Sample	Sample Adipogenic	Human	Human Adipogenic	H3	H3 Adipogenic	H28126	H28126 Adipogenic	H28126 Adipogenic - ACAN	Adipogenic	ACAN	2	H3A1	study-collection-qPCR-H3 - plate1	2020-08-26	Emilie Briscoe	Undetermined	1.93949	29.4412			34.8219			29.4412			34.8219			29.4412			34.8219
Sample	Sample Adipogenic	Human	Human Adipogenic	H3	H3 Adipogenic	H28126	H28126 Adipogenic	H28126 Adipogenic - ACAN	Adipogenic	ACAN	3	H3A1	study-collection-qPCR-H3 - plate1	2020-08-26	Emilie Briscoe	Undetermined	1.93949	29.4412			34.8219			29.4412			34.8219			29.4412			34.8219
Sample	Sample Osteogenic	Human	Human Osteogenic	H3	H3 Osteogenic	H28126	H28126 Osteogenic	H28126 Osteogenic - ACAN	Osteogenic	ACAN	1	H3O2	study-collection-qPCR-H3 - plate1	2020-08-26	Emilie Briscoe	31.2964	1.93949	29.4412	0.458211	-0.338934	34.8219	16.6775	1.22213	29.4412	0.80222	-0.0957066	34.8219	29.377	1.46801	29.4412	0.610916	-0.214018	34.8219	22.3058	1.34842
Sample	Sample Osteogenic	Human	Human Osteogenic	H3	H3 Osteogenic	H28126	H28126 Osteogenic	H28126 Osteogenic - ACAN	Osteogenic	ACAN	2	H3O2	study-collection-qPCR-H3 - plate1	2020-08-26	Emilie Briscoe	30.9544	1.93949	29.4412	0.290142	-0.537389	34.8219	10.5603	1.02368	29.4412	0.506621	-0.295316	34.8219	18.5523	1.2684	29.4412	0.386083	-0.41332	34.8219	14.0966	1.14912
Sample	Sample Osteogenic	Human	Human Osteogenic	H3	H3 Osteogenic	H28126	H28126 Osteogenic	H28126 Osteogenic - ACAN	Osteogenic	ACAN	3	H3O2	study-collection-qPCR-H3 - plate1	2020-08-26	Emilie Briscoe	29.9349	1.93949	29.4412	0.347296	-0.4593	34.8219	12.6405	1.10177	29.4412	0.874419	-0.0582804	34.8219	32.0209	1.50543	29.4412	0.557323	-0.253893	34.8219	20.349	1.30854
Sample	Sample iPSC	Human	Human iPSC	H4	H4 iPSC	H28834	H28834 iPSC	H28834 iPSC - ACAN	iPSC	ACAN	1	H4I2	study-collection-qPCR-H4 - plate1	2020-09-11	Emilie Briscoe	28.1632	1.87558	27.2386	0.956164	-0.0194676	25.3717	0.250236	-0.601651	27.2386	0.672539	-0.172282	25.3717	0.0574511	-1.2407	27.2386	0.796022	-0.0990752	25.3717	0.115577	-0.93713
Sample	Sample iPSC	Human	Human iPSC	H4	H4 iPSC	H28834	H28834 iPSC	H28834 iPSC - ACAN	iPSC	ACAN	2	H4I2	study-collection-qPCR-H4 - plate1	2020-09-11	Emilie Briscoe	27.0847	1.87558	27.2386	0.866744	-0.0621091	25.3717	0.226834	-0.644292	27.2386	1.11204	0.0461214	25.3717	0.0949954	-1.0223	27.2386	0.987337	-0.00553478	25.3717	0.143354	-0.843589
Sample	Sample iPSC	Human	Human iPSC	H4	H4 iPSC	H28834	H28834 iPSC	H28834 iPSC - ACAN	iPSC	ACAN	3	H4I2	study-collection-qPCR-H4 - plate1	2020-09-11	Emilie Briscoe	26.4677	1.87558	27.2386	1.20664	0.0815767	25.3717	0.315786	-0.500607	27.2386	1.33709	0.126161	25.3717	0.11422	-0.942258	27.2386	1.27236	0.10461	25.3717	0.184738	-0.733445
Sample	Sample MSC	Human	Human MSC	H4	H4 MSC	H28834	H28834 MSC	H28834 MSC - ACAN	MSC	ACAN	1	H4M2	study-collection-qPCR-H4 - plate1	2020-09-11	Emilie Briscoe	25.3903	1.87558	27.2386	4.18781	0.621987	25.3717	1.09598	0.0398038	27.2386	16.007	1.20431	25.3717	1.36739	0.135892	27.2386	8.48242	0.92852	25.3717	1.23159	0.090465
Sample	Sample MSC	Human	Human MSC	H4	H4 MSC	H28834	H28834 MSC	H28834 MSC - ACAN	MSC	ACAN	2	H4M2	study-collection-qPCR-H4 - plate1	2020-09-11	Emilie Briscoe	25.4824	1.87558	27.2386	3.65395	0.562763	25.3717	0.956269	-0.0194201	27.2386	13.3784	1.1264	25.3717	1.14284	0.0579839	27.2386	7.23377	0.859365	25.3717	1.05029	0.02131
Sample	Sample MSC	Human	Human MSC	H4	H4 MSC	H28834	H28834 MSC	H28834 MSC - ACAN	MSC	ACAN	3	H4M2	study-collection-qPCR-H4 - plate1	2020-09-11	Emilie Briscoe	25.2424	1.87558	27.2386	3.64586	0.5618	25.3717	0.954149	-0.0203836	27.2386	7.49105	0.874543	25.3717	0.639917	-0.193876	27.2386	5.32451	0.72628	25.3717	0.773081	-0.111775
Sample	Sample Adipogenic	Human	Human Adipogenic	H4	H4 Adipogenic	H28834	H28834 Adipogenic	H28834 Adipogenic - ACAN	Adipogenic	ACAN	1	H4A2	study-collection-qPCR-H4 - plate1	2020-09-11	Emilie Briscoe	30.5142	1.87558	27.2386	0.521073	-0.283101	25.3717	0.136369	-0.865285	27.2386	0.634409	-0.197631	25.3717	0.0541939	-1.26605	27.2386	0.580453	-0.236233	25.3717	0.0842777	-1.07429
Sample	Sample Adipogenic	Human	Human Adipogenic	H4	H4 Adipogenic	H28834	H28834 Adipogenic	H28834 Adipogenic - ACAN	Adipogenic	ACAN	2	H4A2	study-collection-qPCR-H4 - plate1	2020-09-11	Emilie Briscoe	30.5052	1.87558	27.2386	0.279729	-0.553262	25.3717	0.0732074	-1.13545	27.2386	0.503225	-0.298238	25.3717	0.0429876	-1.36666	27.2386	0.381848	-0.41811	25.3717	0.0554416	-1.25616
Sample	Sample Adipogenic	Human	Human Adipogenic	H4	H4 Adipogenic	H28834	H28834 Adipogenic	H28834 Adipogenic - ACAN	Adipogenic	ACAN	3	H4A2	study-collection-qPCR-H4 - plate1	2020-09-11	Emilie Briscoe	29.6937	1.87558	27.2386	0.384801	-0.414764	25.3717	0.100705	-0.996947	27.2386	0.690368	-0.160919	25.3717	0.0589741	-1.22934	27.2386	0.52421	-0.280495	25.3717	0.0761116	-1.11855
Sample	Sample Chondrogenic	Human	Human Chondrogenic	H4	H4 Chondrogenic	H28834	H28834 Chondrogenic	H28834 Chondrogenic - ACAN	Chondrogenic	ACAN	1	H4C2	study-collection-qPCR-H4 - plate1	2020-09-11	Emilie Briscoe	32.1663	1.87558	27.2386	0.304894	-0.515852	25.3717	0.0797931	-1.09803	27.2386	0.519044	-0.284796	25.3717	0.0443389	-1.35321	27.2386	0.405742	-0.39175	25.3717	0.0589109	-1.2298
Sample	Sample Chondrogenic	Human	Human Chondrogenic	H4	H4 Chondrogenic	H28834	H28834 Chondrogenic	H28834 Chondrogenic - ACAN	Chondrogenic	ACAN	2	H4C2	study-collection-qPCR-H4 - plate1	2020-09-11	Emilie Briscoe	32.5411	1.87558	27.2386	0.159745	-0.796572	25.3717	0.0418065	-1.37876	27.2386	0.233703	-0.631335	25.3717	0.0199639	-1.69975	27.2386	0.196047	-0.707639	25.3717	0.0284647	-1.54569
Sample	Sample Chondrogenic	Human	Human Chondrogenic	H4	H4 Chondrogenic	H28834	H28834 Chondrogenic	H28834 Chondrogenic - ACAN	Chondrogenic	ACAN	3	H4C2	study-collection-qPCR-H4 - plate1	2020-09-11	Emilie Briscoe	32.8714	1.87558	27.2386	0.120855	-0.917735	25.3717	0.0316287	-1.49992	27.2386	0.147755	-0.830457	25.3717	0.0126219	-1.89888	27.2386	0.134931	-0.869887	25.3717	0.0195911	-1.70794
Sample	Sample Osteogenic	Human	Human Osteogenic	H4	H4 Osteogenic	H28834	H28834 Osteogenic	H28834 Osteogenic - ACAN	Osteogenic	ACAN	1	H4O2	study-collection-qPCR-H4 - plate1	2020-09-11	Emilie Briscoe	28.6283	1.87558	27.2386	2.67939	0.428036	25.3717	0.701217	-0.154147	27.2386	1.38525	0.141529	25.3717	0.118334	-0.92689	27.2386	1.90526	0.279953	25.3717	0.276629	-0.558102
Sample	Sample Osteogenic	Human	Human Osteogenic	H4	H4 Osteogenic	H28834	H28834 Osteogenic	H28834 Osteogenic - ACAN	Osteogenic	ACAN	2	H4O2	study-collection-qPCR-H4 - plate1	2020-09-11	Emilie Briscoe	27.9229	1.87558	27.2386	2.7161	0.433946	25.3717	0.710826	-0.148237	27.2386	2.03676	0.308941	25.3717	0.173989	-0.759478	27.2386	2.34522	0.370185	25.3717	0.34051	-0.46787
Sample	Sample Osteogenic	Human	Human Osteogenic	H4	H4 Osteogenic	H28834	H28834 Osteogenic	H28834 Osteogenic - ACAN	Osteogenic	ACAN	3	H4O2	study-collection-qPCR-H4 - plate1	2020-09-11	Emilie Briscoe	27.4515	1.87558	27.2386	2.89612	0.461816	25.3717	0.757936	-0.120367	27.2386	2.02791	0.307048	25.3717	0.173232	-0.761371	27.2386	2.41039	0.382088	25.3717	0.349972	-0.455967
Sample	Sample iPSC	Human	Human iPSC	H5	H5 iPSC	H21792	H21792 iPSC	H21792 iPSC - ACAN	iPSC	ACAN	1	H5I2	study-collection-qPCR-H5 - plate1	2020-09-25	Emilie Briscoe	37.7789	1.90293	33.9641	0.206119	-0.685881	34.8794	0.39145	-0.407324	33.9641	0.134663	-0.870751	34.8794	0.123308	-0.909008	33.9641	0.167224	-0.776702	34.8794	0.221813	-0.654013
Sample	Sample iPSC	Human	Human iPSC	H5	H5 iPSC	H21792	H21792 iPSC	H21792 iPSC - ACAN	iPSC	ACAN	2	H5I2	study-collection-qPCR-H5 - plate1	2020-09-25	Emilie Briscoe	32.0578	1.90293	33.9641	2.15377	0.333199	34.8794	4.09032	0.611757	33.9641	3.30407	0.519049	34.8794	3.02547	0.480792	33.9641	2.65808	0.424567	34.8794	3.52579	0.547257
Sample	Sample iPSC	Human	Human iPSC	H5	H5 iPSC	H21792	H21792 iPSC	H21792 iPSC - ACAN	iPSC	ACAN	3	H5I2	study-collection-qPCR-H5 - plate1	2020-09-25	Emilie Briscoe	32.0558	1.90293	33.9641	2.25259	0.352682	34.8794	4.27799	0.63124	33.9641	2.24751	0.351702	34.8794	2.058	0.313445	33.9641	2.24975	0.352135	34.8794	2.98417	0.474824
Sample	Sample MSC	Human	Human MSC	H5	H5 MSC	H21792	H21792 MSC	H21792 MSC - ACAN	MSC	ACAN	1	H5M2	study-collection-qPCR-H5 - plate1	2020-09-25	Emilie Briscoe	34.434	1.90293	33.9641	0.741473	-0.129905	34.8794	1.40816	0.148653	33.9641	2.92442	0.46604	34.8794	2.67783	0.427783	33.9641	1.45649	0.163308	34.8794	1.93196	0.285997
Sample	Sample MSC	Human	Human MSC	H5	H5 MSC	H21792	H21792 MSC	H21792 MSC - ACAN	MSC	ACAN	2	H5M2	study-collection-qPCR-H5 - plate1	2020-09-25	Emilie Briscoe	35.3248	1.90293	33.9641	0.256268	-0.591306	34.8794	0.486689	-0.312748	33.9641	0.593652	-0.226468	34.8794	0.543595	-0.264725	33.9641	0.387367	-0.411878	34.8794	0.513821	-0.289188
Sample	Sample MSC	Human	Human MSC	H5	H5 MSC	H21792	H21792 MSC	H21792 MSC - ACAN	MSC	ACAN	3	H5M2	study-collection-qPCR-H5 - plate1	2020-09-25	Emilie Briscoe	Undetermined	1.90293	33.9641			34.8794			33.9641			34.8794			33.9641			34.8794
Sample	Sample Osteogenic	Human	Human Osteogenic	H5	H5 Osteogenic	H21792	H21792 Osteogenic	H21792 Osteogenic - ACAN	Osteogenic	ACAN	1	H5O2	study-collection-qPCR-H5 - plate1	2020-09-25	Emilie Briscoe	36.2082	1.90293	33.9641	1.53714	0.186715	34.8794	2.91926	0.465273	33.9641	1.31015	0.117323	34.8794	1.19968	0.0790659	33.9641	1.4219	0.152868	34.8794	1.88607	0.275557
Sample	Sample Osteogenic	Human	Human Osteogenic	H5	H5 Osteogenic	H21792	H21792 Osteogenic	H21792 Osteogenic - ACAN	Osteogenic	ACAN	2	H5O2	study-collection-qPCR-H5 - plate1	2020-09-25	Emilie Briscoe	35.4882	1.90293	33.9641	1.32177	0.121157	34.8794	2.51024	0.399714	33.9641	1.67204	0.223247	34.8794	1.53105	0.18499	33.9641	1.48451	0.171584	34.8794	1.96913	0.294274
Sample	Sample Osteogenic	Human	Human Osteogenic	H5	H5 Osteogenic	H21792	H21792 Osteogenic	H21792 Osteogenic - ACAN	Osteogenic	ACAN	3	H5O2	study-collection-qPCR-H5 - plate1	2020-09-25	Emilie Briscoe	Undetermined	1.90293	33.9641			34.8794			33.9641			34.8794			33.9641			34.8794
Sample	Sample iPSC	Human	Human iPSC	H6	H6 iPSC	H20961	H20961 iPSC	H20961 iPSC - ACAN	iPSC	ACAN	1	H6I2	study-collection-qPCR-H6 - plate1	2020-10-09	Emilie Briscoe	28.6565	1.84894	28.1351	1.27614	0.105899	31.4219	15.7069	1.19609	28.1351	1.29531	0.112375	31.4219	2.24408	0.351038	28.1351	1.29018	0.110649	31.4219	5.58908	0.74734
Sample	Sample iPSC	Human	Human iPSC	H6	H6 iPSC	H20961	H20961 iPSC	H20961 iPSC - ACAN	iPSC	ACAN	2	H6I2	study-collection-qPCR-H6 - plate1	2020-10-09	Emilie Briscoe	27.3676	1.84894	28.1351	1.31491	0.118896	31.4219	16.1841	1.20909	28.1351	1.40343	0.147191	31.4219	2.43139	0.385854	28.1351	1.36003	0.133549	31.4219	5.8917	0.770241
Sample	Sample iPSC	Human	Human iPSC	H6	H6 iPSC	H20961	H20961 iPSC	H20961 iPSC - ACAN	iPSC	ACAN	3	H6I2	study-collection-qPCR-H6 - plate1	2020-10-09	Emilie Briscoe	28.381	1.84894	28.1351	0.595943	-0.224795	31.4219	7.33495	0.865397	28.1351	0.550091	-0.259566	31.4219	0.953011	-0.0209021	28.1351	0.569904	-0.244198	31.4219	2.46884	0.392494
Sample	Sample MSC	Human	Human MSC	H6	H6 MSC	H20961	H20961 MSC	H20961 MSC - ACAN	MSC	ACAN	1	H6M2	study-collection-qPCR-H6 - plate1	2020-10-09	Emilie Briscoe	32.387	1.84894	28.1351	0.0433254	-1.36326	31.4219	0.533254	-0.273066	28.1351	0.442537	-0.354051	31.4219	0.766677	-0.115387	28.1351	0.149398	-0.825656	31.4219	0.647196	-0.188964
Sample	Sample MSC	Human	Human MSC	H6	H6 MSC	H20961	H20961 MSC	H20961 MSC - ACAN	MSC	ACAN	2	H6M2	study-collection-qPCR-H6 - plate1	2020-10-09	Emilie Briscoe	31.0386	1.84894	28.1351	0.101771	-0.992374	31.4219	1.25262	0.0978182	28.1351	0.651671	-0.185972	31.4219	1.12899	0.0526919	28.1351	0.273533	-0.56299	31.4219	1.18496	0.073702
Sample	Sample MSC	Human	Human MSC	H6	H6 MSC	H20961	H20961 MSC	H20961 MSC - ACAN	MSC	ACAN	3	H6M2	study-collection-qPCR-H6 - plate1	2020-10-09	Emilie Briscoe	30.8401	1.84894	28.1351	0.121634	-0.914945	31.4219	1.49709	0.175247	28.1351	0.666856	-0.175968	31.4219	1.1553	0.0626954	28.1351	0.301003	-0.52143	31.4219	1.30395	0.115262
Sample	Sample Adipogenic	Human	Human Adipogenic	H6	H6 Adipogenic	H20961	H20961 Adipogenic	H20961 Adipogenic - ACAN	Adipogenic	ACAN	1	H6A1	study-collection-qPCR-H6 - plate1	2020-10-09	Emilie Briscoe	31.8546	1.84894	28.1351	0.21397	-0.669647	31.4219	2.63357	0.420546	28.1351	1.10233	0.0423126	31.4219	1.90975	0.280976	28.1351	0.515425	-0.287834	31.4219	2.23284	0.348857
Sample	Sample Adipogenic	Human	Human Adipogenic	H6	H6 Adipogenic	H20961	H20961 Adipogenic	H20961 Adipogenic - ACAN	Adipogenic	ACAN	2	H6A1	study-collection-qPCR-H6 - plate1	2020-10-09	Emilie Briscoe	32.054	1.84894	28.1351	0.0642973	-1.19181	31.4219	0.79138	-0.101615	28.1351	0.346413	-0.460406	31.4219	0.600147	-0.221743	28.1351	0.157729	-0.802088	31.4219	0.683288	-0.165396
Sample	Sample Adipogenic	Human	Human Adipogenic	H6	H6 Adipogenic	H20961	H20961 Adipogenic	H20961 Adipogenic - ACAN	Adipogenic	ACAN	3	H6A1	study-collection-qPCR-H6 - plate1	2020-10-09	Emilie Briscoe	31.2885	1.84894	28.1351	0.169302	-0.771338	31.4219	2.08379	0.318854	28.1351	0.607407	-0.21652	31.4219	1.05231	0.0221431	28.1351	0.335154	-0.474755	31.4219	1.4519	0.161936
Sample	Sample Chondrogenic	Human	Human Chondrogenic	H6	H6 Chondrogenic	H20961	H20961 Chondrogenic	H20961 Chondrogenic - ACAN	Chondrogenic	ACAN	1	H6C1	study-collection-qPCR-H6 - plate1	2020-10-09	Emilie Briscoe	33.8986	1.84894	28.1351	0.384042	-0.415621	31.4219	4.72684	0.674571	28.1351	0.617459	-0.209392	31.4219	1.06972	0.0292716	28.1351	0.501652	-0.299597	31.4219	2.17317	0.337095
Sample	Sample Chondrogenic	Human	Human Chondrogenic	H6	H6 Chondrogenic	H20961	H20961 Chondrogenic	H20961 Chondrogenic - ACAN	Chondrogenic	ACAN	2	H6C1	study-collection-qPCR-H6 - plate1	2020-10-09	Emilie Briscoe	31.9296	1.84894	28.1351	0.212501	-0.672639	31.4219	2.61549	0.417553	28.1351	0.266373	-0.574509	31.4219	0.461482	-0.335846	28.1351	0.240738	-0.618454	31.4219	1.04289	0.0182372
Sample	Sample Chondrogenic	Human	Human Chondrogenic	H6	H6 Chondrogenic	H20961	H20961 Chondrogenic	H20961 Chondrogenic - ACAN	Chondrogenic	ACAN	3	H6C1	study-collection-qPCR-H6 - plate1	2020-10-09	Emilie Briscoe	31.9722	1.84894	28.1351	0.124158	-0.906025	31.4219	1.52815	0.184167	28.1351	0.316526	-0.499591	31.4219	0.548369	-0.260927	28.1351	0.204922	-0.688411	31.4219	0.88773	-0.0517191
Sample	Sample Osteogenic	Human	Human Osteogenic	H6	H6 Osteogenic	H20961	H20961 Osteogenic	H20961 Osteogenic - ACAN	Osteogenic	ACAN	1	H6O3	study-collection-qPCR-H6 - plate1	2020-10-09	Emilie Briscoe	35.3535	1.84894	28.1351	0.0351896	-1.45359	31.4219	0.433119	-0.363393	28.1351	0.0483267	-1.31581	31.4219	0.0837242	-1.07715	28.1351	0.0419242	-1.37753	31.4219	0.181617	-0.740843
Sample	Sample Osteogenic	Human	Human Osteogenic	H6	H6 Osteogenic	H20961	H20961 Osteogenic	H20961 Osteogenic - ACAN	Osteogenic	ACAN	2	H6O3	study-collection-qPCR-H6 - plate1	2020-10-09	Emilie Briscoe	Undetermined	1.84894	28.1351			31.4219			28.1351			31.4219			28.1351			31.4219
Sample	Sample Osteogenic	Human	Human Osteogenic	H6	H6 Osteogenic	H20961	H20961 Osteogenic	H20961 Osteogenic - ACAN	Osteogenic	ACAN	3	H6O3	study-collection-qPCR-H6 - plate1	2020-10-09	Emilie Briscoe	Undetermined	1.84894	28.1351			31.4219			28.1351			31.4219			28.1351			31.4219
Sample	Sample C8861 iPSC	Chimpanzee	Chimpanzee C8861 iPSC	C1	C1 C8861 iPSC	C8861	C8861 iPSC	C8861 iPSC - ACAN	C8861 iPSC	ACAN	1	C1I2	study-collection-qPCR-C1	2020-06-30	Emilie Briscoe	30.6501	1.86444							30.229	0.869469	-0.0607459	21.6927	0.00176133	-2.75416
Sample	Sample C8861 iPSC	Chimpanzee	Chimpanzee C8861 iPSC	C1	C1 C8861 iPSC	C8861	C8861 iPSC	C8861 iPSC - ACAN	C8861 iPSC	ACAN	2	C1I2	study-collection-qPCR-C1	2020-06-30	Emilie Briscoe	30.761	1.86444							30.229	0.986924	-0.00571631	21.6927	0.00199927	-2.69913
Sample	Sample C8861 iPSC	Chimpanzee	Chimpanzee C8861 iPSC	C1	C1 C8861 iPSC	C8861	C8861 iPSC	C8861 iPSC - ACAN	C8861 iPSC	ACAN	3	C1I2	study-collection-qPCR-C1	2020-06-30	Emilie Briscoe	29.2759	1.86444							30.229	1.16537	0.0664622	21.6927	0.00236075	-2.62695
Sample	Sample C8861 MSC	Chimpanzee	Chimpanzee C8861 MSC	C1	C1 C8861 MSC	C8861	C8861 MSC	C8861 MSC - ACAN	C8861 MSC	ACAN	1	C1M2	study-collection-qPCR-C1	2020-06-30	Emilie Briscoe	21.9582	1.86444							30.229	743.877	2.8715	21.6927	1.50691	0.178089
Sample	Sample C8861 MSC	Chimpanzee	Chimpanzee C8861 MSC	C1	C1 C8861 MSC	C8861	C8861 MSC	C8861 MSC - ACAN	C8861 MSC	ACAN	2	C1M2	study-collection-qPCR-C1	2020-06-30	Emilie Briscoe	21.478	1.86444							30.229	412.428	2.61535	21.6927	0.835479	-0.0780646
Sample	Sample C8861 MSC	Chimpanzee	Chimpanzee C8861 MSC	C1	C1 C8861 MSC	C8861	C8861 MSC	C8861 MSC - ACAN	C8861 MSC	ACAN	3	C1M2	study-collection-qPCR-C1	2020-06-30	Emilie Briscoe	21.642	1.86444							30.229	392.092	2.59339	21.6927	0.794284	-0.100024
Sample	Sample C8861 Adipogenic	Chimpanzee	Chimpanzee C8861 Adipogenic	C1	C1 C8861 Adipogenic	C8861	C8861 Adipogenic	C8861 Adipogenic - ACAN	C8861 Adipogenic	ACAN	1	C1A1	study-collection-qPCR-C1	2020-06-30	Emilie Briscoe	24.9686	1.86444							30.229	113.807	2.05617	21.6927	0.230545	-0.637245
Sample	Sample C8861 Adipogenic	Chimpanzee	Chimpanzee C8861 Adipogenic	C1	C1 C8861 Adipogenic	C8861	C8861 Adipogenic	C8861 Adipogenic - ACAN	C8861 Adipogenic	ACAN	2	C1A1	study-collection-qPCR-C1	2020-06-30	Emilie Briscoe	24.6834	1.86444							30.229	70.3048	1.84699	21.6927	0.142421	-0.846427
Sample	Sample C8861 Adipogenic	Chimpanzee	Chimpanzee C8861 Adipogenic	C1	C1 C8861 Adipogenic	C8861	C8861 Adipogenic	C8861 Adipogenic - ACAN	C8861 Adipogenic	ACAN	3	C1A1	study-collection-qPCR-C1	2020-06-30	Emilie Briscoe	23.981	1.86444							30.229	74.5009	1.87216	21.6927	0.150921	-0.821251
Sample	Sample C8861 Chondrogenic	Chimpanzee	Chimpanzee C8861 Chondrogenic	C1	C1 C8861 Chondrogenic	C8861	C8861 Chondrogenic	C8861 Chondrogenic - ACAN	C8861 Chondrogenic	ACAN	1	C1C2	study-collection-qPCR-C1	2020-06-30	Emilie Briscoe	26.5003	1.86444							30.229	23.5496	1.37198	21.6927	0.0477057	-1.32143
Sample	Sample C8861 Chondrogenic	Chimpanzee	Chimpanzee C8861 Chondrogenic	C1	C1 C8861 Chondrogenic	C8861	C8861 Chondrogenic	C8861 Chondrogenic - ACAN	C8861 Chondrogenic	ACAN	2	C1C2	study-collection-qPCR-C1	2020-06-30	Emilie Briscoe	26.3195	1.86444							30.229	32.4875	1.51172	21.6927	0.0658118	-1.1817
Sample	Sample C8861 Chondrogenic	Chimpanzee	Chimpanzee C8861 Chondrogenic	C1	C1 C8861 Chondrogenic	C8861	C8861 Chondrogenic	C8861 Chondrogenic - ACAN	C8861 Chondrogenic	ACAN	3	C1C2	study-collection-qPCR-C1	2020-06-30	Emilie Briscoe	26.3344	1.86444							30.229	25.6255	1.40867	21.6927	0.0519111	-1.28474
Sample	Sample iPSC	Chimpanzee	Chimpanzee iPSC	C1-r2	C1-r2 iPSC	C8861	C8861 (rep2) iPSC	C8861 (rep2) iPSC - ACAN	iPSC	ACAN	1	C1Ir2	study-collection-qPCR-C1r - plate1	2020-10-30	Emilie Briscoe	32.8619	1.89449	31.9599	1.1979	0.078421	34.498	14.5536	1.16297	31.9599	1.30552	0.115784	34.498	4.13241	0.616204	31.9599	1.25168	0.0974949	34.498	8.05805	0.90623
Sample	Sample iPSC	Chimpanzee	Chimpanzee iPSC	C1-r2	C1-r2 iPSC	C8861	C8861 (rep2) iPSC	C8861 (rep2) iPSC - ACAN	iPSC	ACAN	2	C1Ir2	study-collection-qPCR-C1r - plate1	2020-10-30	Emilie Briscoe	30.9549	1.89449	31.9599	1.32882	0.123467	34.498	16.1442	1.20802	31.9599	0.974362	-0.0112796	34.498	3.08418	0.489139	31.9599	1.14513	0.0588567	34.498	7.37211	0.867592
Sample	Sample iPSC	Chimpanzee	Chimpanzee iPSC	C1-r2	C1-r2 iPSC	C8861	C8861 (rep2) iPSC	C8861 (rep2) iPSC - ACAN	iPSC	ACAN	3	C1Ir2	study-collection-qPCR-C1r - plate1	2020-10-30	Emilie Briscoe	32.0628	1.89449	31.9599	0.62822	-0.201888	34.498	7.63241	0.882662	31.9599	0.786131	-0.104505	34.498	2.48837	0.395914	31.9599	0.697667	-0.156352	34.498	4.49142	0.652383
Sample	Sample MSC	Chimpanzee	Chimpanzee MSC	C1-r2	C1-r2 MSC	C8861	C8861 (rep2) MSC	C8861 (rep2) MSC - ACAN	MSC	ACAN	1	C1Mr1	study-collection-qPCR-C1r - plate1	2020-10-30	Emilie Briscoe	34.0004	1.89449	31.9599	0.135621	-0.867673	34.498	1.6477	0.216878	31.9599	0.888547	-0.0513194	34.498	2.81255	0.4491	31.9599	0.330161	-0.481274	34.498	2.1255	0.327461
Sample	Sample MSC	Chimpanzee	Chimpanzee MSC	C1-r2	C1-r2 MSC	C8861	C8861 (rep2) MSC	C8861 (rep2) MSC - ACAN	MSC	ACAN	2	C1Mr1	study-collection-qPCR-C1r - plate1	2020-10-30	Emilie Briscoe	34.9956	1.89449	31.9599	0.0536317	-1.27058	34.498	0.651586	-0.186028	31.9599	0.14372	-0.842481	34.498	0.454923	-0.342062	31.9599	0.085301	-1.06905	34.498	0.549148	-0.260311
Sample	Sample MSC	Chimpanzee	Chimpanzee MSC	C1-r2	C1-r2 MSC	C8861	C8861 (rep2) MSC	C8861 (rep2) MSC - ACAN	MSC	ACAN	3	C1Mr1	study-collection-qPCR-C1r - plate1	2020-10-30	Emilie Briscoe	Undetermined	1.89449	31.9599			34.498			31.9599			34.498			31.9599			34.498
Sample	Sample Adipogenic	Chimpanzee	Chimpanzee Adipogenic	C1-r2	C1-r2 Adipogenic	C8861	C8861 (rep2) Adipogenic	C8861 (rep2) Adipogenic - ACAN	Adipogenic	ACAN	1	C1Ar2	study-collection-qPCR-C1r - plate1	2020-10-30	Emilie Briscoe	37.562	1.89449	31.9599	0.124152	-0.906046	34.498	1.50836	0.178504	31.9599	0.0222306	-1.65305	34.498	0.0703672	-1.15263	31.9599	0.055194	-1.25811	34.498	0.355326	-0.449373
Sample	Sample Adipogenic	Chimpanzee	Chimpanzee Adipogenic	C1-r2	C1-r2 Adipogenic	C8861	C8861 (rep2) Adipogenic	C8861 (rep2) Adipogenic - ACAN	Adipogenic	ACAN	2	C1Ar2	study-collection-qPCR-C1r - plate1	2020-10-30	Emilie Briscoe	35.6076	1.89449	31.9599	0.177433	-0.750966	34.498	2.15568	0.333585	31.9599	0.0379109	-1.42124	34.498	0.120001	-0.920817	31.9599	0.0854744	-1.06816	34.498	0.550264	-0.259429
Sample	Sample Adipogenic	Chimpanzee	Chimpanzee Adipogenic	C1-r2	C1-r2 Adipogenic	C8861	C8861 (rep2) Adipogenic	C8861 (rep2) Adipogenic - ACAN	Adipogenic	ACAN	3	C1Ar2	study-collection-qPCR-C1r - plate1	2020-10-30	Emilie Briscoe	Undetermined	1.89449	31.9599			34.498			31.9599			34.498			31.9599			34.498
Sample	Sample Chondrogenic	Chimpanzee	Chimpanzee Chondrogenic	C1-r2	C1-r2 Chondrogenic	C8861	C8861 (rep2) Chondrogenic	C8861 (rep2) Chondrogenic - ACAN	Chondrogenic	ACAN	1	C1Cr2	study-collection-qPCR-C1r - plate1	2020-10-30	Emilie Briscoe	34.2058	1.89449	31.9599	0.55992	-0.251874	34.498	6.80262	0.832676	31.9599	1.5418	0.188027	34.498	4.8803	0.688446	31.9599	0.908878	-0.0414942	34.498	5.85114	0.767241
Sample	Sample Chondrogenic	Chimpanzee	Chimpanzee Chondrogenic	C1-r2	C1-r2 Chondrogenic	C8861	C8861 (rep2) Chondrogenic	C8861 (rep2) Chondrogenic - ACAN	Chondrogenic	ACAN	2	C1Cr2	study-collection-qPCR-C1r - plate1	2020-10-30	Emilie Briscoe	37.0747	1.89449	31.9599	0.0352752	-1.45253	34.498	0.428568	-0.36798	31.9599	0.0229189	-1.63981	34.498	0.0725459	-1.13939	31.9599	0.0287351	-1.54159	34.498	0.18499	-0.732852
Sample	Sample Chondrogenic	Chimpanzee	Chimpanzee Chondrogenic	C1-r2	C1-r2 Chondrogenic	C8861	C8861 (rep2) Chondrogenic	C8861 (rep2) Chondrogenic - ACAN	Chondrogenic	ACAN	3	C1Cr2	study-collection-qPCR-C1r - plate1	2020-10-30	Emilie Briscoe	Undetermined	1.89449	31.9599			34.498			31.9599			34.498			31.9599			34.498
Sample	Sample Osteogenic	Chimpanzee	Chimpanzee Osteogenic	C1-r2	C1-r2 Osteogenic	C8861	C8861 (rep2) Osteogenic	C8861 (rep2) Osteogenic - ACAN	Osteogenic	ACAN	1	C1Or2	study-collection-qPCR-C1r - plate1	2020-10-30	Emilie Briscoe	Undetermined	1.89449	31.9599			34.498			31.9599			34.498			31.9599			34.498
Sample	Sample Osteogenic	Chimpanzee	Chimpanzee Osteogenic	C1-r2	C1-r2 Osteogenic	C8861	C8861 (rep2) Osteogenic	C8861 (rep2) Osteogenic - ACAN	Osteogenic	ACAN	2	C1Or2	study-collection-qPCR-C1r - plate1	2020-10-30	Emilie Briscoe	Undetermined	1.89449	31.9599			34.498			31.9599			34.498			31.9599			34.498
Sample	Sample Osteogenic	Chimpanzee	Chimpanzee Osteogenic	C1-r2	C1-r2 Osteogenic	C8861	C8861 (rep2) Osteogenic	C8861 (rep2) Osteogenic - ACAN	Osteogenic	ACAN	3	C1Or2	study-collection-qPCR-C1r - plate1	2020-10-30	Emilie Briscoe	Undetermined	1.89449	31.9599			34.498			31.9599			34.498			31.9599			34.498
Sample	Sample iPSC	Chimpanzee	Chimpanzee iPSC	C2	C2 iPSC	C3647	C3647 iPSC	C3647 iPSC - ACAN	iPSC	ACAN	1	C2I2	study-collection-qPCR-C2 - plate1	2020-08-12	Emilie Briscoe	28.833	1.80178	28.2444	2.03393	0.308337	32.7942	9.89982	0.995627	28.2444	0.949281	-0.0226051	32.7942	12.87	1.10958	28.2444	1.36275	0.134415	32.7942	11.3807	1.05617
Sample	Sample iPSC	Chimpanzee	Chimpanzee iPSC	C2	C2 iPSC	C3647	C3647 iPSC	C3647 iPSC - ACAN	iPSC	ACAN	2	C2I2	study-collection-qPCR-C2 - plate1	2020-08-12	Emilie Briscoe	27.9439	1.80178	28.2444	0.665791	-0.176662	32.7942	3.24062	0.510629	28.2444	0.950217	-0.0221774	32.7942	12.8827	1.11001	28.2444	0.802309	-0.0956581	32.7942	6.70035	0.826097
Sample	Sample iPSC	Chimpanzee	Chimpanzee iPSC	C2	C2 iPSC	C3647	C3647 iPSC	C3647 iPSC - ACAN	iPSC	ACAN	3	C2I2	study-collection-qPCR-C2 - plate1	2020-08-12	Emilie Briscoe	27.9563	1.80178	28.2444	0.738457	-0.131675	32.7942	3.59431	0.555615	28.2444	1.10862	0.0447825	32.7942	15.0303	1.17697	28.2444	0.914626	-0.0387566	32.7942	7.63834	0.882999
Sample	Sample MSC	Chimpanzee	Chimpanzee MSC	C2	C2 MSC	C3647	C3647 MSC	C3647 MSC - ACAN	MSC	ACAN	1	C2M2	study-collection-qPCR-C2 - plate1	2020-08-12	Emilie Briscoe	32.7942	1.80178	28.2444	0.347824	-0.458641	32.7942	1.69297	0.22865	28.2444	0.105366	-0.977299	32.7942	1.42852	0.154885	28.2444	0.18566	-0.731282	32.7942	1.55051	0.190474
Sample	Sample MSC	Chimpanzee	Chimpanzee MSC	C2	C2 MSC	C3647	C3647 MSC	C3647 MSC - ACAN	MSC	ACAN	2	C2M2	study-collection-qPCR-C2 - plate1	2020-08-12	Emilie Briscoe	Undetermined	1.80178	28.2444			32.7942			28.2444			32.7942			28.2444			32.7942
Sample	Sample MSC	Chimpanzee	Chimpanzee MSC	C2	C2 MSC	C3647	C3647 MSC	C3647 MSC - ACAN	MSC	ACAN	3	C2M2	study-collection-qPCR-C2 - plate1	2020-08-12	Emilie Briscoe	Undetermined	1.80178	28.2444			32.7942			28.2444			32.7942			28.2444			32.7942
Sample	Sample Adipogenic	Chimpanzee	Chimpanzee Adipogenic	C2	C2 Adipogenic	C3647	C3647 Adipogenic	C3647 Adipogenic - ACAN	Adipogenic	ACAN	1	C2A2	study-collection-qPCR-C2 - plate1	2020-08-12	Emilie Briscoe	34.8622	1.80178	28.2444	0.116338	-0.934279	32.7942	0.566254	-0.246989	28.2444	0.0130978	-1.8828	32.7942	0.177575	-0.750617	28.2444	0.0366975	-1.43536	32.7942	0.306473	-0.513608
Sample	Sample Adipogenic	Chimpanzee	Chimpanzee Adipogenic	C2	C2 Adipogenic	C3647	C3647 Adipogenic	C3647 Adipogenic - ACAN	Adipogenic	ACAN	2	C2A2	study-collection-qPCR-C2 - plate1	2020-08-12	Emilie Briscoe	35.5237	1.80178	28.2444	0.0549595	-1.25996	32.7942	0.267506	-0.572667	28.2444	0.00815646	-2.0885	32.7942	0.110582	-0.956314	28.2444	0.0200474	-1.69794	32.7942	0.167423	-0.776186
Sample	Sample Adipogenic	Chimpanzee	Chimpanzee Adipogenic	C2	C2 Adipogenic	C3647	C3647 Adipogenic	C3647 Adipogenic - ACAN	Adipogenic	ACAN	3	C2A2	study-collection-qPCR-C2 - plate1	2020-08-12	Emilie Briscoe	35.3589	1.80178	28.2444	0.072446	-1.13999	32.7942	0.352618	-0.452695	28.2444	0.0100702	-1.99696	32.7942	0.136529	-0.864776	28.2444	0.0255427	-1.59273	32.7942	0.213315	-0.670978
Sample	Sample Chondrogenic	Chimpanzee	Chimpanzee Chondrogenic	C2	C2 Chondrogenic	C3647	C3647 Chondrogenic	C3647 Chondrogenic - ACAN	Chondrogenic	ACAN	1	C2C2	study-collection-qPCR-C2 - plate1	2020-08-12	Emilie Briscoe	Undetermined	1.80178	28.2444			32.7942			28.2444			32.7942			28.2444			32.7942
Sample	Sample Chondrogenic	Chimpanzee	Chimpanzee Chondrogenic	C2	C2 Chondrogenic	C3647	C3647 Chondrogenic	C3647 Chondrogenic - ACAN	Chondrogenic	ACAN	2	C2C2	study-collection-qPCR-C2 - plate1	2020-08-12	Emilie Briscoe	Undetermined	1.80178	28.2444			32.7942			28.2444			32.7942			28.2444			32.7942
Sample	Sample Chondrogenic	Chimpanzee	Chimpanzee Chondrogenic	C2	C2 Chondrogenic	C3647	C3647 Chondrogenic	C3647 Chondrogenic - ACAN	Chondrogenic	ACAN	3	C2C2	study-collection-qPCR-C2 - plate1	2020-08-12	Emilie Briscoe	Undetermined	1.80178	28.2444			32.7942			28.2444			32.7942			28.2444			32.7942
Sample	Sample Osteogenic	Chimpanzee	Chimpanzee Osteogenic	C2	C2 Osteogenic	C3647	C3647 Osteogenic	C3647 Osteogenic - ACAN	Osteogenic	ACAN	1	C2O1	study-collection-qPCR-C2 - plate1	2020-08-12	Emilie Briscoe	34.4944	1.80178	28.2444	0.350413	-0.45542	32.7942	1.70557	0.23187	28.2444	0.0337907	-1.4712	32.7942	0.458122	-0.339019	28.2444	0.102214	-0.990492	32.7942	0.853619	-0.068736
Sample	Sample Osteogenic	Chimpanzee	Chimpanzee Osteogenic	C2	C2 Osteogenic	C3647	C3647 Osteogenic	C3647 Osteogenic - ACAN	Osteogenic	ACAN	2	C2O1	study-collection-qPCR-C2 - plate1	2020-08-12	Emilie Briscoe	Undetermined	1.80178	28.2444			32.7942			28.2444			32.7942			28.2444			32.7942
Sample	Sample Osteogenic	Chimpanzee	Chimpanzee Osteogenic	C2	C2 Osteogenic	C3647	C3647 Osteogenic	C3647 Osteogenic - ACAN	Osteogenic	ACAN	3	C2O1	study-collection-qPCR-C2 - plate1	2020-08-12	Emilie Briscoe	Undetermined	1.80178	28.2444			32.7942			28.2444			32.7942			28.2444			32.7942
Sample	Sample iPSC	Chimpanzee	Chimpanzee iPSC	C3	C3 iPSC	C3649	C3649 iPSC	C3649 iPSC - ACAN	iPSC	ACAN	1	C3I2	study-collection-qPCR-C3 - plate1	2020-09-01	Emilie Briscoe	30.8698	1.99993	30.487	0.931126	-0.0309917	33.3037	3.07996	0.488545	30.487	0.921518	-0.035496	33.3037	2.32959	0.36728	30.487	0.926314	-0.033242	33.3037	2.66972	0.426466
Sample	Sample iPSC	Chimpanzee	Chimpanzee iPSC	C3	C3 iPSC	C3649	C3649 iPSC	C3649 iPSC - ACAN	iPSC	ACAN	2	C3I2	study-collection-qPCR-C3 - plate1	2020-09-01	Emilie Briscoe	30.3874	1.99993	30.487	1.20649	0.0815239	33.3037	3.9908	0.60106	30.487	0.983323	-0.0073038	33.3037	2.48584	0.395472	30.487	1.0869	0.0361877	33.3037	3.13253	0.495896
Sample	Sample iPSC	Chimpanzee	Chimpanzee iPSC	C3	C3 iPSC	C3649	C3649 iPSC	C3649 iPSC - ACAN	iPSC	ACAN	3	C3I2	study-collection-qPCR-C3 - plate1	2020-09-01	Emilie Briscoe	30.2039	1.99993	30.487	0.890159	-0.0505322	33.3037	2.94445	0.469004	30.487	1.10357	0.0427998	33.3037	2.78982	0.445576	30.487	0.99324	-0.00294572	33.3037	2.86261	0.456762
Sample	Sample MSC	Chimpanzee	Chimpanzee MSC	C3	C3 MSC	C3649	C3649 MSC	C3649 MSC - ACAN	MSC	ACAN	1	C3M2	study-collection-qPCR-C3 - plate1	2020-09-01	Emilie Briscoe	34.7319	1.99993	30.487	0.189284	-0.722885	33.3037	0.626111	-0.203348	30.487	0.156192	-0.806342	33.3037	0.394852	-0.403566	30.487	0.17172	-0.765178	33.3037	0.494914	-0.30547
Sample	Sample MSC	Chimpanzee	Chimpanzee MSC	C3	C3 MSC	C3649	C3649 MSC	C3649 MSC - ACAN	MSC	ACAN	2	C3M2	study-collection-qPCR-C3 - plate1	2020-09-01	Emilie Briscoe	32.5222	1.99993	30.487	0.481622	-0.317294	33.3037	1.5931	0.202243	30.487	0.672564	-0.172267	33.3037	1.70024	0.23051	30.487	0.571415	-0.243048	33.3037	1.64687	0.21666
Sample	Sample MSC	Chimpanzee	Chimpanzee MSC	C3	C3 MSC	C3649	C3649 MSC	C3649 MSC - ACAN	MSC	ACAN	3	C3M2	study-collection-qPCR-C3 - plate1	2020-09-01	Emilie Briscoe	32.6569	1.99993	30.487	0.303088	-0.518431	33.3037	1.00255	0.00110596	30.487	0.589223	-0.22972	33.3037	1.48955	0.173056	30.487	0.425699	-0.370898	33.3037	1.2269	0.0888105
Sample	Sample Adipogenic	Chimpanzee	Chimpanzee Adipogenic	C3	C3 Adipogenic	C3649	C3649 Adipogenic	C3649 Adipogenic - ACAN	Adipogenic	ACAN	1	C3A2	study-collection-qPCR-C3 - plate1	2020-09-01	Emilie Briscoe	32.6547	1.99993	30.487	0.257323	-0.589521	33.3037	0.851169	-0.0699841	30.487	0.192779	-0.71494	33.3037	0.487345	-0.312164	30.487	0.222055	-0.653539	33.3037	0.639985	-0.19383
Sample	Sample Adipogenic	Chimpanzee	Chimpanzee Adipogenic	C3	C3 Adipogenic	C3649	C3649 Adipogenic	C3649 Adipogenic - ACAN	Adipogenic	ACAN	2	C3A2	study-collection-qPCR-C3 - plate1	2020-09-01	Emilie Briscoe	29.8552	1.99993	30.487	1.2346	0.0915263	33.3037	4.08378	0.611063	30.487	0.66694	-0.175913	33.3037	1.68602	0.226863	30.487	0.901319	-0.0451214	33.3037	2.59769	0.414587
Sample	Sample Adipogenic	Chimpanzee	Chimpanzee Adipogenic	C3	C3 Adipogenic	C3649	C3649 Adipogenic	C3649 Adipogenic - ACAN	Adipogenic	ACAN	3	C3A2	study-collection-qPCR-C3 - plate1	2020-09-01	Emilie Briscoe	29.9474	1.99993	30.487	1.83851	0.264467	33.3037	6.0814	0.784003	30.487	0.661981	-0.179155	33.3037	1.67348	0.223622	30.487	1.09133	0.0379572	33.3037	3.14532	0.497665
Sample	Sample Chondrogenic	Chimpanzee	Chimpanzee Chondrogenic	C3	C3 Chondrogenic	C3649	C3649 Chondrogenic	C3649 Chondrogenic - ACAN	Chondrogenic	ACAN	1	C3C2	study-collection-qPCR-C3 - plate1	2020-09-01	Emilie Briscoe	34.7517	1.99993	30.487	0.201973	-0.694708	33.3037	0.66808	-0.175171	30.487	0.0293469	-1.53244	33.3037	0.0741887	-1.12966	30.487	0.0754727	-1.12221	33.3037	0.217519	-0.662502
Sample	Sample Chondrogenic	Chimpanzee	Chimpanzee Chondrogenic	C3	C3 Chondrogenic	C3649	C3649 Chondrogenic	C3649 Chondrogenic - ACAN	Chondrogenic	ACAN	2	C3C2	study-collection-qPCR-C3 - plate1	2020-09-01	Emilie Briscoe	32.3048	1.99993	30.487	0.908722	-0.041569	33.3037	3.00585	0.477968	30.487	0.0945379	-1.02439	33.3037	0.238991	-0.621618	30.487	0.286269	-0.543225	33.3037	0.825055	-0.083517
Sample	Sample Chondrogenic	Chimpanzee	Chimpanzee Chondrogenic	C3	C3 Chondrogenic	C3649	C3649 Chondrogenic	C3649 Chondrogenic - ACAN	Chondrogenic	ACAN	3	C3C2	study-collection-qPCR-C3 - plate1	2020-09-01	Emilie Briscoe	33.7691	1.99993	30.487	0.30396	-0.517184	33.3037	1.00543	0.00235265	30.487	0.0385409	-1.41408	33.3037	0.0974313	-1.0113	30.487	0.105932	-0.974973	33.3037	0.305306	-0.515265
Sample	Sample Osteogenic	Chimpanzee	Chimpanzee Osteogenic	C3	C3 Osteogenic	C3649	C3649 Osteogenic	C3649 Osteogenic - ACAN	Osteogenic	ACAN	1	C3O2	study-collection-qPCR-C3 - plate1	2020-09-01	Emilie Briscoe	34.1456	1.99993	30.487	0.54599	-0.262815	33.3037	1.80602	0.256721	30.487	0.124031	-0.906468	33.3037	0.313551	-0.503692	30.487	0.25642	-0.591048	33.3037	0.739026	-0.13134
Sample	Sample Osteogenic	Chimpanzee	Chimpanzee Osteogenic	C3	C3 Osteogenic	C3649	C3649 Osteogenic	C3649 Osteogenic - ACAN	Osteogenic	ACAN	2	C3O2	study-collection-qPCR-C3 - plate1	2020-09-01	Emilie Briscoe	34.0353	1.99993	30.487	0.317194	-0.498675	33.3037	1.04921	0.0208614	30.487	0.0811707	-1.0906	33.3037	0.205199	-0.687825	30.487	0.158252	-0.80065	33.3037	0.456098	-0.340941
Sample	Sample Osteogenic	Chimpanzee	Chimpanzee Osteogenic	C3	C3 Osteogenic	C3649	C3649 Osteogenic	C3649 Osteogenic - ACAN	Osteogenic	ACAN	3	C3O2	study-collection-qPCR-C3 - plate1	2020-09-01	Emilie Briscoe	34.0983	1.99993	30.487	0.382736	-0.417101	33.3037	1.26601	0.102436	30.487	0.11032	-0.957345	33.3037	0.278889	-0.554569	30.487	0.202946	-0.69262	33.3037	0.584909	-0.232912
Sample	Sample iPSC	Chimpanzee	Chimpanzee iPSC	C4	C4 iPSC	C40210	C40210 iPSC	C40210 iPSC - ACAN	iPSC	ACAN	1	C4I2	study-collection-qPCR-C4 - plate1	2020-09-17	Emilie Briscoe	33.3167	1.9193	32.8231	1.14074	0.0571852	31.379	1.96143	0.292572	32.8231	1.04062	0.0172903	31.379	0.538998	-0.268413	32.8231	1.0886	0.0368668	31.379	1.0112	0.00483677
Sample	Sample iPSC	Chimpanzee	Chimpanzee iPSC	C4	C4 iPSC	C40210	C40210 iPSC	C40210 iPSC - ACAN	iPSC	ACAN	2	C4I2	study-collection-qPCR-C4 - plate1	2020-09-17	Emilie Briscoe	31.8989	1.9193	32.8231	1.62026	0.209584	31.379	2.78594	0.444972	32.8231	1.70504	0.231734	31.379	0.883144	-0.0539685	32.8231	1.66313	0.220925	31.379	1.54488	0.188895
Sample	Sample iPSC	Chimpanzee	Chimpanzee iPSC	C4	C4 iPSC	C40210	C40210 iPSC	C40210 iPSC - ACAN	iPSC	ACAN	3	C4I2	study-collection-qPCR-C4 - plate1	2020-09-17	Emilie Briscoe	33.2539	1.9193	32.8231	0.541041	-0.266769	31.379	0.930289	-0.0313822	32.8231	0.563606	-0.249025	31.379	0.291926	-0.534727	32.8231	0.552342	-0.257792	31.379	0.513071	-0.289822
Sample	Sample MSC	Chimpanzee	Chimpanzee MSC	C4	C4 MSC	C40210	C40210 MSC	C40210 MSC - ACAN	MSC	ACAN	1	C4M2	study-collection-qPCR-C4 - plate1	2020-09-17	Emilie Briscoe	32.128	1.9193	32.8231	0.422759	-0.373908	31.379	0.726909	-0.13852	32.8231	1.62845	0.211775	31.379	0.843475	-0.0739279	32.8231	0.844927	-0.0731807	31.379	0.784855	-0.105211
Sample	Sample MSC	Chimpanzee	Chimpanzee MSC	C4	C4 MSC	C40210	C40210 MSC	C40210 MSC - ACAN	MSC	ACAN	2	C4M2	study-collection-qPCR-C4 - plate1	2020-09-17	Emilie Briscoe	31.0746	1.9193	32.8231	0.611365	-0.2137	31.379	1.05121	0.0216877	32.8231	1.94655	0.289265	31.379	1.00824	0.0035626	32.8231	1.10745	0.0443248	31.379	1.02871	0.0122947
Sample	Sample MSC	Chimpanzee	Chimpanzee MSC	C4	C4 MSC	C40210	C40210 MSC	C40210 MSC - ACAN	MSC	ACAN	3	C4M2	study-collection-qPCR-C4 - plate1	2020-09-17	Emilie Briscoe	30.9345	1.9193	32.8231	0.761106	-0.118555	31.379	1.30868	0.116832	32.8231	2.27022	0.356068	31.379	1.17589	0.0703653	32.8231	1.33336	0.124946	31.379	1.23856	0.0929161
Sample	Sample Adipogenic	Chimpanzee	Chimpanzee Adipogenic	C4	C4 Adipogenic	C40210	C40210 Adipogenic	C40210 Adipogenic - ACAN	Adipogenic	ACAN	1	C4A2	study-collection-qPCR-C4 - plate1	2020-09-17	Emilie Briscoe	35.5506	1.9193	32.8231	0.561096	-0.250963	31.379	0.964772	-0.0155754	32.8231	0.200101	-0.69875	31.379	0.103645	-0.984453	32.8231	0.330525	-0.480796	31.379	0.307025	-0.512826
Sample	Sample Adipogenic	Chimpanzee	Chimpanzee Adipogenic	C4	C4 Adipogenic	C40210	C40210 Adipogenic	C40210 Adipogenic - ACAN	Adipogenic	ACAN	2	C4A2	study-collection-qPCR-C4 - plate1	2020-09-17	Emilie Briscoe	Undetermined	1.9193	32.8231			31.379			32.8231			31.379			32.8231			31.379
Sample	Sample Adipogenic	Chimpanzee	Chimpanzee Adipogenic	C4	C4 Adipogenic	C40210	C40210 Adipogenic	C40210 Adipogenic - ACAN	Adipogenic	ACAN	3	C4A2	study-collection-qPCR-C4 - plate1	2020-09-17	Emilie Briscoe	Undetermined	1.9193	32.8231			31.379			32.8231			31.379			32.8231			31.379
Sample	Sample Chondrogenic	Chimpanzee	Chimpanzee Chondrogenic	C4	C4 Chondrogenic	C40210	C40210 Chondrogenic	C40210 Chondrogenic - ACAN	Chondrogenic	ACAN	1	C4C2	study-collection-qPCR-C4 - plate1	2020-09-17	Emilie Briscoe	35.5802	1.9193	32.8231	2.14136	0.330689	31.379	3.68194	0.566076	32.8231	0.360872	-0.442646	31.379	0.186918	-0.728349	32.8231	0.858985	-0.0660143	31.379	0.797913	-0.0980444
Sample	Sample Chondrogenic	Chimpanzee	Chimpanzee Chondrogenic	C4	C4 Chondrogenic	C40210	C40210 Chondrogenic	C40210 Chondrogenic - ACAN	Chondrogenic	ACAN	2	C4C2	study-collection-qPCR-C4 - plate1	2020-09-17	Emilie Briscoe	35.3346	1.9193	32.8231	1.2193	0.0861102	31.379	2.09651	0.321497	32.8231	0.317955	-0.497634	31.379	0.164688	-0.783337	32.8231	0.611813	-0.213381	31.379	0.568315	-0.245411
Sample	Sample Chondrogenic	Chimpanzee	Chimpanzee Chondrogenic	C4	C4 Chondrogenic	C40210	C40210 Chondrogenic	C40210 Chondrogenic - ACAN	Chondrogenic	ACAN	3	C4C2	study-collection-qPCR-C4 - plate1	2020-09-17	Emilie Briscoe	33.1036	1.9193	32.8231	5.41991	0.733992	31.379	9.31921	0.969379	32.8231	1.0269	0.0115286	31.379	0.531895	-0.274174	32.8231	2.30753	0.363148	31.379	2.14347	0.331118
Sample	Sample Osteogenic	Chimpanzee	Chimpanzee Osteogenic	C4	C4 Osteogenic	C40210	C40210 Osteogenic	C40210 Osteogenic - ACAN	Osteogenic	ACAN	1	C4O2	study-collection-qPCR-C4 - plate1	2020-09-17	Emilie Briscoe	35.4043	1.9193	32.8231	0.248567	-0.604557	31.379	0.427396	-0.36917	32.8231	0.557797	-0.253524	31.379	0.288917	-0.539227	32.8231	0.376859	-0.423822	31.379	0.350065	-0.455852
Sample	Sample Osteogenic	Chimpanzee	Chimpanzee Osteogenic	C4	C4 Osteogenic	C40210	C40210 Osteogenic	C40210 Osteogenic - ACAN	Osteogenic	ACAN	2	C4O2	study-collection-qPCR-C4 - plate1	2020-09-17	Emilie Briscoe	35.3102	1.9193	32.8231	0.261181	-0.583058	31.379	0.449086	-0.347671	32.8231	0.236297	-0.626542	31.379	0.122393	-0.912245	32.8231	0.24814	-0.605303	31.379	0.230498	-0.637333
Sample	Sample Osteogenic	Chimpanzee	Chimpanzee Osteogenic	C4	C4 Osteogenic	C40210	C40210 Osteogenic	C40210 Osteogenic - ACAN	Osteogenic	ACAN	3	C4O2	study-collection-qPCR-C4 - plate1	2020-09-17	Emilie Briscoe	Undetermined	1.9193	32.8231			31.379			32.8231			31.379			32.8231			31.379
Sample	Sample iPSC	Chimpanzee	Chimpanzee iPSC	C5	C5 iPSC	C40280	C40280 iPSC	C40280 iPSC - ACAN	iPSC	ACAN	1	C5I2	study-collection-qPCR-C5 - plate1	2020-09-30	Emilie Briscoe	32.2355	1.89231	31.4131	0.864239	-0.0633663	31.7027	0.261609	-0.582347	31.4131	0.739052	-0.131325	31.7027	0.584909	-0.232911	31.4131	0.796258	-0.0989462	31.7027	0.404877	-0.392677
Sample	Sample iPSC	Chimpanzee	Chimpanzee iPSC	C5	C5 iPSC	C40280	C40280 iPSC	C40280 iPSC - ACAN	iPSC	ACAN	2	C5I2	study-collection-qPCR-C5 - plate1	2020-09-30	Emilie Briscoe	30.7197	1.89231	31.4131	1.36672	0.13568	31.7027	0.413713	-0.383301	31.4131	1.07821	0.0327036	31.7027	0.85333	-0.0688827	31.4131	1.19334	0.076765	31.7027	0.606785	-0.216965
Sample	Sample iPSC	Chimpanzee	Chimpanzee iPSC	C5	C5 iPSC	C40280	C40280 iPSC	C40280 iPSC - ACAN	iPSC	ACAN	3	C5I2	study-collection-qPCR-C5 - plate1	2020-09-30	Emilie Briscoe	31.2841	1.89231	31.4131	0.846616	-0.0723136	31.7027	0.256275	-0.591294	31.4131	1.25494	0.0986215	31.7027	0.993196	-0.00296483	31.4131	1.0524	0.0221812	31.7027	0.535119	-0.271549
Sample	Sample MSC	Chimpanzee	Chimpanzee MSC	C5	C5 MSC	C40280	C40280 MSC	C40280 MSC - ACAN	MSC	ACAN	1	C5M2	study-collection-qPCR-C5 - plate1	2020-09-30	Emilie Briscoe	31.9454	1.89231	31.4131	2.96495	0.472017	31.7027	0.897505	-0.046963	31.4131	1.3889	0.142671	31.7027	1.09922	0.0410847	31.4131	1.98009	0.296684	31.7027	1.00682	0.00295366
Sample	Sample MSC	Chimpanzee	Chimpanzee MSC	C5	C5 MSC	C40280	C40280 MSC	C40280 MSC - ACAN	MSC	ACAN	2	C5M2	study-collection-qPCR-C5 - plate1	2020-09-30	Emilie Briscoe	31.5604	1.89231	31.4131	3.48759	0.542526	31.7027	1.05571	0.0235451	31.4131	1.0086	0.00371973	31.7027	0.79824	-0.0978666	31.4131	1.77273	0.248642	31.7027	0.901388	-0.0450882
Sample	Sample MSC	Chimpanzee	Chimpanzee MSC	C5	C5 MSC	C40280	C40280 MSC	C40280 MSC - ACAN	MSC	ACAN	3	C5M2	study-collection-qPCR-C5 - plate1	2020-09-30	Emilie Briscoe	31.6021	1.89231	31.4131	3.48657	0.542398	31.7027	1.0554	0.0234178	31.4131	1.44002	0.158368	31.7027	1.13968	0.0567819	31.4131	2.16703	0.335865	31.7027	1.10188	0.0421346
Sample	Sample Adipogenic	Chimpanzee	Chimpanzee Adipogenic	C5	C5 Adipogenic	C40280	C40280 Adipogenic	C40280 Adipogenic - ACAN	Adipogenic	ACAN	1	C5A2	study-collection-qPCR-C5 - plate1	2020-09-30	Emilie Briscoe	34.1504	1.89231	31.4131	3.46842	0.540132	31.7027	1.04991	0.0211515	31.4131	0.280597	-0.551917	31.7027	0.222074	-0.653503	31.4131	0.883875	-0.0536092	31.7027	0.449428	-0.34734
Sample	Sample Adipogenic	Chimpanzee	Chimpanzee Adipogenic	C5	C5 Adipogenic	C40280	C40280 Adipogenic	C40280 Adipogenic - ACAN	Adipogenic	ACAN	2	C5A2	study-collection-qPCR-C5 - plate1	2020-09-30	Emilie Briscoe	33.5252	1.89231	31.4131	1.14482	0.058739	31.7027	0.346544	-0.460241	31.4131	0.115708	-0.936637	31.7027	0.091575	-1.03822	31.4131	0.322644	-0.491276	31.7027	0.164057	-0.785006
Sample	Sample Adipogenic	Chimpanzee	Chimpanzee Adipogenic	C5	C5 Adipogenic	C40280	C40280 Adipogenic	C40280 Adipogenic - ACAN	Adipogenic	ACAN	3	C5A2	study-collection-qPCR-C5 - plate1	2020-09-30	Emilie Briscoe	33.4158	1.89231	31.4131	4.23846	0.627208	31.7027	1.283	0.108227	31.4131	0.167595	-0.77574	31.7027	0.13264	-0.877326	31.4131	0.718582	-0.143524	31.7027	0.365381	-0.437254
Sample	Sample Chondrogenic	Chimpanzee	Chimpanzee Chondrogenic	C5	C5 Chondrogenic	C40280	C40280 Chondrogenic	C40280 Chondrogenic - ACAN	Chondrogenic	ACAN	1	C5C2	study-collection-qPCR-C5 - plate1	2020-09-30	Emilie Briscoe	34.3551	1.89231	31.4131	4.03645	0.605999	31.7027	1.22185	0.0870187	31.4131	0.348006	-0.458413	31.7027	0.275423	-0.559999	31.4131	1.07109	0.0298278	31.7027	0.544625	-0.263903
Sample	Sample Chondrogenic	Chimpanzee	Chimpanzee Chondrogenic	C5	C5 Chondrogenic	C40280	C40280 Chondrogenic	C40280 Chondrogenic - ACAN	Chondrogenic	ACAN	2	C5C2	study-collection-qPCR-C5 - plate1	2020-09-30	Emilie Briscoe	35.8809	1.89231	31.4131	0.381021	-0.419051	31.7027	0.115337	-0.938031	31.4131	0.0475156	-1.32316	31.7027	0.0376053	-1.42475	31.4131	0.121672	-0.91481	31.7027	0.061867	-1.20854
Sample	Sample Chondrogenic	Chimpanzee	Chimpanzee Chondrogenic	C5	C5 Chondrogenic	C40280	C40280 Chondrogenic	C40280 Chondrogenic - ACAN	Chondrogenic	ACAN	3	C5C2	study-collection-qPCR-C5 - plate1	2020-09-30	Emilie Briscoe	34.7773	1.89231	31.4131	0.590119	-0.22906	31.7027	0.178632	-0.748041	31.4131	0.10079	-0.996582	31.7027	0.0797685	-1.09817	31.4131	0.22398	-0.649791	31.7027	0.113888	-0.943522
Sample	Sample Osteogenic	Chimpanzee	Chimpanzee Osteogenic	C5	C5 Osteogenic	C40280	C40280 Osteogenic	C40280 Osteogenic - ACAN	Osteogenic	ACAN	1	C5O2	study-collection-qPCR-C5 - plate1	2020-09-30	Emilie Briscoe	35.6532	1.89231	31.4131	6.09075	0.784671	31.7027	1.8437	0.265691	31.4131	0.668231	-0.175074	31.7027	0.528859	-0.27666	31.4131	1.8891	0.276255	31.7027	0.96056	-0.0174757
Sample	Sample Osteogenic	Chimpanzee	Chimpanzee Osteogenic	C5	C5 Osteogenic	C40280	C40280 Osteogenic	C40280 Osteogenic - ACAN	Osteogenic	ACAN	2	C5O2	study-collection-qPCR-C5 - plate1	2020-09-30	Emilie Briscoe	35.0471	1.89231	31.4131	6.67673	0.824564	31.7027	2.02108	0.305583	31.4131	0.834281	-0.0786878	31.7027	0.660276	-0.180274	31.4131	2.21752	0.345867	31.7027	1.12755	0.0521366
Sample	Sample Osteogenic	Chimpanzee	Chimpanzee Osteogenic	C5	C5 Osteogenic	C40280	C40280 Osteogenic	C40280 Osteogenic - ACAN	Osteogenic	ACAN	3	C5O2	study-collection-qPCR-C5 - plate1	2020-09-30	Emilie Briscoe	Undetermined	1.89231	31.4131			31.7027			31.4131			31.7027			31.4131			31.7027
Sample	Sample iPSC	Chimpanzee	Chimpanzee iPSC	C6	C6 iPSC	C3624	C3624 iPSC	C3624 iPSC - ACAN	iPSC	ACAN	1	C6I2	study-collection-qPCR-C6 - plate1	2020-10-16	Emilie Briscoe	32.1605	1.85407	30.8887	1.75156	0.243426	30.3445	0.376118	-0.424676	30.8887	0.660877	-0.179879	30.3445	0.292737	-0.533523	30.8887	1.06435	0.0270837	30.3445	0.330848	-0.480372
Sample	Sample iPSC	Chimpanzee	Chimpanzee iPSC	C6	C6 iPSC	C3624	C3624 iPSC	C3624 iPSC - ACAN	iPSC	ACAN	2	C6I2	study-collection-qPCR-C6 - plate1	2020-10-16	Emilie Briscoe	30.2867	1.85407	30.8887	0.880562	-0.0552399	30.3445	0.189085	-0.723342	30.8887	1.23269	0.0908554	30.3445	0.546024	-0.262788	30.8887	1.04572	0.0194151	30.3445	0.325057	-0.48804
Sample	Sample iPSC	Chimpanzee	Chimpanzee iPSC	C6	C6 iPSC	C3624	C3624 iPSC	C3624 iPSC - ACAN	iPSC	ACAN	3	C6I2	study-collection-qPCR-C6 - plate1	2020-10-16	Emilie Briscoe	30.219	1.85407	30.8887	0.648356	-0.188186	30.3445	0.139223	-0.856288	30.8887	1.22751	0.0890239	30.3445	0.543726	-0.26462	30.8887	0.898465	-0.0464987	30.3445	0.279284	-0.553954
Sample	Sample MSC	Chimpanzee	Chimpanzee MSC	C6	C6 MSC	C3624	C3624 MSC	C3624 MSC - ACAN	MSC	ACAN	1	C6M2	study-collection-qPCR-C6 - plate1	2020-10-16	Emilie Briscoe	31.1619	1.85407	30.8887	7.67254	0.884939	30.3445	1.64754	0.216837	30.8887	2.35463	0.371922	30.3445	1.04299	0.0182789	30.8887	4.19697	0.622936	30.3445	1.30461	0.11548
Sample	Sample MSC	Chimpanzee	Chimpanzee MSC	C6	C6 MSC	C3624	C3624 MSC	C3624 MSC - ACAN	MSC	ACAN	2	C6M2	study-collection-qPCR-C6 - plate1	2020-10-16	Emilie Briscoe	30.1999	1.85407	30.8887	3.41177	0.53298	30.3445	0.732619	-0.135122	30.8887	2.08213	0.318507	30.3445	0.922282	-0.0351361	30.8887	2.65098	0.423407	30.3445	0.824047	-0.0840483
Sample	Sample MSC	Chimpanzee	Chimpanzee MSC	C6	C6 MSC	C3624	C3624 MSC	C3624 MSC - ACAN	MSC	ACAN	3	C6M2	study-collection-qPCR-C6 - plate1	2020-10-16	Emilie Briscoe	29.6717	1.85407	30.8887	3.85822	0.586387	30.3445	0.828485	-0.0817154	30.8887	2.34693	0.370501	30.3445	1.03958	0.0168572	30.8887	2.99242	0.476023	30.3445	0.930182	-0.0314321
Sample	Sample Adipogenic	Chimpanzee	Chimpanzee Adipogenic	C6	C6 Adipogenic	C3624	C3624 Adipogenic	C3624 Adipogenic - ACAN	Adipogenic	ACAN	1	C6A1	study-collection-qPCR-C6 - plate1	2020-10-16	Emilie Briscoe	32.9289	1.85407	30.8887	0.411585	-0.38554	30.3445	0.0883807	-1.05364	30.8887	0.28644	-0.542966	30.3445	0.126879	-0.896609	30.8887	0.341948	-0.466039	30.3445	0.106293	-0.973495
Sample	Sample Adipogenic	Chimpanzee	Chimpanzee Adipogenic	C6	C6 Adipogenic	C3624	C3624 Adipogenic	C3624 Adipogenic - ACAN	Adipogenic	ACAN	2	C6A1	study-collection-qPCR-C6 - plate1	2020-10-16	Emilie Briscoe	32.0829	1.85407	30.8887	0.253488	-0.596042	30.3445	0.0544322	-1.26414	30.8887	0.210397	-0.67696	30.3445	0.0931958	-1.0306	30.8887	0.230308	-0.63769	30.3445	0.0715903	-1.14515
Sample	Sample Adipogenic	Chimpanzee	Chimpanzee Adipogenic	C6	C6 Adipogenic	C3624	C3624 Adipogenic	C3624 Adipogenic - ACAN	Adipogenic	ACAN	3	C6A1	study-collection-qPCR-C6 - plate1	2020-10-16	Emilie Briscoe	33.3925	1.85407	30.8887	0.0613336	-1.2123	30.3445	0.0131703	-1.8804	30.8887	0.103137	-0.986586	30.3445	0.0456847	-1.34023	30.8887	0.079962	-1.09712	30.3445	0.0248558	-1.60457
Sample	Sample Osteogenic	Chimpanzee	Chimpanzee Osteogenic	C6	C6 Osteogenic	C3624	C3624 Osteogenic	C3624 Osteogenic - ACAN	Osteogenic	ACAN	1	C6O2	study-collection-qPCR-C6 - plate1	2020-10-16	Emilie Briscoe	32.8743	1.85407	30.8887	4.14589	0.617618	30.3445	0.890258	-0.0504839	30.8887	5.08275	0.706099	30.3445	2.25141	0.352456	30.8887	4.61104	0.663799	30.3445	1.43332	0.156343
Sample	Sample Osteogenic	Chimpanzee	Chimpanzee Osteogenic	C6	C6 Osteogenic	C3624	C3624 Osteogenic	C3624 Osteogenic - ACAN	Osteogenic	ACAN	2	C6O2	study-collection-qPCR-C6 - plate1	2020-10-16	Emilie Briscoe	34.8706	1.85407	30.8887	0.253442	-0.596122	30.3445	0.0544222	-1.26422	30.8887	0.208119	-0.681688	30.3445	0.0921868	-1.03533	30.8887	0.229305	-0.639586	30.3445	0.0712785	-1.14704
Sample	Sample Osteogenic	Chimpanzee	Chimpanzee Osteogenic	C6	C6 Osteogenic	C3624	C3624 Osteogenic	C3624 Osteogenic - ACAN	Osteogenic	ACAN	3	C6O2	study-collection-qPCR-C6 - plate1	2020-10-16	Emilie Briscoe	32.3993	1.85407	30.8887	0.5646	-0.248259	30.3445	0.121238	-0.916361	30.8887	0.620321	-0.207383	30.3445	0.274772	-0.561027	30.8887	0.592642	-0.227208	30.3445	0.18422	-0.734663
Sample	Sample iPSC	Human	Human iPSC	H1	H1 iPSC	H23555	H23555 iPSC	H23555 iPSC - ALB	iPSC	ALB	1	H1I2	study-collection-qPCR-H1	2020-06-24	Emilie Briscoe	32.4866	1.97003							32.311	1.21711	0.0853307
Sample	Sample iPSC	Human	Human iPSC	H1	H1 iPSC	H23555	H23555 iPSC	H23555 iPSC - ALB	iPSC	ALB	2	H1I2	study-collection-qPCR-H1	2020-06-24	Emilie Briscoe	32.8063	1.97003							32.311	0.634082	-0.197855
Sample	Sample iPSC	Human	Human iPSC	H1	H1 iPSC	H23555	H23555 iPSC	H23555 iPSC - ALB	iPSC	ALB	3	H1I2	study-collection-qPCR-H1	2020-06-24	Emilie Briscoe	31.64	1.97003							32.311	1.29576	0.112524
Sample	Sample Adipogenic	Human	Human Adipogenic	H1	H1 Adipogenic	H23555	H23555 Adipogenic	H23555 Adipogenic - ALB	Adipogenic	ALB	1	H1A1	study-collection-qPCR-H1	2020-06-24	Emilie Briscoe	33.4029	1.97003							32.311	0.793887	-0.100242
Sample	Sample Adipogenic	Human	Human Adipogenic	H1	H1 Adipogenic	H23555	H23555 Adipogenic	H23555 Adipogenic - ALB	Adipogenic	ALB	2	H1A1	study-collection-qPCR-H1	2020-06-24	Emilie Briscoe	34.9274	1.97003							32.311	0.191394	-0.718072
Sample	Sample Chondrogenic	Human	Human Chondrogenic	H1	H1 Chondrogenic	H23555	H23555 Chondrogenic	H23555 Chondrogenic - ALB	Chondrogenic	ALB	1	H1C2	study-collection-qPCR-H1	2020-06-24	Emilie Briscoe	33.5975	1.97003							32.311	0.83316	-0.0792715
Sample	Sample Chondrogenic	Human	Human Chondrogenic	H1	H1 Chondrogenic	H23555	H23555 Chondrogenic	H23555 Chondrogenic - ALB	Chondrogenic	ALB	2	H1C2	study-collection-qPCR-H1	2020-06-24	Emilie Briscoe	35.8514	1.97003							32.311	0.111234	-0.953764
Sample	Sample Chondrogenic	Human	Human Chondrogenic	H1	H1 Chondrogenic	H23555	H23555 Chondrogenic	H23555 Chondrogenic - ALB	Chondrogenic	ALB	3	H1C2	study-collection-qPCR-H1	2020-06-24	Emilie Briscoe	35.7831	1.97003							32.311	0.080091	-1.09642
Sample	Sample iPSC	Human	Human iPSC	H1-r2	H1-r2 iPSC	H23555	H23555 iPSC	H23555 iPSC - ALB	iPSC	ALB		H1Ir2	study-collection-qPCR-H1r - plate1	2020-10-26	Emilie Briscoe	33.2147	1.88489	32.5661	1.02545	0.0109164	33.8724	2.85388	0.455435	32.5661	1.52753	0.183991	33.8724	3.08877	0.489786	32.5661	1.24553	0.0953528	33.8724	2.96781	0.472436
Sample	Sample iPSC	Human	Human iPSC	H1-r2	H1-r2 iPSC	H23555	H23555 iPSC	H23555 iPSC - ALB	iPSC	ALB		H1Ir2	study-collection-qPCR-H1r - plate1	2020-10-26	Emilie Briscoe	33.3838	1.88489	32.5661	0.588265	-0.230427	33.8724	1.63716	0.214092	32.5661	0.454922	-0.342063	33.8724	0.919881	-0.0362684	32.5661	0.519075	-0.28477	33.8724	1.23684	0.0923132
Sample	Sample iPSC	Human	Human iPSC	H1-r2	H1-r2 iPSC	H23555	H23555 iPSC	H23555 iPSC - ALB	iPSC	ALB		H1Ir2	study-collection-qPCR-H1r - plate1	2020-10-26	Emilie Briscoe	31.0998	1.88489	32.5661	1.65772	0.219511	33.8724	4.61349	0.66403	32.5661	1.43904	0.158072	33.8724	2.90982	0.463866	32.5661	1.54674	0.189417	33.8724	3.68553	0.5665
Sample	Sample MSC	Human	Human MSC	H1-r2	H1-r2 MSC	H23555	H23555 MSC	H23555 MSC - ALB	MSC	ALB		H1Mr2	study-collection-qPCR-H1r - plate1	2020-10-26	Emilie Briscoe	34.2033	1.88489	32.5661	0.558513	-0.252966	33.8724	1.55436	0.191553	32.5661	0.685183	-0.164193	33.8724	1.38548	0.141601	32.5661	0.617228	-0.209554	33.8724	1.47072	0.167529
Sample	Sample MSC	Human	Human MSC	H1-r2	H1-r2 MSC	H23555	H23555 MSC	H23555 MSC - ALB	MSC	ALB		H1Mr2	study-collection-qPCR-H1r - plate1	2020-10-26	Emilie Briscoe	33.92	1.88489	32.5661	0.228375	-0.641352	33.8724	0.635575	-0.196833	32.5661	0.335633	-0.474135	33.8724	0.678671	-0.168341	32.5661	0.275273	-0.560236	33.8724	0.655914	-0.183153
Sample	Sample MSC	Human	Human MSC	H1-r2	H1-r2 MSC	H23555	H23555 MSC	H23555 MSC - ALB	MSC	ALB		H1Mr2	study-collection-qPCR-H1r - plate1	2020-10-26	Emilie Briscoe	33.494	1.88489	32.5661	0.363715	-0.439239	33.8724	1.01223	0.00528036	32.5661	0.525951	-0.279054	33.8724	1.06351	0.02674	32.5661	0.435052	-0.361459	33.8724	1.03663	0.0156243
Sample	Sample Adipogenic	Human	Human Adipogenic	H1-r2	H1-r2 Adipogenic	H23555	H23555 Adipogenic	H23555 Adipogenic - ALB	Adipogenic	ALB		H1Ar2	study-collection-qPCR-H1r - plate1	2020-10-26	Emilie Briscoe	33.8348	1.88489	32.5661	0.396143	-0.402148	33.8724	1.10248	0.0423711	32.5661	1.38041	0.140009	33.8724	2.79128	0.445804	32.5661	0.727256	-0.138313	33.8724	1.73289	0.238771
Sample	Sample Adipogenic	Human	Human Adipogenic	H1-r2	H1-r2 Adipogenic	H23555	H23555 Adipogenic	H23555 Adipogenic - ALB	Adipogenic	ALB		H1Ar2	study-collection-qPCR-H1r - plate1	2020-10-26	Emilie Briscoe	31.9346	1.88489	32.5661	0.844385	-0.0734594	33.8724	2.34996	0.37106	32.5661	1.06957	0.0292088	33.8724	2.16273	0.335003	32.5661	0.946804	-0.02374	33.8724	2.25602	0.353343
Sample	Sample Adipogenic	Human	Human Adipogenic	H1-r2	H1-r2 Adipogenic	H23555	H23555 Adipogenic	H23555 Adipogenic - ALB	Adipogenic	ALB		H1Ar2	study-collection-qPCR-H1r - plate1	2020-10-26	Emilie Briscoe	32.4836	1.88489	32.5661	0.536424	-0.270492	33.8724	1.49289	0.174028	32.5661	1.59427	0.202562	33.8724	3.22371	0.508356	32.5661	0.910882	-0.0405379	33.8724	2.17043	0.336545
Sample	Sample Osteogenic	Human	Human Osteogenic	H1-r2	H1-r2 Osteogenic	H23555	H23555 Osteogenic	H23555 Osteogenic - ALB	Osteogenic	ALB		H1Or2	study-collection-qPCR-H1r - plate1	2020-10-26	Emilie Briscoe	35.9029	1.88489	32.5661	0.219244	-0.659072	33.8724	0.610164	-0.214553	32.5661			33.8724			32.5661	0.203104	-0.692282	33.8724	0.483951	-0.315198
Sample	Sample Osteogenic	Human	Human Osteogenic	H1-r2	H1-r2 Osteogenic	H23555	H23555 Osteogenic	H23555 Osteogenic - ALB	Osteogenic	ALB		H1Or2	study-collection-qPCR-H1r - plate1	2020-10-26	Emilie Briscoe	32.7221	1.88489	32.5661	0.974128	-0.0113838	33.8724	2.71104	0.433135	32.5661	0.762561	-0.117725	33.8724	1.54195	0.188069	32.5661	0.864745	-0.063112	33.8724	2.06049	0.313971
Sample	Sample Osteogenic	Human	Human Osteogenic	H1-r2	H1-r2 Osteogenic	H23555	H23555 Osteogenic	H23555 Osteogenic - ALB	Osteogenic	ALB		H1Or2	study-collection-qPCR-H1r - plate1	2020-10-26	Emilie Briscoe	32.4176	1.88489	32.5661	1.24128	0.0938712	33.8724	3.45454	0.53839	32.5661	1.25022	0.0969847	33.8724	2.52801	0.402779	32.5661	1.24578	0.095441	33.8724	2.96841	0.472524
Sample	Sample iPSC	Human	Human iPSC	H2	H2 iPSC	H20157	H20157 iPSC	H20157 iPSC - ALB	iPSC	ALB	1	H2I2	study-collection-qPCR-H2 - plate1	2020-07-28	Emilie Briscoe	34.7973	2.00957	33.3736	0.454834	-0.342147	35.8651	10.5001	1.0212	33.3736	0.458701	-0.33847	35.8651	2.87423	0.458521	33.3736	0.45722	-0.339875	35.8651	5.32808	0.726571
Sample	Sample iPSC	Human	Human iPSC	H2	H2 iPSC	H20157	H20157 iPSC	H20157 iPSC - ALB	iPSC	ALB	2	H2I2	study-collection-qPCR-H2 - plate1	2020-07-28	Emilie Briscoe	32.6152	2.00957	33.3736	1.38003	0.13989	35.8651	31.859	1.50323	33.3736	1.56446	0.194363	35.8651	9.80291	0.991355	33.3736	1.47343	0.16833	35.8651	17.1702	1.23478
Sample	Sample iPSC	Human	Human iPSC	H2	H2 iPSC	H20157	H20157 iPSC	H20157 iPSC - ALB	iPSC	ALB	3	H2I2	study-collection-qPCR-H2 - plate1	2020-07-28	Emilie Briscoe	32.7084	2.00957	33.3736	1.59315	0.202257	35.8651	36.779	1.5656	33.3736	1.3935	0.144107	35.8651	8.73169	0.941098	33.3736	1.48438	0.171545	35.8651	17.2978	1.23799
Sample	Sample MSC	Human	Human MSC	H2	H2 MSC	H20157	H20157 MSC	H20157 MSC - ALB	MSC	ALB	1	H2M2	study-collection-qPCR-H2 - plate1	2020-07-28	Emilie Briscoe	36.4149	2.00957	33.3736	0.0383054	-1.41674	35.8651	0.884306	-0.0533973	33.3736	0.160593	-0.794272	35.8651	1.00628	0.00271908	33.3736	0.0813233	-1.08978	35.8651	0.947678	-0.0233391
Sample	Sample MSC	Human	Human MSC	H2	H2 MSC	H20157	H20157 MSC	H20157 MSC - ALB	MSC	ALB	2	H2M2	study-collection-qPCR-H2 - plate1	2020-07-28	Emilie Briscoe	36.4167	2.00957	33.3736	0.0227622	-1.64279	35.8651	0.525481	-0.279443	33.3736	0.0707663	-1.15017	35.8651	0.443423	-0.353182	33.3736	0.0411859	-1.38525	35.8651	0.479948	-0.318805
Sample	Sample MSC	Human	Human MSC	H2	H2 MSC	H20157	H20157 MSC	H20157 MSC - ALB	MSC	ALB	3	H2M2	study-collection-qPCR-H2 - plate1	2020-07-28	Emilie Briscoe	34.7636	2.00957	33.3736	0.0932176	-1.0305	35.8651	2.15199	0.33284	33.3736	0.357661	-0.446529	35.8651	2.24111	0.350463	33.3736	0.188668	-0.724301	35.8651	2.19859	0.342145
Sample	Sample Adipogenic	Human	Human Adipogenic	H2	H2 Adipogenic	H20157	H20157 Adipogenic	H20157 Adipogenic - ALB	Adipogenic	ALB	1	H2A2	study-collection-qPCR-H2 - plate1	2020-07-28	Emilie Briscoe	34.8917	2.00957	33.3736	0.263904	-0.578554	35.8651	6.0924	0.784789	33.3736	0.645389	-0.190178	35.8651	4.04402	0.606813	33.3736	0.42281	-0.373855	35.8651	4.9271	0.692591
Sample	Sample Adipogenic	Human	Human Adipogenic	H2	H2 Adipogenic	H20157	H20157 Adipogenic	H20157 Adipogenic - ALB	Adipogenic	ALB	2	H2A2	study-collection-qPCR-H2 - plate1	2020-07-28	Emilie Briscoe	33.0277	2.00957	33.3736	0.908454	-0.0416971	35.8651	20.9723	1.32165	33.3736	2.47808	0.394115	35.8651	15.5277	1.19111	33.3736	1.54154	0.187954	35.8651	17.9639	1.2544
Sample	Sample Adipogenic	Human	Human Adipogenic	H2	H2 Adipogenic	H20157	H20157 Adipogenic	H20157 Adipogenic - ALB	Adipogenic	ALB	3	H2A2	study-collection-qPCR-H2 - plate1	2020-07-28	Emilie Briscoe	34.3425	2.00957	33.3736	0.430187	-0.366342	35.8651	9.93116	0.997	33.3736	0.821401	-0.0854449	35.8651	5.14691	0.711547	33.3736	0.605002	-0.218243	35.8651	7.05022	0.848203
Sample	Sample Chondrogenic	Human	Human Chondrogenic	H2	H2 Chondrogenic	H20157	H20157 Chondrogenic	H20157 Chondrogenic - ALB	Chondrogenic	ALB	1	H2C2	study-collection-qPCR-H2 - plate1	2020-07-28	Emilie Briscoe	36.44	2.00957	33.3736	1.76621	0.247042	35.8651	40.7741	1.61038	33.3736	5.52402	0.742255	35.8651	34.6136	1.53925	33.3736	3.258	0.512951	35.8651	37.9662	1.5794
Sample	Sample Chondrogenic	Human	Human Chondrogenic	H2	H2 Chondrogenic	H20157	H20157 Chondrogenic	H20157 Chondrogenic - ALB	Chondrogenic	ALB	2	H2C2	study-collection-qPCR-H2 - plate1	2020-07-28	Emilie Briscoe	35.4112	2.00957	33.3736	3.82963	0.583157	35.8651	88.4095	1.9465	33.3736	6.11004	0.786044	35.8651	38.2856	1.58304	33.3736	4.95167	0.694752	35.8651	57.7029	1.7612
Sample	Sample Chondrogenic	Human	Human Chondrogenic	H2	H2 Chondrogenic	H20157	H20157 Chondrogenic	H20157 Chondrogenic - ALB	Chondrogenic	ALB	3	H2C2	study-collection-qPCR-H2 - plate1	2020-07-28	Emilie Briscoe	35.4016	2.00957	33.3736	4.06081	0.608613	35.8651	93.7465	1.97196	33.3736	5.21907	0.717593	35.8651	32.7027	1.51458	33.3736	4.68479	0.67069	35.8651	54.5929	1.73714
Sample	Sample Osteogenic	Human	Human Osteogenic	H2	H2 Osteogenic	H20157	H20157 Osteogenic	H20157 Osteogenic - ALB	Osteogenic	ALB	1	H2O2	study-collection-qPCR-H2 - plate1	2020-07-28	Emilie Briscoe	32.9723	2.00957	33.3736	5.33523	0.727153	35.8651	123.167	2.0905	33.3736	4.01677	0.603877	35.8651	25.1692	1.40087	33.3736	4.61609	0.664275	35.8651	53.7923	1.73072
Sample	Sample Osteogenic	Human	Human Osteogenic	H2	H2 Osteogenic	H20157	H20157 Osteogenic	H20157 Osteogenic - ALB	Osteogenic	ALB	2	H2O2	study-collection-qPCR-H2 - plate1	2020-07-28	Emilie Briscoe	33.8069	2.00957	33.3736	0.677822	-0.168884	35.8651	15.648	1.19446	33.3736	0.782131	-0.106721	35.8651	4.90084	0.690271	33.3736	0.730822	-0.136189	35.8651	8.51642	0.930257
Sample	Sample Osteogenic	Human	Human Osteogenic	H2	H2 Osteogenic	H20157	H20157 Osteogenic	H20157 Osteogenic - ALB	Osteogenic	ALB	3	H2O2	study-collection-qPCR-H2 - plate1	2020-07-28	Emilie Briscoe	33.7658	2.00957	33.3736	0.955046	-0.0199757	35.8651	22.0479	1.34337	33.3736	0.6767	-0.169604	35.8651	4.24021	0.627388	33.3736	0.796814	-0.0986431	35.8651	9.28545	0.967803
Sample	Sample iPSC	Human	Human iPSC	H3	H3 iPSC	H28126	H28126 iPSC	H28126 iPSC - ALB	iPSC	ALB	1	H3I2	study-collection-qPCR-H3 - plate1	2020-08-26	Emilie Briscoe	31.8394	2.09984	31.2623	0.995766	-0.00184285	35.4097	22.2575	1.34748	31.2623	0.862635	-0.0641731	35.4097	19.3997	1.28779	31.2623	0.925436	-0.0336537	35.4097	20.7508	1.31704
Sample	Sample iPSC	Human	Human iPSC	H3	H3 iPSC	H28126	H28126 iPSC	H28126 iPSC - ALB	iPSC	ALB	2	H3I2	study-collection-qPCR-H3 - plate1	2020-08-26	Emilie Briscoe	30.9796	2.09984	31.2623	1.0487	0.0206496	35.4097	23.4406	1.36997	31.2623	1.12754	0.0521311	35.4097	25.3571	1.4041	31.2623	1.08827	0.0367358	35.4097	24.402	1.38742
Sample	Sample iPSC	Human	Human iPSC	H3	H3 iPSC	H28126	H28126 iPSC	H28126 iPSC - ALB	iPSC	ALB	3	H3I2	study-collection-qPCR-H3 - plate1	2020-08-26	Emilie Briscoe	30.968	2.09984	31.2623	0.95762	-0.0188068	35.4097	21.4049	1.33051	31.2623	1.02812	0.0120421	35.4097	23.1212	1.36401	31.2623	0.992928	-0.0030821	35.4097	22.2642	1.34761
Sample	Sample MSC	Human	Human MSC	H3	H3 MSC	H28126	H28126 MSC	H28126 MSC - ALB	MSC	ALB	1	H3M1	study-collection-qPCR-H3 - plate1	2020-08-26	Emilie Briscoe	34.6587	2.09984	31.2623	0.135307	-0.868681	35.4097	3.02439	0.480638	31.2623	0.128943	-0.889603	35.4097	2.89978	0.462365	31.2623	0.132063	-0.879218	35.4097	2.96122	0.47147
Sample	Sample MSC	Human	Human MSC	H3	H3 MSC	H28126	H28126 MSC	H28126 MSC - ALB	MSC	ALB	2	H3M1	study-collection-qPCR-H3 - plate1	2020-08-26	Emilie Briscoe	36.1606	2.09984	31.2623	0.0226675	-1.6446	35.4097	0.506667	-0.295278	31.2623	0.0224109	-1.64954	35.4097	0.503995	-0.297574	31.2623	0.0225325	-1.64719	35.4097	0.505242	-0.296501
Sample	Sample MSC	Human	Human MSC	H3	H3 MSC	H28126	H28126 MSC	H28126 MSC - ALB	MSC	ALB	3	H3M1	study-collection-qPCR-H3 - plate1	2020-08-26	Emilie Briscoe	Undetermined	2.09984	31.2623			35.4097			31.2623			35.4097			31.2623			35.4097
Sample	Sample Adipogenic	Human	Human Adipogenic	H3	H3 Adipogenic	H28126	H28126 Adipogenic	H28126 Adipogenic - ALB	Adipogenic	ALB	1	H3A1	study-collection-qPCR-H3 - plate1	2020-08-26	Emilie Briscoe	36.2525	2.09984	31.2623	0.0868192	-1.06138	35.4097	1.94059	0.287935	31.2623	0.356443	-0.44801	35.4097	8.01601	0.903958	31.2623	0.17934	-0.746322	35.4097	4.02131	0.604367
Sample	Sample Adipogenic	Human	Human Adipogenic	H3	H3 Adipogenic	H28126	H28126 Adipogenic	H28126 Adipogenic - ALB	Adipogenic	ALB	2	H3A1	study-collection-qPCR-H3 - plate1	2020-08-26	Emilie Briscoe	36.2337	2.09984	31.2623	0.0280046	-1.55277	35.4097	0.625962	-0.203452	31.2623	0.0954004	-1.02045	35.4097	2.14545	0.331518	31.2623	0.0525162	-1.27971	35.4097	1.17756	0.0709825
Sample	Sample Adipogenic	Human	Human Adipogenic	H3	H3 Adipogenic	H28126	H28126 Adipogenic	H28126 Adipogenic - ALB	Adipogenic	ALB	3	H3A1	study-collection-qPCR-H3 - plate1	2020-08-26	Emilie Briscoe	Undetermined	2.09984	31.2623			35.4097			31.2623			35.4097			31.2623			35.4097
Sample	Sample Osteogenic	Human	Human Osteogenic	H3	H3 Osteogenic	H28126	H28126 Osteogenic	H28126 Osteogenic - ALB	Osteogenic	ALB	1	H3O2	study-collection-qPCR-H3 - plate1	2020-08-26	Emilie Briscoe	34.6689	2.09984	31.2623	0.12509	-0.902777	35.4097	2.79603	0.446542	31.2623	0.219003	-0.659549	35.4097	4.92514	0.692419	31.2623	0.166778	-0.777861	35.4097	3.73963	0.572828
Sample	Sample Osteogenic	Human	Human Osteogenic	H3	H3 Osteogenic	H28126	H28126 Osteogenic	H28126 Osteogenic - ALB	Osteogenic	ALB	2	H3O2	study-collection-qPCR-H3 - plate1	2020-08-26	Emilie Briscoe	32.8344	2.09984	31.2623	0.246283	-0.608565	35.4097	5.50496	0.740754	31.2623	0.430039	-0.366493	35.4097	9.67109	0.985475	31.2623	0.327721	-0.484496	35.4097	7.3484	0.866193
Sample	Sample Osteogenic	Human	Human Osteogenic	H3	H3 Osteogenic	H28126	H28126 Osteogenic	H28126 Osteogenic - ALB	Osteogenic	ALB	3	H3O2	study-collection-qPCR-H3 - plate1	2020-08-26	Emilie Briscoe	32.4245	2.09984	31.2623	0.20337	-0.691712	35.4097	4.54577	0.657607	31.2623	0.512044	-0.290692	35.4097	11.5153	1.06128	31.2623	0.326359	-0.486305	35.4097	7.31786	0.864384
Sample	Sample iPSC	Human	Human iPSC	H4	H4 iPSC	H28834	H28834 iPSC	H28834 iPSC - ALB	iPSC	ALB	1	H4I2	study-collection-qPCR-H4 - plate1	2020-09-11	Emilie Briscoe	32.4849	2.12288	32.189	1.36893	0.136382	33.9513	4.36761	0.640243	32.189	0.962869	-0.0164326	33.9513	1.00275	0.00119304	32.189	1.13966	0.0567746	33.9513	2.01727	0.304765
Sample	Sample iPSC	Human	Human iPSC	H4	H4 iPSC	H28834	H28834 iPSC	H28834 iPSC - ALB	iPSC	ALB	2	H4I2	study-collection-qPCR-H4 - plate1	2020-09-11	Emilie Briscoe	32.388	2.12288	32.189	0.677383	-0.169166	33.9513	2.1612	0.334695	32.189	0.86909	-0.0609354	33.9513	0.905087	-0.0433097	32.189	0.771629	-0.112592	33.9513	1.36584	0.135398
Sample	Sample iPSC	Human	Human iPSC	H4	H4 iPSC	H28834	H28834 iPSC	H28834 iPSC - ALB	iPSC	ALB	3	H4I2	study-collection-qPCR-H4 - plate1	2020-09-11	Emilie Briscoe	31.6943	2.12288	32.189	1.07841	0.0327837	33.9513	3.44069	0.536645	32.189	1.195	0.077368	33.9513	1.2445	0.0949937	32.189	1.13715	0.055817	33.9513	2.01283	0.303807
Sample	Sample MSC	Human	Human MSC	H4	H4 MSC	H28834	H28834 MSC	H28834 MSC - ALB	MSC	ALB	1	H4M2	study-collection-qPCR-H4 - plate1	2020-09-11	Emilie Briscoe	33.8445	2.12288	32.189	0.376659	-0.424052	33.9513	1.20174	0.0798092	32.189	1.4397	0.158272	33.9513	1.49933	0.175898	32.189	0.762923	-0.11752	33.9513	1.35042	0.13047
Sample	Sample MSC	Human	Human MSC	H4	H4 MSC	H28834	H28834 MSC	H28834 MSC - ALB	MSC	ALB	2	H4M2	study-collection-qPCR-H4 - plate1	2020-09-11	Emilie Briscoe	34.6329	2.12288	32.189	0.19237	-0.715863	33.9513	0.61376	-0.212001	32.189	0.704332	-0.152223	33.9513	0.733505	-0.134597	32.189	0.380837	-0.419261	33.9513	0.674107	-0.171271
Sample	Sample MSC	Human	Human MSC	H4	H4 MSC	H28834	H28834 MSC	H28834 MSC - ALB	MSC	ALB	3	H4M2	study-collection-qPCR-H4 - plate1	2020-09-11	Emilie Briscoe	33.3766	2.12288	32.189	0.424943	-0.371669	33.9513	1.35579	0.132192	32.189	0.87312	-0.0589263	33.9513	0.909284	-0.0413006	32.189	0.620598	-0.207189	33.9513	1.0985	0.0408006
Sample	Sample Adipogenic	Human	Human Adipogenic	H4	H4 Adipogenic	H28834	H28834 Adipogenic	H28834 Adipogenic - ALB	Adipogenic	ALB	1	H4A2	study-collection-qPCR-H4 - plate1	2020-09-11	Emilie Briscoe	35.5672	2.12288	32.189	0.321493	-0.492829	33.9513	1.02573	0.0110324	32.189	0.391419	-0.407358	33.9513	0.407631	-0.389733	32.189	0.358129	-0.44596	33.9513	0.633913	-0.19797
Sample	Sample Adipogenic	Human	Human Adipogenic	H4	H4 Adipogenic	H28834	H28834 Adipogenic	H28834 Adipogenic - ALB	Adipogenic	ALB	2	H4A2	study-collection-qPCR-H4 - plate1	2020-09-11	Emilie Briscoe	33.7498	2.12288	32.189	0.674093	-0.17128	33.9513	2.15071	0.332581	32.189	1.21267	0.0837437	33.9513	1.2629	0.101369	32.189	0.920178	-0.0361283	33.9513	1.62878	0.211862
Sample	Sample Adipogenic	Human	Human Adipogenic	H4	H4 Adipogenic	H28834	H28834 Adipogenic	H28834 Adipogenic - ALB	Adipogenic	ALB	3	H4A2	study-collection-qPCR-H4 - plate1	2020-09-11	Emilie Briscoe	33.5115	2.12288	32.189	0.665985	-0.176536	33.9513	2.12484	0.327326	32.189	1.19484	0.0773084	33.9513	1.24433	0.0949341	32.189	0.907263	-0.0422667	33.9513	1.60592	0.205723
Sample	Sample Chondrogenic	Human	Human Chondrogenic	H4	H4 Chondrogenic	H28834	H28834 Chondrogenic	H28834 Chondrogenic - ALB	Chondrogenic	ALB	1	H4C2	study-collection-qPCR-H4 - plate1	2020-09-11	Emilie Briscoe	36.8397	2.12288	32.189	0.20402	-0.690327	33.9513	0.65093	-0.186465	32.189	0.347319	-0.459271	33.9513	0.361705	-0.441645	32.189	0.271503	-0.566225	33.9513	0.480579	-0.318235
Sample	Sample Chondrogenic	Human	Human Chondrogenic	H4	H4 Chondrogenic	H28834	H28834 Chondrogenic	H28834 Chondrogenic - ALB	Chondrogenic	ALB	2	H4C2	study-collection-qPCR-H4 - plate1	2020-09-11	Emilie Briscoe	36.4293	2.12288	32.189	0.18429	-0.734499	33.9513	0.58798	-0.230638	32.189	0.269611	-0.569262	33.9513	0.280779	-0.551636	32.189	0.22617	-0.645565	33.9513	0.400336	-0.397575
Sample	Sample Chondrogenic	Human	Human Chondrogenic	H4	H4 Chondrogenic	H28834	H28834 Chondrogenic	H28834 Chondrogenic - ALB	Chondrogenic	ALB	3	H4C2	study-collection-qPCR-H4 - plate1	2020-09-11	Emilie Briscoe	36.8706	2.12288	32.189	0.123102	-0.909736	33.9513	0.392759	-0.405874	32.189	0.150502	-0.822457	33.9513	0.156736	-0.804831	32.189	0.13744	-0.861887	33.9513	0.243278	-0.613897
Sample	Sample Osteogenic	Human	Human Osteogenic	H4	H4 Osteogenic	H28834	H28834 Osteogenic	H28834 Osteogenic - ALB	Osteogenic	ALB	1	H4O2	study-collection-qPCR-H4 - plate1	2020-09-11	Emilie Briscoe	34.6348	2.12288	32.189	1.01872	0.00805304	33.9513	3.25023	0.511914	32.189	0.526679	-0.278454	33.9513	0.548494	-0.260828	32.189	0.724386	-0.14003	33.9513	1.28221	0.10796
Sample	Sample Osteogenic	Human	Human Osteogenic	H4	H4 Osteogenic	H28834	H28834 Osteogenic	H28834 Osteogenic - ALB	Osteogenic	ALB	2	H4O2	study-collection-qPCR-H4 - plate1	2020-09-11	Emilie Briscoe	34.0864	2.12288	32.189	1.00131	0.000570056	33.9513	3.19471	0.504431	32.189	0.750869	-0.124436	33.9513	0.78197	-0.10681	32.189	0.864586	-0.0631918	33.9513	1.53038	0.184798
Sample	Sample Osteogenic	Human	Human Osteogenic	H4	H4 Osteogenic	H28834	H28834 Osteogenic	H28834 Osteogenic - ALB	Osteogenic	ALB	3	H4O2	study-collection-qPCR-H4 - plate1	2020-09-11	Emilie Briscoe	Undetermined	2.12288	32.189			33.9513			32.189			33.9513			32.189			33.9513
Sample	Sample iPSC	Human	Human iPSC	H5	H5 iPSC	H21792	H21792 iPSC	H21792 iPSC - ALB	iPSC	ALB	1	H5I2	study-collection-qPCR-H5 - plate1	2020-09-25	Emilie Briscoe	31.8926	1.97696	32.2844	3.13355	0.496036	33.2771	6.4965	0.81268	32.2844	2.04723	0.311167	33.2771	2.04642	0.310996	32.2844	2.54224	0.405216	33.2771	3.68121	0.565991
Sample	Sample iPSC	Human	Human iPSC	H5	H5 iPSC	H21792	H21792 iPSC	H21792 iPSC - ALB	iPSC	ALB	2	H5I2	study-collection-qPCR-H5 - plate1	2020-09-25	Emilie Briscoe	32.7309	1.97696	32.2844	0.465982	-0.331631	33.2771	0.966078	-0.0149878	32.2844	0.714856	-0.145781	33.2771	0.714575	-0.145952	32.2844	0.575092	-0.240263	33.2771	0.832745	-0.079488
Sample	Sample iPSC	Human	Human iPSC	H5	H5 iPSC	H21792	H21792 iPSC	H21792 iPSC - ALB	iPSC	ALB	3	H5I2	study-collection-qPCR-H5 - plate1	2020-09-25	Emilie Briscoe	32.2298	1.97696	32.2844	0.684849	-0.164405	33.2771	1.41984	0.152238	32.2844	0.683305	-0.165385	33.2771	0.683036	-0.165557	32.2844	0.683986	-0.164953	33.2771	0.990426	-0.00417806
Sample	Sample MSC	Human	Human MSC	H5	H5 MSC	H21792	H21792 MSC	H21792 MSC - ALB	MSC	ALB	1	H5M2	study-collection-qPCR-H5 - plate1	2020-09-25	Emilie Briscoe	33.9507	1.97696	32.2844	0.322222	-0.491845	33.2771	0.668034	-0.175202	32.2844	1.27087	0.104099	33.2771	1.27036	0.103928	32.2844	0.632948	-0.198632	33.2771	0.916521	-0.0378574
Sample	Sample MSC	Human	Human MSC	H5	H5 MSC	H21792	H21792 MSC	H21792 MSC - ALB	MSC	ALB	2	H5M2	study-collection-qPCR-H5 - plate1	2020-09-25	Emilie Briscoe	33.1092	1.97696	32.2844	0.350567	-0.455229	33.2771	0.726799	-0.138586	32.2844	0.812099	-0.090391	33.2771	0.811779	-0.0905621	32.2844	0.529907	-0.275801	33.2771	0.767316	-0.115026
Sample	Sample MSC	Human	Human MSC	H5	H5 MSC	H21792	H21792 MSC	H21792 MSC - ALB	MSC	ALB	3	H5M2	study-collection-qPCR-H5 - plate1	2020-09-25	Emilie Briscoe	32.7714	1.97696	32.2844	0.993445	-0.00285618	33.2771	2.05962	0.313787	32.2844	0.970074	-0.0131951	33.2771	0.969692	-0.0133662	32.2844	0.981992	-0.00789189	33.2771	1.42195	0.152883
Sample	Sample Osteogenic	Human	Human Osteogenic	H5	H5 Osteogenic	H21792	H21792 Osteogenic	H21792 Osteogenic - ALB	Osteogenic	ALB	1	H5O2	study-collection-qPCR-H5 - plate1	2020-09-25	Emilie Briscoe	34.8866	1.97696	32.2844	1.10544	0.0435342	33.2771	2.2918	0.360177	32.2844	0.942197	-0.0258581	33.2771	0.941826	-0.0260292	32.2844	1.02256	0.00968713	33.2771	1.48068	0.170462
Sample	Sample Osteogenic	Human	Human Osteogenic	H5	H5 Osteogenic	H21792	H21792 Osteogenic	H21792 Osteogenic - ALB	Osteogenic	ALB	2	H5O2	study-collection-qPCR-H5 - plate1	2020-09-25	Emilie Briscoe	34.6777	1.97696	32.2844	0.689649	-0.161372	33.2771	1.42979	0.155272	32.2844	0.872406	-0.0592816	33.2771	0.872062	-0.0594527	32.2844	0.774562	-0.110944	33.2771	1.12158	0.049831
Sample	Sample Osteogenic	Human	Human Osteogenic	H5	H5 Osteogenic	H21792	H21792 Osteogenic	H21792 Osteogenic - ALB	Osteogenic	ALB	3	H5O2	study-collection-qPCR-H5 - plate1	2020-09-25	Emilie Briscoe	32.5918	1.97696	32.2844	2.48696	0.395668	33.2771	5.15598	0.712311	32.2844	2.06033	0.313937	33.2771	2.05952	0.313766	32.2844	2.26794	0.355632	33.2771	3.28403	0.516406
Sample	Sample iPSC	Human	Human iPSC	H6	H6 iPSC	H20961	H20961 iPSC	H20961 iPSC - ALB	iPSC	ALB	1	H6I2	study-collection-qPCR-H6 - plate1	2020-10-09	Emilie Briscoe	36.4582	1.97449	34.6649	0.519096	-0.284752	35.5126	1.50855	0.178561	34.6649	0.526895	-0.278276	35.5126	0.21553	-0.666492	34.6649	0.524805	-0.280002	35.5126	0.536797	-0.27019
Sample	Sample iPSC	Human	Human iPSC	H6	H6 iPSC	H20961	H20961 iPSC	H20961 iPSC - ALB	iPSC	ALB	2	H6I2	study-collection-qPCR-H6 - plate1	2020-10-09	Emilie Briscoe	33.2346	1.97449	34.6649	2.17097	0.336653	35.5126	6.30908	0.799966	34.6649	2.31711	0.364947	35.5126	0.947833	-0.0232684	34.6649	2.24546	0.351306	35.5126	2.29677	0.361118
Sample	Sample iPSC	Human	Human iPSC	H6	H6 iPSC	H20961	H20961 iPSC	H20961 iPSC - ALB	iPSC	ALB	3	H6I2	study-collection-qPCR-H6 - plate1	2020-10-09	Emilie Briscoe	34.302	1.97449	34.6649	0.887358	-0.0519013	35.5126	2.57876	0.411412	34.6649	0.819084	-0.0866716	35.5126	0.335052	-0.474887	34.6649	0.848586	-0.0713039	35.5126	0.867977	-0.0614916
Sample	Sample MSC	Human	Human MSC	H6	H6 MSC	H20961	H20961 MSC	H20961 MSC - ALB	MSC	ALB	1	H6M2	study-collection-qPCR-H6 - plate1	2020-10-09	Emilie Briscoe	37.4576	1.97449	34.6649	0.0884275	-1.05341	35.5126	0.256981	-0.5901	34.6649	0.903222	-0.0442056	35.5126	0.369469	-0.432421	34.6649	0.304922	-0.515811	35.5126	0.31189	-0.505998
Sample	Sample MSC	Human	Human MSC	H6	H6 MSC	H20961	H20961 MSC	H20961 MSC - ALB	MSC	ALB	2	H6M2	study-collection-qPCR-H6 - plate1	2020-10-09	Emilie Briscoe	34.6685	1.97449	34.6649	0.604763	-0.218415	35.5126	1.75751	0.244898	34.6649	3.87247	0.587988	35.5126	1.58406	0.199772	34.6649	1.62544	0.21097	35.5126	1.66258	0.220782
Sample	Sample MSC	Human	Human MSC	H6	H6 MSC	H20961	H20961 MSC	H20961 MSC - ALB	MSC	ALB	3	H6M2	study-collection-qPCR-H6 - plate1	2020-10-09	Emilie Briscoe	34.4118	1.97449	34.6649	0.761883	-0.118112	35.5126	2.21412	0.345201	34.6649	4.17701	0.620865	35.5126	1.70864	0.232649	34.6649	1.8854	0.275404	35.5126	1.92848	0.285216
Sample	Sample Adipogenic	Human	Human Adipogenic	H6	H6 Adipogenic	H20961	H20961 Adipogenic	H20961 Adipogenic - ALB	Adipogenic	ALB	1	H6A1	study-collection-qPCR-H6 - plate1	2020-10-09	Emilie Briscoe	34.4303	1.97449	34.6649	2.4689	0.392504	35.5126	7.17492	0.855817	34.6649	12.7193	1.10446	35.5126	5.20293	0.716248	34.6649	5.94726	0.774317	35.5126	6.08315	0.784129
Sample	Sample Adipogenic	Human	Human Adipogenic	H6	H6 Adipogenic	H20961	H20961 Adipogenic	H20961 Adipogenic - ALB	Adipogenic	ALB	2	H6A1	study-collection-qPCR-H6 - plate1	2020-10-09	Emilie Briscoe	34.4694	1.97449	34.6649	0.816592	-0.0879947	35.5126	2.37311	0.375318	34.6649	4.39953	0.643406	35.5126	1.79966	0.25519	34.6649	2.0032	0.301725	35.5126	2.04898	0.311537
Sample	Sample Adipogenic	Human	Human Adipogenic	H6	H6 Adipogenic	H20961	H20961 Adipogenic	H20961 Adipogenic - ALB	Adipogenic	ALB	3	H6A1	study-collection-qPCR-H6 - plate1	2020-10-09	Emilie Briscoe	35.3223	1.97449	34.6649	0.751932	-0.123822	35.5126	2.1852	0.339491	34.6649	2.69772	0.430996	35.5126	1.10352	0.0427803	34.6649	1.48854	0.172761	35.5126	1.52256	0.182574
Sample	Sample Chondrogenic	Human	Human Chondrogenic	H6	H6 Chondrogenic	H20961	H20961 Chondrogenic	H20961 Chondrogenic - ALB	Chondrogenic	ALB	1	H6C1	study-collection-qPCR-H6 - plate1	2020-10-09	Emilie Briscoe	33.3535	1.97449	34.6649	32.3803	1.51028	35.5126	94.101	1.97359	34.6649	52.0608	1.71651	35.5126	21.2959	1.3283	34.6649	42.2966	1.62631	35.5126	43.2631	1.63612
Sample	Sample Chondrogenic	Human	Human Chondrogenic	H6	H6 Chondrogenic	H20961	H20961 Chondrogenic	H20961 Chondrogenic - ALB	Chondrogenic	ALB	2	H6C1	study-collection-qPCR-H6 - plate1	2020-10-09	Emilie Briscoe	32.1706	1.97449	34.6649	11.9445	1.07717	35.5126	34.7122	1.54048	34.6649	14.9727	1.1753	35.5126	6.12468	0.787083	34.6649	13.5317	1.13135	35.5126	13.841	1.14117
Sample	Sample Chondrogenic	Human	Human Chondrogenic	H6	H6 Chondrogenic	H20961	H20961 Chondrogenic	H20961 Chondrogenic - ALB	Chondrogenic	ALB	3	H6C1	study-collection-qPCR-H6 - plate1	2020-10-09	Emilie Briscoe	32.7092	1.97449	34.6649	4.96607	0.696013	35.5126	14.432	1.15933	34.6649	12.6604	1.10245	35.5126	5.17883	0.714232	34.6649	8.19649	0.913628	35.5126	8.38378	0.92344
Sample	Sample Osteogenic	Human	Human Osteogenic	H6	H6 Osteogenic	H20961	H20961 Osteogenic	H20961 Osteogenic - ALB	Osteogenic	ALB	1	H6O3	study-collection-qPCR-H6 - plate1	2020-10-09	Emilie Briscoe	34.5089	1.97449	34.6649	3.30579	0.519275	35.5126	9.607	0.982588	34.6649	4.53991	0.657048	35.5126	1.85708	0.268832	34.6649	3.93845	0.595325	35.5126	4.02845	0.605138
Sample	Sample Osteogenic	Human	Human Osteogenic	H6	H6 Osteogenic	H20961	H20961 Osteogenic	H20961 Osteogenic - ALB	Osteogenic	ALB	2	H6O3	study-collection-qPCR-H6 - plate1	2020-10-09	Emilie Briscoe	34.8708	1.97449	34.6649	2.32438	0.366306	35.5126	6.7549	0.829619	34.6649	2.68201	0.42846	35.5126	1.09709	0.0402441	34.6649	2.52198	0.401742	35.5126	2.57961	0.411554
Sample	Sample Osteogenic	Human	Human Osteogenic	H6	H6 Osteogenic	H20961	H20961 Osteogenic	H20961 Osteogenic - ALB	Osteogenic	ALB	3	H6O3	study-collection-qPCR-H6 - plate1	2020-10-09	Emilie Briscoe	34.3887	1.97449	34.6649	3.04253	0.483235	35.5126	8.84195	0.946548	34.6649	4.0907	0.611797	35.5126	1.67333	0.223581	34.6649	3.58089	0.553991	35.5126	3.66271	0.563803
Sample	Sample C8861 iPSC	Chimpanzee	Chimpanzee C8861 iPSC	C1	C1 C8861 iPSC	C8861	C8861 iPSC	C8861 iPSC - ALB	C8861 iPSC	ALB	1	C1I2	study-collection-qPCR-C1	2020-06-30	Emilie Briscoe	30.0251	1.94931							30.1142	1.19947	0.0789907	36.1038	26.9986	1.43134
Sample	Sample C8861 iPSC	Chimpanzee	Chimpanzee C8861 iPSC	C1	C1 C8861 iPSC	C8861	C8861 iPSC	C8861 iPSC - ALB	C8861 iPSC	ALB	2	C1I2	study-collection-qPCR-C1	2020-06-30	Emilie Briscoe	30.1679	1.94931							30.1142	1.32632	0.122648	36.1038	29.8537	1.475
Sample	Sample C8861 iPSC	Chimpanzee	Chimpanzee C8861 iPSC	C1	C1 C8861 iPSC	C8861	C8861 iPSC	C8861 iPSC - ALB	C8861 iPSC	ALB	3	C1I2	study-collection-qPCR-C1	2020-06-30	Emilie Briscoe	30.1495	1.94931							30.1142	0.62858	-0.201639	36.1038	14.1485	1.15071
Sample	Sample C8861 MSC	Chimpanzee	Chimpanzee C8861 MSC	C1	C1 C8861 MSC	C8861	C8861 MSC	C8861 MSC - ALB	C8861 MSC	ALB	1	C1M2	study-collection-qPCR-C1	2020-06-30	Emilie Briscoe	36.1038	1.94931							30.1142	0.0789895	-1.10243	36.1038	1.77795	0.249919
Sample	Sample C8861 MSC	Chimpanzee	Chimpanzee C8861 MSC	C1	C1 C8861 MSC	C8861	C8861 MSC	C8861 MSC - ALB	C8861 MSC	ALB	2	C1M2	study-collection-qPCR-C1	2020-06-30	Emilie Briscoe	Undetermined	1.94931							30.1142			36.1038
Sample	Sample C8861 Adipogenic	Chimpanzee	Chimpanzee C8861 Adipogenic	C1	C1 C8861 Adipogenic	C8861	C8861 Adipogenic	C8861 Adipogenic - ALB	C8861 Adipogenic	ALB	1	C1A1	study-collection-qPCR-C1	2020-06-30	Emilie Briscoe	34.1615	1.94931							30.1142	0.288231	-0.54026	36.1038	6.48769	0.81209
Sample	Sample C8861 Adipogenic	Chimpanzee	Chimpanzee C8861 Adipogenic	C1	C1 C8861 Adipogenic	C8861	C8861 Adipogenic	C8861 Adipogenic - ALB	C8861 Adipogenic	ALB	2	C1A1	study-collection-qPCR-C1	2020-06-30	Emilie Briscoe	34.9954	1.94931							30.1142	0.085442	-1.06833	36.1038	1.92319	0.284021
Sample	Sample C8861 Adipogenic	Chimpanzee	Chimpanzee C8861 Adipogenic	C1	C1 C8861 Adipogenic	C8861	C8861 Adipogenic	C8861 Adipogenic - ALB	C8861 Adipogenic	ALB	3	C1A1	study-collection-qPCR-C1	2020-06-30	Emilie Briscoe	35.9129	1.94931							30.1142	0.0316851	-1.49914	36.1038	0.713191	-0.146794
Sample	Sample C8861 Chondrogenic	Chimpanzee	Chimpanzee C8861 Chondrogenic	C1	C1 C8861 Chondrogenic	C8861	C8861 Chondrogenic	C8861 Chondrogenic - ALB	C8861 Chondrogenic	ALB	1	C1C2	study-collection-qPCR-C1	2020-06-30	Emilie Briscoe	34.3931	1.94931							30.1142	0.132683	-0.877185	36.1038	2.98652	0.475165
Sample	Sample C8861 Chondrogenic	Chimpanzee	Chimpanzee C8861 Chondrogenic	C1	C1 C8861 Chondrogenic	C8861	C8861 Chondrogenic	C8861 Chondrogenic - ALB	C8861 Chondrogenic	ALB	2	C1C2	study-collection-qPCR-C1	2020-06-30	Emilie Briscoe	35.1844	1.94931							30.1142	0.0964378	-1.01575	36.1038	2.17069	0.336597
Sample	Sample C8861 Chondrogenic	Chimpanzee	Chimpanzee C8861 Chondrogenic	C1	C1 C8861 Chondrogenic	C8861	C8861 Chondrogenic	C8861 Chondrogenic - ALB	C8861 Chondrogenic	ALB	3	C1C2	study-collection-qPCR-C1	2020-06-30	Emilie Briscoe	34.9408	1.94931							30.1142	0.0903336	-1.04415	36.1038	2.03329	0.308199
Sample	Sample iPSC	Chimpanzee	Chimpanzee iPSC	C1-r2	C1-r2 iPSC	C8861	C8861 (rep2) iPSC	C8861 (rep2) iPSC - ALB	iPSC	ALB	1	C1Ir2	study-collection-qPCR-C1r - plate1	2020-10-30	Emilie Briscoe	30.732	2.00724	29.9837	1.26557	0.102287	32.4356	16.7664	1.22444	29.9837	1.37927	0.139651	32.4356	4.76071	0.677672	29.9837	1.3224	0.121361	32.4356	9.28321	0.967698
Sample	Sample iPSC	Chimpanzee	Chimpanzee iPSC	C1-r2	C1-r2 iPSC	C8861	C8861 (rep2) iPSC	C8861 (rep2) iPSC - ALB	iPSC	ALB	2	C1Ir2	study-collection-qPCR-C1r - plate1	2020-10-30	Emilie Briscoe	29.5775	2.00724	29.9837	0.927937	-0.0324817	32.4356	12.2934	1.08967	29.9837	0.680411	-0.167229	32.4356	2.34851	0.370792	29.9837	0.799664	-0.0970924	32.4356	5.61364	0.749244
Sample	Sample iPSC	Chimpanzee	Chimpanzee iPSC	C1-r2	C1-r2 iPSC	C8861	C8861 (rep2) iPSC	C8861 (rep2) iPSC - ALB	iPSC	ALB	3	C1Ir2	study-collection-qPCR-C1r - plate1	2020-10-30	Emilie Briscoe	29.6417	2.00724	29.9837	0.851519	-0.0698056	32.4356	11.281	1.05235	29.9837	1.06556	0.0275779	32.4356	3.67789	0.565599	29.9837	0.945652	-0.0242688	32.4356	6.63847	0.822068
Sample	Sample MSC	Chimpanzee	Chimpanzee MSC	C1-r2	C1-r2 MSC	C8861	C8861 (rep2) MSC	C8861 (rep2) MSC - ALB	MSC	ALB	1	C1Mr1	study-collection-qPCR-C1r - plate1	2020-10-30	Emilie Briscoe	32.8438	2.00724	29.9837	0.0680944	-1.16689	32.4356	0.902119	-0.0447364	29.9837	0.446134	-0.350535	32.4356	1.53988	0.187486	29.9837	0.165772	-0.78049	32.4356	1.16372	0.0658467
Sample	Sample MSC	Chimpanzee	Chimpanzee MSC	C1-r2	C1-r2 MSC	C8861	C8861 (rep2) MSC	C8861 (rep2) MSC - ALB	MSC	ALB	2	C1Mr1	study-collection-qPCR-C1r - plate1	2020-10-30	Emilie Briscoe	31.7835	2.00724	29.9837	0.106467	-0.972785	32.4356	1.41048	0.149367	29.9837	0.285307	-0.544688	32.4356	0.984766	-0.0066671	29.9837	0.169335	-0.771252	32.4356	1.18873	0.0750847
Sample	Sample MSC	Chimpanzee	Chimpanzee MSC	C1-r2	C1-r2 MSC	C8861	C8861 (rep2) MSC	C8861 (rep2) MSC - ALB	MSC	ALB	3	C1Mr1	study-collection-qPCR-C1r - plate1	2020-10-30	Emilie Briscoe	32.6794	2.00724	29.9837	0.0593222	-1.22678	32.4356	0.785903	-0.104631	29.9837	0.191056	-0.718839	32.4356	0.659449	-0.180819	29.9837	0.102975	-0.987268	32.4356	0.722884	-0.140931
Sample	Sample Adipogenic	Chimpanzee	Chimpanzee Adipogenic	C1-r2	C1-r2 Adipogenic	C8861	C8861 (rep2) Adipogenic	C8861 (rep2) Adipogenic - ALB	Adipogenic	ALB	1	C1Ar2	study-collection-qPCR-C1r - plate1	2020-10-30	Emilie Briscoe	30.6984	2.00724	29.9837	2.70552	0.432251	32.4356	35.8429	1.5544	29.9837	0.484449	-0.314752	32.4356	1.67213	0.223269	29.9837	1.20279	0.080189	32.4356	8.44356	0.926526
Sample	Sample Adipogenic	Chimpanzee	Chimpanzee Adipogenic	C1-r2	C1-r2 Adipogenic	C8861	C8861 (rep2) Adipogenic	C8861 (rep2) Adipogenic - ALB	Adipogenic	ALB	2	C1Ar2	study-collection-qPCR-C1r - plate1	2020-10-30	Emilie Briscoe	29.7243	2.00724	29.9837	2.18652	0.339753	32.4356	28.9671	1.46191	29.9837	0.467179	-0.330517	32.4356	1.61252	0.207504	29.9837	1.05331	0.022555	32.4356	7.39421	0.868892
Sample	Sample Adipogenic	Chimpanzee	Chimpanzee Adipogenic	C1-r2	C1-r2 Adipogenic	C8861	C8861 (rep2) Adipogenic	C8861 (rep2) Adipogenic - ALB	Adipogenic	ALB	3	C1Ar2	study-collection-qPCR-C1r - plate1	2020-10-30	Emilie Briscoe	30.7209	2.00724	29.9837	1.31249	0.118097	32.4356	17.388	1.24025	29.9837	0.324435	-0.488872	32.4356	1.11982	0.0491484	29.9837	0.678078	-0.16872	32.4356	4.7601	0.677616
Sample	Sample Chondrogenic	Chimpanzee	Chimpanzee Chondrogenic	C1-r2	C1-r2 Chondrogenic	C8861	C8861 (rep2) Chondrogenic	C8861 (rep2) Chondrogenic - ALB	Chondrogenic	ALB	1	C1Cr2	study-collection-qPCR-C1r - plate1	2020-10-30	Emilie Briscoe	33.5625	2.00724	29.9837	0.194279	-0.711573	32.4356	2.57382	0.410579	29.9837	0.534968	-0.271672	32.4356	1.8465	0.266348	29.9837	0.31536	-0.501194	32.4356	2.21382	0.345143
Sample	Sample Chondrogenic	Chimpanzee	Chimpanzee Chondrogenic	C1-r2	C1-r2 Chondrogenic	C8861	C8861 (rep2) Chondrogenic	C8861 (rep2) Chondrogenic - ALB	Chondrogenic	ALB	2	C1Cr2	study-collection-qPCR-C1r - plate1	2020-10-30	Emilie Briscoe	31.2801	2.00724	29.9837	0.375428	-0.425473	32.4356	4.97369	0.696679	29.9837	0.243922	-0.612749	32.4356	0.841922	-0.0747283	29.9837	0.305823	-0.51453	32.4356	2.14687	0.331807
Sample	Sample Chondrogenic	Chimpanzee	Chimpanzee Chondrogenic	C1-r2	C1-r2 Chondrogenic	C8861	C8861 (rep2) Chondrogenic	C8861 (rep2) Chondrogenic - ALB	Chondrogenic	ALB	3	C1Cr2	study-collection-qPCR-C1r - plate1	2020-10-30	Emilie Briscoe	32.334	2.00724	29.9837	0.218497	-0.660555	32.4356	2.89466	0.461597	29.9837	0.0895891	-1.04774	32.4356	0.309226	-0.509724	29.9837	0.143155	-0.844195	32.4356	1.00494	0.00214185
Sample	Sample Osteogenic	Chimpanzee	Chimpanzee Osteogenic	C1-r2	C1-r2 Osteogenic	C8861	C8861 (rep2) Osteogenic	C8861 (rep2) Osteogenic - ALB	Osteogenic	ALB	1	C1Or2	study-collection-qPCR-C1r - plate1	2020-10-30	Emilie Briscoe	32.5511	2.00724	29.9837	1.28985	0.11054	32.4356	17.088	1.23269	29.9837	0.1527	-0.81616	32.4356	0.527061	-0.278139	29.9837	0.472197	-0.325877	32.4356	3.31482	0.52046
Sample	Sample Osteogenic	Chimpanzee	Chimpanzee Osteogenic	C1-r2	C1-r2 Osteogenic	C8861	C8861 (rep2) Osteogenic	C8861 (rep2) Osteogenic - ALB	Osteogenic	ALB	2	C1Or2	study-collection-qPCR-C1r - plate1	2020-10-30	Emilie Briscoe	31.8993	2.00724	29.9837	0.59806	-0.223255	32.4356	7.92313	0.898897	29.9837	0.109346	-0.961197	32.4356	0.377419	-0.423176	29.9837	0.267794	-0.572199	32.4356	1.87991	0.274137
Sample	Sample Osteogenic	Chimpanzee	Chimpanzee Osteogenic	C1-r2	C1-r2 Osteogenic	C8861	C8861 (rep2) Osteogenic	C8861 (rep2) Osteogenic - ALB	Osteogenic	ALB	3	C1Or2	study-collection-qPCR-C1r - plate1	2020-10-30	Emilie Briscoe	32.3336	2.00724	29.9837	0.5464	-0.262489	32.4356	7.23874	0.859663	29.9837	0.106538	-0.972497	32.4356	0.367725	-0.434477	29.9837	0.252467	-0.597796	32.4356	1.77231	0.248541
Sample	Sample iPSC	Chimpanzee	Chimpanzee iPSC	C2	C2 iPSC	C3647	C3647 iPSC	C3647 iPSC - ALB	iPSC	ALB	1	C2I2	study-collection-qPCR-C2 - plate1	2020-08-12	Emilie Briscoe	31.5637	1.9692	30.9763	1.93187	0.285978	32.2385	1.51821	0.18133	30.9763	0.901647	-0.0449637	32.2385	1.97371	0.295283	30.9763	1.29436	0.112056	32.2385	1.74531	0.241874
Sample	Sample iPSC	Chimpanzee	Chimpanzee iPSC	C2	C2 iPSC	C3647	C3647 iPSC	C3647 iPSC - ALB	iPSC	ALB	2	C2I2	study-collection-qPCR-C2 - plate1	2020-08-12	Emilie Briscoe	31.1526	1.9692	30.9763	0.495037	-0.305362	32.2385	0.389036	-0.41001	30.9763	0.706516	-0.150878	32.2385	1.54657	0.189369	30.9763	0.596543	-0.224359	32.2385	0.804376	-0.0945411
Sample	Sample iPSC	Chimpanzee	Chimpanzee iPSC	C2	C2 iPSC	C3647	C3647 iPSC	C3647 iPSC - ALB	iPSC	ALB	3	C2I2	study-collection-qPCR-C2 - plate1	2020-08-12	Emilie Briscoe	30.2127	1.9692	30.9763	1.04564	0.019384	32.2385	0.821743	-0.0852638	30.9763	1.56979	0.195842	32.2385	3.43628	0.536088	30.9763	1.2951	0.112302	32.2385	1.7463	0.24212
Sample	Sample MSC	Chimpanzee	Chimpanzee MSC	C2	C2 MSC	C3647	C3647 MSC	C3647 MSC - ALB	MSC	ALB	1	C2M2	study-collection-qPCR-C2 - plate1	2020-08-12	Emilie Briscoe	32.8549	1.9692	30.9763	1.41872	0.151898	32.2385	1.11494	0.0472503	30.9763	0.429773	-0.366761	32.2385	0.940775	-0.0265143	30.9763	0.757281	-0.120743	32.2385	1.02111	0.00907432
Sample	Sample MSC	Chimpanzee	Chimpanzee MSC	C2	C2 MSC	C3647	C3647 MSC	C3647 MSC - ALB	MSC	ALB	2	C2M2	study-collection-qPCR-C2 - plate1	2020-08-12	Emilie Briscoe	31.8325	1.9692	30.9763	1.01212	0.00523204	32.2385	0.795398	-0.0994158	30.9763	0.571032	-0.24334	32.2385	1.24999	0.0969067	30.9763	0.748497	-0.12581	32.2385	1.00927	0.00400763
Sample	Sample MSC	Chimpanzee	Chimpanzee MSC	C2	C2 MSC	C3647	C3647 MSC	C3647 MSC - ALB	MSC	ALB	3	C2M2	study-collection-qPCR-C2 - plate1	2020-08-12	Emilie Briscoe	32.0282	1.9692	30.9763	1.43487	0.156813	32.2385	1.12763	0.0521655	30.9763	0.388473	-0.410639	32.2385	0.850369	-0.0703925	30.9763	0.719616	-0.142899	32.2385	0.970327	-0.0130819
Sample	Sample Adipogenic	Chimpanzee	Chimpanzee Adipogenic	C2	C2 Adipogenic	C3647	C3647 Adipogenic	C3647 Adipogenic - ALB	Adipogenic	ALB	1	C2A2	study-collection-qPCR-C2 - plate1	2020-08-12	Emilie Briscoe	28.3036	1.9692	30.9763	35.0328	1.54447	32.2385	27.5313	1.43983	30.9763	3.94413	0.595951	32.2385	8.63372	0.936198	30.9763	11.0507	1.04339	32.2385	14.9007	1.17321
Sample	Sample Adipogenic	Chimpanzee	Chimpanzee Adipogenic	C2	C2 Adipogenic	C3647	C3647 Adipogenic	C3647 Adipogenic - ALB	Adipogenic	ALB	2	C2A2	study-collection-qPCR-C2 - plate1	2020-08-12	Emilie Briscoe	27.804	1.9692	30.9763	34.274	1.53497	32.2385	26.935	1.43032	30.9763	5.08656	0.706424	32.2385	11.1345	1.04667	30.9763	12.502	1.09698	32.2385	16.8577	1.2268
Sample	Sample Adipogenic	Chimpanzee	Chimpanzee Adipogenic	C2	C2 Adipogenic	C3647	C3647 Adipogenic	C3647 Adipogenic - ALB	Adipogenic	ALB	3	C2A2	study-collection-qPCR-C2 - plate1	2020-08-12	Emilie Briscoe	27.6192	1.9692	30.9763	46.4727	1.6672	32.2385	36.5216	1.56255	30.9763	6.45986	0.810223	32.2385	14.1406	1.15047	30.9763	16.3851	1.21445	32.2385	22.0936	1.34427
Sample	Sample Chondrogenic	Chimpanzee	Chimpanzee Chondrogenic	C2	C2 Chondrogenic	C3647	C3647 Chondrogenic	C3647 Chondrogenic - ALB	Chondrogenic	ALB	1	C2C2	study-collection-qPCR-C2 - plate1	2020-08-12	Emilie Briscoe	32.9968	1.9692	30.9763	4.85377	0.686079	32.2385	3.81445	0.581431	30.9763	0.456869	-0.340209	32.2385	1.00009	3.7804e-05	30.9763	1.39979	0.146063	32.2385	1.88747	0.275881
Sample	Sample Chondrogenic	Chimpanzee	Chimpanzee Chondrogenic	C2	C2 Chondrogenic	C3647	C3647 Chondrogenic	C3647 Chondrogenic - ALB	Chondrogenic	ALB	2	C2C2	study-collection-qPCR-C2 - plate1	2020-08-12	Emilie Briscoe	31.8385	1.9692	30.9763	8.08462	0.90766	32.2385	6.35348	0.803012	30.9763	0.687712	-0.162593	32.2385	1.5054	0.177653	30.9763	2.20646	0.343697	32.2385	2.97519	0.473514
Sample	Sample Chondrogenic	Chimpanzee	Chimpanzee Chondrogenic	C2	C2 Chondrogenic	C3647	C3647 Chondrogenic	C3647 Chondrogenic - ALB	Chondrogenic	ALB	3	C2C2	study-collection-qPCR-C2 - plate1	2020-08-12	Emilie Briscoe	31.9197	1.9692	30.9763	7.33371	0.865323	32.2385	5.76336	0.760676	30.9763	0.687575	-0.16268	32.2385	1.5051	0.177567	30.9763	2.10742	0.323752	32.2385	2.84164	0.453569
Sample	Sample Osteogenic	Chimpanzee	Chimpanzee Osteogenic	C2	C2 Osteogenic	C3647	C3647 Osteogenic	C3647 Osteogenic - ALB	Osteogenic	ALB	1	C2O1	study-collection-qPCR-C2 - plate1	2020-08-12	Emilie Briscoe	33.0664	1.9692	30.9763	3.37003	0.527634	32.2385	2.64842	0.422987	30.9763	0.324976	-0.488149	32.2385	0.711374	-0.147902	30.9763	0.983022	-0.00743693	32.2385	1.3255	0.122381
Sample	Sample Osteogenic	Chimpanzee	Chimpanzee Osteogenic	C2	C2 Osteogenic	C3647	C3647 Osteogenic	C3647 Osteogenic - ALB	Osteogenic	ALB	2	C2O1	study-collection-qPCR-C2 - plate1	2020-08-12	Emilie Briscoe	34.3514	1.9692	30.9763	1.03746	0.0159711	32.2385	0.815311	-0.0886767	30.9763	0.0689673	-1.16136	32.2385	0.15097	-0.82111	30.9763	0.247932	-0.605667	32.2385	0.334311	-0.47585
Sample	Sample Osteogenic	Chimpanzee	Chimpanzee Osteogenic	C2	C2 Osteogenic	C3647	C3647 Osteogenic	C3647 Osteogenic - ALB	Osteogenic	ALB	3	C2O1	study-collection-qPCR-C2 - plate1	2020-08-12	Emilie Briscoe	32.9048	1.9692	30.9763	2.12316	0.326983	32.2385	1.66854	0.222336	30.9763	0.159537	-0.797138	32.2385	0.349227	-0.456892	30.9763	0.540899	-0.266884	32.2385	0.729346	-0.137067
Sample	Sample iPSC	Chimpanzee	Chimpanzee iPSC	C3	C3 iPSC	C3649	C3649 iPSC	C3649 iPSC - ALB	iPSC	ALB	1	C3I2	study-collection-qPCR-C3 - plate1	2020-09-01	Emilie Briscoe	30.6583	2.02726	30.4344	1.03639	0.0155235	33.7412	5.03616	0.7021	30.4344	1.0257	0.0110192	33.7412	3.80921	0.580835	30.4344	1.03103	0.0132732	33.7412	4.36537	0.640021
Sample	Sample iPSC	Chimpanzee	Chimpanzee iPSC	C3	C3 iPSC	C3649	C3649 iPSC	C3649 iPSC - ALB	iPSC	ALB	2	C3I2	study-collection-qPCR-C3 - plate1	2020-09-01	Emilie Briscoe	30.7536	2.02726	30.4344	0.898582	-0.0464425	33.7412	4.3665	0.640134	30.4344	0.732369	-0.13527	33.7412	2.71986	0.434546	30.4344	0.809508	-0.0917787	33.7412	3.42743	0.534969
Sample	Sample iPSC	Chimpanzee	Chimpanzee iPSC	C3	C3 iPSC	C3649	C3649 iPSC	C3649 iPSC - ALB	iPSC	ALB	3	C3I2	study-collection-qPCR-C3 - plate1	2020-09-01	Emilie Briscoe	29.8913	2.02726	30.4344	1.07379	0.030919	33.7412	5.2179	0.717495	30.4344	1.33122	0.124251	33.7412	4.94387	0.694067	30.4344	1.19813	0.0785055	33.7412	5.07287	0.705253
Sample	Sample MSC	Chimpanzee	Chimpanzee MSC	C3	C3 MSC	C3649	C3649 MSC	C3649 MSC - ALB	MSC	ALB	1	C3M2	study-collection-qPCR-C3 - plate1	2020-09-01	Emilie Briscoe	35.1079	2.02726	30.4344	0.131998	-0.879434	33.7412	0.64142	-0.192858	30.4344	0.10892	-0.962891	33.7412	0.404506	-0.393075	30.4344	0.119749	-0.921727	33.7412	0.507015	-0.29498
Sample	Sample MSC	Chimpanzee	Chimpanzee MSC	C3	C3 MSC	C3649	C3649 MSC	C3649 MSC - ALB	MSC	ALB	2	C3M2	study-collection-qPCR-C3 - plate1	2020-09-01	Emilie Briscoe	32.3214	2.02726	30.4344	0.520227	-0.283808	33.7412	2.52795	0.402769	30.4344	0.726474	-0.13878	33.7412	2.69796	0.431036	30.4344	0.617217	-0.209562	33.7412	2.61328	0.417186
Sample	Sample MSC	Chimpanzee	Chimpanzee MSC	C3	C3 MSC	C3649	C3649 MSC	C3649 MSC - ALB	MSC	ALB	3	C3M2	study-collection-qPCR-C3 - plate1	2020-09-01	Emilie Briscoe	33.7944	2.02726	30.4344	0.126915	-0.896487	33.7412	0.616721	-0.209911	30.4344	0.246731	-0.607777	33.7412	0.916303	-0.0379611	30.4344	0.178257	-0.748954	33.7412	0.754733	-0.122206
Sample	Sample Adipogenic	Chimpanzee	Chimpanzee Adipogenic	C3	C3 Adipogenic	C3649	C3649 Adipogenic	C3649 Adipogenic - ALB	Adipogenic	ALB	1	C3A2	study-collection-qPCR-C3 - plate1	2020-09-01	Emilie Briscoe	33.7203	2.02726	30.4344	0.113371	-0.945497	33.7412	0.550909	-0.25892	30.4344	0.0849344	-1.07092	33.7412	0.315428	-0.5011	30.4344	0.097833	-1.00951	33.7412	0.414222	-0.382767
Sample	Sample Adipogenic	Chimpanzee	Chimpanzee Adipogenic	C3	C3 Adipogenic	C3649	C3649 Adipogenic	C3649 Adipogenic - ALB	Adipogenic	ALB	2	C3A2	study-collection-qPCR-C3 - plate1	2020-09-01	Emilie Briscoe	33.3273	2.02726	30.4344	0.103158	-0.986495	33.7412	0.501281	-0.299919	30.4344	0.0557269	-1.25393	33.7412	0.206958	-0.684119	30.4344	0.0753107	-1.12314	33.7412	0.318863	-0.496395
Sample	Sample Adipogenic	Chimpanzee	Chimpanzee Adipogenic	C3	C3 Adipogenic	C3649	C3649 Adipogenic	C3649 Adipogenic - ALB	Adipogenic	ALB	3	C3A2	study-collection-qPCR-C3 - plate1	2020-09-01	Emilie Briscoe	30.998	2.02726	30.4344	0.849319	-0.0709293	33.7412	4.12712	0.615647	30.4344	0.305808	-0.514551	33.7412	1.1357	0.0552654	30.4344	0.504152	-0.297439	33.7412	2.13456	0.329309
Sample	Sample Chondrogenic	Chimpanzee	Chimpanzee Chondrogenic	C3	C3 Chondrogenic	C3649	C3649 Chondrogenic	C3649 Chondrogenic - ALB	Chondrogenic	ALB	1	C3C2	study-collection-qPCR-C3 - plate1	2020-09-01	Emilie Briscoe	34.6057	2.02726	30.4344	0.203617	-0.691186	33.7412	0.989441	-0.00460995	30.4344	0.0295858	-1.52892	33.7412	0.109875	-0.959101	30.4344	0.0760871	-1.11869	33.7412	0.322151	-0.491941
Sample	Sample Chondrogenic	Chimpanzee	Chimpanzee Chondrogenic	C3	C3 Chondrogenic	C3649	C3649 Chondrogenic	C3649 Chondrogenic - ALB	Chondrogenic	ALB	2	C3C2	study-collection-qPCR-C3 - plate1	2020-09-01	Emilie Briscoe	33.1136	2.02726	30.4344	0.482329	-0.316657	33.7412	2.3438	0.36992	30.4344	0.0501786	-1.29948	33.7412	0.186352	-0.729666	30.4344	0.151945	-0.818313	33.7412	0.643332	-0.191565
Sample	Sample Chondrogenic	Chimpanzee	Chimpanzee Chondrogenic	C3	C3 Chondrogenic	C3649	C3649 Chondrogenic	C3649 Chondrogenic - ALB	Chondrogenic	ALB	3	C3C2	study-collection-qPCR-C3 - plate1	2020-09-01	Emilie Briscoe	32.5249	2.02726	30.4344	0.67481	-0.170819	33.7412	3.27912	0.515758	30.4344	0.0855632	-1.06771	33.7412	0.317763	-0.497897	30.4344	0.235175	-0.628608	33.7412	0.995726	-0.00186019
Sample	Sample Osteogenic	Chimpanzee	Chimpanzee Osteogenic	C3	C3 Osteogenic	C3649	C3649 Osteogenic	C3649 Osteogenic - ALB	Osteogenic	ALB	1	C3O2	study-collection-qPCR-C3 - plate1	2020-09-01	Emilie Briscoe	31.7825	2.02726	30.4344	2.65913	0.42474	33.7412	12.9216	1.11132	30.4344	0.60407	-0.218913	33.7412	2.24338	0.350903	30.4344	1.24884	0.0965072	33.7412	5.28756	0.723255
Sample	Sample Osteogenic	Chimpanzee	Chimpanzee Osteogenic	C3	C3 Osteogenic	C3649	C3649 Osteogenic	C3649 Osteogenic - ALB	Osteogenic	ALB	2	C3O2	study-collection-qPCR-C3 - plate1	2020-09-01	Emilie Briscoe	30.4842	2.02726	30.4344	3.58209	0.554137	33.7412	17.4066	1.24071	30.4344	0.916665	-0.0377891	33.7412	3.40429	0.532027	30.4344	1.78715	0.252162	33.7412	7.56676	0.87891
Sample	Sample Osteogenic	Chimpanzee	Chimpanzee Osteogenic	C3	C3 Osteogenic	C3649	C3649 Osteogenic	C3649 Osteogenic - ALB	Osteogenic	ALB	3	C3O2	study-collection-qPCR-C3 - plate1	2020-09-01	Emilie Briscoe	30.5438	2.02726	30.4344	4.32861	0.636349	33.7412	21.0341	1.32292	30.4344	1.24768	0.0961043	33.7412	4.63362	0.66592	30.4344	2.29525	0.360829	33.7412	9.718	0.987577
Sample	Sample iPSC	Chimpanzee	Chimpanzee iPSC	C4	C4 iPSC	C40210	C40210 iPSC	C40210 iPSC - ALB	iPSC	ALB	1	C4I2	study-collection-qPCR-C4 - plate1	2020-09-17	Emilie Briscoe	32.4462	1.98169	30.8953	0.544818	-0.263749	31.3954	3.38115	0.529065	30.8953	0.497	-0.303644	31.3954	0.929137	-0.0319201	30.8953	0.519916	-0.284067	31.3954	1.74313	0.241329
Sample	Sample iPSC	Chimpanzee	Chimpanzee iPSC	C4	C4 iPSC	C40210	C40210 iPSC	C40210 iPSC - ALB	iPSC	ALB	2	C4I2	study-collection-qPCR-C4 - plate1	2020-09-17	Emilie Briscoe	29.7774	1.98169	30.8953	1.90524	0.279949	31.3954	11.824	1.07276	30.8953	2.00493	0.302099	31.3954	3.7482	0.573823	30.8953	1.95565	0.291291	31.3954	6.55672	0.816687
Sample	Sample iPSC	Chimpanzee	Chimpanzee iPSC	C4	C4 iPSC	C40210	C40210 iPSC	C40210 iPSC - ALB	iPSC	ALB	3	C4I2	study-collection-qPCR-C4 - plate1	2020-09-17	Emilie Briscoe	30.4623	1.98169	30.8953	0.963384	-0.0162007	31.3954	5.97878	0.776613	30.8953	1.00356	0.00154415	31.3954	1.87615	0.273268	30.8953	0.983505	-0.00722352	31.3954	3.29741	0.518173
Sample	Sample MSC	Chimpanzee	Chimpanzee MSC	C4	C4 MSC	C40210	C40210 MSC	C40210 MSC - ALB	MSC	ALB	1	C4M2	study-collection-qPCR-C4 - plate1	2020-09-17	Emilie Briscoe	31.8559	1.98169	30.8953	0.139296	-0.85606	31.3954	0.864477	-0.0632465	30.8953	0.536565	-0.270378	31.3954	1.0031	0.00134579	30.8953	0.278398	-0.555333	31.3954	0.933389	-0.0299371
Sample	Sample MSC	Chimpanzee	Chimpanzee MSC	C4	C4 MSC	C40210	C40210 MSC	C40210 MSC - ALB	MSC	ALB	2	C4M2	study-collection-qPCR-C4 - plate1	2020-09-17	Emilie Briscoe	31.5062	1.98169	30.8953	0.128751	-0.890249	31.3954	0.799033	-0.0974351	30.8953	0.409936	-0.387284	31.3954	0.766372	-0.11556	30.8953	0.233225	-0.632224	31.3954	0.781937	-0.106828
Sample	Sample MSC	Chimpanzee	Chimpanzee MSC	C4	C4 MSC	C40210	C40210 MSC	C40210 MSC - ALB	MSC	ALB	3	C4M2	study-collection-qPCR-C4 - plate1	2020-09-17	Emilie Briscoe	30.824	1.98169	30.8953	0.233275	-0.632132	31.3954	1.44771	0.160682	30.8953	0.695811	-0.157509	31.3954	1.30081	0.114214	30.8953	0.408667	-0.388631	31.3954	1.37014	0.136765
Sample	Sample Adipogenic	Chimpanzee	Chimpanzee Adipogenic	C4	C4 Adipogenic	C40210	C40210 Adipogenic	C40210 Adipogenic - ALB	Adipogenic	ALB	1	C4A2	study-collection-qPCR-C4 - plate1	2020-09-17	Emilie Briscoe	32.32	1.98169	30.8953	1.25353	0.0981335	31.3954	7.77942	0.890947	30.8953	0.44704	-0.349654	31.3954	0.835736	-0.0779306	30.8953	0.738414	-0.1317	31.3954	2.47569	0.393696
Sample	Sample Adipogenic	Chimpanzee	Chimpanzee Adipogenic	C4	C4 Adipogenic	C40210	C40210 Adipogenic	C40210 Adipogenic - ALB	Adipogenic	ALB	2	C4A2	study-collection-qPCR-C4 - plate1	2020-09-17	Emilie Briscoe	31.1524	1.98169	30.8953	2.05341	0.312476	31.3954	12.7435	1.10529	30.8953	1.05451	0.0230521	31.3954	1.9714	0.294776	30.8953	1.45875	0.16398	31.3954	4.89076	0.689376
Sample	Sample Adipogenic	Chimpanzee	Chimpanzee Adipogenic	C4	C4 Adipogenic	C40210	C40210 Adipogenic	C40210 Adipogenic - ALB	Adipogenic	ALB	3	C4A2	study-collection-qPCR-C4 - plate1	2020-09-17	Emilie Briscoe	31.556	1.98169	30.8953	1.36826	0.136169	31.3954	8.49146	0.928982	30.8953	0.92539	-0.0336751	31.3954	1.73001	0.238048	30.8953	1.11979	0.0491356	31.3954	3.75432	0.574532
Sample	Sample Chondrogenic	Chimpanzee	Chimpanzee Chondrogenic	C4	C4 Chondrogenic	C40210	C40210 Chondrogenic	C40210 Chondrogenic - ALB	Chondrogenic	ALB	1	C4C2	study-collection-qPCR-C4 - plate1	2020-09-17	Emilie Briscoe	32.4005	1.98169	30.8953	4.61553	0.664222	31.3954	28.6441	1.45704	30.8953	0.777833	-0.109114	31.3954	1.45415	0.16261	30.8953	1.85148	0.267518	31.3954	6.20747	0.792914
Sample	Sample Chondrogenic	Chimpanzee	Chimpanzee Chondrogenic	C4	C4 Chondrogenic	C40210	C40210 Chondrogenic	C40210 Chondrogenic - ALB	Chondrogenic	ALB	2	C4C2	study-collection-qPCR-C4 - plate1	2020-09-17	Emilie Briscoe	31.7602	1.98169	30.8953	3.46971	0.540294	31.3954	21.5331	1.33311	30.8953	0.904793	-0.0434506	31.3954	1.6915	0.228273	30.8953	1.74101	0.240802	31.3954	5.83712	0.766198
Sample	Sample Chondrogenic	Chimpanzee	Chimpanzee Chondrogenic	C4	C4 Chondrogenic	C40210	C40210 Chondrogenic	C40210 Chondrogenic - ALB	Chondrogenic	ALB	3	C4C2	study-collection-qPCR-C4 - plate1	2020-09-17	Emilie Briscoe	32.6842	1.98169	30.8953	1.91441	0.282034	31.3954	11.8809	1.07485	30.8953	0.36272	-0.440429	31.3954	0.678101	-0.168706	30.8953	0.815062	-0.0888096	31.3954	2.73267	0.436587
Sample	Sample Osteogenic	Chimpanzee	Chimpanzee Osteogenic	C4	C4 Osteogenic	C40210	C40210 Osteogenic	C40210 Osteogenic - ALB	Osteogenic	ALB	1	C4O2	study-collection-qPCR-C4 - plate1	2020-09-17	Emilie Briscoe	32.7111	1.98169	30.8953	0.386282	-0.413096	31.3954	2.39728	0.379718	30.8953	0.866837	-0.0620627	31.3954	1.62054	0.209661	30.8953	0.585652	-0.23236	31.3954	1.96352	0.293036
Sample	Sample Osteogenic	Chimpanzee	Chimpanzee Osteogenic	C4	C4 Osteogenic	C40210	C40210 Osteogenic	C40210 Osteogenic - ALB	Osteogenic	ALB	2	C4O2	study-collection-qPCR-C4 - plate1	2020-09-17	Emilie Briscoe	32.8285	1.98169	30.8953	0.3523	-0.453087	31.3954	2.18638	0.339727	30.8953	0.318735	-0.496571	31.3954	0.595872	-0.224847	30.8953	0.33471	-0.475331	31.3954	1.12219	0.0500648
Sample	Sample Osteogenic	Chimpanzee	Chimpanzee Osteogenic	C4	C4 Osteogenic	C40210	C40210 Osteogenic	C40210 Osteogenic - ALB	Osteogenic	ALB	3	C4O2	study-collection-qPCR-C4 - plate1	2020-09-17	Emilie Briscoe	31.7992	1.98169	30.8953	0.653194	-0.184958	31.3954	4.05374	0.607856	30.8953	0.816842	-0.0878619	31.3954	1.52708	0.183862	30.8953	0.732968	-0.134915	31.3954	2.45743	0.390481
Sample	Sample iPSC	Chimpanzee	Chimpanzee iPSC	C5	C5 iPSC	C40280	C40280 iPSC	C40280 iPSC - ALB	iPSC	ALB	1	C5I2	study-collection-qPCR-C5 - plate1	2020-09-30	Emilie Briscoe	30.7769	2.09758	30.4437	1.14084	0.0572246	30.4574	0.290019	-0.537574	30.4437	0.975586	-0.0107343	30.4574	0.648427	-0.188139	30.4437	1.0511	0.0216447	30.4574	0.448845	-0.347904
Sample	Sample iPSC	Chimpanzee	Chimpanzee iPSC	C5	C5 iPSC	C40280	C40280 iPSC	C40280 iPSC - ALB	iPSC	ALB	2	C5I2	study-collection-qPCR-C5 - plate1	2020-09-30	Emilie Briscoe	30.3499	2.09758	30.4437	0.941463	-0.0261967	30.4574	0.239334	-0.620995	30.4437	0.742723	-0.129173	30.4574	0.493654	-0.306577	30.4437	0.822031	-0.0851116	30.4574	0.351026	-0.45466
Sample	Sample iPSC	Chimpanzee	Chimpanzee iPSC	C5	C5 iPSC	C40280	C40280 iPSC	C40280 iPSC - ALB	iPSC	ALB	3	C5I2	study-collection-qPCR-C5 - plate1	2020-09-30	Emilie Briscoe	30.2044	2.09758	30.4437	0.931048	-0.0310279	30.4574	0.236687	-0.625826	30.4437	1.38009	0.139907	30.4574	0.917282	-0.0374973	30.4437	1.15736	0.0634669	30.4574	0.494218	-0.306082
Sample	Sample MSC	Chimpanzee	Chimpanzee MSC	C5	C5 MSC	C40280	C40280 MSC	C40280 MSC - ALB	MSC	ALB	1	C5M2	study-collection-qPCR-C5 - plate1	2020-09-30	Emilie Briscoe	31.4049	2.09758	30.4437	2.04281	0.310228	30.4574	0.519313	-0.284571	30.4437	0.956932	-0.0191188	30.4574	0.636029	-0.196523	30.4437	1.36425	0.134894	30.4574	0.582567	-0.234654
Sample	Sample MSC	Chimpanzee	Chimpanzee MSC	C5	C5 MSC	C40280	C40280 MSC	C40280 MSC - ALB	MSC	ALB	2	C5M2	study-collection-qPCR-C5 - plate1	2020-09-30	Emilie Briscoe	30.3493	2.09758	30.4437	4.10863	0.613697	30.4574	1.04448	0.0188987	30.4437	1.18821	0.0748914	30.4574	0.789745	-0.102513	30.4437	2.0884	0.319814	30.4574	0.891796	-0.0497347
Sample	Sample MSC	Chimpanzee	Chimpanzee MSC	C5	C5 MSC	C40280	C40280 MSC	C40280 MSC - ALB	MSC	ALB	3	C5M2	study-collection-qPCR-C5 - plate1	2020-09-30	Emilie Briscoe	29.6178	2.09758	30.4437	7.25222	0.860471	30.4574	1.84362	0.265672	30.4437	2.9953	0.476441	30.4574	1.99084	0.299036	30.4437	4.50752	0.653938	30.4574	1.92481	0.284389
Sample	Sample Adipogenic	Chimpanzee	Chimpanzee Adipogenic	C5	C5 Adipogenic	C40280	C40280 Adipogenic	C40280 Adipogenic - ALB	Adipogenic	ALB	1	C5A2	study-collection-qPCR-C5 - plate1	2020-09-30	Emilie Briscoe	30.8457	2.09758	30.4437	14.7582	1.16903	30.4574	3.75175	0.574234	30.4437	1.19394	0.0769836	30.4574	0.793559	-0.100421	30.4437	3.76089	0.575291	30.4574	1.60599	0.205742
Sample	Sample Adipogenic	Chimpanzee	Chimpanzee Adipogenic	C5	C5 Adipogenic	C40280	C40280 Adipogenic	C40280 Adipogenic - ALB	Adipogenic	ALB	2	C5A2	study-collection-qPCR-C5 - plate1	2020-09-30	Emilie Briscoe	30.4409	2.09758	30.4437	4.41242	0.644676	30.4574	1.1217	0.0498779	30.4437	0.445965	-0.3507	30.4574	0.296412	-0.528104	30.4437	1.24355	0.0946615	30.4574	0.531022	-0.274887
Sample	Sample Adipogenic	Chimpanzee	Chimpanzee Adipogenic	C5	C5 Adipogenic	C40280	C40280 Adipogenic	C40280 Adipogenic - ALB	Adipogenic	ALB	3	C5A2	study-collection-qPCR-C5 - plate1	2020-09-30	Emilie Briscoe	30.0977	2.09758	30.4437	19.6466	1.29329	30.4574	4.99447	0.698489	30.4437	0.776856	-0.10966	30.4574	0.51634	-0.287064	30.4437	3.33086	0.522556	30.4574	1.42235	0.153008
Sample	Sample Chondrogenic	Chimpanzee	Chimpanzee Chondrogenic	C5	C5 Chondrogenic	C40280	C40280 Chondrogenic	C40280 Chondrogenic - ALB	Chondrogenic	ALB	1	C5C2	study-collection-qPCR-C5 - plate1	2020-09-30	Emilie Briscoe	33.3669	2.09758	30.4437	3.02327	0.480477	30.4574	0.768562	-0.114321	30.4437	0.260654	-0.583935	30.4574	0.173245	-0.761339	30.4437	0.802243	-0.0956939	30.4574	0.342576	-0.465243
Sample	Sample Chondrogenic	Chimpanzee	Chimpanzee Chondrogenic	C5	C5 Chondrogenic	C40280	C40280 Chondrogenic	C40280 Chondrogenic - ALB	Chondrogenic	ALB	2	C5C2	study-collection-qPCR-C5 - plate1	2020-09-30	Emilie Briscoe	32.4677	2.09758	30.4437	1.4701	0.167348	30.4574	0.373723	-0.427451	30.4437	0.18333	-0.736765	30.4574	0.121851	-0.91417	30.4437	0.469449	-0.328411	30.4574	0.200466	-0.69796
Sample	Sample Chondrogenic	Chimpanzee	Chimpanzee Chondrogenic	C5	C5 Chondrogenic	C40280	C40280 Chondrogenic	C40280 Chondrogenic - ALB	Chondrogenic	ALB	3	C5C2	study-collection-qPCR-C5 - plate1	2020-09-30	Emilie Briscoe	31.6333	2.09758	30.4437	2.0898	0.320104	30.4574	0.531258	-0.274694	30.4437	0.356929	-0.447418	30.4574	0.237234	-0.624822	30.4437	0.793183	-0.100627	30.4574	0.338708	-0.470175
Sample	Sample Osteogenic	Chimpanzee	Chimpanzee Osteogenic	C5	C5 Osteogenic	C40280	C40280 Osteogenic	C40280 Osteogenic - ALB	Osteogenic	ALB	1	C5O2	study-collection-qPCR-C5 - plate1	2020-09-30	Emilie Briscoe	31.2585	2.09758	30.4437	49.7738	1.697	30.4574	12.6533	1.1022	30.4437	5.4608	0.737256	30.4574	3.62954	0.559851	30.4437	15.4378	1.18858	30.4574	6.59228	0.819036
Sample	Sample Osteogenic	Chimpanzee	Chimpanzee Osteogenic	C5	C5 Osteogenic	C40280	C40280 Osteogenic	C40280 Osteogenic - ALB	Osteogenic	ALB	2	C5O2	study-collection-qPCR-C5 - plate1	2020-09-30	Emilie Briscoe	31.54	2.09758	30.4437	30.093	1.47847	30.4574	7.65011	0.883668	30.4437	3.76023	0.575214	30.4574	2.49925	0.39781	30.4437	9.99469	0.999769	30.4574	4.26796	0.630221
Sample	Sample Osteogenic	Chimpanzee	Chimpanzee Osteogenic	C5	C5 Osteogenic	C40280	C40280 Osteogenic	C40280 Osteogenic - ALB	Osteogenic	ALB	3	C5O2	study-collection-qPCR-C5 - plate1	2020-09-30	Emilie Briscoe	31.4652	2.09758	30.4437	31.4092	1.49706	30.4574	7.9847	0.902259	30.4437	4.22268	0.625588	30.4574	2.80662	0.448183	30.4437	10.8685	1.03617	30.4574	4.6411	0.666621
Sample	Sample iPSC	Chimpanzee	Chimpanzee iPSC	C6	C6 iPSC	C3624	C3624 iPSC	C3624 iPSC - ALB	iPSC	ALB	1	C6I2	study-collection-qPCR-C6 - plate1	2020-10-16	Emilie Briscoe	32.3863	2.03017	31.2376	1.70269	0.231134	35.7614	12.594	1.10016	31.2376	0.642435	-0.192171	35.7614	9.80202	0.991316	31.2376	1.03465	0.0147919	35.7614	11.0781	1.04447
Sample	Sample iPSC	Chimpanzee	Chimpanzee iPSC	C6	C6 iPSC	C3624	C3624 iPSC	C3624 iPSC - ALB	iPSC	ALB	2	C6I2	study-collection-qPCR-C6 - plate1	2020-10-16	Emilie Briscoe	30.9062	2.03017	31.2376	0.767811	-0.114746	35.7614	5.67914	0.754282	31.2376	1.07485	0.0313496	35.7614	16.3997	1.21484	31.2376	0.91182	-0.0400908	35.7614	9.76302	0.989584
Sample	Sample iPSC	Chimpanzee	Chimpanzee iPSC	C6	C6 iPSC	C3624	C3624 iPSC	C3624 iPSC - ALB	iPSC	ALB	3	C6I2	study-collection-qPCR-C6 - plate1	2020-10-16	Emilie Briscoe	30.4202	2.03017	31.2376	0.764912	-0.116389	35.7614	5.65769	0.752639	31.2376	1.44818	0.160822	35.7614	22.0957	1.34431	31.2376	1.05998	0.0252989	35.7614	11.3494	1.05497
Sample	Sample MSC	Chimpanzee	Chimpanzee MSC	C6	C6 MSC	C3624	C3624 MSC	C3624 MSC - ALB	MSC	ALB	1	C6M2	study-collection-qPCR-C6 - plate1	2020-10-16	Emilie Briscoe	36.7997	2.03017	31.2376	0.176869	-0.752348	35.7614	1.30822	0.11668	31.2376	0.0542794	-1.26537	35.7614	0.828174	-0.0818783	31.2376	0.0967494	-1.01435	35.7614	1.03591	0.0153232
Sample	Sample MSC	Chimpanzee	Chimpanzee MSC	C6	C6 MSC	C3624	C3624 MSC	C3624 MSC - ALB	MSC	ALB	2	C6M2	study-collection-qPCR-C6 - plate1	2020-10-16	Emilie Briscoe	35.549	2.03017	31.2376	0.10529	-0.977613	35.7614	0.778781	-0.108585	31.2376	0.0642561	-1.19209	35.7614	0.980395	-0.00859907	31.2376	0.0818114	-1.08719	35.7614	0.875969	-0.0575112
Sample	Sample MSC	Chimpanzee	Chimpanzee MSC	C6	C6 MSC	C3624	C3624 MSC	C3624 MSC - ALB	MSC	ALB	3	C6M2	study-collection-qPCR-C6 - plate1	2020-10-16	Emilie Briscoe	34.9354	2.03017	31.2376	0.132702	-0.877123	35.7614	0.981533	-0.00809526	31.2376	0.0807217	-1.09301	35.7614	1.23162	0.0904773	31.2376	0.102923	-0.987487	35.7614	1.10202	0.042188
Sample	Sample Adipogenic	Chimpanzee	Chimpanzee Adipogenic	C6	C6 Adipogenic	C3624	C3624 Adipogenic	C3624 Adipogenic - ALB	Adipogenic	ALB	1	C6A1	study-collection-qPCR-C6 - plate1	2020-10-16	Emilie Briscoe	32.9388	2.03017	31.2376	0.434806	-0.361704	35.7614	3.21606	0.507324	31.2376	0.302601	-0.51913	35.7614	4.61697	0.664357	31.2376	0.361241	-0.442203	35.7614	3.86787	0.587472
Sample	Sample Adipogenic	Chimpanzee	Chimpanzee Adipogenic	C6	C6 Adipogenic	C3624	C3624 Adipogenic	C3624 Adipogenic - ALB	Adipogenic	ALB	2	C6A1	study-collection-qPCR-C6 - plate1	2020-10-16	Emilie Briscoe	31.8682	2.03017	31.2376	0.339022	-0.469772	35.7614	2.50759	0.399256	31.2376	0.281391	-0.55069	35.7614	4.29336	0.632797	31.2376	0.308021	-0.51142	35.7614	3.29803	0.518255
Sample	Sample Adipogenic	Chimpanzee	Chimpanzee Adipogenic	C6	C6 Adipogenic	C3624	C3624 Adipogenic	C3624 Adipogenic - ALB	Adipogenic	ALB	3	C6A1	study-collection-qPCR-C6 - plate1	2020-10-16	Emilie Briscoe	31.2482	2.03017	31.2376	0.2856	-0.544241	35.7614	2.11245	0.324787	31.2376	0.480258	-0.318526	35.7614	7.32759	0.864961	31.2376	0.372344	-0.429056	35.7614	3.98675	0.600619
Sample	Sample Osteogenic	Chimpanzee	Chimpanzee Osteogenic	C6	C6 Osteogenic	C3624	C3624 Osteogenic	C3624 Osteogenic - ALB	Osteogenic	ALB	1	C6O2	study-collection-qPCR-C6 - plate1	2020-10-16	Emilie Briscoe	36.8724	2.03017	31.2376	0.261284	-0.582887	35.7614	1.9326	0.286141	31.2376	0.320327	-0.494406	35.7614	4.88743	0.689081	31.2376	0.290599	-0.536706	35.7614	3.11149	0.492969
Sample	Sample Osteogenic	Chimpanzee	Chimpanzee Osteogenic	C6	C6 Osteogenic	C3624	C3624 Osteogenic	C3624 Osteogenic - ALB	Osteogenic	ALB	2	C6O2	study-collection-qPCR-C6 - plate1	2020-10-16	Emilie Briscoe	36.6547	2.03017	31.2376	0.0639124	-1.19441	35.7614	0.47273	-0.325387	31.2376	0.0524831	-1.27998	35.7614	0.800767	-0.0964936	31.2376	0.0578257	-1.23788	35.7614	0.61915	-0.208204
Sample	Sample Osteogenic	Chimpanzee	Chimpanzee Osteogenic	C6	C6 Osteogenic	C3624	C3624 Osteogenic	C3624 Osteogenic - ALB	Osteogenic	ALB	3	C6O2	study-collection-qPCR-C6 - plate1	2020-10-16	Emilie Briscoe	35.4788	2.03017	31.2376	0.0711945	-1.14755	35.7614	0.526592	-0.278525	31.2376	0.0782208	-1.10668	35.7614	1.19346	0.0768092	31.2376	0.0747305	-1.1265	35.7614	0.800153	-0.0968269
Sample	Sample iPSC	Human	Human iPSC	H1-r2	H1-r2 iPSC	H23555	H23555 iPSC	H23555 iPSC - BGLAP	iPSC	BGLAP		H1Ir2	study-collection-qPCR-H1r - plate2	2020-10-28	Emilie Briscoe	31.4192	1.85351	30.8416	1.05312	0.0224773	31.8984	3.14542	0.497679	30.8416	1.79595	0.254295	31.8984	1.9315	0.285894	30.8416	1.40254	0.146914	31.8984	2.43551	0.38659
Sample	Sample iPSC	Human	Human iPSC	H1-r2	H1-r2 iPSC	H23555	H23555 iPSC	H23555 iPSC - BGLAP	iPSC	BGLAP		H1Ir2	study-collection-qPCR-H1r - plate2	2020-10-28	Emilie Briscoe	30.9972	1.85351	30.8416	0.884425	-0.0533388	31.8984	2.64158	0.421863	30.8416	0.761854	-0.118128	31.8984	0.819352	-0.0865296	30.8416	0.81671	-0.0879319	31.8984	1.41822	0.151744
Sample	Sample iPSC	Human	Human iPSC	H1-r2	H1-r2 iPSC	H23555	H23555 iPSC	H23555 iPSC - BGLAP	iPSC	BGLAP		H1Ir2	study-collection-qPCR-H1r - plate2	2020-10-28	Emilie Briscoe	30.1084	1.85351	30.8416	1.07365	0.0308615	31.8984	3.20674	0.506064	30.8416	0.730859	-0.136166	31.8984	0.786018	-0.104568	30.8416	0.873007	-0.0589823	31.8984	1.51598	0.180693
Sample	Sample MSC	Human	Human MSC	H1-r2	H1-r2 MSC	H23555	H23555 MSC	H23555 MSC - BGLAP	MSC	BGLAP		H1Mr2	study-collection-qPCR-H1r - plate2	2020-10-28	Emilie Briscoe	32.8732	1.85351	30.8416	0.419251	-0.377526	31.8984	1.25221	0.0976758	30.8416	0.672801	-0.172114	31.8984	0.723578	-0.140515	30.8416	0.540487	-0.267215	31.8984	0.938557	-0.0275395
Sample	Sample MSC	Human	Human MSC	H1-r2	H1-r2 MSC	H23555	H23555 MSC	H23555 MSC - BGLAP	MSC	BGLAP		H1Mr2	study-collection-qPCR-H1r - plate2	2020-10-28	Emilie Briscoe	30.5902	1.85351	30.8416	0.52435	-0.280378	31.8984	1.56611	0.194824	30.8416	1.51385	0.180081	31.8984	1.6281	0.21168	30.8416	0.919121	-0.0366273	31.8984	1.59606	0.203048
Sample	Sample MSC	Human	Human MSC	H1-r2	H1-r2 MSC	H23555	H23555 MSC	H23555 MSC - BGLAP	MSC	BGLAP		H1Mr2	study-collection-qPCR-H1r - plate2	2020-10-28	Emilie Briscoe	32.2319	1.85351	30.8416	0.170726	-0.767701	31.8984	0.509918	-0.292499	30.8416	0.789288	-0.102764	31.8984	0.848857	-0.0711655	30.8416	0.384429	-0.415184	31.8984	0.667561	-0.175509
Sample	Sample Adipogenic	Human	Human Adipogenic	H1-r2	H1-r2 Adipogenic	H23555	H23555 Adipogenic	H23555 Adipogenic - BGLAP	Adipogenic	BGLAP		H1Ar2	study-collection-qPCR-H1r - plate2	2020-10-28	Emilie Briscoe	33.551	1.85351	30.8416	0.290641	-0.536642	31.8984	0.86808	-0.0614404	30.8416	0.714529	-0.14598	31.8984	0.768455	-0.114381	30.8416	0.470464	-0.327473	31.8984	0.816963	-0.0877977
Sample	Sample Adipogenic	Human	Human Adipogenic	H1-r2	H1-r2 Adipogenic	H23555	H23555 Adipogenic	H23555 Adipogenic - BGLAP	Adipogenic	BGLAP		H1Ar2	study-collection-qPCR-H1r - plate2	2020-10-28	Emilie Briscoe	31.3955	1.85351	30.8416	0.236714	-0.625776	31.8984	0.707012	-0.150574	30.8416	1.97585	0.295754	31.8984	2.12497	0.327353	30.8416	0.729654	-0.136883	31.8984	1.26705	0.102793
Sample	Sample Adipogenic	Human	Human Adipogenic	H1-r2	H1-r2 Adipogenic	H23555	H23555 Adipogenic	H23555 Adipogenic - BGLAP	Adipogenic	BGLAP		H1Ar2	study-collection-qPCR-H1r - plate2	2020-10-28	Emilie Briscoe	33.1391	1.85351	30.8416	0.0943762	-1.02514	31.8984	0.28188	-0.549935	30.8416	0.506801	-0.295163	31.8984	0.54505	-0.263564	30.8416	0.230133	-0.638022	31.8984	0.399626	-0.398346
Sample	Sample Chondrogenic	Human	Human Chondrogenic	H1-r2	H1-r2 Chondrogenic	H23555	H23555 Chondrogenic	H23555 Chondrogenic - BGLAP	Chondrogenic	BGLAP		H1Cr2	study-collection-qPCR-H1r - plate2	2020-10-28	Emilie Briscoe	Undetermined	1.85351	30.8416			31.8984			30.8416			31.8984			30.8416			31.8984
Sample	Sample Chondrogenic	Human	Human Chondrogenic	H1-r2	H1-r2 Chondrogenic	H23555	H23555 Chondrogenic	H23555 Chondrogenic - BGLAP	Chondrogenic	BGLAP		H1Cr2	study-collection-qPCR-H1r - plate2	2020-10-28	Emilie Briscoe	Undetermined	1.85351	30.8416			31.8984			30.8416			31.8984			30.8416			31.8984
Sample	Sample Chondrogenic	Human	Human Chondrogenic	H1-r2	H1-r2 Chondrogenic	H23555	H23555 Chondrogenic	H23555 Chondrogenic - BGLAP	Chondrogenic	BGLAP		H1Cr2	study-collection-qPCR-H1r - plate2	2020-10-28	Emilie Briscoe	Undetermined	1.85351	30.8416			31.8984			30.8416			31.8984			30.8416			31.8984
Sample	Sample Osteogenic	Human	Human Osteogenic	H1-r2	H1-r2 Osteogenic	H23555	H23555 Osteogenic	H23555 Osteogenic - BGLAP	Osteogenic	BGLAP		H1Or2	study-collection-qPCR-H1r - plate2	2020-10-28	Emilie Briscoe	29.5408	1.85351	30.8416	4.40201	0.643651	31.8984	13.1478	1.11885	30.8416	11.1091	1.04568	31.8984	11.9475	1.07728	30.8416	7.23425	0.859393	31.8984	12.5623	1.09907
Sample	Sample Osteogenic	Human	Human Osteogenic	H1-r2	H1-r2 Osteogenic	H23555	H23555 Osteogenic	H23555 Osteogenic - BGLAP	Osteogenic	BGLAP		H1Or2	study-collection-qPCR-H1r - plate2	2020-10-28	Emilie Briscoe	27.7049	1.85351	30.8416	11.4425	1.05852	31.8984	34.1762	1.53372	30.8416	15.0345	1.17709	31.8984	16.1692	1.20869	30.8416	13.2675	1.12279	31.8984	23.0391	1.36246
Sample	Sample Osteogenic	Human	Human Osteogenic	H1-r2	H1-r2 Osteogenic	H23555	H23555 Osteogenic	H23555 Osteogenic - BGLAP	Osteogenic	BGLAP		H1Or2	study-collection-qPCR-H1r - plate2	2020-10-28	Emilie Briscoe	27.7366	1.85351	30.8416	7.96448	0.901158	31.8984	23.7881	1.37636	30.8416	13.5397	1.13161	31.8984	14.5615	1.16321	30.8416	10.5764	1.02434	31.8984	18.3659	1.26401
Sample	Sample iPSC	Human	Human iPSC	H2	H2 iPSC	H20157	H20157 iPSC	H20157 iPSC - BGLAP	iPSC	BGLAP	1	H2I2	study-collection-qPCR-H2 - plate2	2020-07-30	Emilie Briscoe	30.7127	1.80467	30.1749	1.18746	0.0746188	32.3863	5.95579	0.77494	30.1749	1.97117	0.294724	32.3863	8.89461	0.949127	30.1749	1.55202	0.190898	32.3863	7.37052	0.867498
Sample	Sample iPSC	Human	Human iPSC	H2	H2 iPSC	H20157	H20157 iPSC	H20157 iPSC - BGLAP	iPSC	BGLAP	2	H2I2	study-collection-qPCR-H2 - plate2	2020-07-30	Emilie Briscoe	30.2051	1.80467	30.1749	0.715795	-0.145211	32.3863	3.59013	0.55511	30.1749	0.484148	-0.315022	32.3863	2.18465	0.339381	30.1749	0.582317	-0.23484	32.3863	2.76541	0.44176
Sample	Sample iPSC	Human	Human iPSC	H2	H2 iPSC	H20157	H20157 iPSC	H20157 iPSC - BGLAP	iPSC	BGLAP	3	H2I2	study-collection-qPCR-H2 - plate2	2020-07-30	Emilie Briscoe	29.6068	1.80467	30.1749	1.1765	0.0705924	32.3863	5.90083	0.770913	30.1749	1.04785	0.0202982	32.3863	4.72826	0.674701	30.1749	1.10648	0.0439423	32.3863	5.25463	0.720543
Sample	Sample MSC	Human	Human MSC	H2	H2 MSC	H20157	H20157 MSC	H20157 MSC - BGLAP	MSC	BGLAP	1	H2M2	study-collection-qPCR-H2 - plate2	2020-07-30	Emilie Briscoe	32.5712	1.80467	30.1749	0.182865	-0.737869	32.3863	0.917175	-0.0375479	30.1749	0.300276	-0.522479	32.3863	1.35495	0.131924	30.1749	0.237092	-0.625083	32.3863	1.12595	0.0515174
Sample	Sample MSC	Human	Human MSC	H2	H2 MSC	H20157	H20157 MSC	H20157 MSC - BGLAP	MSC	BGLAP	2	H2M2	study-collection-qPCR-H2 - plate2	2020-07-30	Emilie Briscoe	32.6283	1.80467	30.1749	0.166301	-0.779105	32.3863	0.834096	-0.0787841	30.1749	0.177768	-0.750145	32.3863	0.802154	-0.0957421	30.1749	0.17205	-0.764344	32.3863	0.817064	-0.0877439
Sample	Sample MSC	Human	Human MSC	H2	H2 MSC	H20157	H20157 MSC	H20157 MSC - BGLAP	MSC	BGLAP	3	H2M2	study-collection-qPCR-H2 - plate2	2020-07-30	Emilie Briscoe	31.9593	1.80467	30.1749	0.260622	-0.583989	32.3863	1.30717	0.116332	30.1749	0.203899	-0.690585	32.3863	0.920064	-0.0361819	30.1749	0.22889	-0.640374	32.3863	1.08699	0.0362265
Sample	Sample Adipogenic	Human	Human Adipogenic	H2	H2 Adipogenic	H20157	H20157 Adipogenic	H20157 Adipogenic - BGLAP	Adipogenic	BGLAP	1	H2A2	study-collection-qPCR-H2 - plate2	2020-07-30	Emilie Briscoe	33.9716	1.80467	30.1749	0.138871	-0.857388	32.3863	0.69652	-0.157067	30.1749	0.15658	-0.805264	32.3863	0.706544	-0.150861	30.1749	0.148029	-0.829652	32.3863	0.702988	-0.153052
Sample	Sample Adipogenic	Human	Human Adipogenic	H2	H2 Adipogenic	H20157	H20157 Adipogenic	H20157 Adipogenic - BGLAP	Adipogenic	BGLAP	2	H2A2	study-collection-qPCR-H2 - plate2	2020-07-30	Emilie Briscoe	32.4077	1.80467	30.1749	0.295491	-0.529456	32.3863	1.48206	0.170865	30.1749	0.5434	-0.264881	32.3863	2.45201	0.389523	30.1749	0.407075	-0.390326	32.3863	1.93319	0.286274
Sample	Sample Adipogenic	Human	Human Adipogenic	H2	H2 Adipogenic	H20157	H20157 Adipogenic	H20157 Adipogenic - BGLAP	Adipogenic	BGLAP	3	H2A2	study-collection-qPCR-H2 - plate2	2020-07-30	Emilie Briscoe	Undetermined	1.80467	30.1749			32.3863			30.1749			32.3863			30.1749			32.3863
Sample	Sample Chondrogenic	Human	Human Chondrogenic	H2	H2 Chondrogenic	H20157	H20157 Chondrogenic	H20157 Chondrogenic - BGLAP	Chondrogenic	BGLAP	1	H2C2	study-collection-qPCR-H2 - plate2	2020-07-30	Emilie Briscoe	Undetermined	1.80467	30.1749			32.3863			30.1749			32.3863			30.1749			32.3863
Sample	Sample Chondrogenic	Human	Human Chondrogenic	H2	H2 Chondrogenic	H20157	H20157 Chondrogenic	H20157 Chondrogenic - BGLAP	Chondrogenic	BGLAP	2	H2C2	study-collection-qPCR-H2 - plate2	2020-07-30	Emilie Briscoe	Undetermined	1.80467	30.1749			32.3863			30.1749			32.3863			30.1749			32.3863
Sample	Sample Chondrogenic	Human	Human Chondrogenic	H2	H2 Chondrogenic	H20157	H20157 Chondrogenic	H20157 Chondrogenic - BGLAP	Chondrogenic	BGLAP	3	H2C2	study-collection-qPCR-H2 - plate2	2020-07-30	Emilie Briscoe	Undetermined	1.80467	30.1749			32.3863			30.1749			32.3863			30.1749			32.3863
Sample	Sample Osteogenic	Human	Human Osteogenic	H2	H2 Osteogenic	H20157	H20157 Osteogenic	H20157 Osteogenic - BGLAP	Osteogenic	BGLAP	1	H2O2	study-collection-qPCR-H2 - plate2	2020-07-30	Emilie Briscoe	25.3431	1.80467	30.1749	95.8174	1.98144	32.3863	480.579	2.68177	30.1749	26.2567	1.41924	32.3863	118.479	2.07364	30.1749	48.7893	1.68832	32.3863	231.699	2.36492
Sample	Sample Osteogenic	Human	Human Osteogenic	H2	H2 Osteogenic	H20157	H20157 Osteogenic	H20157 Osteogenic - BGLAP	Osteogenic	BGLAP	2	H2O2	study-collection-qPCR-H2 - plate2	2020-07-30	Emilie Briscoe	24.9162	1.80467	30.1749	43.5343	1.63883	32.3863	218.35	2.33915	30.1749	16.8074	1.2255	32.3863	75.8409	1.8799	30.1749	26.4581	1.42256	32.3863	125.649	2.09916
Sample	Sample Osteogenic	Human	Human Osteogenic	H2	H2 Osteogenic	H20157	H20157 Osteogenic	H20157 Osteogenic - BGLAP	Osteogenic	BGLAP	3	H2O2	study-collection-qPCR-H2 - plate2	2020-07-30	Emilie Briscoe	24.4449	1.80467	30.1749	58.7381	1.76892	32.3863	294.605	2.46924	30.1749	25.6761	1.40953	32.3863	115.86	2.06393	30.1749	38.1077	1.58101	32.3863	180.973	2.25761
Sample	Sample iPSC	Human	Human iPSC	H3	H3 iPSC	H28126	H28126 iPSC	H28126 iPSC - BGLAP	iPSC	BGLAP	1	H3I2	study-collection-qPCR-H3 - plate2	2020-08-28	Emilie Briscoe	30.0014	2.07992	29.8797	0.981353	-0.00817468	30.6516	1.66177	0.22057	29.8797	1.04466	0.0189732	30.6516	1.52265	0.182599	29.8797	1.01514	0.00652708	30.6516	1.58609	0.200327
Sample	Sample iPSC	Human	Human iPSC	H3	H3 iPSC	H28126	H28126 iPSC	H28126 iPSC - BGLAP	iPSC	BGLAP	2	H3I2	study-collection-qPCR-H3 - plate2	2020-08-28	Emilie Briscoe	30.3282	2.07992	29.8797	0.704518	-0.152108	30.6516	1.19299	0.0766374	29.8797	0.817054	-0.0877495	30.6516	1.1909	0.0758765	29.8797	0.762574	-0.117718	30.6516	1.19147	0.0760819
Sample	Sample iPSC	Human	Human iPSC	H3	H3 iPSC	H28126	H28126 iPSC	H28126 iPSC - BGLAP	iPSC	BGLAP	3	H3I2	study-collection-qPCR-H3 - plate2	2020-08-28	Emilie Briscoe	29.3094	2.07992	29.8797	1.44638	0.160282	30.6516	2.44922	0.389028	29.8797	1.17159	0.0687762	30.6516	1.70766	0.232402	29.8797	1.29179	0.111191	30.6516	2.01832	0.304991
Sample	Sample MSC	Human	Human MSC	H3	H3 MSC	H28126	H28126 MSC	H28126 MSC - BGLAP	MSC	BGLAP	1	H3M1	study-collection-qPCR-H3 - plate2	2020-08-28	Emilie Briscoe	31.2939	2.07992	29.8797	0.573895	-0.241168	30.6516	0.971801	-0.0124225	29.8797	0.706468	-0.150907	30.6516	1.02972	0.0127187	29.8797	0.643159	-0.191682	30.6516	1.00489	0.00211797
Sample	Sample MSC	Human	Human MSC	H3	H3 MSC	H28126	H28126 MSC	H28126 MSC - BGLAP	MSC	BGLAP	2	H3M1	study-collection-qPCR-H3 - plate2	2020-08-28	Emilie Briscoe	30.794	2.07992	29.8797	0.5147	-0.288446	30.6516	0.871563	-0.059701	29.8797	0.532387	-0.273773	30.6516	0.775984	-0.110147	29.8797	0.524107	-0.28058	30.6516	0.818879	-0.0867801
Sample	Sample MSC	Human	Human MSC	H3	H3 MSC	H28126	H28126 MSC	H28126 MSC - BGLAP	MSC	BGLAP	3	H3M1	study-collection-qPCR-H3 - plate2	2020-08-28	Emilie Briscoe	29.8668	2.07992	29.8797	0.697234	-0.156622	30.6516	1.18066	0.0721235	29.8797	0.858623	-0.0661977	30.6516	1.25149	0.0974283	29.8797	0.77779	-0.109138	30.6516	1.21524	0.0846621
Sample	Sample Adipogenic	Human	Human Adipogenic	H3	H3 Adipogenic	H28126	H28126 Adipogenic	H28126 Adipogenic - BGLAP	Adipogenic	BGLAP	1	H3A1	study-collection-qPCR-H3 - plate2	2020-08-28	Emilie Briscoe	33.9071	2.07992	29.8797	0.09997	-1.00013	30.6516	0.169284	-0.771385	29.8797	0.292258	-0.534234	30.6516	0.425983	-0.370608	29.8797	0.178154	-0.749204	30.6516	0.278353	-0.555404
Sample	Sample Adipogenic	Human	Human Adipogenic	H3	H3 Adipogenic	H28126	H28126 Adipogenic	H28126 Adipogenic - BGLAP	Adipogenic	BGLAP	2	H3A1	study-collection-qPCR-H3 - plate2	2020-08-28	Emilie Briscoe	32.7406	2.07992	29.8797	0.139003	-0.856975	30.6516	0.235381	-0.628229	29.8797	0.232352	-0.633853	30.6516	0.338667	-0.470227	29.8797	0.18312	-0.737265	30.6516	0.286111	-0.543465
Sample	Sample Adipogenic	Human	Human Adipogenic	H3	H3 Adipogenic	H28126	H28126 Adipogenic	H28126 Adipogenic - BGLAP	Adipogenic	BGLAP	3	H3A1	study-collection-qPCR-H3 - plate2	2020-08-28	Emilie Briscoe	32.1729	2.07992	29.8797	0.176745	-0.752653	30.6516	0.29929	-0.523908	29.8797	0.337582	-0.47162	30.6516	0.492046	-0.307994	29.8797	0.249815	-0.602382	30.6516	0.390317	-0.408582
Sample	Sample Osteogenic	Human	Human Osteogenic	H3	H3 Osteogenic	H28126	H28126 Osteogenic	H28126 Osteogenic - BGLAP	Osteogenic	BGLAP	1	H3O2	study-collection-qPCR-H3 - plate2	2020-08-28	Emilie Briscoe	31.9227	2.07992	29.8797	0.28338	-0.547631	30.6516	0.47986	-0.318886	29.8797	0.389971	-0.408968	30.6516	0.568405	-0.245342	29.8797	0.336633	-0.472844	30.6516	0.525964	-0.279044
Sample	Sample Osteogenic	Human	Human Osteogenic	H3	H3 Osteogenic	H28126	H28126 Osteogenic	H28126 Osteogenic - BGLAP	Osteogenic	BGLAP	2	H3O2	study-collection-qPCR-H3 - plate2	2020-08-28	Emilie Briscoe	29.8317	2.07992	29.8797	0.636085	-0.196485	30.6516	1.07711	0.0322603	29.8797	0.856606	-0.0672186	30.6516	1.24855	0.0964073	29.8797	0.743872	-0.128502	30.6516	1.16225	0.0652978
Sample	Sample Osteogenic	Human	Human Osteogenic	H3	H3 Osteogenic	H28126	H28126 Osteogenic	H28126 Osteogenic - BGLAP	Osteogenic	BGLAP	3	H3O2	study-collection-qPCR-H3 - plate2	2020-08-28	Emilie Briscoe	30.0561	2.07992	29.8797	0.444279	-0.352344	30.6516	0.752317	-0.123599	29.8797	0.674978	-0.17071	30.6516	0.98382	-0.00708432	29.8797	0.553588	-0.256813	30.6516	0.864941	-0.0630133
Sample	Sample iPSC	Human	Human iPSC	H4	H4 iPSC	H28834	H28834 iPSC	H28834 iPSC - BGLAP	iPSC	BGLAP	1	H4I2	study-collection-qPCR-H4 - plate2	2020-09-15	Emilie Briscoe	31.3325	1.96678	30.3811	0.571172	-0.243233	31.6948	1.12695	0.0519061	30.3811	0.819717	-0.0863359	31.6948	0.579145	-0.237213	30.3811	0.697239	-0.156618	31.6948	0.780596	-0.107574
Sample	Sample iPSC	Human	Human iPSC	H4	H4 iPSC	H28834	H28834 iPSC	H28834 iPSC - BGLAP	iPSC	BGLAP	2	H4I2	study-collection-qPCR-H4 - plate2	2020-09-15	Emilie Briscoe	29.9092	1.96678	30.3811	1.08401	0.0350333	31.6948	2.13881	0.330172	30.3811	1.0791	0.0330635	31.6948	0.762407	-0.117813	30.3811	1.07862	0.0328692	31.6948	1.20757	0.0819138
Sample	Sample iPSC	Human	Human iPSC	H4	H4 iPSC	H28834	H28834 iPSC	H28834 iPSC - BGLAP	iPSC	BGLAP	3	H4I2	study-collection-qPCR-H4 - plate2	2020-09-15	Emilie Briscoe	29.9016	1.96678	30.3811	1.6151	0.2082	31.6948	3.18668	0.503338	30.3811	1.1305	0.0532725	31.6948	0.798722	-0.0976043	30.3811	1.32969	0.123749	31.6948	1.48865	0.172794
Sample	Sample MSC	Human	Human MSC	H4	H4 MSC	H28834	H28834 MSC	H28834 MSC - BGLAP	MSC	BGLAP	1	H4M2	study-collection-qPCR-H4 - plate2	2020-09-15	Emilie Briscoe	31.5083	1.96678	30.3811	0.691151	-0.160427	31.6948	1.36368	0.134712	30.3811	3.34617	0.524548	31.6948	2.36413	0.373671	30.3811	1.65136	0.217843	31.6948	1.84879	0.266887
Sample	Sample MSC	Human	Human MSC	H4	H4 MSC	H28834	H28834 MSC	H28834 MSC - BGLAP	MSC	BGLAP	2	H4M2	study-collection-qPCR-H4 - plate2	2020-09-15	Emilie Briscoe	31.7934	1.96678	30.3811	0.429418	-0.36712	31.6948	0.847265	-0.0719808	30.3811	0.829432	-0.0812192	31.6948	0.586009	-0.232096	30.3811	0.617334	-0.20948	31.6948	0.691138	-0.160435
Sample	Sample MSC	Human	Human MSC	H4	H4 MSC	H28834	H28834 MSC	H28834 MSC - BGLAP	MSC	BGLAP	3	H4M2	study-collection-qPCR-H4 - plate2	2020-09-15	Emilie Briscoe	31.7827	1.96678	30.3811	0.438662	-0.35787	31.6948	0.865504	-0.0627311	30.3811	1.02165	0.00930131	31.6948	0.721813	-0.141575	30.3811	0.699042	-0.155497	31.6948	0.782614	-0.106452
Sample	Sample Adipogenic	Human	Human Adipogenic	H4	H4 Adipogenic	H28834	H28834 Adipogenic	H28834 Adipogenic - BGLAP	Adipogenic	BGLAP	1	H4A2	study-collection-qPCR-H4 - plate2	2020-09-15	Emilie Briscoe	33.4485	1.96678	30.3811	0.497363	-0.303327	31.6948	0.981323	-0.00818792	30.3811	0.411111	-0.386041	31.6948	0.290457	-0.536918	30.3811	0.454412	-0.34255	31.6948	0.508739	-0.293505
Sample	Sample Adipogenic	Human	Human Adipogenic	H4	H4 Adipogenic	H28834	H28834 Adipogenic	H28834 Adipogenic - BGLAP	Adipogenic	BGLAP	2	H4A2	study-collection-qPCR-H4 - plate2	2020-09-15	Emilie Briscoe	33.2648	1.96678	30.3811	0.204411	-0.689495	31.6948	0.403314	-0.394356	30.3811	0.35965	-0.44412	31.6948	0.254099	-0.594997	30.3811	0.279909	-0.552983	31.6948	0.313373	-0.503938
Sample	Sample Adipogenic	Human	Human Adipogenic	H4	H4 Adipogenic	H28834	H28834 Adipogenic	H28834 Adipogenic - BGLAP	Adipogenic	BGLAP	3	H4A2	study-collection-qPCR-H4 - plate2	2020-09-15	Emilie Briscoe	32.4886	1.96678	30.3811	0.36691	-0.43544	31.6948	0.723934	-0.140301	30.3811	0.711037	-0.148108	31.6948	0.50236	-0.298985	30.3811	0.530158	-0.275595	31.6948	0.59354	-0.22655
Sample	Sample Chondrogenic	Human	Human Chondrogenic	H4	H4 Chondrogenic	H28834	H28834 Chondrogenic	H28834 Chondrogenic - BGLAP	Chondrogenic	BGLAP	1	H4C2	study-collection-qPCR-H4 - plate2	2020-09-15	Emilie Briscoe	32.6636	1.96678	30.3811	2.33458	0.368208	31.6948	4.60625	0.663347	30.3811	1.44808	0.160791	31.6948	1.02309	0.00991453	30.3811	1.84097	0.265047	31.6948	2.06106	0.314091
Sample	Sample Chondrogenic	Human	Human Chondrogenic	H4	H4 Chondrogenic	H28834	H28834 Chondrogenic	H28834 Chondrogenic - BGLAP	Chondrogenic	BGLAP	2	H4C2	study-collection-qPCR-H4 - plate2	2020-09-15	Emilie Briscoe	32.5321	1.96678	30.3811	1.11505	0.0472957	31.6948	2.20006	0.342435	30.3811	1.31423	0.118673	31.6948	0.92853	-0.0322042	30.3811	1.24056	0.0936166	31.6948	1.38887	0.142661
Sample	Sample Chondrogenic	Human	Human Chondrogenic	H4	H4 Chondrogenic	H28834	H28834 Chondrogenic	H28834 Chondrogenic - BGLAP	Chondrogenic	BGLAP	3	H4C2	study-collection-qPCR-H4 - plate2	2020-09-15	Emilie Briscoe	32.3548	1.96678	30.3811	0.978866	-0.0092767	31.6948	1.93136	0.285862	30.3811	1.47813	0.169712	31.6948	1.04432	0.0188353	30.3811	1.24468	0.0950574	31.6948	1.39348	0.144102
Sample	Sample Osteogenic	Human	Human Osteogenic	H4	H4 Osteogenic	H28834	H28834 Osteogenic	H28834 Osteogenic - BGLAP	Osteogenic	BGLAP	1	H4O2	study-collection-qPCR-H4 - plate2	2020-09-15	Emilie Briscoe	28.8211	1.96678	30.3811	12.2696	1.08883	31.6948	24.2087	1.38397	30.3811	14.087	1.14882	31.6948	9.95274	0.997943	30.3811	13.4396	1.12839	31.6948	15.0463	1.17743
Sample	Sample Osteogenic	Human	Human Osteogenic	H4	H4 Osteogenic	H28834	H28834 Osteogenic	H28834 Osteogenic - BGLAP	Osteogenic	BGLAP	2	H4O2	study-collection-qPCR-H4 - plate2	2020-09-15	Emilie Briscoe	28.3535	1.96678	30.3811	12.4268	1.09436	31.6948	24.5187	1.3895	30.3811	5.54733	0.744084	31.6948	3.91929	0.593207	30.3811	8.07311	0.907041	31.6948	9.03828	0.956086
Sample	Sample Osteogenic	Human	Human Osteogenic	H4	H4 Osteogenic	H28834	H28834 Osteogenic	H28834 Osteogenic - BGLAP	Osteogenic	BGLAP	3	H4O2	study-collection-qPCR-H4 - plate2	2020-09-15	Emilie Briscoe	28.6773	1.96678	30.3811	11.4413	1.05848	31.6948	22.5743	1.35361	30.3811	5.5776	0.746447	31.6948	3.94067	0.59557	30.3811	7.81264	0.892798	31.6948	8.74666	0.941842
Sample	Sample iPSC	Human	Human iPSC	H5	H5 iPSC	H21792	H21792 iPSC	H21792 iPSC - BGLAP	iPSC	BGLAP	1	H5I2	study-collection-qPCR-H5 - plate2	2020-09-29	Emilie Briscoe	31.3087	2.01179	30.4559	1.02525	0.0108295	32.7519	6.85681	0.836122	30.4559	0.612107	-0.213173	32.7519	1.30938	0.117067	30.4559	0.781357	-0.107151	32.7519	2.85162	0.455091
Sample	Sample iPSC	Human	Human iPSC	H5	H5 iPSC	H21792	H21792 iPSC	H21792 iPSC - BGLAP	iPSC	BGLAP	2	H5I2	study-collection-qPCR-H5 - plate2	2020-09-29	Emilie Briscoe	30.0539	2.01179	30.4559	1.1978	0.0783854	32.7519	8.01084	0.903678	30.4559	1.96927	0.294305	32.7519	4.21255	0.624545	30.4559	1.56019	0.193177	32.7519	5.69402	0.755419
Sample	Sample iPSC	Human	Human iPSC	H5	H5 iPSC	H21792	H21792 iPSC	H21792 iPSC - BGLAP	iPSC	BGLAP	3	H5I2	study-collection-qPCR-H5 - plate2	2020-09-29	Emilie Briscoe	30.0052	2.01179	30.4559	0.814301	-0.0892149	32.7519	5.446	0.736078	30.4559	0.829598	-0.0811323	32.7519	1.77463	0.249107	30.4559	0.820302	-0.0860263	32.7519	2.99375	0.476215
Sample	Sample MSC	Human	Human MSC	H5	H5 MSC	H21792	H21792 MSC	H21792 MSC - BGLAP	MSC	BGLAP	1	H5M2	study-collection-qPCR-H5 - plate2	2020-09-29	Emilie Briscoe	33.0971	2.01179	30.4559	0.285298	-0.544702	32.7519	1.90805	0.28059	30.4559	0.569725	-0.244335	32.7519	1.21872	0.0859047	30.4559	0.413576	-0.383445	32.7519	1.50937	0.178797
Sample	Sample MSC	Human	Human MSC	H5	H5 MSC	H21792	H21792 MSC	H21792 MSC - BGLAP	MSC	BGLAP	2	H5M2	study-collection-qPCR-H5 - plate2	2020-09-29	Emilie Briscoe	33.0148	2.01179	30.4559	0.092678	-1.03302	32.7519	0.619825	-0.207731	30.4559	0.38928	-0.409738	32.7519	0.832726	-0.0794981	30.4559	0.198471	-0.702303	32.7519	0.724334	-0.140061
Sample	Sample MSC	Human	Human MSC	H5	H5 MSC	H21792	H21792 MSC	H21792 MSC - BGLAP	MSC	BGLAP	3	H5M2	study-collection-qPCR-H5 - plate2	2020-09-29	Emilie Briscoe	32.1437	2.01179	30.4559	0.126429	-0.898152	32.7519	0.845553	-0.0728593	30.4559	0.460632	-0.336646	32.7519	0.985357	-0.00640658	30.4559	0.250624	-0.600978	32.7519	0.914669	-0.0387359
Sample	Sample Osteogenic	Human	Human Osteogenic	H5	H5 Osteogenic	H21792	H21792 Osteogenic	H21792 Osteogenic - BGLAP	Osteogenic	BGLAP	1	H5O2	study-collection-qPCR-H5 - plate2	2020-09-29	Emilie Briscoe	30.2167	2.01179	30.4559	7.72491	0.887894	32.7519	51.6638	1.71319	30.4559	8.54808	0.931869	32.7519	18.2856	1.26211	30.4559	8.22893	0.915343	32.7519	30.0321	1.47759
Sample	Sample Osteogenic	Human	Human Osteogenic	H5	H5 Osteogenic	H21792	H21792 Osteogenic	H21792 Osteogenic - BGLAP	Osteogenic	BGLAP	2	H5O2	study-collection-qPCR-H5 - plate2	2020-09-29	Emilie Briscoe	29.8862	2.01179	30.4559	5.15557	0.712277	32.7519	34.4802	1.53757	30.4559	6.67024	0.824142	32.7519	14.2686	1.15438	30.4559	5.9501	0.774524	32.7519	21.7153	1.33677
Sample	Sample Osteogenic	Human	Human Osteogenic	H5	H5 Osteogenic	H21792	H21792 Osteogenic	H21792 Osteogenic - BGLAP	Osteogenic	BGLAP	3	H5O2	study-collection-qPCR-H5 - plate2	2020-09-29	Emilie Briscoe	29.1492	2.01179	30.4559	3.48433	0.542119	32.7519	23.303	1.36741	30.4559	7.91905	0.898673	32.7519	16.94	1.22891	30.4559	5.40446	0.732752	32.7519	19.7239	1.29499
Sample	Sample iPSC	Human	Human iPSC	H6	H6 iPSC	H20961	H20961 iPSC	H20961 iPSC - BGLAP	iPSC	BGLAP	1	H6I2	study-collection-qPCR-H6 - plate2	2021-10-13	Emilie Briscoe	33.6858	1.8868	32.5174	1.45866	0.163955	34.2326	7.52258	0.876367	32.5174	1.62873	0.211848	34.2326	1.43693	0.157437	32.5174	1.54086	0.187764	34.2326	3.30778	0.519537
Sample	Sample iPSC	Human	Human iPSC	H6	H6 iPSC	H20961	H20961 iPSC	H20961 iPSC - BGLAP	iPSC	BGLAP	2	H6I2	study-collection-qPCR-H6 - plate2	2021-10-13	Emilie Briscoe	31.9625	1.8868	32.5174	0.834001	-0.0788335	34.2326	4.30109	0.633578	32.5174	0.957653	-0.0187918	34.2326	0.844884	-0.0732028	32.5174	0.893213	-0.049045	34.2326	1.91746	0.282727
Sample	Sample iPSC	Human	Human iPSC	H6	H6 iPSC	H20961	H20961 iPSC	H20961 iPSC - BGLAP	iPSC	BGLAP	3	H6I2	study-collection-qPCR-H6 - plate2	2021-10-13	Emilie Briscoe	31.9038	1.8868	32.5174	0.822012	-0.0851217	34.2326	4.23926	0.62729	32.5174	0.641127	-0.193056	34.2326	0.565631	-0.247467	32.5174	0.726575	-0.138719	34.2326	1.55974	0.193053
Sample	Sample MSC	Human	Human MSC	H6	H6 MSC	H20961	H20961 MSC	H20961 MSC - BGLAP	MSC	BGLAP	1	H6M2	study-collection-qPCR-H6 - plate2	2021-10-13	Emilie Briscoe	34.9881	1.8868	32.5174	0.143369	-0.843544	34.2326	0.73938	-0.131132	32.5174	1.04036	0.0171834	34.2326	0.917851	-0.0372276	32.5174	0.383457	-0.416284	34.2326	0.823168	-0.0845116
Sample	Sample MSC	Human	Human MSC	H6	H6 MSC	H20961	H20961 MSC	H20961 MSC - BGLAP	MSC	BGLAP	2	H6M2	study-collection-qPCR-H6 - plate2	2021-10-13	Emilie Briscoe	33.4771	1.8868	32.5174	0.264178	-0.578103	34.2326	1.36241	0.134309	32.5174	1.46057	0.164521	34.2326	1.28858	0.11011	32.5174	0.617333	-0.209481	34.2326	1.32523	0.122291
Sample	Sample MSC	Human	Human MSC	H6	H6 MSC	H20961	H20961 MSC	H20961 MSC - BGLAP	MSC	BGLAP	3	H6M2	study-collection-qPCR-H6 - plate2	2021-10-13	Emilie Briscoe	Undetermined	1.8868	32.5174			34.2326			32.5174			34.2326			32.5174			34.2326
Sample	Sample Adipogenic	Human	Human Adipogenic	H6	H6 Adipogenic	H20961	H20961 Adipogenic	H20961 Adipogenic - BGLAP	Adipogenic	BGLAP	1	H6A1	study-collection-qPCR-H6 - plate2	2021-10-13	Emilie Briscoe	35.1856	1.8868	32.5174	2.42218	0.384206	34.2326	12.4916	1.09662	32.5174	1.55193	0.190873	34.2326	1.36919	0.136462	32.5174	1.94229	0.288315	34.2326	4.16953	0.620087
Sample	Sample Adipogenic	Human	Human Adipogenic	H6	H6 Adipogenic	H20961	H20961 Adipogenic	H20961 Adipogenic - BGLAP	Adipogenic	BGLAP	2	H6A1	study-collection-qPCR-H6 - plate2	2021-10-13	Emilie Briscoe	35.2429	1.8868	32.5174	0.222917	-0.651856	34.2326	1.14962	0.0605556	32.5174	0.553098	-0.257198	34.2326	0.487968	-0.311609	32.5174	0.349995	-0.455938	34.2326	0.751337	-0.124165
Sample	Sample Adipogenic	Human	Human Adipogenic	H6	H6 Adipogenic	H20961	H20961 Adipogenic	H20961 Adipogenic - BGLAP	Adipogenic	BGLAP	3	H6A1	study-collection-qPCR-H6 - plate2	2021-10-13	Emilie Briscoe	Undetermined	1.8868	32.5174			34.2326			32.5174			34.2326			32.5174			34.2326
Sample	Sample Chondrogenic	Human	Human Chondrogenic	H6	H6 Chondrogenic	H20961	H20961 Chondrogenic	H20961 Chondrogenic - BGLAP	Chondrogenic	BGLAP	1	H6C1	study-collection-qPCR-H6 - plate2	2021-10-13	Emilie Briscoe	34.8957	1.8868	32.5174	1.1459	0.0591472	34.2326	5.90961	0.771559	32.5174	2.9799	0.474202	34.2326	2.629	0.419791	32.5174	1.84177	0.265235	34.2326	3.95373	0.597007
Sample	Sample Chondrogenic	Human	Human Chondrogenic	H6	H6 Chondrogenic	H20961	H20961 Chondrogenic	H20961 Chondrogenic - BGLAP	Chondrogenic	BGLAP	2	H6C1	study-collection-qPCR-H6 - plate2	2021-10-13	Emilie Briscoe	33.7917	1.8868	32.5174	0.449622	-0.347153	34.2326	2.31878	0.365259	32.5174	1.17245	0.0690947	34.2326	1.03439	0.0146837	32.5174	0.723563	-0.140524	34.2326	1.55327	0.191248
Sample	Sample Chondrogenic	Human	Human Chondrogenic	H6	H6 Chondrogenic	H20961	H20961 Chondrogenic	H20961 Chondrogenic - BGLAP	Chondrogenic	BGLAP	3	H6C1	study-collection-qPCR-H6 - plate2	2021-10-13	Emilie Briscoe	33.5606	1.8868	32.5174	0.601135	-0.221028	34.2326	3.10016	0.491384	32.5174	1.33522	0.125554	34.2326	1.17799	0.0711427	32.5174	0.893352	-0.0489773	34.2326	1.91776	0.282795
Sample	Sample Osteogenic	Human	Human Osteogenic	H6	H6 Osteogenic	H20961	H20961 Osteogenic	H20961 Osteogenic - BGLAP	Osteogenic	BGLAP	1	H6O3	study-collection-qPCR-H6 - plate2	2021-10-13	Emilie Briscoe	25.4289	1.8868	32.5174	385.539	2.58607	34.2326	1988.29	3.29848	32.5174	239.319	2.37898	34.2326	211.138	2.32457	32.5174	304.307	2.48331	34.2326	653.257	2.81508
Sample	Sample Osteogenic	Human	Human Osteogenic	H6	H6 Osteogenic	H20961	H20961 Osteogenic	H20961 Osteogenic - BGLAP	Osteogenic	BGLAP	2	H6O3	study-collection-qPCR-H6 - plate2	2021-10-13	Emilie Briscoe	24.9745	1.8868	32.5174	296.18	2.47156	34.2326	1527.45	3.18397	32.5174	262.2	2.41863	34.2326	231.325	2.36422	32.5174	278.813	2.44531	34.2326	598.528	2.77708
Sample	Sample Osteogenic	Human	Human Osteogenic	H6	H6 Osteogenic	H20961	H20961 Osteogenic	H20961 Osteogenic - BGLAP	Osteogenic	BGLAP	3	H6O3	study-collection-qPCR-H6 - plate2	2021-10-13	Emilie Briscoe	25.2828	1.8868	32.5174	285.178	2.45512	34.2326	1470.71	3.16753	32.5174	282.638	2.45123	34.2326	249.356	2.39682	32.5174	283.936	2.45322	34.2326	609.526	2.78499
Sample	Sample iPSC	Chimpanzee	Chimpanzee iPSC	C1-r2	C1-r2 iPSC	C8861	C8861 (rep2) iPSC	C8861 (rep2) iPSC - BGLAP	iPSC	BGLAP	1	C1Ir2	study-collection-qPCR-C1r - plate2	2020-11-03	Emilie Briscoe	33.0013	1.87487	31.838	1.22489	0.0880984	36.7093	56.5132	1.75215	31.838	0.78238	-0.106582	36.7093	12.4927	1.09665	31.838	0.967089	-0.0145334	36.7093	25.1567	1.40065
Sample	Sample iPSC	Chimpanzee	Chimpanzee iPSC	C1-r2	C1-r2 iPSC	C8861	C8861 (rep2) iPSC	C8861 (rep2) iPSC - BGLAP	iPSC	BGLAP	2	C1Ir2	study-collection-qPCR-C1r - plate2	2020-11-03	Emilie Briscoe	31.0434	1.87487	31.838	1.14244	0.0578347	36.7093	52.7092	1.72189	31.838	1.28246	0.108045	36.7093	20.4777	1.31128	31.838	1.2128	0.0837885	36.7093	31.5483	1.49898
Sample	Sample iPSC	Chimpanzee	Chimpanzee iPSC	C1-r2	C1-r2 iPSC	C8861	C8861 (rep2) iPSC	C8861 (rep2) iPSC - BGLAP	iPSC	BGLAP	3	C1Ir2	study-collection-qPCR-C1r - plate2	2020-11-03	Emilie Briscoe	31.4693	1.87487	31.838	0.714606	-0.145933	36.7093	32.9699	1.51812	31.838	0.996637	-0.00146294	36.7093	15.9138	1.20177	31.838	0.852599	-0.0692552	36.7093	22.1785	1.34593
Sample	Sample MSC	Chimpanzee	Chimpanzee MSC	C1-r2	C1-r2 MSC	C8861	C8861 (rep2) MSC	C8861 (rep2) MSC - BGLAP	MSC	BGLAP	1	C1Mr1	study-collection-qPCR-C1r - plate2	2020-11-03	Emilie Briscoe	35.4566	1.87487	31.838	0.0806731	-1.09327	36.7093	3.72203	0.57078	31.838	0.210563	-0.676619	36.7093	3.36216	0.526618	31.838	0.136022	-0.866391	36.7093	3.53831	0.548796
Sample	Sample MSC	Chimpanzee	Chimpanzee MSC	C1-r2	C1-r2 MSC	C8861	C8861 (rep2) MSC	C8861 (rep2) MSC - BGLAP	MSC	BGLAP	2	C1Mr1	study-collection-qPCR-C1r - plate2	2020-11-03	Emilie Briscoe	39.123	1.87487	31.838	0.00375651	-2.42522	36.7093	0.173315	-0.761164	31.838	0.0102252	-1.99033	36.7093	0.163271	-0.787092	31.838	0.00643427	-2.1915	36.7093	0.167373	-0.776314
Sample	Sample MSC	Chimpanzee	Chimpanzee MSC	C1-r2	C1-r2 MSC	C8861	C8861 (rep2) MSC	C8861 (rep2) MSC - BGLAP	MSC	BGLAP	3	C1Mr1	study-collection-qPCR-C1r - plate2	2020-11-03	Emilie Briscoe	35.5482	1.87487	31.838	0.0335995	-1.47367	36.7093	1.55019	0.190384	31.838	0.114087	-0.942764	36.7093	1.82168	0.260473	31.838	0.064913	-1.18767	36.7093	1.68857	0.227518
Sample	Sample Adipogenic	Chimpanzee	Chimpanzee Adipogenic	C1-r2	C1-r2 Adipogenic	C8861	C8861 (rep2) Adipogenic	C8861 (rep2) Adipogenic - BGLAP	Adipogenic	BGLAP	1	C1Ar2	study-collection-qPCR-C1r - plate2	2020-11-03	Emilie Briscoe	36.5488	1.87487	31.838	0.37477	-0.426235	36.7093	17.2908	1.23782	31.838	0.0493332	-1.30686	36.7093	0.787729	-0.103623	31.838	0.125972	-0.899728	36.7093	3.27687	0.515459
Sample	Sample Adipogenic	Chimpanzee	Chimpanzee Adipogenic	C1-r2	C1-r2 Adipogenic	C8861	C8861 (rep2) Adipogenic	C8861 (rep2) Adipogenic - BGLAP	Adipogenic	BGLAP	2	C1Ar2	study-collection-qPCR-C1r - plate2	2020-11-03	Emilie Briscoe	34.8373	1.87487	31.838	0.174252	-0.758823	36.7093	8.03948	0.905228	31.838	0.0813191	-1.08981	36.7093	1.29846	0.11343	31.838	0.115006	-0.939281	36.7093	2.99162	0.475906
Sample	Sample Adipogenic	Chimpanzee	Chimpanzee Adipogenic	C1-r2	C1-r2 Adipogenic	C8861	C8861 (rep2) Adipogenic	C8861 (rep2) Adipogenic - BGLAP	Adipogenic	BGLAP	3	C1Ar2	study-collection-qPCR-C1r - plate2	2020-11-03	Emilie Briscoe	34.8318	1.87487	31.838	0.251676	-0.599158	36.7093	11.6116	1.06489	31.838	0.0798551	-1.0977	36.7093	1.27509	0.10554	31.838	0.134972	-0.869758	36.7093	3.51099	0.545429
Sample	Sample Chondrogenic	Chimpanzee	Chimpanzee Chondrogenic	C1-r2	C1-r2 Chondrogenic	C8861	C8861 (rep2) Chondrogenic	C8861 (rep2) Chondrogenic - BGLAP	Chondrogenic	BGLAP	1	C1Cr2	study-collection-qPCR-C1r - plate2	2020-11-03	Emilie Briscoe	36.07	1.87487	31.838	0.302709	-0.518975	36.7093	13.9661	1.14508	31.838	0.123131	-0.909634	36.7093	1.96609	0.293603	31.838	0.187669	-0.726608	36.7093	4.88179	0.688579
Sample	Sample Chondrogenic	Chimpanzee	Chimpanzee Chondrogenic	C1-r2	C1-r2 Chondrogenic	C8861	C8861 (rep2) Chondrogenic	C8861 (rep2) Chondrogenic - BGLAP	Chondrogenic	BGLAP	2	C1Cr2	study-collection-qPCR-C1r - plate2	2020-11-03	Emilie Briscoe	Undetermined	1.87487	31.838			36.7093			31.838			36.7093			31.838			36.7093
Sample	Sample Chondrogenic	Chimpanzee	Chimpanzee Chondrogenic	C1-r2	C1-r2 Chondrogenic	C8861	C8861 (rep2) Chondrogenic	C8861 (rep2) Chondrogenic - BGLAP	Chondrogenic	BGLAP	3	C1Cr2	study-collection-qPCR-C1r - plate2	2020-11-03	Emilie Briscoe	Undetermined	1.87487	31.838			36.7093			31.838			36.7093			31.838			36.7093
Sample	Sample Osteogenic	Chimpanzee	Chimpanzee Osteogenic	C1-r2	C1-r2 Osteogenic	C8861	C8861 (rep2) Osteogenic	C8861 (rep2) Osteogenic - BGLAP	Osteogenic	BGLAP	1	C1Or2	study-collection-qPCR-C1r - plate2	2020-11-03	Emilie Briscoe	34.358	1.87487	31.838	0.995314	-0.00204009	36.7093	45.921	1.66201	31.838	0.316515	-0.499605	36.7093	5.05396	0.703632	31.838	0.539917	-0.267673	36.7093	14.0448	1.14751
Sample	Sample Osteogenic	Chimpanzee	Chimpanzee Osteogenic	C1-r2	C1-r2 Osteogenic	C8861	C8861 (rep2) Osteogenic	C8861 (rep2) Osteogenic - BGLAP	Osteogenic	BGLAP	2	C1Or2	study-collection-qPCR-C1r - plate2	2020-11-03	Emilie Briscoe	33.9807	1.87487	31.838	0.308551	-0.510673	36.7093	14.2357	1.15338	31.838	0.237953	-0.623508	36.7093	3.79952	0.579729	31.838	0.268113	-0.571682	36.7093	6.97436	0.843505
Sample	Sample Osteogenic	Chimpanzee	Chimpanzee Osteogenic	C1-r2	C1-r2 Osteogenic	C8861	C8861 (rep2) Osteogenic	C8861 (rep2) Osteogenic - BGLAP	Osteogenic	BGLAP	3	C1Or2	study-collection-qPCR-C1r - plate2	2020-11-03	Emilie Briscoe	34.711	1.87487	31.838	0.313784	-0.503369	36.7093	14.4771	1.16068	31.838	0.159728	-0.79662	36.7093	2.55045	0.406617	31.838	0.218225	-0.661095	36.7093	5.67665	0.754092
Sample	Sample iPSC	Chimpanzee	Chimpanzee iPSC	C2	C2 iPSC	C3647	C3647 iPSC	C3647 iPSC - BGLAP	iPSC	BGLAP	1	C2I2	study-collection-qPCR-C2 - plate2	2020-08-18	Emilie Briscoe	32.5595	1.84083	32.5668	2.01097	0.303406	33.7392	1.90394	0.279653	32.5668	1.44196	0.158953	33.7392	0.680659	-0.16707	32.5668	1.69318	0.228702	33.7392	1.11279	0.0464115
Sample	Sample iPSC	Chimpanzee	Chimpanzee iPSC	C2	C2 iPSC	C3647	C3647 iPSC	C3647 iPSC - BGLAP	iPSC	BGLAP	2	C2I2	study-collection-qPCR-C2 - plate2	2020-08-18	Emilie Briscoe	32.5012	1.84083	32.5668	0.808555	-0.0922902	33.7392	0.76552	-0.116043	32.5668	0.835159	-0.078231	33.7392	0.394226	-0.404255	32.5668	0.821856	-0.085204	33.7392	0.540139	-0.267494
Sample	Sample iPSC	Chimpanzee	Chimpanzee iPSC	C2	C2 iPSC	C3647	C3647 iPSC	C3647 iPSC - BGLAP	iPSC	BGLAP	3	C2I2	study-collection-qPCR-C2 - plate2	2020-08-18	Emilie Briscoe	32.6396	1.84083	32.5668	0.615013	-0.211116	33.7392	0.582279	-0.234869	32.5668	0.830381	-0.0807224	33.7392	0.391971	-0.406746	32.5668	0.718625	-0.143498	33.7392	0.472293	-0.325788
Sample	Sample MSC	Chimpanzee	Chimpanzee MSC	C2	C2 MSC	C3647	C3647 MSC	C3647 MSC - BGLAP	MSC	BGLAP	1	C2M2	study-collection-qPCR-C2 - plate2	2020-08-18	Emilie Briscoe	33.2365	1.84083	32.5668	1.99547	0.300045	33.7392	1.88926	0.276292	32.5668	4.58313	0.661162	33.7392	2.16341	0.335139	32.5668	3.08763	0.489626	33.7392	2.02925	0.307335
Sample	Sample MSC	Chimpanzee	Chimpanzee MSC	C2	C2 MSC	C3647	C3647 MSC	C3647 MSC - BGLAP	MSC	BGLAP	2	C2M2	study-collection-qPCR-C2 - plate2	2020-08-18	Emilie Briscoe	33.6666	1.84083	32.5668	1.29223	0.111341	33.7392	1.22346	0.0875881	32.5668	1.53567	0.186297	33.7392	0.724892	-0.139727	32.5668	1.41706	0.151389	33.7392	0.93132	-0.030901
Sample	Sample MSC	Chimpanzee	Chimpanzee MSC	C2	C2 MSC	C3647	C3647 MSC	C3647 MSC - BGLAP	MSC	BGLAP	3	C2M2	study-collection-qPCR-C2 - plate2	2020-08-18	Emilie Briscoe	34.3145	1.84083	32.5668	0.456955	-0.340127	33.7392	0.432634	-0.36388	32.5668	1.35086	0.130611	33.7392	0.637658	-0.195412	32.5668	0.805111	-0.094144	33.7392	0.529134	-0.276434
Sample	Sample Adipogenic	Chimpanzee	Chimpanzee Adipogenic	C2	C2 Adipogenic	C3647	C3647 Adipogenic	C3647 Adipogenic - BGLAP	Adipogenic	BGLAP	1	C2A2	study-collection-qPCR-C2 - plate2	2020-08-18	Emilie Briscoe	32.7036	1.84083	32.5668	8.78974	0.943976	33.7392	8.3219	0.920223	32.5668	1.86406	0.27046	33.7392	0.879907	-0.0555631	32.5668	3.93268	0.594689	33.7392	2.58463	0.412398
Sample	Sample Adipogenic	Chimpanzee	Chimpanzee Adipogenic	C2	C2 Adipogenic	C3647	C3647 Adipogenic	C3647 Adipogenic - BGLAP	Adipogenic	BGLAP	2	C2A2	study-collection-qPCR-C2 - plate2	2020-08-18	Emilie Briscoe	31.8411	1.84083	32.5668	15.7421	1.19706	33.7392	14.9043	1.17331	32.5668	2.74531	0.438592	33.7392	1.29589	0.112568	32.5668	6.36048	0.80349	33.7392	4.18022	0.6212
Sample	Sample Adipogenic	Chimpanzee	Chimpanzee Adipogenic	C2	C2 Adipogenic	C3647	C3647 Adipogenic	C3647 Adipogenic - BGLAP	Adipogenic	BGLAP	3	C2A2	study-collection-qPCR-C2 - plate2	2020-08-18	Emilie Briscoe	32.4406	1.84083	32.5668	6.81013	0.833156	33.7392	6.44766	0.809402	32.5668	1.75848	0.245138	33.7392	0.830069	-0.0808858	32.5668	3.37349	0.528079	33.7392	2.21712	0.345788
Sample	Sample Chondrogenic	Chimpanzee	Chimpanzee Chondrogenic	C2	C2 Chondrogenic	C3647	C3647 Chondrogenic	C3647 Chondrogenic - BGLAP	Chondrogenic	BGLAP	1	C2C2	study-collection-qPCR-C2 - plate2	2020-08-18	Emilie Briscoe	38.3176	1.84083	32.5668	0.63776	-0.195343	33.7392	0.603815	-0.219096	32.5668	0.11202	-0.950704	33.7392	0.0528777	-1.27673	32.5668	0.25909	-0.586549	33.7392	0.170279	-0.768839
Sample	Sample Chondrogenic	Chimpanzee	Chimpanzee Chondrogenic	C2	C2 Chondrogenic	C3647	C3647 Chondrogenic	C3647 Chondrogenic - BGLAP	Chondrogenic	BGLAP	2	C2C2	study-collection-qPCR-C2 - plate2	2020-08-18	Emilie Briscoe	34.5322	1.84083	32.5668	2.50111	0.398133	33.7392	2.36799	0.374379	32.5668	0.900235	-0.0456439	33.7392	0.424945	-0.371668	32.5668	1.4744	0.168616	33.7392	0.969004	-0.0136743
Sample	Sample Chondrogenic	Chimpanzee	Chimpanzee Chondrogenic	C2	C2 Chondrogenic	C3647	C3647 Chondrogenic	C3647 Chondrogenic - BGLAP	Chondrogenic	BGLAP	3	C2C2	study-collection-qPCR-C2 - plate2	2020-08-18	Emilie Briscoe	35.5814	1.84083	32.5668	1.32121	0.120972	33.7392	1.25089	0.0972189	32.5668	0.381663	-0.418319	33.7392	0.180159	-0.744343	32.5668	0.694391	-0.158396	33.7392	0.456366	-0.340686
Sample	Sample Osteogenic	Chimpanzee	Chimpanzee Osteogenic	C2	C2 Osteogenic	C3647	C3647 Osteogenic	C3647 Osteogenic - BGLAP	Osteogenic	BGLAP	1	C2O1	study-collection-qPCR-C2 - plate2	2020-08-18	Emilie Briscoe	33.8909	1.84083	32.5668	3.3042	0.519066	33.7392	3.12833	0.495313	32.5668	2.24295	0.350819	33.7392	1.05876	0.0247956	32.5668	2.71174	0.433249	33.7392	1.78221	0.250958
Sample	Sample Osteogenic	Chimpanzee	Chimpanzee Osteogenic	C2	C2 Osteogenic	C3647	C3647 Osteogenic	C3647 Osteogenic - BGLAP	Osteogenic	BGLAP	2	C2O1	study-collection-qPCR-C2 - plate2	2020-08-18	Emilie Briscoe	33.9645	1.84083	32.5668	2.34869	0.370826	33.7392	2.22368	0.347073	32.5668	1.01824	0.00785207	33.7392	0.480649	-0.318172	32.5668	1.52432	0.183076	33.7392	1.00181	0.000785558
Sample	Sample Osteogenic	Chimpanzee	Chimpanzee Osteogenic	C2	C2 Osteogenic	C3647	C3647 Osteogenic	C3647 Osteogenic - BGLAP	Osteogenic	BGLAP	3	C2O1	study-collection-qPCR-C2 - plate2	2020-08-18	Emilie Briscoe	32.5556	1.84083	32.5668	3.85981	0.586566	33.7392	3.65438	0.562813	32.5668	1.74238	0.241142	33.7392	0.822467	-0.0848815	32.5668	2.55631	0.407614	33.7392	1.68006	0.225324
Sample	Sample iPSC	Chimpanzee	Chimpanzee iPSC	C3	C3 iPSC	C3649	C3649 iPSC	C3649 iPSC - BGLAP	iPSC	BGLAP	1	C3I2	study-collection-qPCR-C3 - plate2	2020-09-03	Emilie Briscoe	31.9852	2.05482	31.6158	1.72158	0.235927	33.5131	5.73257	0.758349	31.6158	1.57143	0.196295	33.5131	7.08942	0.850611	31.6158	1.64532	0.216251	33.5131	6.42559	0.807913
Sample	Sample iPSC	Chimpanzee	Chimpanzee iPSC	C3	C3 iPSC	C3649	C3649 iPSC	C3649 iPSC - BGLAP	iPSC	BGLAP	2	C3I2	study-collection-qPCR-C3 - plate2	2020-09-03	Emilie Briscoe	31.5529	2.05482	31.6158	0.659382	-0.180863	33.5131	2.19563	0.34156	31.6158	0.802121	-0.09576	33.5131	3.61872	0.558556	31.6158	0.729935	-0.136716	33.5131	2.85066	0.454946
Sample	Sample iPSC	Chimpanzee	Chimpanzee iPSC	C3	C3 iPSC	C3649	C3649 iPSC	C3649 iPSC - BGLAP	iPSC	BGLAP	3	C3I2	study-collection-qPCR-C3 - plate2	2020-09-03	Emilie Briscoe	31.3094	2.05482	31.6158	0.88092	-0.0550633	33.5131	2.93332	0.467359	31.6158	0.79335	-0.100535	33.5131	3.57915	0.55378	31.6158	0.832656	-0.0795346	33.5131	3.25183	0.512128
Sample	Sample MSC	Chimpanzee	Chimpanzee MSC	C3	C3 MSC	C3649	C3649 MSC	C3649 MSC - BGLAP	MSC	BGLAP	1	C3M2	study-collection-qPCR-C3 - plate2	2020-09-03	Emilie Briscoe	35.4056	2.05482	31.6158	0.131431	-0.881302	33.5131	0.437644	-0.358879	31.6158	0.0958217	-1.01854	33.5131	0.432294	-0.364221	31.6158	0.111543	-0.952558	33.5131	0.435616	-0.360896
Sample	Sample MSC	Chimpanzee	Chimpanzee MSC	C3	C3 MSC	C3649	C3649 MSC	C3649 MSC - BGLAP	MSC	BGLAP	2	C3M2	study-collection-qPCR-C3 - plate2	2020-09-03	Emilie Briscoe	32.4036	2.05482	31.6158	0.44937	-0.347396	33.5131	1.49633	0.175026	31.6158	0.377208	-0.423419	33.5131	1.70175	0.230896	31.6158	0.409457	-0.387791	33.5131	1.59908	0.203871
Sample	Sample MSC	Chimpanzee	Chimpanzee MSC	C3	C3 MSC	C3649	C3649 MSC	C3649 MSC - BGLAP	MSC	BGLAP	3	C3M2	study-collection-qPCR-C3 - plate2	2020-09-03	Emilie Briscoe	32.7301	2.05482	31.6158	0.458595	-0.33857	33.5131	1.52705	0.183853	31.6158	0.301307	-0.520991	33.5131	1.35933	0.133324	31.6158	0.367589	-0.434637	33.5131	1.43557	0.157025
Sample	Sample Adipogenic	Chimpanzee	Chimpanzee Adipogenic	C3	C3 Adipogenic	C3649	C3649 Adipogenic	C3649 Adipogenic - BGLAP	Adipogenic	BGLAP	1	C3A2	study-collection-qPCR-C3 - plate2	2020-09-03	Emilie Briscoe	32.176	2.05482	31.6158	1.07476	0.0313114	33.5131	3.57877	0.553734	31.6158	0.44307	-0.353527	33.5131	1.99889	0.300788	31.6158	0.674965	-0.170718	33.5131	2.63599	0.420944
Sample	Sample Adipogenic	Chimpanzee	Chimpanzee Adipogenic	C3	C3 Adipogenic	C3649	C3649 Adipogenic	C3649 Adipogenic - BGLAP	Adipogenic	BGLAP	2	C3A2	study-collection-qPCR-C3 - plate2	2020-09-03	Emilie Briscoe	31.0567	2.05482	31.6158	0.824541	-0.0837876	33.5131	2.74559	0.438635	31.6158	0.383638	-0.416079	33.5131	1.73076	0.238237	31.6158	0.549887	-0.259726	33.5131	2.14751	0.331936
Sample	Sample Adipogenic	Chimpanzee	Chimpanzee Adipogenic	C3	C3 Adipogenic	C3649	C3649 Adipogenic	C3649 Adipogenic - BGLAP	Adipogenic	BGLAP	3	C3A2	study-collection-qPCR-C3 - plate2	2020-09-03	Emilie Briscoe	32.1107	2.05482	31.6158	0.494649	-0.305703	33.5131	1.6471	0.21672	31.6158	0.247343	-0.606701	33.5131	1.11587	0.0476148	31.6158	0.342936	-0.464787	33.5131	1.33929	0.126875
Sample	Sample Chondrogenic	Chimpanzee	Chimpanzee Chondrogenic	C3	C3 Chondrogenic	C3649	C3649 Chondrogenic	C3649 Chondrogenic - BGLAP	Chondrogenic	BGLAP	1	C3C2	study-collection-qPCR-C3 - plate2	2020-09-03	Emilie Briscoe	39.8697	2.05482	31.6158	0.066751	-1.17554	33.5131	0.22227	-0.653119	31.6158	0.00360294	-2.44334	33.5131	0.0162545	-1.78903	31.6158	0.0145004	-1.83862	33.5131	0.0566293	-1.24696
Sample	Sample Chondrogenic	Chimpanzee	Chimpanzee Chondrogenic	C3	C3 Chondrogenic	C3649	C3649 Chondrogenic	C3649 Chondrogenic - BGLAP	Chondrogenic	BGLAP	2	C3C2	study-collection-qPCR-C3 - plate2	2020-09-03	Emilie Briscoe	31.7074	2.05482	31.6158	2.01759	0.304834	33.5131	6.71825	0.827256	31.6158	0.438459	-0.358071	33.5131	1.97808	0.296244	31.6158	0.905212	-0.0432499	33.5131	3.53519	0.548412
Sample	Sample Chondrogenic	Chimpanzee	Chimpanzee Chondrogenic	C3	C3 Chondrogenic	C3649	C3649 Chondrogenic	C3649 Chondrogenic - BGLAP	Chondrogenic	BGLAP	3	C3C2	study-collection-qPCR-C3 - plate2	2020-09-03	Emilie Briscoe	32.8132	2.05482	31.6158	0.721014	-0.142056	33.5131	2.40086	0.380366	31.6158	0.203083	-0.692326	33.5131	0.916197	-0.0380109	31.6158	0.370554	-0.431148	33.5131	1.44715	0.160514
Sample	Sample Osteogenic	Chimpanzee	Chimpanzee Osteogenic	C3	C3 Osteogenic	C3649	C3649 Osteogenic	C3649 Osteogenic - BGLAP	Osteogenic	BGLAP	1	C3O2	study-collection-qPCR-C3 - plate2	2020-09-03	Emilie Briscoe	33.8989	2.05482	31.6158	0.37019	-0.431575	33.5131	1.23267	0.0908476	31.6158	0.363101	-0.439972	33.5131	1.63811	0.214343	31.6158	0.367255	-0.435033	33.5131	1.43427	0.15663
Sample	Sample Osteogenic	Chimpanzee	Chimpanzee Osteogenic	C3	C3 Osteogenic	C3649	C3649 Osteogenic	C3649 Osteogenic - BGLAP	Osteogenic	BGLAP	2	C3O2	study-collection-qPCR-C3 - plate2	2020-09-03	Emilie Briscoe	31.0772	2.05482	31.6158	1.36294	0.134477	33.5131	4.53837	0.6569	31.6158	1.24122	0.0938479	33.5131	5.59968	0.748163	31.6158	1.29705	0.112957	33.5131	5.06546	0.704619
Sample	Sample Osteogenic	Chimpanzee	Chimpanzee Osteogenic	C3	C3 Osteogenic	C3649	C3649 Osteogenic	C3649 Osteogenic - BGLAP	Osteogenic	BGLAP	3	C3O2	study-collection-qPCR-C3 - plate2	2020-09-03	Emilie Briscoe	31.4641	2.05482	31.6158	1.30667	0.116167	33.5131	4.35101	0.63859	31.6158	0.879854	-0.0555893	33.5131	3.96941	0.598726	31.6158	1.0615	0.0259193	33.5131	4.14554	0.617582
Sample	Sample iPSC	Chimpanzee	Chimpanzee iPSC	C4	C4 iPSC	C40210	C40210 iPSC	C40210 iPSC - BGLAP	iPSC	BGLAP	1	C4I2	study-collection-qPCR-C4 - plate2	2020-09-22	Emilie Briscoe	33.5294	2.01698	31.51	0.809807	-0.0916187	32.2279	1.1938	0.0769324	31.51	0.313034	-0.504409	32.2279	0.693517	-0.158943	31.51	0.491519	-0.30846	32.2279	0.899118	-0.0461834
Sample	Sample iPSC	Chimpanzee	Chimpanzee iPSC	C4	C4 iPSC	C40210	C40210 iPSC	C40210 iPSC - BGLAP	iPSC	BGLAP	2	C4I2	study-collection-qPCR-C4 - plate2	2020-09-22	Emilie Briscoe	30.7934	2.01698	31.51	1.03581	0.0152784	32.2279	1.52697	0.183829	31.51	1.80155	0.255647	32.2279	3.99128	0.601112	31.51	1.38678	0.142008	32.2279	2.53679	0.404284
Sample	Sample iPSC	Chimpanzee	Chimpanzee iPSC	C4	C4 iPSC	C40210	C40210 iPSC	C40210 iPSC - BGLAP	iPSC	BGLAP	3	C4I2	study-collection-qPCR-C4 - plate2	2020-09-22	Emilie Briscoe	30.2073	2.01698	31.51	1.19218	0.0763403	32.2279	1.75748	0.244891	31.51	1.77322	0.248762	32.2279	3.92851	0.594228	31.51	1.46707	0.166452	32.2279	2.68367	0.428729
Sample	Sample MSC	Chimpanzee	Chimpanzee MSC	C4	C4 MSC	C40210	C40210 MSC	C40210 MSC - BGLAP	MSC	BGLAP	1	C4M2	study-collection-qPCR-C4 - plate2	2020-09-22	Emilie Briscoe	31.9913	2.01698	31.51	2.32846	0.36707	32.2279	3.43258	0.535621	31.51	0.750591	-0.124597	32.2279	1.66291	0.220869	31.51	1.2832	0.108295	32.2279	2.34731	0.370571
Sample	Sample MSC	Chimpanzee	Chimpanzee MSC	C4	C4 MSC	C40210	C40210 MSC	C40210 MSC - BGLAP	MSC	BGLAP	2	C4M2	study-collection-qPCR-C4 - plate2	2020-09-22	Emilie Briscoe	32.1015	2.01698	31.51	0.417134	-0.379724	32.2279	0.614932	-0.211173	31.51	0.405088	-0.39245	32.2279	0.897461	-0.0469845	31.51	0.409838	-0.387388	32.2279	0.749702	-0.125112
Sample	Sample MSC	Chimpanzee	Chimpanzee MSC	C4	C4 MSC	C40210	C40210 MSC	C40210 MSC - BGLAP	MSC	BGLAP	3	C4M2	study-collection-qPCR-C4 - plate2	2020-09-22	Emilie Briscoe	32.5909	2.01698	31.51	0.321367	-0.492999	32.2279	0.473753	-0.324448	31.51	0.302447	-0.51935	32.2279	0.670063	-0.173884	31.51	0.310645	-0.507736	32.2279	0.568251	-0.24546
Sample	Sample Adipogenic	Chimpanzee	Chimpanzee Adipogenic	C4	C4 Adipogenic	C40210	C40210 Adipogenic	C40210 Adipogenic - BGLAP	Adipogenic	BGLAP	1	C4A2	study-collection-qPCR-C4 - plate2	2020-09-22	Emilie Briscoe	30.8535	2.01698	31.51	4.22141	0.625457	32.2279	6.22312	0.794008	31.51	0.570848	-0.24348	32.2279	1.2647	0.101986	31.51	1.4653	0.165926	32.2279	2.68042	0.428203
Sample	Sample Adipogenic	Chimpanzee	Chimpanzee Adipogenic	C4	C4 Adipogenic	C40210	C40210 Adipogenic	C40210 Adipogenic - BGLAP	Adipogenic	BGLAP	2	C4A2	study-collection-qPCR-C4 - plate2	2020-09-22	Emilie Briscoe	31.0736	2.01698	31.51	1.78076	0.250604	32.2279	2.62516	0.419155	31.51	0.404922	-0.392629	32.2279	0.897092	-0.0471629	31.51	0.811969	-0.0904605	32.2279	1.48531	0.171816
Sample	Sample Adipogenic	Chimpanzee	Chimpanzee Adipogenic	C4	C4 Adipogenic	C40210	C40210 Adipogenic	C40210 Adipogenic - BGLAP	Adipogenic	BGLAP	3	C4A2	study-collection-qPCR-C4 - plate2	2020-09-22	Emilie Briscoe	31.9701	2.01698	31.51	1.05093	0.0215736	32.2279	1.54926	0.190125	31.51	0.200876	-0.697072	32.2279	0.445035	-0.351606	31.51	0.43718	-0.35934	32.2279	0.799718	-0.0970633
Sample	Sample Chondrogenic	Chimpanzee	Chimpanzee Chondrogenic	C4	C4 Chondrogenic	C40210	C40210 Chondrogenic	C40210 Chondrogenic - BGLAP	Chondrogenic	BGLAP	1	C4C2	study-collection-qPCR-C4 - plate2	2020-09-22	Emilie Briscoe	33.0542	2.01698	31.51	5.44552	0.736039	32.2279	8.02769	0.90459	31.51	0.361436	-0.441968	32.2279	0.800751	-0.0965026	31.51	1.30592	0.115917	32.2279	2.38888	0.378194
Sample	Sample Chondrogenic	Chimpanzee	Chimpanzee Chondrogenic	C4	C4 Chondrogenic	C40210	C40210 Chondrogenic	C40210 Chondrogenic - BGLAP	Chondrogenic	BGLAP	2	C4C2	study-collection-qPCR-C4 - plate2	2020-09-22	Emilie Briscoe	32.9984	2.01698	31.51	2.12128	0.326597	32.2279	3.12715	0.495148	31.51	0.305114	-0.515538	32.2279	0.67597	-0.170072	31.51	0.763677	-0.11709	32.2279	1.39697	0.145186
Sample	Sample Chondrogenic	Chimpanzee	Chimpanzee Chondrogenic	C4	C4 Chondrogenic	C40210	C40210 Chondrogenic	C40210 Chondrogenic - BGLAP	Chondrogenic	BGLAP	3	C4C2	study-collection-qPCR-C4 - plate2	2020-09-22	Emilie Briscoe	32.8535	2.01698	31.51	1.74426	0.241612	32.2279	2.57136	0.410163	31.51	0.345322	-0.461776	32.2279	0.765049	-0.116311	31.51	0.743056	-0.128978	32.2279	1.35925	0.133298
Sample	Sample Osteogenic	Chimpanzee	Chimpanzee Osteogenic	C4	C4 Osteogenic	C40210	C40210 Osteogenic	C40210 Osteogenic - BGLAP	Osteogenic	BGLAP	1	C4O2	study-collection-qPCR-C4 - plate2	2020-09-22	Emilie Briscoe	32.5151	2.01698	31.51	6.20999	0.793091	32.2279	9.15466	0.961642	31.51	1.23081	0.090191	32.2279	2.72682	0.435657	31.51	2.65947	0.424796	32.2279	4.86488	0.687072
Sample	Sample Osteogenic	Chimpanzee	Chimpanzee Osteogenic	C4	C4 Osteogenic	C40210	C40210 Osteogenic	C40210 Osteogenic - BGLAP	Osteogenic	BGLAP	2	C4O2	study-collection-qPCR-C4 - plate2	2020-09-22	Emilie Briscoe	31.998	2.01698	31.51	5.33686	0.727286	32.2279	7.8675	0.895837	31.51	0.440731	-0.355827	32.2279	0.976425	-0.010361	31.51	1.43238	0.156059	32.2279	2.6202	0.418335
Sample	Sample Osteogenic	Chimpanzee	Chimpanzee Osteogenic	C4	C4 Osteogenic	C40210	C40210 Osteogenic	C40210 Osteogenic - BGLAP	Osteogenic	BGLAP	3	C4O2	study-collection-qPCR-C4 - plate2	2020-09-22	Emilie Briscoe	30.7106	2.01698	31.51	10.9885	1.04094	32.2279	16.199	1.20949	31.51	1.29395	0.111918	32.2279	2.86671	0.457384	31.51	3.55784	0.551187	32.2279	6.50823	0.813463
Sample	Sample iPSC	Chimpanzee	Chimpanzee iPSC	C5	C5 iPSC	C40280	C40280 iPSC	C40280 iPSC - BGLAP	iPSC	BGLAP	1	C5I2	study-collection-qPCR-C5 - plate2	2020-10-06	Emilie Briscoe	30.8264	1.9307	30.6886	1.02763	0.0118378	34.2791	9.10467	0.959264	30.6886	1.25713	0.0993811	34.2791	7.43706	0.871402	30.6886	1.13617	0.0554443	34.2791	8.23188	0.915499
Sample	Sample iPSC	Chimpanzee	Chimpanzee iPSC	C5	C5 iPSC	C40280	C40280 iPSC	C40280 iPSC - BGLAP	iPSC	BGLAP	2	C5I2	study-collection-qPCR-C5 - plate2	2020-10-06	Emilie Briscoe	30.7053	1.9307	30.6886	1.01177	0.00508348	34.2791	8.96416	0.95251	30.6886	0.842846	-0.0742518	34.2791	4.98619	0.697769	30.6886	0.923776	-0.0344334	34.2791	6.69301	0.825621
Sample	Sample iPSC	Chimpanzee	Chimpanzee iPSC	C5	C5 iPSC	C40280	C40280 iPSC	C40280 iPSC - BGLAP	iPSC	BGLAP	3	C5I2	study-collection-qPCR-C5 - plate2	2020-10-06	Emilie Briscoe	30.5342	1.9307	30.6886	0.961787	-0.0169213	34.2791	8.52128	0.930505	30.6886	0.94378	-0.0251294	34.2791	5.5833	0.746891	30.6886	0.952772	-0.021011	34.2791	6.90309	0.839044
Sample	Sample MSC	Chimpanzee	Chimpanzee MSC	C5	C5 MSC	C40280	C40280 MSC	C40280 MSC - BGLAP	MSC	BGLAP	1	C5M2	study-collection-qPCR-C5 - plate2	2020-10-06	Emilie Briscoe	34.0753	1.9307	30.6886	0.119725	-0.921814	34.2791	1.06075	0.0256123	30.6886	0.3284	-0.483597	34.2791	1.94278	0.288424	30.6886	0.197908	-0.703536	34.2791	1.4339	0.156519
Sample	Sample MSC	Chimpanzee	Chimpanzee MSC	C5	C5 MSC	C40280	C40280 MSC	C40280 MSC - BGLAP	MSC	BGLAP	2	C5M2	study-collection-qPCR-C5 - plate2	2020-10-06	Emilie Briscoe	34.2145	1.9307	30.6886	0.122429	-0.912114	34.2791	1.08471	0.0353124	30.6886	0.175696	-0.755238	34.2791	1.0394	0.0167827	30.6886	0.146564	-0.833972	34.2791	1.0619	0.026083
Sample	Sample MSC	Chimpanzee	Chimpanzee MSC	C5	C5 MSC	C40280	C40280 MSC	C40280 MSC - BGLAP	MSC	BGLAP	3	C5M2	study-collection-qPCR-C5 - plate2	2020-10-06	Emilie Briscoe	34.5476	1.9307	30.6886	0.0980955	-1.00835	34.2791	0.869111	-0.0609246	30.6886	0.0837092	-1.07723	34.2791	0.495215	-0.305206	30.6886	0.090645	-1.04266	34.2791	0.656747	-0.182602
Sample	Sample Adipogenic	Chimpanzee	Chimpanzee Adipogenic	C5	C5 Adipogenic	C40280	C40280 Adipogenic	C40280 Adipogenic - BGLAP	Adipogenic	BGLAP	1	C5A2	study-collection-qPCR-C5 - plate2	2020-10-06	Emilie Briscoe	34.6831	1.9307	30.6886	0.522225	-0.282142	34.2791	4.62684	0.665284	30.6886	0.0880587	-1.05523	34.2791	0.520946	-0.283207	30.6886	0.215179	-0.667201	34.2791	1.55903	0.192854
Sample	Sample Adipogenic	Chimpanzee	Chimpanzee Adipogenic	C5	C5 Adipogenic	C40280	C40280 Adipogenic	C40280 Adipogenic - BGLAP	Adipogenic	BGLAP	2	C5A2	study-collection-qPCR-C5 - plate2	2020-10-06	Emilie Briscoe	34.717	1.9307	30.6886	0.43227	-0.364245	34.2791	3.82985	0.583181	30.6886	0.0927108	-1.03287	34.2791	0.548467	-0.260849	30.6886	0.200783	-0.697273	34.2791	1.45473	0.162782
Sample	Sample Adipogenic	Chimpanzee	Chimpanzee Adipogenic	C5	C5 Adipogenic	C40280	C40280 Adipogenic	C40280 Adipogenic - BGLAP	Adipogenic	BGLAP	3	C5A2	study-collection-qPCR-C5 - plate2	2020-10-06	Emilie Briscoe	34.9795	1.9307	30.6886	0.304312	-0.51668	34.2791	2.69616	0.430746	30.6886	0.0273709	-1.56271	34.2791	0.161924	-0.79069	30.6886	0.0916862	-1.0377	34.2791	0.664291	-0.177642
Sample	Sample Chondrogenic	Chimpanzee	Chimpanzee Chondrogenic	C5	C5 Chondrogenic	C40280	C40280 Chondrogenic	C40280 Chondrogenic - BGLAP	Chondrogenic	BGLAP	1	C5C2	study-collection-qPCR-C5 - plate2	2020-10-06	Emilie Briscoe	35.5943	1.9307	30.6886	0.271099	-0.566873	34.2791	2.40189	0.380554	30.6886	0.0933856	-1.02972	34.2791	0.552459	-0.2577	30.6886	0.15944	-0.797401	34.2791	1.15519	0.0626532
Sample	Sample Chondrogenic	Chimpanzee	Chimpanzee Chondrogenic	C5	C5 Chondrogenic	C40280	C40280 Chondrogenic	C40280 Chondrogenic - BGLAP	Chondrogenic	BGLAP	2	C5C2	study-collection-qPCR-C5 - plate2	2020-10-06	Emilie Briscoe	33.9533	1.9307	30.6886	0.388145	-0.411006	34.2791	3.4389	0.53642	30.6886	0.237887	-0.623628	34.2791	1.40732	0.148392	30.6886	0.304156	-0.516904	34.2791	2.20369	0.343151
Sample	Sample Chondrogenic	Chimpanzee	Chimpanzee Chondrogenic	C5	C5 Chondrogenic	C40280	C40280 Chondrogenic	C40280 Chondrogenic - BGLAP	Chondrogenic	BGLAP	3	C5C2	study-collection-qPCR-C5 - plate2	2020-10-06	Emilie Briscoe	Undetermined	1.9307	30.6886			34.2791			30.6886			34.2791			30.6886			34.2791
Sample	Sample Osteogenic	Chimpanzee	Chimpanzee Osteogenic	C5	C5 Osteogenic	C40280	C40280 Osteogenic	C40280 Osteogenic - BGLAP	Osteogenic	BGLAP	1	C5O2	study-collection-qPCR-C5 - plate2	2020-10-06	Emilie Briscoe	33.0278	1.9307	30.6886	1.85901	0.269282	34.2791	16.4706	1.21671	30.6886	0.553489	-0.256891	34.2791	3.27438	0.515129	30.6886	1.01675	0.00721252	34.2791	7.3666	0.867267
Sample	Sample Osteogenic	Chimpanzee	Chimpanzee Osteogenic	C5	C5 Osteogenic	C40280	C40280 Osteogenic	C40280 Osteogenic - BGLAP	Osteogenic	BGLAP	2	C5O2	study-collection-qPCR-C5 - plate2	2020-10-06	Emilie Briscoe	33.6372	1.9307	30.6886	1.28408	0.108594	34.2791	11.3768	1.05602	30.6886	0.349153	-0.456984	34.2791	2.06555	0.315036	30.6886	0.67127	-0.173103	34.2791	4.86353	0.686952
Sample	Sample Osteogenic	Chimpanzee	Chimpanzee Osteogenic	C5	C5 Osteogenic	C40280	C40280 Osteogenic	C40280 Osteogenic - BGLAP	Osteogenic	BGLAP	3	C5O2	study-collection-qPCR-C5 - plate2	2020-10-06	Emilie Briscoe	31.6769	1.9307	30.6886	3.17689	0.502002	34.2791	28.1468	1.44943	30.6886	1.06149	0.0259141	34.2791	6.27964	0.797934	30.6886	1.84025	0.264877	34.2791	13.3331	1.12493
Sample	Sample iPSC	Chimpanzee	Chimpanzee iPSC	C6	C6 iPSC	C3624	C3624 iPSC	C3624 iPSC - BGLAP	iPSC	BGLAP	1	C6I2	study-collection-qPCR-C6 - plate2	2020-10-21	Emilie Briscoe	32.9536	1.8723	32.3278	1.47386	0.168456	33.5145	5.27881	0.722536	32.3278	2.40258	0.380678	33.5145	3.3325	0.522771	32.3278	1.87256	0.272435	33.5145	4.21989	0.625301
Sample	Sample iPSC	Chimpanzee	Chimpanzee iPSC	C6	C6 iPSC	C3624	C3624 iPSC	C3624 iPSC - BGLAP	iPSC	BGLAP	2	C6I2	study-collection-qPCR-C6 - plate2	2020-10-21	Emilie Briscoe	32.3822	1.8723	32.3278	0.786297	-0.104414	33.5145	2.81622	0.449666	32.3278	0.689028	-0.161763	33.5145	0.955718	-0.0196703	32.3278	0.737037	-0.132511	33.5145	1.66094	0.220355
Sample	Sample iPSC	Chimpanzee	Chimpanzee iPSC	C6	C6 iPSC	C3624	C3624 iPSC	C3624 iPSC - BGLAP	iPSC	BGLAP	3	C6I2	study-collection-qPCR-C6 - plate2	2020-10-21	Emilie Briscoe	31.6478	1.8723	32.3278	0.862893	-0.0640428	33.5145	3.09056	0.490037	32.3278	0.604067	-0.218915	33.5145	0.837872	-0.0768225	32.3278	0.724562	-0.139924	33.5145	1.63283	0.212941
Sample	Sample MSC	Chimpanzee	Chimpanzee MSC	C6	C6 MSC	C3624	C3624 MSC	C3624 MSC - BGLAP	MSC	BGLAP	1	C6M2	study-collection-qPCR-C6 - plate2	2020-10-21	Emilie Briscoe	33.8115	1.8723	32.3278	0.45006	-0.346729	33.5145	1.61195	0.207351	32.3278	1.7828	0.251102	33.5145	2.47283	0.393195	32.3278	0.882132	-0.0544664	33.5145	1.98792	0.298399
Sample	Sample MSC	Chimpanzee	Chimpanzee MSC	C6	C6 MSC	C3624	C3624 MSC	C3624 MSC - BGLAP	MSC	BGLAP	2	C6M2	study-collection-qPCR-C6 - plate2	2020-10-21	Emilie Briscoe	33.2175	1.8723	32.3278	0.303673	-0.517593	33.5145	1.08764	0.0364866	32.3278	0.452292	-0.344581	33.5145	0.627353	-0.202488	32.3278	0.368788	-0.433223	33.5145	0.83108	-0.0803569
Sample	Sample MSC	Chimpanzee	Chimpanzee MSC	C6	C6 MSC	C3624	C3624 MSC	C3624 MSC - BGLAP	MSC	BGLAP	3	C6M2	study-collection-qPCR-C6 - plate2	2020-10-21	Emilie Briscoe	Undetermined	1.8723	32.3278			33.5145			32.3278			33.5145			32.3278			33.5145
Sample	Sample Adipogenic	Chimpanzee	Chimpanzee Adipogenic	C6	C6 Adipogenic	C3624	C3624 Adipogenic	C3624 Adipogenic - BGLAP	Adipogenic	BGLAP	1	C6A1	study-collection-qPCR-C6 - plate2	2020-10-21	Emilie Briscoe	35.335	1.8723	32.3278	0.327005	-0.485446	33.5145	1.17121	0.0686339	32.3278	0.112532	-0.948725	33.5145	0.156087	-0.806632	32.3278	0.194242	-0.711657	33.5145	0.437732	-0.358792
Sample	Sample Adipogenic	Chimpanzee	Chimpanzee Adipogenic	C6	C6 Adipogenic	C3624	C3624 Adipogenic	C3624 Adipogenic - BGLAP	Adipogenic	BGLAP	2	C6A1	study-collection-qPCR-C6 - plate2	2020-10-21	Emilie Briscoe	34.7049	1.8723	32.3278	0.12848	-0.891163	33.5145	0.460168	-0.337084	32.3278	0.0643512	-1.19144	33.5145	0.0892584	-1.04935	32.3278	0.0915974	-1.03812	33.5145	0.206419	-0.685251
Sample	Sample Adipogenic	Chimpanzee	Chimpanzee Adipogenic	C6	C6 Adipogenic	C3624	C3624 Adipogenic	C3624 Adipogenic - BGLAP	Adipogenic	BGLAP	3	C6A1	study-collection-qPCR-C6 - plate2	2020-10-21	Emilie Briscoe	34.2731	1.8723	32.3278	0.14629	-0.834784	33.5145	0.523957	-0.280705	32.3278	0.0880652	-1.0552	33.5145	0.122151	-0.913103	32.3278	0.114093	-0.942742	33.5145	0.257113	-0.589876
Sample	Sample Osteogenic	Chimpanzee	Chimpanzee Osteogenic	C6	C6 Osteogenic	C3624	C3624 Osteogenic	C3624 Osteogenic - BGLAP	Osteogenic	BGLAP	1	C6O2	study-collection-qPCR-C6 - plate2	2020-10-21	Emilie Briscoe	34.6717	1.8723	32.3278	0.853697	-0.0686962	33.5145	3.05762	0.485384	32.3278	0.379218	-0.421111	33.5145	0.525995	-0.279018	32.3278	0.574716	-0.240547	33.5145	1.29515	0.112319
Sample	Sample Osteogenic	Chimpanzee	Chimpanzee Osteogenic	C6	C6 Osteogenic	C3624	C3624 Osteogenic	C3624 Osteogenic - BGLAP	Osteogenic	BGLAP	2	C6O2	study-collection-qPCR-C6 - plate2	2020-10-21	Emilie Briscoe	Undetermined	1.8723	32.3278			33.5145			32.3278			33.5145			32.3278			33.5145
Sample	Sample Osteogenic	Chimpanzee	Chimpanzee Osteogenic	C6	C6 Osteogenic	C3624	C3624 Osteogenic	C3624 Osteogenic - BGLAP	Osteogenic	BGLAP	3	C6O2	study-collection-qPCR-C6 - plate2	2020-10-21	Emilie Briscoe	Undetermined	1.8723	32.3278			33.5145			32.3278			33.5145			32.3278			33.5145
Sample	Sample iPSC	Human	Human iPSC	H1	H1 iPSC	H23555	H23555 iPSC	H23555 iPSC - COL11A1	iPSC	COL11A1	1	H1I2	study-collection-qPCR-H1	2020-06-24	Emilie Briscoe	22.0854	2.62936							21.9574	1.21144	0.0833022	18.4116	0.0119828	-1.92144
Sample	Sample iPSC	Human	Human iPSC	H1	H1 iPSC	H23555	H23555 iPSC	H23555 iPSC - COL11A1	iPSC	COL11A1	2	H1I2	study-collection-qPCR-H1	2020-06-24	Emilie Briscoe	21.8294	2.62936							21.9574	1.00401	0.0017389	18.4116	0.00993107	-2.003
Sample	Sample MSC	Human	Human MSC	H1	H1 MSC	H23555	H23555 MSC	H23555 MSC - COL11A1	MSC	COL11A1	1	H1M2	study-collection-qPCR-H1	2020-06-24	Emilie Briscoe	18.526	2.62936							21.9574	121.273	2.08377	18.4116	1.19956	0.0790231
Sample	Sample MSC	Human	Human MSC	H1	H1 MSC	H23555	H23555 MSC	H23555 MSC - COL11A1	MSC	COL11A1	2	H1M2	study-collection-qPCR-H1	2020-06-24	Emilie Briscoe	18.2972	2.62936							21.9574	108.813	2.03668	18.4116	1.07631	0.0319378
Sample	Sample Adipogenic	Human	Human Adipogenic	H1	H1 Adipogenic	H23555	H23555 Adipogenic	H23555 Adipogenic - COL11A1	Adipogenic	COL11A1	1	H1A1	study-collection-qPCR-H1	2020-06-24	Emilie Briscoe	16.3455	2.62936							21.9574	377.975	2.57746	18.4116	3.7387	0.57272
Sample	Sample Adipogenic	Human	Human Adipogenic	H1	H1 Adipogenic	H23555	H23555 Adipogenic	H23555 Adipogenic - COL11A1	Adipogenic	COL11A1	2	H1A1	study-collection-qPCR-H1	2020-06-24	Emilie Briscoe	15.9651	2.62936							21.9574	370.061	2.56827	18.4116	3.66042	0.563531
Sample	Sample Chondrogenic	Human	Human Chondrogenic	H1	H1 Chondrogenic	H23555	H23555 Chondrogenic	H23555 Chondrogenic - COL11A1	Chondrogenic	COL11A1	1	H1C2	study-collection-qPCR-H1	2020-06-24	Emilie Briscoe	16.2736	2.62936							21.9574	485.207	2.68593	18.4116	4.79937	0.681184
Sample	Sample Chondrogenic	Human	Human Chondrogenic	H1	H1 Chondrogenic	H23555	H23555 Chondrogenic	H23555 Chondrogenic - COL11A1	Chondrogenic	COL11A1	2	H1C2	study-collection-qPCR-H1	2020-06-24	Emilie Briscoe	15.9768	2.62936							21.9574	397.863	2.59973	18.4116	3.93542	0.594991
Sample	Sample Chondrogenic	Human	Human Chondrogenic	H1	H1 Chondrogenic	H23555	H23555 Chondrogenic	H23555 Chondrogenic - COL11A1	Chondrogenic	COL11A1	3	H1C2	study-collection-qPCR-H1	2020-06-24	Emilie Briscoe	15.8502	2.62936							21.9574	309.115	2.49012	18.4116	3.05758	0.485378
Sample	Sample iPSC	Human	Human iPSC	H1-r2	H1-r2 iPSC	H23555	H23555 iPSC	H23555 iPSC - COL11A1	iPSC	COL11A1		H1Ir2	study-collection-qPCR-H1r - plate1	2020-10-26	Emilie Briscoe	22.6933	2.11721	22.3984	1.23994	0.0934011	18.1898	0.0641662	-1.19269	22.3984	1.84704	0.266476	18.1898	0.0694475	-1.15834	22.3984	1.50604	0.177838	18.1898	0.0667279	-1.17569
Sample	Sample iPSC	Human	Human iPSC	H1-r2	H1-r2 iPSC	H23555	H23555 iPSC	H23555 iPSC - COL11A1	iPSC	COL11A1		H1Ir2	study-collection-qPCR-H1r - plate1	2020-10-26	Emilie Briscoe	22.523	2.11721	22.3984	0.899686	-0.0459093	18.1898	0.0465582	-1.332	22.3984	0.695753	-0.157545	18.1898	0.0261599	-1.58236	22.3984	0.793867	-0.100252	18.1898	0.0351736	-1.45378
Sample	Sample iPSC	Human	Human iPSC	H1-r2	H1-r2 iPSC	H23555	H23555 iPSC	H23555 iPSC - COL11A1	iPSC	COL11A1		H1Ir2	study-collection-qPCR-H1r - plate1	2020-10-26	Emilie Briscoe	21.979	2.11721	22.3984	0.896413	-0.0474918	18.1898	0.0463889	-1.33359	22.3984	0.778161	-0.108931	18.1898	0.0292584	-1.53375	22.3984	0.836401	-0.0775852	18.1898	0.0370582	-1.43112
Sample	Sample MSC	Human	Human MSC	H1-r2	H1-r2 MSC	H23555	H23555 MSC	H23555 MSC - COL11A1	MSC	COL11A1		H1Mr2	study-collection-qPCR-H1r - plate1	2020-10-26	Emilie Briscoe	18.7995	2.11721	22.3984	23.448	1.37011	18.1898	1.21342	0.0840108	22.3984	28.7659	1.45888	18.1898	1.08158	0.0340591	22.3984	25.913	1.41352	18.1898	1.14812	0.0599868
Sample	Sample MSC	Human	Human MSC	H1-r2	H1-r2 MSC	H23555	H23555 MSC	H23555 MSC - COL11A1	MSC	COL11A1		H1Mr2	study-collection-qPCR-H1r - plate1	2020-10-26	Emilie Briscoe	17.9072	2.11721	22.3984	15.6467	1.19442	18.1898	0.809707	-0.0916723	22.3984	22.9953	1.36164	18.1898	0.864609	-0.0631801	22.3984	18.8598	1.27554	18.1898	0.835618	-0.0779923
Sample	Sample MSC	Human	Human MSC	H1-r2	H1-r2 MSC	H23555	H23555 MSC	H23555 MSC - COL11A1	MSC	COL11A1		H1Mr2	study-collection-qPCR-H1r - plate1	2020-10-26	Emilie Briscoe	17.8627	2.11721	22.3984	19.6678	1.29376	18.1898	1.0178	0.0076615	22.3984	28.4407	1.45394	18.1898	1.06935	0.0291211	22.3984	23.5253	1.37154	18.1898	1.04233	0.0180054
Sample	Sample Adipogenic	Human	Human Adipogenic	H1-r2	H1-r2 Adipogenic	H23555	H23555 Adipogenic	H23555 Adipogenic - COL11A1	Adipogenic	COL11A1		H1Ar2	study-collection-qPCR-H1r - plate1	2020-10-26	Emilie Briscoe	17.0694	2.11721	22.3984	48.2078	1.68312	18.1898	2.49473	0.397023	22.3984	167.987	2.22527	18.1898	6.3162	0.800456	22.3984	88.502	1.94695	18.1898	3.92123	0.593423
Sample	Sample Adipogenic	Human	Human Adipogenic	H1-r2	H1-r2 Adipogenic	H23555	H23555 Adipogenic	H23555 Adipogenic - COL11A1	Adipogenic	COL11A1		H1Ar2	study-collection-qPCR-H1r - plate1	2020-10-26	Emilie Briscoe	15.8784	2.11721	22.3984	75.2792	1.87667	18.1898	3.89565	0.59058	22.3984	95.3549	1.97934	18.1898	3.58529	0.554524	22.3984	84.41	1.92639	18.1898	3.73993	0.572864
Sample	Sample Adipogenic	Human	Human Adipogenic	H1-r2	H1-r2 Adipogenic	H23555	H23555 Adipogenic	H23555 Adipogenic - COL11A1	Adipogenic	COL11A1		H1Ar2	study-collection-qPCR-H1r - plate1	2020-10-26	Emilie Briscoe	15.8163	2.11721	22.3984	70.9577	1.851	18.1898	3.67202	0.564905	22.3984	210.889	2.32405	18.1898	7.92928	0.899234	22.3984	120.491	2.08095	18.1898	5.33854	0.727423
Sample	Sample Chondrogenic	Human	Human Chondrogenic	H1-r2	H1-r2 Chondrogenic	H23555	H23555 Chondrogenic	H23555 Chondrogenic - COL11A1	Chondrogenic	COL11A1		H1Cr2	study-collection-qPCR-H1r - plate1	2020-10-26	Emilie Briscoe	27.9098	2.11721	22.3984	3.1562	0.499164	18.1898	0.163331	-0.78693	22.3984	4.37395	0.640873	18.1898	0.164458	-0.783946	22.3984	3.71955	0.57049	18.1898	0.164801	-0.78304
Sample	Sample Chondrogenic	Human	Human Chondrogenic	H1-r2	H1-r2 Chondrogenic	H23555	H23555 Chondrogenic	H23555 Chondrogenic - COL11A1	Chondrogenic	COL11A1		H1Cr2	study-collection-qPCR-H1r - plate1	2020-10-26	Emilie Briscoe	28.2731	2.11721	22.3984	5.60271	0.748398	18.1898	0.289937	-0.537696	22.3984	3.60799	0.557265	18.1898	0.135658	-0.867554	22.3984	4.55086	0.658093	18.1898	0.201634	-0.695437
Sample	Sample Chondrogenic	Human	Human Chondrogenic	H1-r2	H1-r2 Chondrogenic	H23555	H23555 Chondrogenic	H23555 Chondrogenic - COL11A1	Chondrogenic	COL11A1		H1Cr2	study-collection-qPCR-H1r - plate1	2020-10-26	Emilie Briscoe	28.8077	2.11721	22.3984	4.29287	0.632748	18.1898	0.222154	-0.653347	22.3984	3.85647	0.58619	18.1898	0.145001	-0.838629	22.3984	4.10084	0.612873	18.1898	0.181695	-0.740657
Sample	Sample Osteogenic	Human	Human Osteogenic	H1-r2	H1-r2 Osteogenic	H23555	H23555 Osteogenic	H23555 Osteogenic - COL11A1	Osteogenic	COL11A1		H1Or2	study-collection-qPCR-H1r - plate1	2020-10-26	Emilie Briscoe	16.4556	2.11721	22.3984	156.833	2.19544	18.1898	8.11603	0.909344	22.3984	133.864	2.12666	18.1898	5.03321	0.701845	22.3984	145.288	2.16223	18.1898	6.43722	0.808699
Sample	Sample Osteogenic	Human	Human Osteogenic	H1-r2	H1-r2 Osteogenic	H23555	H23555 Osteogenic	H23555 Osteogenic - COL11A1	Osteogenic	COL11A1		H1Or2	study-collection-qPCR-H1r - plate1	2020-10-26	Emilie Briscoe	16.8732	2.11721	22.3984	67.8386	1.83148	18.1898	3.51061	0.545383	22.3984	53.105	1.72514	18.1898	1.99672	0.300317	22.3984	60.2211	1.77975	18.1898	2.6682	0.426219
Sample	Sample Osteogenic	Human	Human Osteogenic	H1-r2	H1-r2 Osteogenic	H23555	H23555 Osteogenic	H23555 Osteogenic - COL11A1	Osteogenic	COL11A1		H1Or2	study-collection-qPCR-H1r - plate1	2020-10-26	Emilie Briscoe	16.6816	2.11721	22.3984	82.29	1.91535	18.1898	4.25846	0.629253	22.3984	82.8821	1.91846	18.1898	3.11632	0.493641	22.3984	82.588	1.91692	18.1898	3.6592	0.563386
Sample	Sample iPSC	Human	Human iPSC	H2	H2 iPSC	H20157	H20157 iPSC	H20157 iPSC - COL11A1	iPSC	COL11A1	1	H2I2	study-collection-qPCR-H2 - plate1	2020-07-28	Emilie Briscoe	23.8878	2.65602	23.854	1.18852	0.0750076	21.6534	0.561833	-0.250393	23.854	1.19863	0.0786847	21.6534	0.153792	-0.813067	23.854	1.19476	0.0772796	21.6534	0.28509	-0.545017
Sample	Sample iPSC	Human	Human iPSC	H2	H2 iPSC	H20157	H20157 iPSC	H20157 iPSC - COL11A1	iPSC	COL11A1	2	H2I2	study-collection-qPCR-H2 - plate1	2020-07-28	Emilie Briscoe	23.4474	2.65602	23.854	1.20921	0.0825004	21.6534	0.57161	-0.2429	23.854	1.3708	0.136974	21.6534	0.175883	-0.754777	23.854	1.29104	0.110941	21.6534	0.308066	-0.511356
Sample	Sample iPSC	Human	Human iPSC	H2	H2 iPSC	H20157	H20157 iPSC	H20157 iPSC - COL11A1	iPSC	COL11A1	3	H2I2	study-collection-qPCR-H2 - plate1	2020-07-28	Emilie Briscoe	24.2267	2.65602	23.854	0.695812	-0.157508	21.6534	0.328921	-0.482908	23.854	0.608613	-0.215659	21.6534	0.0780891	-1.10741	23.854	0.648305	-0.18822	21.6534	0.154697	-0.810517
Sample	Sample MSC	Human	Human MSC	H2	H2 MSC	H20157	H20157 MSC	H20157 MSC - COL11A1	MSC	COL11A1	1	H2M2	study-collection-qPCR-H2 - plate1	2020-07-28	Emilie Briscoe	21.8932	2.65602	23.854	2.17231	0.336922	21.6534	1.02688	0.0115217	23.854	9.10729	0.959389	21.6534	1.16853	0.0676381	23.854	4.61187	0.663877	21.6534	1.10047	0.0415799
Sample	Sample MSC	Human	Human MSC	H2	H2 MSC	H20157	H20157 MSC	H20157 MSC - COL11A1	MSC	COL11A1	2	H2M2	study-collection-qPCR-H2 - plate1	2020-07-28	Emilie Briscoe	21.2249	2.65602	23.854	2.48264	0.394913	21.6534	1.17358	0.069513	23.854	7.71836	0.887525	21.6534	0.990317	-0.00422592	23.854	4.49208	0.652447	21.6534	1.07189	0.0301505
Sample	Sample MSC	Human	Human MSC	H2	H2 MSC	H20157	H20157 MSC	H20157 MSC - COL11A1	MSC	COL11A1	3	H2M2	study-collection-qPCR-H2 - plate1	2020-07-28	Emilie Briscoe	21.842	2.65602	23.854	1.75536	0.244366	21.6534	0.829784	-0.0810347	23.854	6.73502	0.828339	21.6534	0.864147	-0.0634122	23.854	3.55277	0.550567	21.6534	0.847753	-0.0717304
Sample	Sample Adipogenic	Human	Human Adipogenic	H2	H2 Adipogenic	H20157	H20157 Adipogenic	H20157 Adipogenic - COL11A1	Adipogenic	COL11A1	1	H2A2	study-collection-qPCR-H2 - plate1	2020-07-28	Emilie Briscoe	16.915	2.65602	23.854	668.795	2.82529	21.6534	316.15	2.49989	23.854	1635.57	3.21367	21.6534	209.854	2.32192	23.854	1071.5	3.02999	21.6534	255.679	2.4077
Sample	Sample Adipogenic	Human	Human Adipogenic	H2	H2 Adipogenic	H20157	H20157 Adipogenic	H20157 Adipogenic - COL11A1	Adipogenic	COL11A1	2	H2A2	study-collection-qPCR-H2 - plate1	2020-07-28	Emilie Briscoe	16.8052	2.65602	23.854	697.874	2.84378	21.6534	329.896	2.51838	23.854	1903.66	3.27959	21.6534	244.252	2.38784	23.854	1184.21	3.07343	21.6534	282.573	2.45113
Sample	Sample Adipogenic	Human	Human Adipogenic	H2	H2 Adipogenic	H20157	H20157 Adipogenic	H20157 Adipogenic - COL11A1	Adipogenic	COL11A1	3	H2A2	study-collection-qPCR-H2 - plate1	2020-07-28	Emilie Briscoe	16.445	2.65602	23.854	1176.09	3.07044	21.6534	555.957	2.74504	23.854	2245.63	3.35134	21.6534	288.13	2.45959	23.854	1654.02	3.21854	21.6534	394.679	2.59624
Sample	Sample Chondrogenic	Human	Human Chondrogenic	H2	H2 Chondrogenic	H20157	H20157 Chondrogenic	H20157 Chondrogenic - COL11A1	Chondrogenic	COL11A1	1	H2C2	study-collection-qPCR-H2 - plate1	2020-07-28	Emilie Briscoe	23.2658	2.65602	23.854	26.6676	1.42598	21.6534	12.6062	1.10058	23.854	83.4059	1.9212	21.6534	10.7015	1.02945	23.854	49.1918	1.69189	21.6534	11.7381	1.0696
Sample	Sample Chondrogenic	Human	Human Chondrogenic	H2	H2 Chondrogenic	H20157	H20157 Chondrogenic	H20157 Chondrogenic - COL11A1	Chondrogenic	COL11A1	2	H2C2	study-collection-qPCR-H2 - plate1	2020-07-28	Emilie Briscoe	22.7079	2.65602	23.854	48.6359	1.68696	21.6534	22.9909	1.36156	23.854	77.597	1.88984	21.6534	9.9562	0.998094	23.854	62.8858	1.79855	21.6534	15.0057	1.17626
Sample	Sample Chondrogenic	Human	Human Chondrogenic	H2	H2 Chondrogenic	H20157	H20157 Chondrogenic	H20157 Chondrogenic - COL11A1	Chondrogenic	COL11A1	3	H2C2	study-collection-qPCR-H2 - plate1	2020-07-28	Emilie Briscoe	23.0949	2.65602	23.854	35.1032	1.54535	21.6534	16.5938	1.21995	23.854	45.1156	1.65433	21.6534	5.78862	0.762575	23.854	40.4971	1.60742	21.6534	9.66333	0.985127
Sample	Sample Osteogenic	Human	Human Osteogenic	H2	H2 Osteogenic	H20157	H20157 Osteogenic	H20157 Osteogenic - COL11A1	Osteogenic	COL11A1	1	H2O2	study-collection-qPCR-H2 - plate1	2020-07-28	Emilie Briscoe	17.4557	2.65602	23.854	2088.59	3.31985	21.6534	987.309	2.99445	23.854	1572.45	3.19658	21.6534	201.756	2.30483	23.854	1807.07	3.25698	21.6534	431.2	2.63468
Sample	Sample Osteogenic	Human	Human Osteogenic	H2	H2 Osteogenic	H20157	H20157 Osteogenic	H20157 Osteogenic - COL11A1	Osteogenic	COL11A1	2	H2O2	study-collection-qPCR-H2 - plate1	2020-07-28	Emilie Briscoe	16.9122	2.65602	23.854	807.877	2.90735	21.6534	381.896	2.58194	23.854	932.199	2.96951	21.6534	119.607	2.07776	23.854	871.045	2.94004	21.6534	207.847	2.31774
Sample	Sample Osteogenic	Human	Human Osteogenic	H2	H2 Osteogenic	H20157	H20157 Osteogenic	H20157 Osteogenic - COL11A1	Osteogenic	COL11A1	3	H2O2	study-collection-qPCR-H2 - plate1	2020-07-28	Emilie Briscoe	17.4494	2.65602	23.854	654.498	2.81591	21.6534	309.391	2.49051	23.854	463.745	2.66628	21.6534	59.5016	1.77453	23.854	546.06	2.73724	21.6534	130.3	2.11494
Sample	Sample iPSC	Human	Human iPSC	H3	H3 iPSC	H28126	H28126 iPSC	H28126 iPSC - COL11A1	iPSC	COL11A1	1	H3I2	study-collection-qPCR-H3 - plate1	2020-08-26	Emilie Briscoe	22.7641	2.09634	22.5317	1.28641	0.109378	18.655	0.0752117	-1.12371	22.5317	1.11442	0.0470478	18.655	0.0655547	-1.1834	22.5317	1.19555	0.0775672	18.655	0.0701204	-1.15416
Sample	Sample iPSC	Human	Human iPSC	H3	H3 iPSC	H28126	H28126 iPSC	H28126 iPSC - COL11A1	iPSC	COL11A1	2	H3I2	study-collection-qPCR-H3 - plate1	2020-08-26	Emilie Briscoe	22.5633	2.09634	22.5317	0.830617	-0.0805992	18.655	0.0485633	-1.31369	22.5317	0.893063	-0.0491177	18.655	0.0525337	-1.27956	22.5317	0.86196	-0.064513	18.655	0.050555	-1.29624
Sample	Sample iPSC	Human	Human iPSC	H3	H3 iPSC	H28126	H28126 iPSC	H28126 iPSC - COL11A1	iPSC	COL11A1	3	H3I2	study-collection-qPCR-H3 - plate1	2020-08-26	Emilie Briscoe	22.2677	2.09634	22.5317	0.935882	-0.0287789	18.655	0.0547178	-1.26187	22.5317	1.00478	0.00206996	18.655	0.0591052	-1.22837	22.5317	0.970389	-0.0130542	18.655	0.0569145	-1.24478
Sample	Sample MSC	Human	Human MSC	H3	H3 MSC	H28126	H28126 MSC	H28126 MSC - COL11A1	MSC	COL11A1	1	H3M1	study-collection-qPCR-H3 - plate1	2020-08-26	Emilie Briscoe	19.3213	2.09634	22.5317	18.0971	1.25761	18.655	1.05808	0.0245166	22.5317	17.2459	1.23669	18.655	1.01448	0.00624287	22.5317	17.6633	1.24707	18.655	1.03597	0.0153488
Sample	Sample MSC	Human	Human MSC	H3	H3 MSC	H28126	H28126 MSC	H28126 MSC - COL11A1	MSC	COL11A1	2	H3M1	study-collection-qPCR-H3 - plate1	2020-08-26	Emilie Briscoe	18.5057	2.09634	22.5317	16.8946	1.22775	18.655	0.987767	-0.00534562	22.5317	16.7033	1.2228	18.655	0.982558	-0.00764188	22.5317	16.794	1.22515	18.655	0.984988	-0.00656907
Sample	Sample MSC	Human	Human MSC	H3	H3 MSC	H28126	H28126 MSC	H28126 MSC - COL11A1	MSC	COL11A1	3	H3M1	study-collection-qPCR-H3 - plate1	2020-08-26	Emilie Briscoe	18.1381	2.09634	22.5317	16.3652	1.21392	18.655	0.956817	-0.019171	22.5317	17.0547	1.23184	18.655	1.00323	0.001399	22.5317	16.7087	1.22294	18.655	0.979987	-0.00877972
Sample	Sample Adipogenic	Human	Human Adipogenic	H3	H3 Adipogenic	H28126	H28126 Adipogenic	H28126 Adipogenic - COL11A1	Adipogenic	COL11A1	1	H3A1	study-collection-qPCR-H3 - plate1	2020-08-26	Emilie Briscoe	21.6526	2.09634	22.5317	6.745	0.828982	18.655	0.394357	-0.404111	22.5317	27.6922	1.44236	18.655	1.62897	0.211913	22.5317	13.933	1.14404	18.655	0.817187	-0.0876786
Sample	Sample Adipogenic	Human	Human Adipogenic	H3	H3 Adipogenic	H28126	H28126 Adipogenic	H28126 Adipogenic - COL11A1	Adipogenic	COL11A1	2	H3A1	study-collection-qPCR-H3 - plate1	2020-08-26	Emilie Briscoe	21.3452	2.09634	22.5317	2.69375	0.430357	18.655	0.157494	-0.802736	22.5317	9.17652	0.962678	18.655	0.539801	-0.267766	22.5317	5.05151	0.703421	18.655	0.296277	-0.528302
Sample	Sample Adipogenic	Human	Human Adipogenic	H3	H3 Adipogenic	H28126	H28126 Adipogenic	H28126 Adipogenic - COL11A1	Adipogenic	COL11A1	3	H3A1	study-collection-qPCR-H3 - plate1	2020-08-26	Emilie Briscoe	20.8066	2.09634	22.5317	2.9723	0.473092	18.655	0.17378	-0.760001	22.5317	8.90625	0.949695	18.655	0.523903	-0.280749	22.5317	5.21756	0.717467	18.655	0.306016	-0.514256
Sample	Sample Osteogenic	Human	Human Osteogenic	H3	H3 Osteogenic	H28126	H28126 Osteogenic	H28126 Osteogenic - COL11A1	Osteogenic	COL11A1	1	H3O2	study-collection-qPCR-H3 - plate1	2020-08-26	Emilie Briscoe	19.6754	2.09634	22.5317	12.971	1.11297	18.655	0.758369	-0.120119	22.5317	22.7092	1.3562	18.655	1.33585	0.125757	22.5317	17.2938	1.23789	18.655	1.0143	0.00616647
Sample	Sample Osteogenic	Human	Human Osteogenic	H3	H3 Osteogenic	H28126	H28126 Osteogenic	H28126 Osteogenic - COL11A1	Osteogenic	COL11A1	2	H3O2	study-collection-qPCR-H3 - plate1	2020-08-26	Emilie Briscoe	18.956	2.09634	22.5317	11.1529	1.04739	18.655	0.652072	-0.185705	22.5317	19.4743	1.28946	18.655	1.14556	0.059017	22.5317	14.8408	1.17146	18.655	0.870431	-0.0602654
Sample	Sample Osteogenic	Human	Human Osteogenic	H3	H3 Osteogenic	H28126	H28126 Osteogenic	H28126 Osteogenic - COL11A1	Osteogenic	COL11A1	3	H3O2	study-collection-qPCR-H3 - plate1	2020-08-26	Emilie Briscoe	18.1854	2.09634	22.5317	12.0203	1.07992	18.655	0.702787	-0.153177	22.5317	30.2647	1.48094	18.655	1.78029	0.250492	22.5317	19.2896	1.28532	18.655	1.13136	0.0536005
Sample	Sample iPSC	Human	Human iPSC	H4	H4 iPSC	H28834	H28834 iPSC	H28834 iPSC - COL11A1	iPSC	COL11A1	1	H4I2	study-collection-qPCR-H4 - plate1	2020-09-11	Emilie Briscoe	23.7346	2.1612	23.2339	1.16277	0.0654927	17.2997	0.0101644	-1.99292	23.2339	0.817858	-0.0873221	17.2997	0.00233363	-2.63197	23.2339	0.968022	-0.0141149	17.2997	0.00469465	-2.3284
Sample	Sample iPSC	Human	Human iPSC	H4	H4 iPSC	H28834	H28834 iPSC	H28834 iPSC - COL11A1	iPSC	COL11A1	2	H4I2	study-collection-qPCR-H4 - plate1	2020-09-11	Emilie Briscoe	23.1682	2.1612	23.2339	0.827648	-0.0821542	17.2997	0.00723494	-2.14056	23.2339	1.06188	0.0260763	17.2997	0.00302991	-2.51857	23.2339	0.942801	-0.0255799	17.2997	0.00457233	-2.33986
Sample	Sample iPSC	Human	Human iPSC	H4	H4 iPSC	H28834	H28834 iPSC	H28834 iPSC - COL11A1	iPSC	COL11A1	3	H4I2	study-collection-qPCR-H4 - plate1	2020-09-11	Emilie Briscoe	22.7988	2.1612	23.2339	1.03911	0.0166615	17.2997	0.00908345	-2.04175	23.2339	1.15145	0.0612458	17.2997	0.00328548	-2.4834	23.2339	1.09571	0.0396947	17.2997	0.00531389	-2.27459
Sample	Sample MSC	Human	Human MSC	H4	H4 MSC	H28834	H28834 MSC	H28834 MSC - COL11A1	MSC	COL11A1	1	H4M2	study-collection-qPCR-H4 - plate1	2020-09-11	Emilie Briscoe	18.0002	2.1612	23.2339	73.9309	1.86883	17.2997	0.646271	-0.189585	23.2339	282.585	2.45115	17.2997	0.806313	-0.0934966	23.2339	149.747	2.17536	17.2997	0.726233	-0.138924
Sample	Sample MSC	Human	Human MSC	H4	H4 MSC	H28834	H28834 MSC	H28834 MSC - COL11A1	MSC	COL11A1	2	H4M2	study-collection-qPCR-H4 - plate1	2020-09-11	Emilie Briscoe	17.268	2.1612	23.2339	120.181	2.07984	17.2997	1.05057	0.0214267	23.2339	440.025	2.64348	17.2997	1.25554	0.0988308	23.2339	237.924	2.37644	17.2997	1.15387	0.0621568
Sample	Sample MSC	Human	Human MSC	H4	H4 MSC	H28834	H28834 MSC	H28834 MSC - COL11A1	MSC	COL11A1	3	H4M2	study-collection-qPCR-H4 - plate1	2020-09-11	Emilie Briscoe	16.6309	2.1612	23.2339	168.488	2.22657	17.2997	1.47285	0.168158	23.2339	346.188	2.53931	17.2997	0.987793	-0.0053342	23.2339	246.065	2.39105	17.2997	1.19335	0.0767671
Sample	Sample Adipogenic	Human	Human Adipogenic	H4	H4 Adipogenic	H28834	H28834 Adipogenic	H28834 Adipogenic - COL11A1	Adipogenic	COL11A1	1	H4A2	study-collection-qPCR-H4 - plate1	2020-09-11	Emilie Briscoe	16.2377	2.1612	23.2339	897.775	2.95317	17.2997	7.84795	0.894756	23.2339	1093.04	3.03864	17.2997	3.11883	0.493992	23.2339	1000.08	3.00004	17.2997	4.85014	0.685754
Sample	Sample Adipogenic	Human	Human Adipogenic	H4	H4 Adipogenic	H28834	H28834 Adipogenic	H28834 Adipogenic - COL11A1	Adipogenic	COL11A1	2	H4A2	study-collection-qPCR-H4 - plate1	2020-09-11	Emilie Briscoe	16.5309	2.1612	23.2339	382.31	2.58242	17.2997	3.34199	0.524005	23.2339	687.765	2.83744	17.2997	1.96243	0.292793	23.2339	521.877	2.71757	17.2997	2.53096	0.403286
Sample	Sample Adipogenic	Human	Human Adipogenic	H4	H4 Adipogenic	H28834	H28834 Adipogenic	H28834 Adipogenic - COL11A1	Adipogenic	COL11A1	3	H4A2	study-collection-qPCR-H4 - plate1	2020-09-11	Emilie Briscoe	16.1361	2.1612	23.2339	427.949	2.63139	17.2997	3.74094	0.572981	23.2339	767.778	2.88524	17.2997	2.19073	0.340589	23.2339	582.989	2.76566	17.2997	2.82734	0.451378
Sample	Sample Chondrogenic	Human	Human Chondrogenic	H4	H4 Chondrogenic	H28834	H28834 Chondrogenic	H28834 Chondrogenic - COL11A1	Chondrogenic	COL11A1	1	H4C2	study-collection-qPCR-H4 - plate1	2020-09-11	Emilie Briscoe	20.9933	2.1612	23.2339	38.0187	1.58	17.2997	0.332343	-0.478414	23.2339	64.7221	1.81105	17.2997	0.184674	-0.733594	23.2339	50.5939	1.7041	17.2997	0.245367	-0.610184
Sample	Sample Chondrogenic	Human	Human Chondrogenic	H4	H4 Chondrogenic	H28834	H28834 Chondrogenic	H28834 Chondrogenic - COL11A1	Chondrogenic	COL11A1	2	H4C2	study-collection-qPCR-H4 - plate1	2020-09-11	Emilie Briscoe	20.9817	2.1612	23.2339	25.4405	1.40553	17.2997	0.22239	-0.652885	23.2339	37.2189	1.57076	17.2997	0.106198	-0.973883	23.2339	31.2219	1.49446	17.2997	0.151418	-0.819822
Sample	Sample Chondrogenic	Human	Human Chondrogenic	H4	H4 Chondrogenic	H28834	H28834 Chondrogenic	H28834 Chondrogenic - COL11A1	Chondrogenic	COL11A1	3	H4C2	study-collection-qPCR-H4 - plate1	2020-09-11	Emilie Briscoe	20.8734	2.1612	23.2339	25.7538	1.41084	17.2997	0.225128	-0.64757	23.2339	31.4862	1.49812	17.2997	0.0898408	-1.04653	23.2339	28.7534	1.45869	17.2997	0.139446	-0.855592
Sample	Sample Osteogenic	Human	Human Osteogenic	H4	H4 Osteogenic	H28834	H28834 Osteogenic	H28834 Osteogenic - COL11A1	Osteogenic	COL11A1	1	H4O2	study-collection-qPCR-H4 - plate1	2020-09-11	Emilie Briscoe	17.1863	2.1612	23.2339	678.748	2.83171	17.2997	5.93332	0.773298	23.2339	350.915	2.5452	17.2997	1.00128	0.000555059	23.2339	482.643	2.68363	17.2997	2.34069	0.369344
Sample	Sample Osteogenic	Human	Human Osteogenic	H4	H4 Osteogenic	H28834	H28834 Osteogenic	H28834 Osteogenic - COL11A1	Osteogenic	COL11A1	2	H4O2	study-collection-qPCR-H4 - plate1	2020-09-11	Emilie Briscoe	17.0538	2.1612	23.2339	488.991	2.6893	17.2997	4.27455	0.63089	23.2339	366.687	2.5643	17.2997	1.04628	0.019649	23.2339	422.221	2.62554	17.2997	2.04766	0.311257
Sample	Sample Osteogenic	Human	Human Osteogenic	H4	H4 Osteogenic	H28834	H28834 Osteogenic	H28834 Osteogenic - COL11A1	Osteogenic	COL11A1	3	H4O2	study-collection-qPCR-H4 - plate1	2020-09-11	Emilie Briscoe	16.9776	2.1612	23.2339	411.058	2.6139	17.2997	3.59329	0.555493	23.2339	287.83	2.45914	17.2997	0.821276	-0.0855106	23.2339	342.118	2.53418	17.2997	1.65918	0.219893
Sample	Sample iPSC	Human	Human iPSC	H5	H5 iPSC	H21792	H21792 iPSC	H21792 iPSC - COL11A1	iPSC	COL11A1	1	H5I2	study-collection-qPCR-H5 - plate1	2020-09-25	Emilie Briscoe	23.8011	2.15919	23.3169	1.65266	0.218184	19.48	0.0908602	-1.04163	23.3169	1.07973	0.0333139	19.48	0.0286213	-1.54331	23.3169	1.3408	0.127363	19.48	0.0514855	-1.28832
Sample	Sample iPSC	Human	Human iPSC	H5	H5 iPSC	H21792	H21792 iPSC	H21792 iPSC - COL11A1	iPSC	COL11A1	2	H5I2	study-collection-qPCR-H5 - plate1	2020-09-25	Emilie Briscoe	23.4489	2.15919	23.3169	0.570688	-0.243601	19.48	0.0313754	-1.50341	23.3169	0.875485	-0.0577512	19.48	0.0232073	-1.63438	23.3169	0.704315	-0.152233	19.48	0.0270451	-1.56791
Sample	Sample iPSC	Human	Human iPSC	H5	H5 iPSC	H21792	H21792 iPSC	H21792 iPSC - COL11A1	iPSC	COL11A1	3	H5I2	study-collection-qPCR-H5 - plate1	2020-09-25	Emilie Briscoe	22.7007	2.15919	23.3169	1.06027	0.0254174	19.48	0.0582918	-1.23439	23.3169	1.05788	0.0244372	19.48	0.0280422	-1.55219	23.3169	1.05894	0.0248698	19.48	0.0406622	-1.39081
Sample	Sample MSC	Human	Human MSC	H5	H5 MSC	H21792	H21792 MSC	H21792 MSC - COL11A1	MSC	COL11A1	1	H5M2	study-collection-qPCR-H5 - plate1	2020-09-25	Emilie Briscoe	20.9417	2.15919	23.3169	6.24296	0.79539	19.48	0.343226	-0.46442	23.3169	24.6226	1.39133	19.48	0.652695	-0.18529	23.3169	12.2632	1.0886	19.48	0.470896	-0.327075
Sample	Sample MSC	Human	Human MSC	H5	H5 MSC	H21792	H21792 MSC	H21792 MSC - COL11A1	MSC	COL11A1	2	H5M2	study-collection-qPCR-H5 - plate1	2020-09-25	Emilie Briscoe	18.8207	2.15919	23.3169	19.5861	1.29195	19.48	1.07681	0.0321386	23.3169	45.3719	1.65679	19.48	1.20271	0.0801621	23.3169	29.6058	1.47138	19.48	1.13684	0.0556986
Sample	Sample MSC	Human	Human MSC	H5	H5 MSC	H21792	H21792 MSC	H21792 MSC - COL11A1	MSC	COL11A1	3	H5M2	study-collection-qPCR-H5 - plate1	2020-09-25	Emilie Briscoe	18.6778	2.15919	23.3169	49.2143	1.69209	19.48	2.70571	0.432281	23.3169	48.0565	1.68175	19.48	1.27388	0.105128	23.3169	48.6469	1.68706	19.48	1.868	0.271377
Sample	Sample Osteogenic	Human	Human Osteogenic	H5	H5 Osteogenic	H21792	H21792 Osteogenic	H21792 Osteogenic - COL11A1	Osteogenic	COL11A1	1	H5O2	study-collection-qPCR-H5 - plate1	2020-09-25	Emilie Briscoe	21.0725	2.15919	23.3169	36.6483	1.56405	19.48	2.01486	0.304244	23.3169	31.2365	1.49466	19.48	0.828013	-0.0819627	23.3169	33.9006	1.53021	19.48	1.30175	0.114529
Sample	Sample Osteogenic	Human	Human Osteogenic	H5	H5 Osteogenic	H21792	H21792 Osteogenic	H21792 Osteogenic - COL11A1	Osteogenic	COL11A1	2	H5O2	study-collection-qPCR-H5 - plate1	2020-09-25	Emilie Briscoe	20.536	2.15919	23.3169	29.9669	1.47664	19.48	1.64752	0.216832	23.3169	37.9081	1.57873	19.48	1.00486	0.00210748	23.3169	33.6565	1.52707	19.48	1.29238	0.111391
Sample	Sample Osteogenic	Human	Human Osteogenic	H5	H5 Osteogenic	H21792	H21792 Osteogenic	H21792 Osteogenic - COL11A1	Osteogenic	COL11A1	3	H5O2	study-collection-qPCR-H5 - plate1	2020-09-25	Emilie Briscoe	19.9164	2.15919	23.3169	42.0152	1.62341	19.48	2.30992	0.363597	23.3169	34.8077	1.54168	19.48	0.922679	-0.0349492	23.3169	38.3151	1.58337	19.48	1.47127	0.167692
[truncated: 2,601 more rows]
