# Supplementary material for: Evolutionary insights into primate skeletal gene regulation using a comparative cell culture model
Source: PLoS Genet. 2022 Mar 9;18(3):e1010073. doi: 10.1371/journal.pgen.1010073 (PMC8936463; doi:10.1371/journal.pgen.1010073)
Supplement: S9 Table — Additional descriptions for each column heading are provided in S9 Table (labels). (XLSX) [file pgen.1010073.s010.xlsx]

## Sheet: S9 Table
Pooled_Sample_Name	Differentiation_Replicate	Differentiation_Batch	Cell_Type	Sample_Name_at_Core	Human_Sample_in_Pool	Human_Individual_in_Pool	Human_Sex_in_Pool	Human_Age_in_Pool	Chimp_Sample_in_Pool	Chimp_Individual_in_Pool	Chimp_Sex_in_Pool	Chimp_Age_in_Pool	Date_of_10X_Collection	Number_of_6wells_Used_Human	10X_Cell_Count_Prewash_Human	10X_Cell_Viability_Prewash_Human	10X_Cell_Count_Postwash_Human	10X_Cell_Viability_Postwash_Human	10X_Cell_Multiplication_Factor_for_Mixture_Human	10X_Cell_Volume_for_Mixture_Human	Number_of_6wells_Used_Chimp	10X_Cell_Count_Prewash_Chimp	10X_Cell_Viability_Prewash_Chimp	10X_Cell_Count_Postwash_Chimp	10X_Cell_Viability_Postwash_Chimp	10X_Cell_Multiplication_Factor_for_Mixture_Chimp	10X_Cell_Volume_for_Mixture_Chimp	10X_Cell_Count_Postwash_Postmix	10X_Cell_Viability_Postwash_Postmix	Targeted_Cell_Recovery	Date_of_10X_cDNA_Synthesis	10X_cDNA_Concentration_pg/uL	10X_cDNA_Average_Size_bp	Date_of_10X_Library_Prep	10X_Library_Concentration_pg/uL	10X_Library_Average_Size_bp	10X_Sequencing_Batch	10X_Sequencing_Lanes
1-I	1	1	iPSC	GHO-1	H1-I	H23555	M	22	C1-I	C8861	M	16	2019-06-03	3	9228000	0.89	700000	0.9	300	429	3	28560000	0.95	565000	0.9	300	531	650000	0.9	5000	2019-06-03	8087.78	1525	2019-06-10	5819.26	482	1	4
1-M	1	1	MSC	GHO-2	H1-M	H23555	M	22	C1-M	C8861	M	16	2019-06-04	3	679000	0.92	320000	0.9	250	800	3	919000	0.98	560000	0.9	250	450	445000	0.9	5000	2019-06-04	4692.99	1474	2019-06-10	7009.87	481	1	4
1-O	1	1	osteo	GHO-4	H1-O	H23555	M	22	C1-O	C8861	M	16	2019-06-07	3	1097000	0.64	280000	0.7	200	720	3	7740000	0.845	430000	0.7	200	466	395000	0.7	5000	2019-06-07	1710.64	1494	2019-06-10	4779.62	480	1	4
1-I-r2	2	R	iPSC	HOU-10	H1-I-r2	H23555	M	22	C1-I-r2	C8861	M	16	2019-10-28	3	10900000	0.62	380000	0.85	100	266	3	10400000	0.87	555000	0.85	100	181	345000	0.85	5000	2019-10-28	5377.43	1423	2019-11-04	3850.25	451	2	9
1-M-r2	2	R	MSC	HOU-12	H1-M-r2	H23555	M	22	C1-M-r2	C8861	M	16	2019-10-29	3	1840000	0.97	630000	0.95	200	320	3	2000000	0.97	1255000	0.95	200	160	630000	0.95	5000	2019-10-29	4719.73	1555	2019-11-04	3390.34	474	2	9
1-O-r2	2	R	osteo	HOU-16	H1-O-r2	H23555	M	22	C1-O-r2	C8861	M	16	2019-11-01	3	154000	0.53	345000	0.85	75	218	3	1840000	0.67	445000	0.85	75	173	350000	0.85	5000	2019-11-01	2352.33	1349	2019-11-04	2317.17	458	2	9
2-I	1	2	iPSC	HOU-1	H2-I	H20157	F	23	C2-I	C3647	F	9	2019-10-14	6	840000	0.76	170000	0.8	30	176.4	9	150000	0.61	200000	0.8	30	150	200000	0.8	5000	2019-10-14	4233.99	1526	2019-10-23	4677.67	495	2	9
2-M	1	2	MSC	HOU-2	H2-M	H20157	F	23	C2-M	C3647	F	9	2019-10-15	3	1730000	0.98	745000	0.9	200	268	3	1820000	0.95	895000	0.9	200	224	780000	0.9	5000	2019-10-15	4952.77	1579	2019-10-23	4102.09	486	2	9
2-O	1	2	osteo	HOU-4	H2-O	H20157	F	23	C2-O	C3647	F	9	2019-10-18	3	4390000	0.33	750000	0.85	100	140	3	6900000	0.74	250000	0.85	100	400	375000	0.85	5000	2019-10-18	2604.43	1454	2019-10-23	2656	474	2	9
3-I	1	3	iPSC	HOU-9	H3-I	H28126	M	21	C3-I	C3649	M	9	2019-10-28	2	1050000	0.7	425000	0.85	100	240	3	2550000	0.81	555000	0.8	100	181	480000	0.8	5000	2019-10-28	5115.4	1417	2019-11-04	10406.2	529	2	9
3-M	1	3	MSC	HOU-11	H3-M	H28126	M	21	C3-M	C3649	M	9	2019-10-29	1	246000	0.77	190000	0.8	30	159	3	1600000	0.71	290000	0.9	30	105	190000	0.8	5000	2019-10-29	551.58	1443	2019-11-04	2656.4	482	2	9
3-O	1	3	osteo	HOU-15	H3-O	H28126	M	21	C3-O	C3649	M	9	2019-11-01	2	490000	0.19	135000	0.4	25	185	3	565000	0.47	195000	0.7	25	128	200000	0.6	5000	2019-11-01	1235.99	1229	2019-11-04	1451.05	458	2	9
4-I	1	4	iPSC	HOU-5	H4-I	H28834	F	30	C4-I	C40210	F	14	2019-10-21	3	655000	0.64	400000	0.8	100	250	6	725000	0.8	335000	0.9	100	300	360000	0.8	5000	2019-10-21	6553.56	1485	2019-10-23	2900.34	475	2	9
4-M	1	4	MSC	HOU-6	H4-M	H28834	F	30	C4-M	C40210	F	14	2019-10-22	2	515000	0.82	310000	0.85	100	330	2	1220000	0.98	790000	0.85	100	130	585000	0.85	5000	2019-10-22	7557.62	1466	2019-10-23	6559.96	471	2	9
4-O	1	4	osteo	HOU-8	H4-O	H28834	F	30	C4-O	C40210	F	14	2019-10-25	3	948000	0.41	446000	0.8	100	230	3	1080000	0.87	690000	0.8	100	150	440000	0.8	5000	2019-10-25	1661.65	1371	2019-11-04	2346.8	510	2	9
5-I	1	5	iPSC	HOU-17	H5-I	H21792	F	20	C5-I	C40280	F	17	2019-12-09	3	4770000	0.9	525000	0.9	100	191	3	6900000	0.95	420000	0.9	100	240	445000	0.85	5000	2019-12-09	2665.46	1548	2019-12-16	3247.5	458	3	4
5-M	1	5	MSC	HOU-19	H5-M	H21792	F	20	C5-M	C40280	F	17	2019-12-10	2	830000	0.88	280000	0.85	100	360	3	1490000	0.76	320000	0.9	100	320	260000	0.85	5000	2019-12-10	2257.35	1472	2019-12-16	2691.47	441	3	4
5-O	1	5	osteo	HOU-21	H5-O	H21792	F	20	C5-O	C40280	F	17	2019-12-13	3	551000	0.64	180000	0.85	50	282	3	986000	0.67	170000	0.85	50	300	185000	0.85	5000	2019-12-13	317.48	1419	2019-12-16	1298.46	479	3	4
6-I	1	6	iPSC	HOU-18	H6-I	H20961	M	18	C6-I	C3624	M	14	2019-12-09	3	2920000	0.88	440000	0.9	100	230	3	6900000	0.87	465000	0.9	100	220	340000	0.85	5000	2019-12-09	2388.46	1493	2019-12-16	3466.3	489	3	4
6-M	1	6	MSC	HOU-20	H6-M	H20961	M	18	C6-M	C3624	M	14	2019-12-10	3	1330000	0.86	250000	0.9	100	400	2	820000	0.91	460000	0.9	100	220	345000	0.85	5000	2019-12-10	2328.44	1402	2019-12-16	1013.76	450	3	4
6-O	1	6	osteo	HOU-22	H6-O	H20961	M	18	C6-O	C3624	M	14	2019-12-13	3	139000	0.4	305000	0.6	10	33	3	125000	0.77	170000	0.9	10	59	225000	0.8	5000	2019-12-13	285.69	1291	2019-12-16	4305.7	434	3	4

## Sheet: S9 Table (labels)
Batch Label	Definition
Pooled_Sample_Name	Name of the human and chimpanzee sample mixture.
Differentiation_Replicate	Differentiation technical replicate designation.
Differentiation_Batch	Differentiation batch designation.
Cell_Type	Cell type - iPSC, MSC, or osteo (abbreviation for osteogenic).
Sample_Name_at_Core	Sample name given at UChicago Genomics Core Facility.
Human_Sample_in_Pool	Unique sample identifier for human cell line in 10X pooling.
Human_Individual_in_Pool	Cell line identifier for human cell line in 10X pooling.
Human_Sex_in_Pool	Sex of human cell line in 10X pooling (M for Male or F for Female).
Human_Age_in_Pool	Age of human when fibroblasts for reprogramming were collected.
Chimp_Sample_in_Pool	Unique sample identifier for chimpanzee cell line in 10X pooling.
Chimp_Individual_in_Pool	Cell line identifier for chimpanzee cell line in 10X pooling.
Chimp_Sex_in_Pool	Sex of chimpanzee cell line in 10X pooling (M for Male or F for Female).
Chimp_Age_in_Pool	Age of chimpanzee when fibroblasts for reprogramming were collected.
Date_of_10X_Collection	Date that 10X scRNA was collected from cells.
Number_of_6wells_Used_Human	Number of 6-wells from which human cells were disassociated for 10X collection.
10X_Cell_Count_Prewash_Human	Total count of human cells (cells/mL) before washing and filtering that were collected for 10X run.
10X_Cell_Viability_Prewash_Human	Average human cell viability using trypan blue of cells collected for 10X run before washing and filtering.
10X_Cell_Count_Postwash_Human	Total count of human cells (cells/mL) after washing and filtering that were collected for 10X run.
10X_Cell_Viability_Postwash_Human	Average human cell viability using trypan blue of cells collected for 10X run after washing and filtering.
10X_Cell_Multiplication_Factor_for_Mixture_Human	Number of human cells after washing and filtering that were added to sample mixture before the 10X collection.
10X_Cell_Volume_for_Mixture_Human	Volume (uL) of human cells after washing and filtering that were added to sample mixture before the 10X collection.
Number_of_6wells_Used_Chimp	Number of 6-wells from which chimpanzee cells were disassociated for 10X collection.
10X_Cell_Count_Prewash_Chimp	Total count of chimpanzee cells (cells/mL) before washing and filtering that were collected for 10X run.
10X_Cell_Viability_Prewash_Chimp	Average chimpanzee cell viability using trypan blue of cells collected for 10X run before washing and filtering.
10X_Cell_Count_Postwash_Chimp	Total count of chimpanzee cells (cells/mL) after washing and filtering that were collected for 10X run.
10X_Cell_Viability_Postwash_Chimp	Average chimpanzee cell viability using trypan blue of cells collected for 10X run after washing and filtering.
10X_Cell_Multiplication_Factor_for_Mixture_Chimp	Number of chimpanzee cells after washing and filtering that were added to sample mixture before the 10X collection.
10X_Cell_Volume_for_Mixture_Chimp	Volume (uL) of chimpanzee cells after washing and filtering that were added to sample mixture before the 10X collection.
10X_Cell_Count_Postwash_Postmix	Total count of pooled human and chimp cells (cells/mL) after washing and filtering that were collected for 10X run.
10X_Cell_Viability_Postwash_Postmix	Average polled human and chimp cell viability using trypan blue of cells collected for 10X run after washing and filtering.
Targeted_Cell_Recovery	Number of cells targeted for 10X collection.
Date_of_10X_cDNA_Synthesis	Date that cDNA was synthesized from recovered 10X scRNA.
10X_cDNA_Concentration_pg/uL	Concentration (pg/uL) of cDNA synthesized from recovered 10X scRNA.
10X_cDNA_Average_Size_bp	Average base pair size of cDNA synthesized from recovered 10X scRNA.
Date_of_10X_Library_Prep	Date that 10X sequencing libraries were prepared.
10X_Library_Concentration_pg/uL	Concentration (pg/uL) of 10X sequencing libraries.
10X_Library_Average_Size_bp	Average base pair size of 10X sequencing libraries.
10X_Sequencing_Batch	Multiplexed libraries batch for sequencing designation.
10X_Sequencing_Lanes	Number of lanes sequenced on the Illumina HiSeq4000 for a given sequencing batch.
