# Supplementary material for: Evolutionary insights into primate skeletal gene regulation using a comparative cell culture model
Source: PLoS Genet. 2022 Mar 9;18(3):e1010073. doi: 10.1371/journal.pgen.1010073 (PMC8936463; doi:10.1371/journal.pgen.1010073)
Supplement: S10 Table — (XLSX) [file pgen.1010073.s011.xlsx]

## Sheet: S10 Table
Annotation Scheme	Cell Classification	Filtered Genes Tested in Standard DE Analyses	Filtered Genes Tested in Cormotif DE Analyses
Stage of Differentiation	Pluripotent (Time 0)	12391	11579
	Mesenchymal (Time 1)	11280	11579
	Osteogenic (Time 2)	11397	11579
General Unsupervised Clusters	iPSC.c1	12381	10742
	iPSC.c2	11265	10742
	iPSC.c3	11681	10742
	MSC.c1	11283	10742
	Osteogenic.c1	11482	10742
	Osteogenic.c2	11449	10742
General Unsupervised Clusters	iPSC.c1.c2.c3	12387	---
	MSC.c1	11283	---
	Osteogenic.c1.c2	11449	---
General Ad Hoc Assignments	iPSC	12394	11824
	MSC	11409	11824
	Osteogenic	11432	11824
Osteogenic Ad Hoc Assignments	Preosteoblast	10993	10669
	Osteoblast	11104	10669
	Embedding Osteoblast	11231	10669
	Mineralizing Osteoblast	11033	10669
	Maturing Osteocyte	10861	10669
Osteogenic Unsupervised Clusters	Osteogenic.c1	11392	10671
	Osteogenic.c2	8188	10671
	Osteogenic.c3	11622	10671
	Osteogenic.c4	10723	10671
