# Supplementary material for: Evolutionary insights into primate skeletal gene regulation using a comparative cell culture model
Source: PLoS Genet. 2022 Mar 9;18(3):e1010073. doi: 10.1371/journal.pgen.1010073 (PMC8936463; doi:10.1371/journal.pgen.1010073)
Supplement: S11 Table — (XLSX) [file pgen.1010073.s012.xlsx]

## Sheet: S11 Table
Classification Set	Classification Subset	Gene	logFC	AveExpr	t	P.Value	FDR	z.std	cell.assign	cell.subset
Stages of Differentiation	Time 0	EXOSC4	9.99435	1.70172	25.493	8.07371e-12	1.00041e-07	6.83723	stage	Time 0
		TRIM52	-2.52022	3.99287	-23.525	2.08035e-11	1.28888e-07	-6.70027	stage	Time 0
		CTSF	-6.69282	1.77325	-22.4378	3.62768e-11	1.49835e-07	-6.61854	stage	Time 0
		PER3	-2.92178	3.49522	-23.1822	5.57668e-11	1.72752e-07	-6.55467	stage	Time 0
		IFNAR1	1.77399	3.48168	20.2919	1.17764e-10	2.91844e-07	6.44219	stage	Time 0
		MEIOB	-6.20448	4.27921	-19.7161	1.64806e-10	2.93427e-07	-6.391	stage	Time 0
		BCAP31	4.5965	5.19545	23.7928	1.65765e-10	2.93427e-07	6.39011	stage	Time 0
		TSACC	4.78132	0.843041	18.8349	2.86447e-10	4.4367e-07	6.30594	stage	Time 0
		ACOT6	-6.09728	0.439621	-19.3193	4.50031e-10	6.19592e-07	-6.23561	stage	Time 0
		PSEN2	3.06592	2.67029	17.7694	5.52157e-10	6.84178e-07	6.20352	stage	Time 0
		FKBP1C	-6.35757	3.77111	-17.3706	7.31261e-10	8.23732e-07	-6.15917	stage	Time 0
		MRM1	1.7397	2.13597	17.0299	9.03117e-10	9.32543e-07	6.12565	stage	Time 0
		SLC6A8	8.42739	1.77216	16.7774	1.07314e-09	9.88977e-07	6.09813	stage	Time 0
		ARPIN	-2.19862	2.88452	-16.7188	1.1174e-09	9.88977e-07	-6.09167	stage	Time 0
		SRRD	3.03905	4.96595	16.6051	1.20896e-09	9.98685e-07	6.07905	stage	Time 0
		HLA-A	10.3498	1.79346	20.6069	1.90549e-09	1.47568e-06	6.00567	stage	Time 0
		SVIP	1.75514	3.92406	15.7096	2.28824e-09	1.66786e-06	5.9759	stage	Time 0
		PBLD	-3.3807	2.56777	-15.7918	2.58564e-09	1.69481e-06	-5.95595	stage	Time 0
		AKR7A3	-5.05327	1.73238	-15.5542	2.59877e-09	1.69481e-06	-5.95512	stage	Time 0
		ENOSF1	4.08093	2.56801	14.9763	4.45961e-09	2.76295e-06	5.86618	stage	Time 0
		TAPT1	-1.08479	2.76383	-14.4964	5.73937e-09	3.3865e-06	-5.82418	stage	Time 0
		TLCD5	1.89073	3.77608	17.3006	6.53822e-09	3.6825e-06	5.80237	stage	Time 0
		EMB	1.34812	4.52487	14.257	6.93794e-09	3.73774e-06	5.79242	stage	Time 0
		STAP2	1.99579	2.49516	14.0501	8.19281e-09	4.22988e-06	5.76444	stage	Time 0
		KRTCAP3	3.21615	4.45846	15.8189	9.13629e-09	4.52831e-06	5.74603	stage	Time 0
		EBPL	2.13346	7.40895	13.808	9.97968e-09	4.70237e-06	5.73107	stage	Time 0
		TMEM138	1.71772	4.54613	17.9907	1.03059e-08	4.70237e-06	5.72562	stage	Time 0
		TEKT2	-3.83421	1.4234	-13.7317	1.0626e-08	4.70237e-06	-5.72042	stage	Time 0
		ECH1	2.48392	6.20049	16.7562	1.23462e-08	5.27525e-06	5.69488	stage	Time 0
		CD99L2	-2.37172	2.67659	-13.4911	1.29804e-08	5.36132e-06	-5.68632	stage	Time 0
		CLCC1	-1.14909	4.86757	-13.2112	1.64494e-08	6.24938e-06	-5.64572	stage	Time 0
		TCEAL2	6.28729	2.23125	13.3886	1.68883e-08	6.24938e-06	5.64119	stage	Time 0
		C1GALT1	1.07206	5.90327	13.1625	1.71486e-08	6.24938e-06	5.63855	stage	Time 0
		MVP	-5.19497	1.87442	-13.1415	1.74613e-08	6.24938e-06	-5.63544	stage	Time 0
		ZNF551	1.48663	3.5557	15.8064	1.77066e-08	6.24938e-06	5.63303	stage	Time 0
		TMEM220	-1.3593	4.84882	-13.096	1.81565e-08	6.24938e-06	-5.62871	stage	Time 0
		ZER1	-0.713014	3.25256	-13.017	1.94376e-08	6.49045e-06	-5.61693	stage	Time 0
		ZNF626	1.34262	3.91651	12.9896	1.99045e-08	6.49045e-06	5.61283	stage	Time 0
		ZNF677	2.07857	4.51326	15.277	2.25451e-08	7.09727e-06	5.59124	stage	Time 0
		AMZ1	-2.27947	0.515835	-12.8282	2.29111e-08	7.09727e-06	-5.58845	stage	Time 0
		PLA2G7	-3.59615	3.8123	-13.6586	2.42267e-08	7.14958e-06	-5.57874	stage	Time 0
		SPATS2L	4.273	5.93612	14.7518	2.45644e-08	7.14958e-06	5.57633	stage	Time 0
		CCNB1IP1	2.81226	7.1472	12.7376	2.48109e-08	7.14958e-06	5.57459	stage	Time 0
		YAP1	-1.65079	6.398	-15.5469	2.54005e-08	7.15313e-06	-5.5705	stage	Time 0
		HHLA3	4.64437	2.25078	12.9116	2.65958e-08	7.32331e-06	5.56249	stage	Time 0
		D2HGDH	-1.72191	3.8247	-12.6029	2.79563e-08	7.53058e-06	-5.55378	stage	Time 0
		RAC1	0.931654	9.39402	12.5451	2.94331e-08	7.75968e-06	5.54478	stage	Time 0
		TMEM158	2.34604	4.47741	13.2516	3.06822e-08	7.92048e-06	5.5375	stage	Time 0
		LGALSL	1.20481	4.59135	12.3007	3.66877e-08	9.24457e-06	5.5061	stage	Time 0
		MLST8	1.55628	5.81616	12.2824	3.73036e-08	9.24457e-06	5.50316	stage	Time 0
		LGALS2	-5.65744	0.493181	-12.2587	3.81158e-08	9.26065e-06	-5.49937	stage	Time 0
		DIS3	-0.725325	5.65834	-12.1789	4.10016e-08	9.40595e-06	-5.48648	stage	Time 0
		NGB	-2.61948	0.594655	-12.1624	4.16263e-08	9.40595e-06	-5.48381	stage	Time 0
		CNIH3	2.44501	1.85921	12.3194	4.19809e-08	9.40595e-06	5.48231	stage	Time 0
		DMC1	-1.87882	2.95377	-12.1415	4.24325e-08	9.40595e-06	-5.48042	stage	Time 0
		C10orf143	-3.14526	4.00832	-14.5376	4.25094e-08	9.40595e-06	-5.4801	stage	Time 0
		ZWINT	2.16244	6.19865	12.0527	4.6055e-08	1.00117e-05	5.46591	stage	Time 0
		MFF	1.06427	6.68678	14.7204	4.84454e-08	1.03498e-05	5.45692	stage	Time 0
		DIAPH2	2.97666	5.32169	13.8426	4.99936e-08	1.03782e-05	5.45133	stage	Time 0
		C1orf94	4.08402	1.52956	12.2415	5.03061e-08	1.03782e-05	5.45022	stage	Time 0
		NPIPB5	1.67264	5.49844	11.9409	5.10913e-08	1.03782e-05	5.44747	stage	Time 0
		DDT	-4.05945	5.20309	-12.214	5.82956e-08	1.15058e-05	-5.42395	stage	Time 0
		MED28	1.20941	6.72146	11.7965	5.84993e-08	1.15058e-05	5.42333	stage	Time 0
		C16orf95	-3.8165	2.6258	-11.9851	6.24281e-08	1.19061e-05	-5.4117	stage	Time 0
		ASAH1	1.91151	5.52629	11.7272	6.24561e-08	1.19061e-05	5.41162	stage	Time 0
		ORC1	-1.3018	5.31192	-11.6478	6.73496e-08	1.26444e-05	-5.3981	stage	Time 0
		STPG1	2.02072	2.45508	12.3863	7.59135e-08	1.38382e-05	5.37658	stage	Time 0
		RETREG3	-0.658231	4.08313	-11.5165	7.63647e-08	1.38382e-05	-5.37551	stage	Time 0
		NEK9	-2.48959	4.28101	-13.0391	7.70587e-08	1.38382e-05	-5.37388	stage	Time 0
		C8orf37	-1.94917	2.46427	-12.0404	7.96567e-08	1.41004e-05	-5.3679	stage	Time 0
		PGAM5	1.97289	4.50212	11.4189	8.39086e-08	1.44919e-05	5.35852	stage	Time 0
		HEMK1	1.57545	2.13731	12.4893	8.42077e-08	1.44919e-05	5.35787	stage	Time 0
		MAML2	2.7951	1.9786	12.1704	1.04252e-07	1.76957e-05	5.31915	stage	Time 0
		MMP24	5.55025	1.05825	11.1955	1.06613e-07	1.7852e-05	5.31508	stage	Time 0
		SEC22A	1.52116	2.68474	12.3249	1.10754e-07	1.8298e-05	5.30813	stage	Time 0
		TYMP	-1.67999	3.41931	-11.1214	1.12285e-07	1.83068e-05	-5.30563	stage	Time 0
		FKBP9	-2.5929	3.07262	-11.2723	1.13832e-07	1.8318e-05	-5.30313	stage	Time 0
		VPS39	-0.928374	3.67501	-14.6073	1.34205e-07	2.13196e-05	-5.27301	stage	Time 0
		C16orf91	1.40249	5.31527	12.7227	1.35973e-07	2.13271e-05	5.27061	stage	Time 0
		ORAI3	-1.83987	4.42816	-10.8676	1.44727e-07	2.21662e-05	-5.25914	stage	Time 0
		RAD50	-1.58467	4.30477	-13.0544	1.449e-07	2.21662e-05	-5.25892	stage	Time 0
		FAM174C	1.19372	6.95052	11.9696	1.46763e-07	2.21774e-05	5.25657	stage	Time 0
		RRS1	2.53109	5.36006	10.7983	1.55249e-07	2.3177e-05	5.24622	stage	Time 0
		RUSC1	1.66425	5.70559	14.547	1.5814e-07	2.32414e-05	5.24282	stage	Time 0
		EMILIN2	4.17579	1.10505	11.3953	1.60746e-07	2.32414e-05	5.23981	stage	Time 0
		GRK4	-1.96686	2.73922	-11.1786	1.62573e-07	2.32414e-05	-5.23772	stage	Time 0
		RDH14	1.23312	5.8043	13.5869	1.63183e-07	2.32414e-05	5.23703	stage	Time 0
		KLKB1	6.28587	1.4429	10.8073	1.72821e-07	2.43344e-05	5.22642	stage	Time 0
		NEMP2	-1.22053	2.68048	-10.6702	1.7691e-07	2.46302e-05	-5.2221	stage	Time 0
		CSPG4	-2.31692	0.316741	-10.6243	1.85453e-07	2.55327e-05	-5.21336	stage	Time 0
		DPH3	1.6071	6.47224	21.5314	1.9008e-07	2.58822e-05	5.20879	stage	Time 0
		PRIM2	1.67134	4.89385	10.585	1.93114e-07	2.60096e-05	5.20585	stage	Time 0
		ZNF215	2.80036	2.05981	10.5577	1.98635e-07	2.64246e-05	5.20061	stage	Time 0
		GRK5	-1.75009	0.977042	-11.3018	2.00461e-07	2.64246e-05	-5.19891	stage	Time 0
		NCKIPSD	1.11426	3.18494	11.7345	2.06209e-07	2.68962e-05	5.19365	stage	Time 0
		ADPRM	1.32327	2.29087	10.4813	2.15021e-07	2.77534e-05	5.18586	stage	Time 0
		MCM2	-1.14882	6.0494	-10.4592	2.20009e-07	2.78966e-05	-5.18158	stage	Time 0
		ZNF277	-1.19253	5.22209	-10.4565	2.20633e-07	2.78966e-05	-5.18106	stage	Time 0
		GUK1	1.50922	7.76182	12.7623	2.24153e-07	2.79371e-05	5.1781	stage	Time 0
		PPM1F	-0.808034	3.71104	-10.4232	2.28426e-07	2.79371e-05	-5.17458	stage	Time 0
		EXOSC3	2.13419	6.46346	14.5231	2.2885e-07	2.79371e-05	5.17423	stage	Time 0
		AC005702.1	-3.10512	0.66691	-10.4168	2.29972e-07	2.79371e-05	-5.17332	stage	Time 0
		UGGT2	1.46974	3.08434	11.0863	2.34349e-07	2.81924e-05	5.1698	stage	Time 0
		TIGD2	-1.01183	2.51478	-10.382	2.38489e-07	2.84146e-05	-5.16652	stage	Time 0
		FCGBP	-3.13248	1.90859	-10.4069	2.45629e-07	2.89865e-05	-5.161	stage	Time 0
		TOMM22	1.72313	7.74777	13.0648	2.6382e-07	3.07995e-05	5.14761	stage	Time 0
		DXO	-1.21029	4.2129	-10.2683	2.6884e-07	3.07995e-05	-5.14408	stage	Time 0
		VPS51	0.882978	5.66009	10.2638	2.70109e-07	3.07995e-05	5.14319	stage	Time 0
		EAF2	1.48038	2.92141	10.2609	2.70934e-07	3.07995e-05	5.14262	stage	Time 0
		ST3GAL1	-2.58099	3.34574	-12.4945	2.80166e-07	3.15594e-05	-5.13632	stage	Time 0
		RASSF4	1.79758	1.9769	10.1616	3.01079e-07	3.33181e-05	5.12277	stage	Time 0
		MMP24OS	2.61792	4.47452	10.4993	3.02703e-07	3.33181e-05	5.12176	stage	Time 0
		C19orf12	1.37778	3.94959	11.9201	3.03845e-07	3.33181e-05	5.12105	stage	Time 0
		RNASEH1	1.4018	5.52704	12.006	3.07727e-07	3.34477e-05	5.11865	stage	Time 0
		FAM227B	3.25802	1.6244	11.2497	3.11994e-07	3.36002e-05	5.11605	stage	Time 0
		GLIPR1L1	5.68203	0.5578	12.2453	3.14553e-07	3.36002e-05	5.11451	stage	Time 0
		ACAD8	2.47277	4.28796	11.108	3.26656e-07	3.45948e-05	5.10738	stage	Time 0
		TMEM117	-1.70047	0.954959	-10.7252	3.36879e-07	3.53751e-05	-5.10155	stage	Time 0
		ISCA1	0.737965	7.19	10.0234	3.49193e-07	3.63249e-05	5.09475	stage	Time 0
		ITGAE	2.38827	6.24311	12.9394	3.51787e-07	3.63249e-05	5.09335	stage	Time 0
		GGH	2.01611	4.62364	11.2168	3.67225e-07	3.76057e-05	5.08521	stage	Time 0
		SMPDL3B	1.54807	4.67381	9.96303	3.72752e-07	3.78587e-05	5.08237	stage	Time 0
		NOA1	1.37218	4.77816	9.93947	3.82398e-07	3.85227e-05	5.07752	stage	Time 0
		ACAP1	-2.12306	4.78466	-9.90171	3.98429e-07	3.95943e-05	-5.06971	stage	Time 0
		SECISBP2	0.609651	6.37646	11.0803	3.99426e-07	3.95943e-05	5.06923	stage	Time 0
		SLC25A51	1.60851	2.60367	9.8883	4.04292e-07	3.97586e-05	5.06693	stage	Time 0
		AC015802.6	-5.55022	4.00202	-10.4274	4.19169e-07	4.08971e-05	-5.06004	stage	Time 0
		RILP	2.706	2.83806	10.2467	4.31832e-07	4.16236e-05	5.05436	stage	Time 0
		HYKK	3.20761	0.229005	9.82483	4.33334e-07	4.16236e-05	5.0537	stage	Time 0
		SH2D5	-1.59094	3.24251	-9.81413	4.38449e-07	4.17909e-05	-5.05146	stage	Time 0
		SLC27A5	3.25475	4.43017	10.4564	4.52045e-07	4.26696e-05	5.04562	stage	Time 0
		FAM114A1	1.78442	2.74214	10.611	4.57418e-07	4.26696e-05	5.04336	stage	Time 0
		KREMEN1	-1.69591	1.79559	-9.77293	4.5875e-07	4.26696e-05	-5.04281	stage	Time 0
		TPTEP2-CSNK1E	2.67834	0.802876	10.2255	4.61442e-07	4.26696e-05	5.04169	stage	Time 0
		DHRS12	3.1053	1.4915	9.7434	4.73924e-07	4.34244e-05	5.03658	stage	Time 0
		RCBTB1	-1.22676	3.75101	-9.73827	4.76613e-07	4.34244e-05	-5.0355	stage	Time 0
		ACBD7	-1.55205	2.5388	-9.69695	4.98886e-07	4.50787e-05	-5.02674	stage	Time 0
		EOLA1	3.66185	0.616647	9.69125	5.02047e-07	4.50787e-05	5.02553	stage	Time 0
		DCP2	0.792495	6.45684	9.67294	5.1234e-07	4.52772e-05	5.02163	stage	Time 0
		COPG2	-1.43617	4.68729	-9.66727	5.15576e-07	4.52772e-05	-5.02042	stage	Time 0
		AFMID	2.52895	3.20999	11.4224	5.15945e-07	4.52772e-05	5.02029	stage	Time 0
		IMMP1L	-0.736708	6.15662	-11.241	5.18874e-07	4.52772e-05	-5.0192	stage	Time 0
		SPATA33	1.50537	4.45694	11.0438	5.28345e-07	4.55243e-05	5.01572	stage	Time 0
		ABCC4	-1.97106	3.62296	-9.63787	5.32698e-07	4.55243e-05	-5.01414	stage	Time 0
		AC233723.1	-3.08904	0.256623	-9.63782	5.32727e-07	4.55243e-05	-5.01413	stage	Time 0
		C12orf60	2.59787	0.0321688	10.5762	5.53506e-07	4.6976e-05	5.00677	stage	Time 0
		PEX16	1.12483	4.57662	10.9012	5.59502e-07	4.7125e-05	5.0047	stage	Time 0
		DOCK4	-2.54772	4.33552	-11.1203	5.62868e-07	4.7125e-05	-5.00354	stage	Time 0
		TUBB8	-4.55606	1.09638	-9.55045	5.87323e-07	4.88424e-05	-4.99534	stage	Time 0
		CCL26	6.12096	1.79599	9.63215	6.15697e-07	5.06488e-05	4.98623	stage	Time 0
		LYRM7	1.63332	3.91075	9.50623	6.1722e-07	5.06488e-05	4.98575	stage	Time 0
		CYB5R2	2.16707	3.50308	10.1274	6.27734e-07	5.11727e-05	4.98248	stage	Time 0
		ADSS1	-2.42177	2.8998	-9.96109	6.62707e-07	5.36706e-05	-4.97199	stage	Time 0
		ZFR2	-2.24164	0.576115	-9.42957	6.72982e-07	5.41488e-05	-4.969	stage	Time 0
		ZFAND2B	1.33579	3.97244	10.7636	6.90018e-07	5.51614e-05	4.96415	stage	Time 0
		ETFDH	1.18894	3.3196	9.38977	7.04047e-07	5.59221e-05	4.96024	stage	Time 0
		GOLGA4	1.0083	6.09615	11.9535	7.10458e-07	5.60719e-05	4.95848	stage	Time 0
		C13orf42	3.93673	0.790207	11.0858	7.1535e-07	5.61006e-05	4.95715	stage	Time 0
		SLC16A10	2.19718	2.92819	9.62802	7.25803e-07	5.6361e-05	4.95433	stage	Time 0
		PPP1R3E	-1.27333	2.02865	-9.35938	7.28801e-07	5.6361e-05	-4.95353	stage	Time 0
		ABT1	1.37371	5.8454	10.9194	7.32315e-07	5.6361e-05	4.95259	stage	Time 0
		ARPC5	1.01385	7.28622	10.1933	7.40187e-07	5.66151e-05	4.95051	stage	Time 0
		FBXO4	-2.74408	1.3875	-10.7918	7.61634e-07	5.78982e-05	-4.94495	stage	Time 0
		LPCAT2	1.52673	1.63574	9.30207	7.78059e-07	5.87861e-05	4.94079	stage	Time 0
		FSTL3	1.29367	1.97251	10.7712	7.99259e-07	6.00094e-05	4.93555	stage	Time 0
		POLA1	-1.11986	4.58121	-9.27351	8.03935e-07	6.00094e-05	-4.93441	stage	Time 0
		ELP6	1.18068	5.89358	10.4198	8.10263e-07	6.01195e-05	4.93288	stage	Time 0
		SNX3	1.07984	7.74934	10.9443	8.2307e-07	6.03249e-05	4.92982	stage	Time 0
		GOSR1	2.44457	4.84933	10.7477	8.23521e-07	6.03249e-05	4.92971	stage	Time 0
		ASB8	1.26874	3.21299	10.4259	8.27636e-07	6.03249e-05	4.92874	stage	Time 0
		VEGFB	2.41782	4.86412	9.81083	8.3606e-07	6.05825e-05	4.92676	stage	Time 0
		LOXL1	-1.75189	3.51869	-9.23049	8.44664e-07	6.08502e-05	-4.92475	stage	Time 0
		ZNF232	1.66539	4.68777	9.21585	8.5902e-07	6.15267e-05	4.92146	stage	Time 0
		MTIF3	1.17353	5.48401	9.93658	8.695e-07	6.17792e-05	4.91908	stage	Time 0
		NFIC	-1.37812	3.36841	-10.6839	8.72517e-07	6.17792e-05	-4.91841	stage	Time 0
		PLEKHB2	-0.764286	6.62077	-11.2984	8.92309e-07	6.28216e-05	-4.91401	stage	Time 0
		WDR4	2.03071	3.06053	9.32636	9.05057e-07	6.33591e-05	4.91123	stage	Time 0
		SUSD4	-3.20095	2.01374	-9.16353	9.12522e-07	6.35228e-05	-4.90962	stage	Time 0
		C11orf71	2.3501	2.28425	9.15557	9.20974e-07	6.3753e-05	4.90781	stage	Time 0
		DGAT2	-1.742	2.09521	-10.6212	9.44945e-07	6.50489e-05	-4.90277	stage	Time 0
		MCCC1	-1.22041	3.9733	-9.12724	9.51721e-07	6.51535e-05	-4.90137	stage	Time 0
		SDR39U1	1.64832	5.04781	10.4826	9.85094e-07	6.70676e-05	4.89459	stage	Time 0
		ANAPC2	-1.06316	3.48591	-9.0782	1.0076e-06	6.78774e-05	-4.89015	stage	Time 0
		STYXL1	2.85415	3.14217	10.0424	1.00795e-06	6.78774e-05	4.89008	stage	Time 0
		TBC1D9	-3.02665	1.62361	-9.06785	1.0271e-06	6.87935e-05	-4.88637	stage	Time 0
		SYDE2	1.51878	2.93782	9.03976	1.05384e-06	7.02053e-05	4.88131	stage	Time 0
		HPS1	1.05359	4.90853	9.02949	1.06658e-06	7.03101e-05	4.87894	stage	Time 0
		DMRTA1	1.88285	2.49237	9.02745	1.06913e-06	7.03101e-05	4.87847	stage	Time 0
		DFFA	1.2713	6.16961	9.99575	1.07244e-06	7.03101e-05	4.87786	stage	Time 0
		CARMIL2	1.92528	2.90903	10.3355	1.09956e-06	7.1709e-05	4.87293	stage	Time 0
		PLOD3	1.06241	4.1102	8.9743	1.13793e-06	7.38226e-05	4.86615	stage	Time 0
		AGA	-1.57454	4.22079	-8.96561	1.14962e-06	7.41926e-05	-4.86413	stage	Time 0
		ANKEF1	2.1578	1.1463	8.95691	1.16145e-06	7.43721e-05	4.8621	stage	Time 0
		ZNF415	-0.740539	2.89862	-8.95475	1.16441e-06	7.43721e-05	-4.8616	stage	Time 0
		PLPBP	-1.04885	5.86856	-8.9427	1.18107e-06	7.49487e-05	-4.85879	stage	Time 0
		TRIM8	0.738974	4.27694	8.93815	1.18742e-06	7.49487e-05	4.85773	stage	Time 0
		TRIOBP	-0.877477	6.21488	-10.6277	1.1995e-06	7.49487e-05	-4.85572	stage	Time 0
		PLCG1	-0.893182	4.1582	-8.92736	1.20263e-06	7.49487e-05	-4.8552	stage	Time 0
		ZNF665	2.61338	0.456504	8.92663	1.20368e-06	7.49487e-05	4.85503	stage	Time 0
		COCH	3.5578	2.26614	9.67749	1.2152e-06	7.52877e-05	4.85314	stage	Time 0
		GTF2F1	0.738536	5.4737	10.1775	1.25485e-06	7.72501e-05	4.84677	stage	Time 0
		PUSL1	0.714247	6.0646	10.5643	1.25934e-06	7.72501e-05	4.84606	stage	Time 0
		NOL12	-1.30249	4.65085	-8.87723	1.27613e-06	7.77544e-05	-4.84344	stage	Time 0
		KLHDC4	-0.816501	5.06105	-8.8746	1.28011e-06	7.77544e-05	-4.84282	stage	Time 0
		BIRC6	-0.775244	5.94044	-9.89681	1.29229e-06	7.8028e-05	-4.84094	stage	Time 0
		MANSC1	1.46513	1.72129	8.85981	1.30277e-06	7.8028e-05	4.83933	stage	Time 0
		SLC7A6	-1.60669	4.49834	-10.4442	1.30351e-06	7.8028e-05	-4.83922	stage	Time 0
		COX15	-0.903379	4.95134	-10.1468	1.32078e-06	7.8613e-05	-4.8366	stage	Time 0
		LIN54	-0.9971	2.8691	-10.1511	1.32749e-06	7.8613e-05	-4.83559	stage	Time 0
		HAUS5	-1.03507	4.23725	-10.2632	1.33232e-06	7.8613e-05	-4.83487	stage	Time 0
		SORBS2	5.73981	3.37784	9.99411	1.36054e-06	7.9264e-05	4.8307	stage	Time 0
		VSNL1	4.52388	4.4196	9.72098	1.36125e-06	7.9264e-05	4.8306	stage	Time 0
		CCDC191	-2.88199	1.74077	-9.58798	1.3643e-06	7.9264e-05	-4.83015	stage	Time 0
		MTHFSD	-1.36342	3.20801	-9.91669	1.37137e-06	7.9264e-05	-4.82912	stage	Time 0
		NPRL3	1.30232	4.16284	8.81426	1.37533e-06	7.9264e-05	4.82855	stage	Time 0
		NFYA	-1.24482	3.62931	-10.3792	1.38296e-06	7.93346e-05	-4.82744	stage	Time 0
		TCTN3	0.76466	4.66648	10.0087	1.42047e-06	8.10381e-05	4.82211	stage	Time 0
		FOXM1	1.28495	5.56802	8.78186	1.42956e-06	8.10381e-05	4.82084	stage	Time 0
		PAQR5	3.03519	0.55828	9.12839	1.43228e-06	8.10381e-05	4.82046	stage	Time 0
		BRK1	0.591785	8.86762	8.77209	1.44636e-06	8.1463e-05	4.81851	stage	Time 0
		SVIL	1.20295	4.60232	8.75928	1.46872e-06	8.23479e-05	4.81545	stage	Time 0
		SCGB3A2	6.55028	3.81134	10.128	1.48306e-06	8.27777e-05	4.8135	stage	Time 0
		HMCN1	-3.14109	3.54528	-8.74464	1.4947e-06	8.30531e-05	-4.81194	stage	Time 0
		TMEM25	-1.07653	3.9741	-9.48798	1.50683e-06	8.31156e-05	-4.81033	stage	Time 0
		NAIP	3.95183	0.226969	8.96008	1.51359e-06	8.31156e-05	4.80943	stage	Time 0
		LRRC69	2.4136	0.442848	9.0903	1.52204e-06	8.31156e-05	4.80832	stage	Time 0
		NISCH	-1.13663	5.45059	-10.7672	1.52266e-06	8.31156e-05	-4.80824	stage	Time 0
		CFAP97	1.9681	4.99317	9.92427	1.56982e-06	8.53142e-05	4.80214	stage	Time 0
		IFNAR2	-2.30564	4.46821	-9.66779	1.58401e-06	8.57005e-05	-4.80033	stage	Time 0
		CDK2AP1	-0.778235	9.60114	-11.3376	1.59076e-06	8.57005e-05	-4.79948	stage	Time 0
		CLN6	1.70272	2.96897	9.14735	1.61095e-06	8.63043e-05	4.79696	stage	Time 0
		GFRA3	-1.93172	0.905756	-10.1002	1.6159e-06	8.63043e-05	-4.79634	stage	Time 0
		CXCL3	5.02588	0.506826	8.75735	1.62378e-06	8.63532e-05	4.79537	stage	Time 0
		POMC	3.3665	0.711705	8.70597	1.65241e-06	8.75003e-05	4.79186	stage	Time 0
		DDX51	-1.30155	5.22484	-8.64281	1.68976e-06	8.90971e-05	-4.78738	stage	Time 0
		DGUOK	0.730918	8.24462	8.62604	1.72442e-06	9.05393e-05	4.7833	stage	Time 0
		TARS3	1.61228	3.54624	9.68668	1.76164e-06	9.18153e-05	4.77901	stage	Time 0
		PHYKPL	1.71084	3.06513	9.12197	1.76354e-06	9.18153e-05	4.77879	stage	Time 0
		TSTD3	1.33219	3.17983	9.09929	1.77698e-06	9.20033e-05	4.77726	stage	Time 0
		ITGA2	2.88551	1.49747	9.37335	1.782e-06	9.20033e-05	4.77669	stage	Time 0
		ZNF577	1.21377	2.98523	10.6963	1.88209e-06	9.67673e-05	4.76569	stage	Time 0
		FAM149A	2.27031	1.29679	8.52909	1.94029e-06	9.89521e-05	4.75955	stage	Time 0
		CPN1	-5.00846	0.487425	-8.52898	1.94055e-06	9.89521e-05	-4.75952	stage	Time 0
		PPIL1	-0.674368	7.20575	-11.1567	1.95321e-06	9.90733e-05	-4.75821	stage	Time 0
		ZNF227	0.930713	2.66242	8.52127	1.95892e-06	9.90733e-05	4.75762	stage	Time 0
		METTL17	0.90515	4.29569	9.72686	1.97116e-06	9.92871e-05	4.75636	stage	Time 0
		ELAC2	1.15902	5.27134	8.51165	1.9821e-06	9.94338e-05	4.75524	stage	Time 0
		ZNF57	1.83044	2.38267	9.56918	2.06065e-06	0.000102958	4.74738	stage	Time 0
		LRP5L	1.65629	0.251633	8.4718	2.0813e-06	0.000103572	4.74537	stage	Time 0
		UNC93B1	1.61775	3.0593	9.76655	2.11725e-06	0.000104745	4.7419	stage	Time 0
		HSD17B8	-2.41869	3.85879	-9.82776	2.12178e-06	0.000104745	-4.74147	stage	Time 0
		PIGL	1.51503	3.78459	8.44137	2.16064e-06	0.00010624	4.73779	stage	Time 0
		RGL1	2.31812	0.377874	9.55504	2.18384e-06	0.000106956	4.73562	stage	Time 0
		LRIG2	1.97824	2.69204	9.40869	2.19897e-06	0.000107273	4.73422	stage	Time 0
		SFI1	1.47841	2.12172	8.42069	2.21641e-06	0.000107585	4.73262	stage	Time 0
		NFIB	1.8192	3.29402	8.41838	2.22272e-06	0.000107585	4.73204	stage	Time 0
		MPP7	0.970458	1.7824	8.4067	2.25502e-06	0.000108724	4.72911	stage	Time 0
		GGCT	1.05799	7.73	10.2674	2.27154e-06	0.000109095	4.72763	stage	Time 0
		CENPN	2.3494	5.92039	10.2469	2.29832e-06	0.000109956	4.72525	stage	Time 0
		ZBTB48	-0.893476	4.10499	-8.3794	2.33242e-06	0.0001107	-4.72226	stage	Time 0
		UFM1	1.39156	5.99779	8.37757	2.3377e-06	0.0001107	4.7218	stage	Time 0
		ZNF354A	0.723927	3.63736	8.37456	2.34643e-06	0.0001107	4.72104	stage	Time 0
		IMPACT	1.09389	5.15999	9.68449	2.34961e-06	0.0001107	4.72076	stage	Time 0
		FBXL2	-1.19494	1.8187	-8.36766	2.36657e-06	0.000110803	-4.7193	stage	Time 0
		LMCD1	4.50826	2.13012	8.46775	2.3697e-06	0.000110803	4.71903	stage	Time 0
		USP20	-1.19372	2.14093	-8.35607	2.4008e-06	0.000111836	-4.71638	stage	Time 0
		ZSCAN9	1.05463	3.04401	8.34949	2.42049e-06	0.000112205	4.71472	stage	Time 0
		THAP4	1.06431	5.43524	9.64995	2.42684e-06	0.000112205	4.71418	stage	Time 0
		SPATC1L	2.43019	5.65905	9.49659	2.45158e-06	0.000112732	4.71212	stage	Time 0
		UBXN6	-1.40081	4.79701	-10.2692	2.45974e-06	0.000112732	-4.71144	stage	Time 0
		LAGE3	-1.56762	8.64851	-8.95077	2.46553e-06	0.000112732	-4.71096	stage	Time 0
		SPATA45	-3.79388	1.08971	-9.5019	2.50421e-06	0.000114079	-4.70779	stage	Time 0
		CHRNA5	1.84986	3.71994	8.31885	2.51442e-06	0.000114125	4.70696	stage	Time 0
		HDAC10	0.949001	2.30835	8.31203	2.53587e-06	0.000114573	4.70522	stage	Time 0
		VAT1L	-2.17763	5.36572	-8.30984	2.54278e-06	0.000114573	-4.70467	stage	Time 0
		PARD3B	2.12649	1.2173	8.58949	2.63764e-06	0.000118416	4.69719	stage	Time 0
		SEC14L2	-1.18693	1.42923	-8.27524	2.6549e-06	0.000118761	-4.69586	stage	Time 0
		LYNX1	-2.19117	1.82563	-8.27131	2.66798e-06	0.000118917	-4.69485	stage	Time 0
		TEX22	-2.82376	0.941437	-8.2896	2.68781e-06	0.000119308	-4.69334	stage	Time 0
		TTLL7	1.69872	2.48299	8.99956	2.696e-06	0.000119308	4.69272	stage	Time 0
		CA13	1.43581	0.981676	8.87583	2.73559e-06	0.000120526	4.68974	stage	Time 0
		ABCD4	0.971689	5.29532	9.17134	2.74299e-06	0.000120526	4.68918	stage	Time 0
		DHRS1	-1.75361	3.69558	-8.77606	2.80999e-06	0.000122601	-4.68424	stage	Time 0
		MED18	2.80382	1.09756	8.288	2.81001e-06	0.000122601	4.68424	stage	Time 0
		MORN1	2.46544	0.693792	9.4068	2.85819e-06	0.000124266	4.68076	stage	Time 0
		COASY	0.998583	5.22041	9.56886	2.93228e-06	0.000127041	4.67551	stage	Time 0
		MYBPC2	-3.11489	1.09362	-8.3501	2.98202e-06	0.00012846	-4.67205	stage	Time 0
		CCDC82	1.04529	4.20644	9.08614	2.98575e-06	0.00012846	4.6718	stage	Time 0
		FAM53A	-2.56119	0.554762	-9.46445	3.04577e-06	0.000130589	-4.66771	stage	Time 0
		C9orf135	3.09214	5.12116	9.29609	3.05944e-06	0.000130723	4.66679	stage	Time 0
		ZNF79	-1.84677	1.35067	-8.14647	3.12103e-06	0.000132896	-4.66269	stage	Time 0
		SIRT5	-1.21698	4.90734	-9.40704	3.16548e-06	0.000134327	-4.65978	stage	Time 0
		TRAPPC6A	2.59042	4.92335	8.12401	3.21094e-06	0.000135791	4.65684	stage	Time 0
		MX1	-3.37002	3.30221	-8.10505	3.289e-06	0.000138619	-4.65189	stage	Time 0
		FAM53C	-0.533448	5.48345	-8.10125	3.30488e-06	0.000138651	-4.6509	stage	Time 0
		CDNF	-2.66176	0.211531	-8.09952	3.31213e-06	0.000138651	-4.65045	stage	Time 0
		CCDC150	1.43828	3.6532	8.09319	3.33883e-06	0.000139298	4.64879	stage	Time 0
		CLN3	-2.2679	1.51967	-9.19489	3.3851e-06	0.000140754	-4.64595	stage	Time 0
		GOLGA5	-0.466533	4.36029	-8.07465	3.41839e-06	0.000141498	-4.64393	stage	Time 0
		PUS3	1.17399	4.30285	8.07207	3.42963e-06	0.000141498	4.64325	stage	Time 0
		SMUG1	1.0936	4.32474	9.157	3.43724e-06	0.000141498	4.6428	stage	Time 0
		BTAF1	-0.8817	4.31085	-9.79905	3.46139e-06	0.000141767	-4.64135	stage	Time 0
		SPINDOC	0.65702	5.10082	8.06363	3.46667e-06	0.000141767	4.64104	stage	Time 0
		AGPS	-0.510392	5.56125	-11.1045	3.50942e-06	0.000143043	-4.6385	stage	Time 0
		PLAT	-1.67464	3.34444	-8.04346	3.55687e-06	0.000144502	-4.63573	stage	Time 0
		NYNRIN	-1.64159	3.02441	-8.04034	3.57106e-06	0.000144605	-4.6349	stage	Time 0
		SLC25A12	-1.16823	3.56819	-8.02431	3.64486e-06	0.000147112	-4.63067	stage	Time 0
		PDCD6IP	-0.917126	5.95955	-8.62053	3.71286e-06	0.000149294	-4.62684	stage	Time 0
		SLC9B2	1.4464	1.69436	8.83846	3.723e-06	0.000149294	4.62628	stage	Time 0
		TMEM200C	2.60057	1.76525	8.36403	3.74108e-06	0.000149535	4.62527	stage	Time 0
		UQCC2	-0.990322	8.17521	-8.50595	3.91816e-06	0.000155646	-4.61568	stage	Time 0
		CDKN1B	0.705395	3.91512	7.96764	3.9191e-06	0.000155646	4.61563	stage	Time 0
		SPA17	1.83649	2.91487	8.96284	3.97419e-06	0.000157293	4.61273	stage	Time 0
		CCNY	0.709547	6.15185	9.0995	3.99804e-06	0.000157293	4.61148	stage	Time 0
		PITPNM1	1.06896	3.09847	9.09319	4.00041e-06	0.000157293	4.61136	stage	Time 0
		PRRG4	2.335	1.53941	8.14727	4.01134e-06	0.000157293	4.61079	stage	Time 0
		ZNF83	0.998145	2.85143	7.93728	4.07506e-06	0.000158157	4.60752	stage	Time 0
		PRPF31	0.754327	6.66967	7.93594	4.08205e-06	0.000158157	4.60716	stage	Time 0
		OTUB1	-0.603336	7.12013	-7.93467	4.08874e-06	0.000158157	-4.60682	stage	Time 0
		PACC1	1.20755	4.16426	8.71527	4.09246e-06	0.000158157	4.60663	stage	Time 0
		UBE3B	-0.813097	4.97927	-7.93305	4.09731e-06	0.000158157	-4.60638	stage	Time 0
		THEMIS2	-1.09849	2.91497	-7.93065	4.10997e-06	0.000158157	-4.60574	stage	Time 0
		GIPC2	1.1086	0.335993	7.92046	4.16425e-06	0.00015975	4.60301	stage	Time 0
		PNPO	-2.05791	2.32461	-7.90485	4.24894e-06	0.000162496	-4.59882	stage	Time 0
		APOBEC3G	-3.50562	1.65921	-7.89413	4.3082e-06	0.000164255	-4.59593	stage	Time 0
		ACAD10	2.37633	1.27501	7.88522	4.35809e-06	0.000165648	4.59353	stage	Time 0
		ULK1	-0.915769	4.60002	-8.67398	4.39673e-06	0.000166474	-4.59169	stage	Time 0
		MIIP	1.77729	5.78421	9.369	4.40669e-06	0.000166474	4.59122	stage	Time 0
		KLF13	0.831924	4.13346	7.84594	4.58554e-06	0.000172703	4.58291	stage	Time 0
		ELMOD3	1.00527	2.62752	8.56	4.63091e-06	0.000173884	4.58085	stage	Time 0
		SHLD2	3.56929	3.32996	8.81645	4.67586e-06	0.000174376	4.57883	stage	Time 0
		HOOK3	-0.473275	4.97927	-7.83012	4.68066e-06	0.000174376	-4.57861	stage	Time 0
		LTB4R	2.21841	1.1111	9.37617	4.68625e-06	0.000174376	4.57836	stage	Time 0
		TSHZ3	3.05053	2.39613	8.07271	4.72972e-06	0.000175467	4.57643	stage	Time 0
		AC022415.3	2.4908	0.538673	7.80713	4.82271e-06	0.000178144	4.57236	stage	Time 0
		MIS18A	0.89208	6.93616	9.2271	4.83062e-06	0.000178144	4.57201	stage	Time 0
		ZNF322	1.23952	5.67604	7.80236	4.8528e-06	0.00017843	4.57105	stage	Time 0
		CEP131	-0.57225	3.93689	-7.79485	4.90047e-06	0.000179523	-4.569	stage	Time 0
		RNF168	0.845477	5.43983	8.99808	4.91943e-06	0.000179523	4.56819	stage	Time 0
		MUC3A	2.72729	3.28196	8.61228	4.92599e-06	0.000179523	4.56792	stage	Time 0
		DNASE2	1.84515	4.37095	7.77168	5.05092e-06	0.00018323	4.56266	stage	Time 0
		UBA52	-1.04923	11.245	-8.85275	5.05726e-06	0.00018323	-4.5624	stage	Time 0
		SP140L	-2.51571	1.49931	-8.27865	5.12305e-06	0.00018497	-4.55968	stage	Time 0
		ATP6V1E2	2.31872	1.60606	7.75902	5.13516e-06	0.00018497	4.55919	stage	Time 0
		NLE1	-1.38094	6.23366	-8.7816	5.15298e-06	0.000185074	-4.55846	stage	Time 0
		CCNI	0.550479	9.35646	8.48562	5.32321e-06	0.000190636	4.55163	stage	Time 0
		GANC	-0.992043	2.95217	-7.72726	5.35319e-06	0.000191157	-4.55045	stage	Time 0
		DDX59	1.9271	3.13907	8.44866	5.38183e-06	0.000191627	4.54932	stage	Time 0
		ENO3	-1.55821	4.09977	-7.70161	5.53651e-06	0.000196107	-4.54336	stage	Time 0
		TATDN3	1.29829	4.29277	7.70123	5.5393e-06	0.000196107	4.54325	stage	Time 0
		MLX	0.810915	5.77882	7.6978	5.56435e-06	0.000196433	4.5423	stage	Time 0
		PCDHB2	1.58719	3.0052	8.3647	5.62098e-06	0.000197868	4.54017	stage	Time 0
		MEGF6	-0.831933	2.58873	-7.68249	5.67751e-06	0.000199262	-4.53806	stage	Time 0
		MTUS1	1.85677	0.770075	7.68046	5.69274e-06	0.000199262	4.53749	stage	Time 0
		ZSCAN26	2.30904	1.27072	8.50375	5.75464e-06	0.000200187	4.53521	stage	Time 0
		MOCS1	-0.72759	3.41796	-7.67136	5.76136e-06	0.000200187	-4.53496	stage	Time 0
		SPART	2.93125	4.92506	8.52623	5.77344e-06	0.000200187	4.53452	stage	Time 0
		SLC18B1	2.09695	3.42377	8.29681	5.78378e-06	0.000200187	4.53414	stage	Time 0
		C12orf49	-0.904528	6.18939	-8.71112	5.90266e-06	0.000203732	-4.52985	stage	Time 0
		LARP4	-0.678625	6.29059	-8.75534	5.94854e-06	0.000204745	-4.52821	stage	Time 0
		RBM3	-0.876442	8.97692	-8.68169	6.0254e-06	0.000206817	-4.5255	stage	Time 0
		ASIC2	-4.05816	0.889134	-10.0018	6.15103e-06	0.000210546	-4.52113	stage	Time 0
		SLC10A4	1.25386	2.53553	7.60829	6.26217e-06	0.000213308	4.51734	stage	Time 0
		TEX10	-0.673229	5.77259	-7.60682	6.27437e-06	0.000213308	-4.51693	stage	Time 0
		ZNF385D	2.12039	2.04062	7.60574	6.2834e-06	0.000213308	4.51662	stage	Time 0
		PLA2G4B	-1.95259	0.82891	-7.5812	6.49134e-06	0.000219765	-4.50972	stage	Time 0
		SPAST	-0.57061	4.66876	-8.14837	6.6014e-06	0.000222103	-4.50615	stage	Time 0
		AAGAB	-0.705942	5.1305	-7.56753	6.61038e-06	0.000222103	-4.50586	stage	Time 0
		SMARCE1	-0.566253	6.58854	-8.55914	6.61416e-06	0.000222103	-4.50574	stage	Time 0
		PDPR	1.35265	4.44227	7.55192	6.74924e-06	0.000225843	4.50145	stage	Time 0
		SLC25A43	1.73647	1.5609	8.48668	6.76198e-06	0.000225843	4.50105	stage	Time 0
		SLC25A36	0.700218	6.05813	7.54108	6.84744e-06	0.000227483	4.49838	stage	Time 0
		MSRB2	1.94595	5.57867	8.50704	6.84781e-06	0.000227483	4.49836	stage	Time 0
		PBX2	-1.16799	5.7174	-7.53581	6.89568e-06	0.000228461	-4.49688	stage	Time 0
		DNAH14	0.976298	4.95193	8.4104	6.9384e-06	0.000229263	4.49557	stage	Time 0
		RAB33B	-1.03414	3.40264	-7.51452	7.09459e-06	0.000233801	-4.49083	stage	Time 0
		SOX7	-1.48887	1.71695	-8.73161	7.16515e-06	0.0002355	-4.48872	stage	Time 0
		UTRN	1.43749	4.65929	8.13732	7.21613e-06	0.000236548	4.48721	stage	Time 0
		HSPB6	-3.55815	0.233795	-9.37487	7.34756e-06	0.00024022	-4.48336	stage	Time 0
		B3GNT8	-1.54005	1.17458	-7.48093	7.42087e-06	0.000241979	-4.48125	stage	Time 0
		LINC00672	-2.78157	4.36976	-7.47552	7.47481e-06	0.000243098	-4.4797	stage	Time 0
		GRK6	0.674279	5.71045	14.4701	7.50975e-06	0.00024327	4.4787	stage	Time 0
		ZNF611	-3.00271	1.58145	-8.41971	7.51936e-06	0.00024327	-4.47843	stage	Time 0
		ARHGDIG	2.03132	1.88162	7.469	7.54049e-06	0.000243318	4.47783	stage	Time 0
		PROM1	-2.10982	5.78786	-10.1092	7.67504e-06	0.000247017	-4.47405	stage	Time 0
		PARM1	2.63689	0.407511	7.70357	7.72804e-06	0.000248078	4.47258	stage	Time 0
		DEXI	1.00402	5.2263	8.36576	7.75091e-06	0.000248169	4.47195	stage	Time 0
		ARVCF	-0.702169	3.82411	-8.38207	8.00361e-06	0.0002556	-4.46509	stage	Time 0
		ZNF212	-0.573029	3.97101	-7.42009	8.05323e-06	0.000256523	-4.46376	stage	Time 0
		ACOT11	-1.64016	1.39698	-7.93966	8.08307e-06	0.000256814	-4.46297	stage	Time 0
		PAPSS2	-1.01961	3.99709	-7.4127	8.13395e-06	0.000257769	-4.46163	stage	Time 0
		SENP3	-2.15958	3.8226	-7.82917	8.15524e-06	0.000257785	-4.46107	stage	Time 0
		DACT3	-1.60552	1.95556	-7.40877	8.17711e-06	0.000257818	-4.46049	stage	Time 0
		SPATA2L	1.46945	2.80651	8.00171	8.21061e-06	0.000258217	4.45962	stage	Time 0
		CFAP46	-1.40671	2.38369	-7.39826	8.29397e-06	0.000260179	-4.45745	stage	Time 0
		STK11	0.785043	5.29201	7.8556	8.56124e-06	0.000267538	4.45065	stage	Time 0
		PIP4P2	2.53451	5.25689	8.27002	8.57175e-06	0.000267538	4.45038	stage	Time 0
		FBXW8	-0.939613	3.86192	-7.37171	8.59723e-06	0.000267659	-4.44974	stage	Time 0
		JMJD7-PLA2G4B	-2.42476	0.0931908	-8.21279	8.76769e-06	0.000272282	-4.44553	stage	Time 0
		ZNF517	1.62867	0.323124	7.35357	8.81119e-06	0.00027249	4.44446	stage	Time 0
		ASF1B	-0.973145	5.42998	-7.35272	8.82132e-06	0.00027249	-4.44422	stage	Time 0
		EEF1AKNMT	1.23306	5.14608	7.35113	8.84036e-06	0.00027249	4.44375	stage	Time 0
		SLC66A2	1.68943	3.58991	8.14832	9.12798e-06	0.000280657	4.43686	stage	Time 0
		FAM3B	2.58631	0.821885	8.31931	9.1636e-06	0.000281055	4.43602	stage	Time 0
		GTF2A2	0.49456	8.36571	7.32064	9.21412e-06	0.0002817	4.43484	stage	Time 0
		TTC38	-0.994946	4.53909	-8.10768	9.25725e-06	0.0002817	-4.43383	stage	Time 0
		C2orf72	-2.43246	0.56	-7.31684	9.26187e-06	0.0002817	-4.43373	stage	Time 0
		ETFBKMT	-1.43249	1.80401	-8.06531	9.27556e-06	0.0002817	-4.43341	stage	Time 0
		ZNF81	1.69287	1.8453	8.34912	9.33068e-06	0.000282681	4.43213	stage	Time 0
		TPD52	1.31025	5.08166	7.30942	9.3559e-06	0.000282754	4.43155	stage	Time 0
		SNX14	-0.919248	4.25079	-7.30525	9.40927e-06	0.000283605	-4.43032	stage	Time 0
		DOCK6	-1.27471	3.58996	-7.30364	9.42986e-06	0.000283605	-4.42985	stage	Time 0
		EMILIN1	-1.93215	1.80726	-7.60264	9.55687e-06	0.000286729	-4.42696	stage	Time 0
		ANAPC10	1.0456	5.29228	7.29162	9.58559e-06	0.000286896	4.42632	stage	Time 0
		SAT2	-1.01774	7.99717	-7.28572	9.66316e-06	0.00028813	-4.42458	stage	Time 0
		KREMEN2	2.55283	1.52347	7.39005	9.6733e-06	0.00028813	4.42435	stage	Time 0
		TMEM134	-0.908967	6.78569	-7.27496	9.80612e-06	0.000291385	-4.42141	stage	Time 0
		CELF2	1.63119	4.94717	8.73195	1.00432e-05	0.000297021	4.41624	stage	Time 0
		EXOC1	-0.81125	4.63139	-7.25724	1.00465e-05	0.000297021	-4.41617	stage	Time 0
		CRACR2B	2.17329	4.42769	7.2557	1.00677e-05	0.000297021	4.41571	stage	Time 0
		SSC4D	1.20177	2.48901	7.23898	1.03008e-05	0.000303177	4.41076	stage	Time 0
		PGAP3	-1.11842	2.80894	-8.1194	1.05194e-05	0.000308546	-4.40621	stage	Time 0
		BORCS5	-0.656733	4.21776	-7.22273	1.0533e-05	0.000308546	-4.40593	stage	Time 0
		ERCC6L	-0.838178	4.81389	-7.2089	1.0735e-05	0.000313284	-4.40181	stage	Time 0
		TMEM248	0.594726	5.61226	7.2082	1.07453e-05	0.000313284	4.4016	stage	Time 0
		DUSP28	-0.849953	2.97878	-8.12505	1.0925e-05	0.000316412	-4.39801	stage	Time 0
		ERI2	-0.760086	3.15874	-7.19553	1.09341e-05	0.000316412	-4.39782	stage	Time 0
		ABHD1	-2.54604	0.689203	-7.79871	1.09481e-05	0.000316412	-4.39755	stage	Time 0
		TTC39C	1.71115	4.82116	7.19416	1.09548e-05	0.000316412	4.39741	stage	Time 0
		UTP11	1.12195	6.1273	7.19079	1.10056e-05	0.00031714	4.39641	stage	Time 0
		ZNF17	-1.27137	2.90492	-7.18445	1.11022e-05	0.000319182	-4.39451	stage	Time 0
		GCSH	-1.19866	9.93325	-7.96227	1.12107e-05	0.000321556	-4.3924	stage	Time 0
		PCBD1	1.53663	6.42093	7.82316	1.13246e-05	0.000324071	4.3902	stage	Time 0
		S100A4	4.06001	4.36938	7.23716	1.13807e-05	0.000324926	4.38913	stage	Time 0
		ZNF71	1.44366	3.59639	8.50784	1.14833e-05	0.000327102	4.38717	stage	Time 0
		C10orf88	0.977589	2.39583	8.17916	1.15633e-05	0.000328627	4.38566	stage	Time 0
		VPS33B	-0.758514	3.12805	-7.1438	1.17427e-05	0.000332959	-4.38231	stage	Time 0
		SLC35G2	2.3642	1.31531	7.5818	1.19045e-05	0.000336778	4.37933	stage	Time 0
		GRID2	2.58106	5.22889	7.11573	1.22078e-05	0.000344572	4.37384	stage	Time 0
		STK33	2.28477	2.88394	7.48193	1.22495e-05	0.000344963	4.3731	stage	Time 0
		RHOV	1.96478	1.24945	7.5612	1.22992e-05	0.000345577	4.37222	stage	Time 0
		LYN	-1.3801	6.31565	-7.10578	1.23773e-05	0.000346985	-4.37083	stage	Time 0
		TEX14	2.8493	1.08145	7.73992	1.24789e-05	0.000349042	4.36905	stage	Time 0
		CHST12	0.838752	4.78014	7.09308	1.25974e-05	0.000351565	4.36698	stage	Time 0
		DAAM2	-1.5358	1.88018	-7.86178	1.26415e-05	0.000352002	-4.36622	stage	Time 0
		APBA3	-1.14468	3.65319	-7.84012	1.27934e-05	0.000355432	-4.36361	stage	Time 0
		PNPLA4	2.09361	4.06038	7.98243	1.28375e-05	0.00035586	4.36286	stage	Time 0
		KNDC1	-1.05771	2.71127	-7.07771	1.28694e-05	0.000355948	-4.36231	stage	Time 0
		FUBP1	-0.640884	6.69746	-7.07246	1.29637e-05	0.000357759	-4.36072	stage	Time 0
		PHF19	2.10343	4.96435	7.75613	1.31291e-05	0.000361105	4.35794	stage	Time 0
		ZNF544	-1.14524	5.80121	-8.11005	1.31465e-05	0.000361105	-4.35765	stage	Time 0
		OSGEPL1	-1.51521	4.05383	-7.06002	1.31901e-05	0.000361105	-4.35693	stage	Time 0
		SLFN13	2.7342	0.818789	7.71465	1.32015e-05	0.000361105	4.35674	stage	Time 0
		SPOUT1	-1.26557	5.71887	-7.05391	1.3303e-05	0.000363077	-4.35506	stage	Time 0
		SKI	-1.14188	5.05286	-7.05143	1.33489e-05	0.000363531	-4.35431	stage	Time 0
		PRKCZ	0.6488	4.41948	7.04831	1.34071e-05	0.000364277	4.35335	stage	Time 0
		DMWD	0.750116	4.26268	7.04682	1.34351e-05	0.000364277	4.3529	stage	Time 0
		TMEM130	-3.76803	0.268063	-7.03993	1.35649e-05	0.000366992	-4.35079	stage	Time 0
		ENPP5	-1.7212	3.40524	-7.03703	1.36198e-05	0.000367674	-4.3499	stage	Time 0
		MDFIC	1.90754	2.75884	7.20836	1.36499e-05	0.000367688	4.34942	stage	Time 0
		INO80E	-0.78886	6.30848	-7.46291	1.38985e-05	0.000373005	-4.34546	stage	Time 0
		C7orf31	-1.32014	0.970463	-7.77029	1.39075e-05	0.000373005	-4.34532	stage	Time 0
		PI4K2A	-0.503349	3.80558	-7.01284	1.40881e-05	0.00037703	-4.34248	stage	Time 0
		HHAT	-2.66737	0.252095	-7.41174	1.4134e-05	0.000377446	-4.34177	stage	Time 0
		SLC4A11	1.47927	2.1173	7.73011	1.4465e-05	0.000384849	4.33668	stage	Time 0
		DERA	-1.62873	6.19563	-8.32675	1.44734e-05	0.000384849	-4.33655	stage	Time 0
		BSDC1	1.71412	4.06129	8.74917	1.45182e-05	0.000385215	4.33587	stage	Time 0
		DDX17	-0.913782	8.3854	-7.98343	1.45731e-05	0.000385844	-4.33504	stage	Time 0
		LRRCC1	0.994246	3.53556	6.9844	1.46606e-05	0.000386587	4.33373	stage	Time 0
		ICA1	1.76764	4.38325	7.63835	1.46635e-05	0.000386587	4.33368	stage	Time 0
		ATP6V1C1	1.03241	5.33894	7.79422	1.47925e-05	0.000389159	4.33176	stage	Time 0
		B4GALT4	1.56706	4.71755	9.02048	1.49754e-05	0.000393135	4.32905	stage	Time 0
		ZKSCAN3	0.57604	2.0611	6.9551	1.52764e-05	0.000400189	4.32467	stage	Time 0
		SLC52A2	1.09086	5.98801	6.95164	1.5351e-05	0.000401295	4.32359	stage	Time 0
		CTDSP1	0.675105	3.35877	6.94954	1.53964e-05	0.000401635	4.32294	stage	Time 0
		IKBKG	1.0172	3.52398	6.94727	1.54455e-05	0.00040207	4.32224	stage	Time 0
		RAB3GAP1	-0.441314	5.00428	-6.94572	1.54794e-05	0.000402109	-4.32175	stage	Time 0
		ZNF800	1.28441	1.87153	6.94142	1.55733e-05	0.000403699	4.32042	stage	Time 0
		PPIP5K2	-1.64759	5.58964	-7.75028	1.5885e-05	0.000410922	-4.31604	stage	Time 0
		STEAP1B	3.29606	1.70953	7.10975	1.59832e-05	0.00041176	4.31468	stage	Time 0
		CNOT7	0.348698	7.66569	6.92295	1.59839e-05	0.00041176	4.31467	stage	Time 0
		PAXX	1.05907	6.612	7.74167	1.60379e-05	0.000412295	4.31393	stage	Time 0
		SLC10A5	-4.3961	0.563545	-7.73039	1.64905e-05	0.000422638	-4.30777	stage	Time 0
		CENPBD1	1.07746	3.06042	6.90008	1.65085e-05	0.000422638	4.30753	stage	Time 0
		CAND2	-1.46733	3.27997	-6.89836	1.65487e-05	0.000422794	-4.307	stage	Time 0
		CBR3	4.32619	1.22461	7.34721	1.66018e-05	0.000423277	4.30629	stage	Time 0
		SLC25A18	-1.85994	2.67487	-7.74099	1.66609e-05	0.000423912	-4.3055	stage	Time 0
		ENPP1	1.91157	4.4093	6.8902	1.67408e-05	0.000425073	4.30444	stage	Time 0
		SUPT20H	0.411482	5.87759	6.8724	1.71681e-05	0.00043503	4.29886	stage	Time 0
		POLG2	-0.914087	4.87121	-6.84926	1.77409e-05	0.000448628	-4.29158	stage	Time 0
		ROM1	1.38616	0.173829	7.2956	1.79654e-05	0.00045338	4.28878	stage	Time 0
		CEP19	-0.848508	2.81684	-6.83277	1.81614e-05	0.000457394	-4.28637	stage	Time 0
		ZNF283	-2.5056	2.1053	-7.61988	1.85115e-05	0.00046503	-4.28213	stage	Time 0
		GTF2A1	-0.508811	5.29107	-6.81687	1.8577e-05	0.00046503	-4.28134	stage	Time 0
		RBFA	-1.47537	6.94738	-7.96219	1.85772e-05	0.00046503	-4.28134	stage	Time 0
		ARMC2	-1.94335	1.64971	-7.6681	1.863e-05	0.000465413	-4.28071	stage	Time 0
		REX1BD	-1.3784	8.47705	-7.56417	1.8712e-05	0.000466519	-4.27973	stage	Time 0
		HPS6	0.851123	3.37733	8.20423	1.88801e-05	0.000468862	4.27774	stage	Time 0
		MSRA	-1.76094	4.592	-8.16989	1.88816e-05	0.000468862	-4.27772	stage	Time 0
		CYSTM1	1.27969	5.83978	6.79317	1.92155e-05	0.000476198	4.27382	stage	Time 0
		ARL9	2.86208	0.154401	7.54596	1.95832e-05	0.000483442	4.26959	stage	Time 0
		TOR3A	1.38627	4.9299	8.36971	1.95858e-05	0.000483442	4.26956	stage	Time 0
		ATRIP	0.918156	3.02494	6.77694	1.96661e-05	0.000483683	4.26865	stage	Time 0
		ATG9B	1.23188	0.344969	7.58572	1.96736e-05	0.000483683	4.26856	stage	Time 0
		MBP	2.21483	3.25394	7.04014	2.02227e-05	0.000496197	4.26242	stage	Time 0
		HPS4	-0.927035	5.05578	-6.75458	2.03056e-05	0.000497117	-4.2615	stage	Time 0
		TMEM260	-0.545499	3.73051	-7.55418	2.03404e-05	0.000497117	-4.26112	stage	Time 0
		SETX	-0.792179	6.01388	-8.40262	2.08458e-05	0.000507747	-4.25563	stage	Time 0
		CEP162	-0.888205	4.10886	-6.73588	2.08573e-05	0.000507747	-4.25551	stage	Time 0
		AANAT	-2.13078	0.401237	-7.23812	2.09864e-05	0.000509887	-4.25413	stage	Time 0
		PRR22	1.72518	0.709144	6.72936	2.10534e-05	0.000510513	4.25342	stage	Time 0
		TRIM47	1.42028	2.02789	7.32843	2.1456e-05	0.000518338	4.24917	stage	Time 0
		APPBP2	-0.757314	3.65457	-6.71605	2.14597e-05	0.000518338	-4.24914	stage	Time 0
		SNRNP40	1.42393	6.92506	7.4211	2.16036e-05	0.000520797	4.24764	stage	Time 0
		PRR3	-0.695695	4.15461	-7.44186	2.16574e-05	0.000521081	-4.24708	stage	Time 0
		TPMT	0.657815	5.31097	7.35142	2.19642e-05	0.000527439	4.24393	stage	Time 0
		STAMBP	-0.625205	5.92779	-7.55121	2.22271e-05	0.00053272	-4.24126	stage	Time 0
		SLC25A29	0.721573	5.58657	6.68655	2.23904e-05	0.000534886	4.23961	stage	Time 0
		AP4B1	-0.951263	2.43675	-6.68613	2.24038e-05	0.000534886	-4.23948	stage	Time 0
		TNS2	-1.54985	1.4889	-6.67897	2.26366e-05	0.000539404	-4.23716	stage	Time 0
		TMEM159	-1.5042	5.84317	-7.15014	2.27206e-05	0.000540367	-4.23633	stage	Time 0
		RIPOR2	3.61974	2.48656	6.80181	2.32954e-05	0.000552975	4.23071	stage	Time 0
		JAZF1	2.27342	2.56203	7.21754	2.34272e-05	0.000555041	4.22944	stage	Time 0
		TIMM21	-0.808684	4.93482	-7.34384	2.35717e-05	0.0005574	-4.22806	stage	Time 0
		SGCB	1.05497	5.33249	6.64859	2.36518e-05	0.000558229	4.22729	stage	Time 0
		AP1S1	1.11924	6.82908	7.45898	2.38918e-05	0.000562819	4.22502	stage	Time 0
		C2orf15	0.940468	2.77978	6.63884	2.3988e-05	0.000564013	4.22412	stage	Time 0
		PLPP5	1.10838	5.64591	7.42198	2.4144e-05	0.000566608	4.22266	stage	Time 0
		TPST1	-0.850097	4.09638	-6.631	2.42618e-05	0.000568295	-4.22156	stage	Time 0
		WDR7	-1.13845	2.6293	-7.53401	2.44932e-05	0.000572632	-4.21942	stage	Time 0
		ISOC2	1.24881	7.32754	7.3396	2.47975e-05	0.000578654	4.21664	stage	Time 0
		ATG16L1	-0.628931	3.73607	-7.38072	2.49458e-05	0.000581022	-4.21529	stage	Time 0
		MRPL45	0.604007	6.34382	7.70645	2.50207e-05	0.000581672	4.21461	stage	Time 0
		FBXW5	0.546065	6.04545	6.60624	2.51487e-05	0.000583554	4.21346	stage	Time 0
		GEMIN5	-0.877052	5.3245	-6.60149	2.53226e-05	0.000586491	-4.2119	stage	Time 0
		MCOLN3	2.91953	0.336355	6.59862	2.54287e-05	0.00058785	4.21096	stage	Time 0
		SLC38A9	-0.857777	4.56704	-7.18168	2.56292e-05	0.00059138	-4.20919	stage	Time 0
		ACCS	-1.59673	1.3706	-6.58664	2.58754e-05	0.000595952	-4.20703	stage	Time 0
		DUSP9	-1.11464	1.10784	-6.581	2.60884e-05	0.000597879	-4.20517	stage	Time 0
		IFT27	1.13148	5.15408	7.75172	2.61001e-05	0.000597879	4.20507	stage	Time 0
		MTARC2	-1.17175	3.8093	-6.5806	2.61038e-05	0.000597879	-4.20504	stage	Time 0
		DPYSL3	1.78176	6.78103	7.48258	2.6448e-05	0.000604644	4.20207	stage	Time 0
		CEP85	-0.664365	3.80972	-6.56562	2.66793e-05	0.00060881	-4.2001	stage	Time 0
		TANGO6	-1.13817	3.7692	-6.56287	2.67865e-05	0.000610131	-4.1992	stage	Time 0
		NDUFS1	-0.533919	5.88426	-7.21226	2.68488e-05	0.000610429	-4.19867	stage	Time 0
		TUBB3	2.08854	8.32327	6.55365	2.7149e-05	0.000615151	4.19615	stage	Time 0
		BICDL2	1.15759	3.23624	7.09124	2.71558e-05	0.000615151	4.19609	stage	Time 0
		SPPL2B	-0.553545	4.46266	-6.54687	2.7419e-05	0.000619979	-4.19391	stage	Time 0
		NIBAN2	-0.897221	4.27349	-6.54546	2.74757e-05	0.00062013	-4.19344	stage	Time 0
		ZNF154	-0.832096	2.95126	-7.2641	2.77911e-05	0.000625658	-4.19085	stage	Time 0
		PPP2R1B	-1.03952	5.98594	-7.22401	2.78977e-05	0.000625658	-4.18998	stage	Time 0
		ADGRA2	-2.22492	1.3779	-7.11248	2.791e-05	0.000625658	-4.18988	stage	Time 0
		ZFYVE19	0.901107	3.24444	7.19803	2.79226e-05	0.000625658	4.18978	stage	Time 0
		CCDC172	2.78923	0.46202	6.82126	2.82195e-05	0.000631169	4.18738	stage	Time 0
		LARP4B	-0.837524	5.08987	-7.96809	2.84223e-05	0.000634195	-4.18575	stage	Time 0
		ACOXL	2.19062	1.52163	6.87859	2.84571e-05	0.000634195	4.18547	stage	Time 0
		CASP2	-0.836171	4.61726	-7.59554	2.87996e-05	0.000640674	-4.18276	stage	Time 0
		TIGD4	1.48311	0.0769191	7.38562	2.8874e-05	0.000641179	4.18217	stage	Time 0
		EIF5A2	1.2382	3.46936	6.90344	2.90474e-05	0.000642906	4.18081	stage	Time 0
		ATP5MC2	-0.948535	10.3775	-7.83525	2.90556e-05	0.000642906	-4.18074	stage	Time 0
		WDR13	0.649502	4.46807	6.48641	2.99563e-05	0.000661654	4.1738	stage	Time 0
		HES6	1.27048	6.27054	6.47473	3.04744e-05	0.000671901	4.16989	stage	Time 0
		CDR2	0.995553	4.13061	7.25381	3.06578e-05	0.000673666	4.16852	stage	Time 0
		ZNF197	-0.835559	3.69795	-7.6099	3.06632e-05	0.000673666	-4.16848	stage	Time 0
		CASTOR3	2.47279	1.78031	7.03827	3.11139e-05	0.000682359	4.16516	stage	Time 0
		RNPEP	1.29326	5.46954	7.11427	3.12044e-05	0.000683133	4.16449	stage	Time 0
		ZNF528	-3.23725	1.06923	-6.45706	3.12771e-05	0.000683518	-4.16396	stage	Time 0
		HMGN1	-0.648085	10.7536	-6.4507	3.1571e-05	0.000688726	-4.16183	stage	Time 0
		GSTM4	-2.20769	1.69745	-8.31124	3.16591e-05	0.000689434	-4.16119	stage	Time 0
		SCCPDH	1.56232	5.40675	7.34561	3.18451e-05	0.000691067	4.15985	stage	Time 0
		FBXO25	1.94484	2.23421	6.70922	3.18456e-05	0.000691067	4.15985	stage	Time 0
		CD53	-2.49995	0.428929	-6.43738	3.2197e-05	0.00069747	-4.15734	stage	Time 0
		LAG3	-1.62201	2.01398	-6.43184	3.24614e-05	0.000700846	-4.15547	stage	Time 0
		NUDT13	-1.22485	1.80571	-6.43174	3.24659e-05	0.000700846	-4.15544	stage	Time 0
		LRRC20	-1.406	4.00746	-6.43012	3.25436e-05	0.000701301	-4.1549	stage	Time 0
		RAD51B	-0.924266	2.40973	-6.78179	3.29093e-05	0.00070795	-4.15234	stage	Time 0
		FAM120B	-1.24963	3.13587	-6.41119	3.34661e-05	0.000718023	-4.1485	stage	Time 0
		H2AX	-1.23703	8.36823	-6.41064	3.34934e-05	0.000718023	-4.14831	stage	Time 0
		ESPL1	-0.916176	3.80112	-7.08524	3.36446e-05	0.000720017	-4.14728	stage	Time 0
		RABL2B	1.45481	2.7338	7.02961	3.3907e-05	0.000724383	4.1455	stage	Time 0
		PIGT	0.621538	5.80148	7.09729	3.42882e-05	0.000731265	4.14294	stage	Time 0
		CATSPER2	-1.63725	0.142184	-6.39232	3.44135e-05	0.000732676	-4.1421	stage	Time 0
		DCTPP1	1.59537	6.80692	6.38592	3.47413e-05	0.000738386	4.13993	stage	Time 0
		SLC25A21	-1.40377	4.92837	-6.38001	3.50467e-05	0.000743603	-4.13792	stage	Time 0
		NMNAT1	-1.51036	2.70779	-6.37495	3.53107e-05	0.000747922	-4.1362	stage	Time 0
		ZNF174	1.08498	2.66377	6.68218	3.5571e-05	0.000752151	4.13451	stage	Time 0
		ZFYVE26	-0.740766	3.19531	-6.36354	3.59139e-05	0.000758107	-4.13231	stage	Time 0
		DNAJB14	0.404683	5.12661	6.35991	3.61079e-05	0.000760524	4.13107	stage	Time 0
		CLCN4	-1.22835	2.51541	-6.3591	3.61511e-05	0.000760524	-4.13079	stage	Time 0
		VMA21	0.570895	6.23083	6.76111	3.62191e-05	0.000760663	4.13036	stage	Time 0
		OARD1	-0.912608	7.18112	-6.3558	3.63289e-05	0.000761678	-4.12967	stage	Time 0
		ERMAP	0.988142	0.862121	6.35194	3.65377e-05	0.000764761	4.12835	stage	Time 0
		SS18	-0.522651	6.11753	-6.75813	3.67994e-05	0.00076894	-4.12671	stage	Time 0
		CACTIN	-0.824527	4.08064	-6.86023	3.69767e-05	0.000771344	-4.1256	stage	Time 0
		NMD3	-0.660962	5.37231	-7.03909	3.70497e-05	0.000771567	-4.12515	stage	Time 0
		SESN2	3.03942	3.86709	6.9069	3.72573e-05	0.00077459	4.12386	stage	Time 0
		EMC1	-0.853176	5.01179	-7.01871	3.73838e-05	0.000775917	-4.12308	stage	Time 0
		TMEM18	0.592893	5.71217	6.33248	3.76109e-05	0.000778443	4.12169	stage	Time 0
		IL17RE	2.31728	1.7396	6.33212	3.76311e-05	0.000778443	4.12156	stage	Time 0
		LDB3	-1.94224	0.10984	-6.33001	3.77495e-05	0.00077959	-4.12084	stage	Time 0
		PPP1R14A	2.45754	4.46851	6.64602	3.78263e-05	0.000779877	4.12037	stage	Time 0
		MPI	-0.922544	4.88109	-7.01809	3.85275e-05	0.00078965	-4.11614	stage	Time 0
		MAPK1	-0.554626	5.87423	-7.71819	3.85528e-05	0.00078965	-4.11599	stage	Time 0
		KBTBD2	-0.859702	4.65046	-6.78402	3.85626e-05	0.00078965	-4.11593	stage	Time 0
		HTRA3	0.965198	0.936585	6.31383	3.86706e-05	0.00078965	4.11528	stage	Time 0
		DDX25	1.7269	2.91597	6.31363	3.86822e-05	0.00078965	4.11521	stage	Time 0
		LZTR1	-0.912551	3.2255	-7.03621	3.86827e-05	0.00078965	-4.11521	stage	Time 0
		SDF4	0.870069	5.70901	6.96694	3.9266e-05	0.000800238	4.11176	stage	Time 0
		ZNF445	-0.601984	4.08951	-9.1053	3.9356e-05	0.000800756	-4.11123	stage	Time 0
		ZNF570	0.997325	1.87824	6.29676	3.96685e-05	0.000805791	4.1094	stage	Time 0
		TGFBI	-1.18493	1.8369	-6.78363	3.9811e-05	0.000806098	-4.10857	stage	Time 0
		SMAD1	1.00438	4.45136	6.93555	3.98137e-05	0.000806098	4.10856	stage	Time 0
		RHNO1	0.855423	5.66921	6.29225	3.99365e-05	0.000807265	4.10785	stage	Time 0
		DNAL4	1.20295	3.1691	6.28945	4.01042e-05	0.000808759	4.10688	stage	Time 0
		N4BP2L1	-1.65461	1.94274	-6.28883	4.0141e-05	0.000808759	-4.10667	stage	Time 0
		DCAF1	-0.715137	4.27736	-7.38927	4.02487e-05	0.000809096	-4.10605	stage	Time 0
		PDHA1	1.24303	6.64994	6.91743	4.02883e-05	0.000809096	4.10582	stage	Time 0
		TNIP2	0.806754	5.88316	6.28078	4.06271e-05	0.000813257	4.10388	stage	Time 0
		PCGF5	1.97773	3.91932	6.77269	4.07092e-05	0.000813257	4.10342	stage	Time 0
		DHRS11	-1.21492	5.53981	-6.27889	4.07424e-05	0.000813257	-4.10323	stage	Time 0
		C11orf1	0.928117	5.5655	6.27863	4.0758e-05	0.000813257	4.10314	stage	Time 0
		TOP3B	-0.472974	4.09548	-6.27483	4.09905e-05	0.00081561	-4.10182	stage	Time 0
		SF3B3	-0.810287	6.6998	-7.67008	4.10528e-05	0.00081561	-4.10147	stage	Time 0
		EI24	1.17618	8.10371	6.92389	4.10734e-05	0.00081561	4.10136	stage	Time 0
		TTC19	0.534127	6.1056	6.88081	4.14394e-05	0.00082156	4.0993	stage	Time 0
		DBNDD1	1.67644	4.86052	6.77378	4.17964e-05	0.000827315	4.09732	stage	Time 0
		FNDC5	-1.55857	1.59028	-6.43147	4.23061e-05	0.000833384	-4.09451	stage	Time 0
		L1CAM	2.19171	1.69922	6.2531	4.2347e-05	0.000833384	4.09429	stage	Time 0
		NUDT15	2.12583	6.27202	6.88512	4.24048e-05	0.000833384	4.09397	stage	Time 0
		MEIG1	-3.60146	1.04361	-6.80024	4.24631e-05	0.000833384	-4.09365	stage	Time 0
		OGFRL1	1.90694	3.06537	6.67066	4.24985e-05	0.000833384	4.09346	stage	Time 0
		SCAF8	-0.723059	4.96593	-6.81308	4.25777e-05	0.000833384	-4.09303	stage	Time 0
		SNX25	1.94702	1.48908	6.24882	4.26197e-05	0.000833384	4.0928	stage	Time 0
		COL6A2	2.30392	3.67014	7.81565	4.2641e-05	0.000833384	4.09268	stage	Time 0
		KYNU	-2.88814	0.115854	-6.87033	4.33638e-05	0.000846174	-4.08879	stage	Time 0
		BBS7	-0.808874	5.70567	-6.60296	4.35571e-05	0.00084861	-4.08775	stage	Time 0
		C9orf78	0.539522	6.54222	6.23183	4.37203e-05	0.000850453	4.08689	stage	Time 0
		RNF126	0.485668	6.7728	6.22775	4.39898e-05	0.000854329	4.08546	stage	Time 0
		LAYN	2.32697	2.08524	6.59825	4.40575e-05	0.000854329	4.0851	stage	Time 0
		PPDPF	0.798297	8.27446	6.98534	4.44218e-05	0.000860048	4.08319	stage	Time 0
		STUB1	0.751594	7.77577	6.21948	4.45399e-05	0.000860989	4.08257	stage	Time 0
		NF2	-0.837648	4.99756	-6.7987	4.48824e-05	0.000866257	-4.08079	stage	Time 0
		CPNE7	2.62111	1.8257	6.21112	4.51034e-05	0.000868104	4.07965	stage	Time 0
		ANKRD42	-0.713869	2.23612	-6.68713	4.51182e-05	0.000868104	-4.07957	stage	Time 0
		ATAT1	-0.527135	4.44488	-6.20375	4.56072e-05	0.000876152	-4.07707	stage	Time 0
		BX255925.3	-0.782622	3.84854	-6.63374	4.57145e-05	0.000876856	-4.07652	stage	Time 0
		DAPK2	1.3896	0.424415	6.85272	4.59643e-05	0.000880284	4.07525	stage	Time 0
		MCOLN1	0.656609	3.87728	6.19314	4.6342e-05	0.000885139	4.07335	stage	Time 0
		PHKA1	2.25057	0.897188	6.82363	4.63997e-05	0.000885139	4.07306	stage	Time 0
		FUS	-0.526626	8.90987	-6.54932	4.64321e-05	0.000885139	-4.0729	stage	Time 0
		ZNF497	-1.37459	1.13301	-7.15322	4.7543e-05	0.000904923	-4.06739	stage	Time 0
		TJP1	0.589524	7.25338	6.88543	4.78627e-05	0.000909611	4.06583	stage	Time 0
		ZNF670-ZNF695	1.5045	0.149247	6.16255	4.85326e-05	0.00092093	4.06258	stage	Time 0
		RIT2	3.54921	1.40829	6.15682	4.89547e-05	0.00092752	4.06056	stage	Time 0
		TMEM30B	2.38107	1.92415	6.1523	4.92913e-05	0.00093247	4.05896	stage	Time 0
		C2orf92	-1.87617	0.830647	-8.00645	4.95084e-05	0.000935151	-4.05794	stage	Time 0
		PTGES3L	-1.15347	3.28453	-7.2529	4.96689e-05	0.000935723	-4.05718	stage	Time 0
		GRIN1	-2.11594	1.2065	-6.14698	4.96898e-05	0.000935723	-4.05708	stage	Time 0
		ABHD8	-0.708659	4.95372	-6.91799	4.99916e-05	0.000937069	-4.05567	stage	Time 0
		OPLAH	-0.986213	2.94685	-6.14229	5.00439e-05	0.000937069	-4.05542	stage	Time 0
		ELP4	-0.81392	4.73739	-6.84815	5.00598e-05	0.000937069	-4.05535	stage	Time 0
		PPP2R2A	-0.272478	7.08827	-6.14203	5.00637e-05	0.000937069	-4.05533	stage	Time 0
		SH3YL1	1.41159	4.56391	6.13873	5.03143e-05	0.000940338	4.05416	stage	Time 0
		XPO7	-1.02102	5.31088	-6.74853	5.08395e-05	0.000948722	-4.05173	stage	Time 0
		DYNLL2	-0.780577	5.78101	-7.03991	5.1025e-05	0.000949715	-4.05088	stage	Time 0
		PDZD4	2.70682	3.27782	6.12921	5.10459e-05	0.000949715	4.05079	stage	Time 0
		APBB3	-1.14249	2.04875	-6.12713	5.12071e-05	0.000951284	-4.05005	stage	Time 0
		USF1	-2.13484	4.4536	-6.68994	5.1332e-05	0.000952178	-4.04948	stage	Time 0
		ATPSCKMT	-0.973641	4.10283	-6.12291	5.15358e-05	0.000954529	-4.04855	stage	Time 0
		ZNF561	1.06041	1.40011	6.41047	5.16406e-05	0.000955042	4.04808	stage	Time 0
		HSPA4L	2.00566	1.85876	6.21539	5.1878e-05	0.000956816	4.047	stage	Time 0
		TMSB15B.1	1.57763	0.446459	6.11839	5.18909e-05	0.000956816	4.04694	stage	Time 0
		AGTPBP1	0.65095	4.44363	6.11467	5.21843e-05	0.000960795	4.04562	stage	Time 0
		UAP1L1	3.27606	0.0965183	6.11142	5.24431e-05	0.000964129	4.04446	stage	Time 0
		HSF2BP	-2.07876	2.1777	-6.50979	5.26048e-05	0.000965668	-4.04374	stage	Time 0
		BRCC3	0.888479	4.40201	6.1051	5.29487e-05	0.000970543	4.04221	stage	Time 0
		GRB7	1.18322	3.97355	6.10249	5.31592e-05	0.000972794	4.04128	stage	Time 0
		RGS14	2.07159	3.88239	6.48132	5.32285e-05	0.000972794	4.04098	stage	Time 0
		HADHA	0.657882	6.6253	6.50134	5.34704e-05	0.000975776	4.03992	stage	Time 0
		CPXM1	-1.71262	5.0188	-6.09764	5.35532e-05	0.000975849	-4.03955	stage	Time 0
		H4C11	2.86957	3.51802	6.70681	5.37994e-05	0.000978895	4.03848	stage	Time 0
		FAM86C1	1.50463	2.99049	6.67618	5.42745e-05	0.000985653	4.03641	stage	Time 0
		TTC7A	-0.649258	2.5561	-6.08817	5.43298e-05	0.000985653	-4.03617	stage	Time 0
		FBXO33	0.846266	3.23007	6.47679	5.45196e-05	0.00098765	4.03536	stage	Time 0
		FAXC	0.55759	4.42999	6.49071	5.46666e-05	0.000988867	4.03472	stage	Time 0
		QSOX2	-0.89725	3.9874	-6.82935	5.49557e-05	0.000991038	-4.03349	stage	Time 0
		TENM4	-2.2081	1.6567	-6.07992	5.50166e-05	0.000991038	-4.03322	stage	Time 0
		TRPS1	1.29172	2.48613	6.32519	5.50617e-05	0.000991038	4.03303	stage	Time 0
		PIGQ	-0.733703	4.49715	-6.64523	5.51065e-05	0.000991038	-4.03284	stage	Time 0
		SLC4A8	1.28305	2.48846	6.84026	5.52787e-05	0.000992694	4.03211	stage	Time 0
		AURKAIP1	0.566221	9.41911	6.48133	5.56792e-05	0.000996792	4.03041	stage	Time 0
		GAS8	-1.06545	3.3328	-6.07201	5.5684e-05	0.000996792	-4.03039	stage	Time 0
		COG2	0.557231	4.47719	6.6108	5.57483e-05	0.000996792	4.03012	stage	Time 0
		PROCR	2.21704	3.21597	6.50939	5.58972e-05	0.000998014	4.02949	stage	Time 0
		SMPD4	0.965196	5.51462	6.06841	5.59909e-05	0.000998146	4.0291	stage	Time 0
		CRYM	1.68823	3.17066	6.36766	5.608e-05	0.000998146	4.02873	stage	Time 0
		NOL8	-0.884947	5.02158	-6.06659	5.61462e-05	0.000998146	-4.02845	stage	Time 0
		C1orf43	1.0706	7.59349	6.73487	5.6439e-05	0.0010012	4.02723	stage	Time 0
		INTS11	-0.549962	6.71151	-6.06204	5.65376e-05	0.0010012	-4.02681	stage	Time 0
		MYO1F	-1.53765	1.64001	-6.29677	5.65607e-05	0.0010012	-4.02672	stage	Time 0
		USP24	-0.878441	4.67144	-7.06744	5.71044e-05	0.0010073	-4.02447	stage	Time 0
		PPP2R2D	-0.517542	5.53267	-6.05517	5.71335e-05	0.0010073	-4.02435	stage	Time 0
		A4GALT	1.66949	2.2438	6.05499	5.7149e-05	0.0010073	4.02428	stage	Time 0
		CCDC77	0.713739	4.07508	6.64955	5.72374e-05	0.00100743	4.02392	stage	Time 0
		ABR	-1.21226	3.52575	-6.05097	5.75011e-05	0.00101063	-4.02284	stage	Time 0
		ALDH7A1	-0.874626	7.32984	-6.55323	5.7702e-05	0.00101208	-4.02202	stage	Time 0
		CCDC85B	1.21062	7.9101	6.70717	5.77468e-05	0.00101208	4.02183	stage	Time 0
		VASH2	1.48654	5.86525	6.63874	5.81046e-05	0.00101691	4.02038	stage	Time 0
		OLFML2A	-1.89874	2.46411	-6.72878	5.83338e-05	0.00101948	-4.01945	stage	Time 0
		SPTSSB	-2.72869	3.83125	-6.04038	5.84394e-05	0.00101989	-4.01903	stage	Time 0
		KCNH5	-2.6196	0.328202	-6.03698	5.87432e-05	0.00102375	-4.0178	stage	Time 0
		GSTT2B	-3.94161	4.82065	-6.64353	5.90657e-05	0.00102709	-4.01651	stage	Time 0
		ZNF846	-1.00974	3.4147	-6.03302	5.91004e-05	0.00102709	-4.01637	stage	Time 0
		RAD51D	0.942601	3.94622	6.57126	5.94327e-05	0.00103141	4.01505	stage	Time 0
		SCLT1	0.585008	3.85425	6.8117	6.02148e-05	0.00104209	4.01197	stage	Time 0
		PTEN	0.506909	5.39243	6.02081	6.02158e-05	0.00104209	4.01196	stage	Time 0
		LRRC29	-1.36402	0.411841	-6.20769	6.06046e-05	0.00104735	-4.01044	stage	Time 0
		TMEM74	-1.18334	3.19107	-6.01253	6.09845e-05	0.00105245	-4.00897	stage	Time 0
		TMEM126A	-0.840586	7.39707	-6.57652	6.11578e-05	0.00105397	-4.0083	stage	Time 0
		MSMP	1.48528	0.376984	6.00727	6.14781e-05	0.00105802	4.00706	stage	Time 0
		KARS1	-0.46948	6.82256	-6.00153	6.20215e-05	0.00106589	-4.00498	stage	Time 0
		ISG15	1.86881	5.59799	5.99908	6.22551e-05	0.00106842	4.0041	stage	Time 0
		LUZP2	2.40532	0.393498	6.46797	6.25829e-05	0.00107257	4.00285	stage	Time 0
		TSNAX	0.521049	6.04926	6.46208	6.28625e-05	0.00107587	4.0018	stage	Time 0
		BAG6	-0.348851	6.34792	-6.77811	6.2958e-05	0.00107602	-4.00144	stage	Time 0
		TRIM24	-0.719766	7.62549	-6.38395	6.34384e-05	0.00108183	-3.99964	stage	Time 0
		PGAP4	0.744496	4.60983	5.98647	6.34727e-05	0.00108183	3.99951	stage	Time 0
		ABTB2	-1.18164	3.26102	-5.98336	6.37764e-05	0.00108551	-3.99838	stage	Time 0
		ALDH1A3	3.09346	0.795473	6.07128	6.42962e-05	0.00109168	3.99646	stage	Time 0
		ADCYAP1R1	-2.19572	2.19385	-6.034	6.4315e-05	0.00109168	-3.99639	stage	Time 0
		TRRAP	-0.613617	4.86006	-6.59159	6.47058e-05	0.00109681	-3.99496	stage	Time 0
		CEP128	0.957551	2.79994	6.63783	6.48077e-05	0.00109704	3.99458	stage	Time 0
		ZFP91	-0.803387	4.48816	-5.96814	6.52869e-05	0.00110364	-3.99284	stage	Time 0
		ERCC6	1.43319	1.76322	5.9664	6.54622e-05	0.0011051	3.9922	stage	Time 0
		ACP5	3.27767	0.982336	6.56658	6.56975e-05	0.00110756	3.99135	stage	Time 0
		PPP6R3	-0.639537	5.96554	-5.96181	6.59258e-05	0.0011099	-3.99053	stage	Time 0
		SGPP2	-3.21537	0.25409	-6.32549	6.70725e-05	0.00112767	-3.98644	stage	Time 0
		PRDX3	0.801109	8.21181	6.563	6.72562e-05	0.00112923	3.98579	stage	Time 0
		GLB1L2	2.10044	0.251971	5.94739	6.74067e-05	0.00113022	3.98526	stage	Time 0
		PPIC	2.62206	4.04144	6.32119	6.7755e-05	0.00113453	3.98403	stage	Time 0
		FCSK	-1.20498	1.92598	-6.51632	6.80485e-05	0.00113791	-3.98301	stage	Time 0
		NUP93	-0.558004	5.94938	-5.93999	6.81808e-05	0.00113823	-3.98255	stage	Time 0
		CAMKK1	-0.959881	1.38694	-5.93931	6.82518e-05	0.00113823	-3.9823	stage	Time 0
		C19orf48	1.33493	7.01402	6.53937	6.89896e-05	0.00114899	3.97974	stage	Time 0
		TTN	5.18845	0.0931975	6.52416	6.90866e-05	0.00114906	3.97941	stage	Time 0
		CBWD3	-1.1162	6.98222	-6.33065	6.9272e-05	0.0011506	-3.97877	stage	Time 0
		PADI2	-2.48174	2.01019	-6.64956	6.96113e-05	0.00115248	-3.97761	stage	Time 0
		CXXC4	2.32622	0.784554	5.92616	6.96524e-05	0.00115248	3.97747	stage	Time 0
		MTFR1	-1.04522	5.10988	-6.62013	6.9664e-05	0.00115248	-3.97743	stage	Time 0
		HS3ST3A1	1.77431	1.8845	6.06048	7.00884e-05	0.00115795	3.97599	stage	Time 0
		UXS1	0.788655	5.40422	6.45572	7.04125e-05	0.00116176	3.97489	stage	Time 0
		EBAG9	0.738933	5.14087	6.53075	7.10596e-05	0.00117088	3.97271	stage	Time 0
		MCF2L2	1.44229	0.490271	5.91111	7.12919e-05	0.00117315	3.97193	stage	Time 0
		NHLRC3	1.20254	3.91242	5.90772	7.16668e-05	0.00117775	3.97068	stage	Time 0
		RBM6	0.324456	5.97454	6.18963	7.29417e-05	0.00119711	3.96648	stage	Time 0
		PHOSPHO2	-1.33957	4.53929	-6.70029	7.32125e-05	0.00119997	-3.9656	stage	Time 0
		SRP68	-0.353027	5.76068	-5.89263	7.33604e-05	0.0012008	-3.96512	stage	Time 0
		ADAMTS12	1.24448	2.53765	6.50901	7.35715e-05	0.00120267	3.96443	stage	Time 0
		CPT1C	-2.63727	5.67076	-6.9951	7.39619e-05	0.00120733	-3.96317	stage	Time 0
		HEBP2	2.65109	6.52914	6.51106	7.40516e-05	0.00120733	3.96288	stage	Time 0
		ST20	1.35966	4.58832	6.40799	7.46855e-05	0.00121397	3.96084	stage	Time 0
		HDAC3	0.651354	6.31078	5.88093	7.47038e-05	0.00121397	3.96078	stage	Time 0
		NDUFAF7	0.994529	5.07498	6.45712	7.47696e-05	0.00121397	3.96057	stage	Time 0
		MOCOS	2.91911	1.65365	6.40185	7.48503e-05	0.00121397	3.96032	stage	Time 0
		AL049629.2	1.30926	2.31174	5.87871	7.49604e-05	0.00121416	3.95997	stage	Time 0
		INTS2	-0.917856	4.10485	-5.87435	7.54697e-05	0.00122082	-3.95835	stage	Time 0
		CCDC88B	-1.30538	2.57026	-5.87303	7.56244e-05	0.00122172	-3.95786	stage	Time 0
		GPAA1	0.751616	5.62137	6.38891	7.62296e-05	0.00122822	3.95595	stage	Time 0
		BTN2A2	1.59302	1.89098	6.42691	7.62494e-05	0.00122822	3.95589	stage	Time 0
		C9orf24	-1.7057	1.72097	-5.8671	7.63242e-05	0.00122822	-3.95566	stage	Time 0
		PRDX5	0.856946	9.25132	6.4451	7.643e-05	0.00122833	3.95533	stage	Time 0
		POLR1B	-1.04145	5.67453	-5.86291	7.68228e-05	0.00123305	-3.9541	stage	Time 0
		SLC41A3	1.30431	3.48066	5.85926	7.72598e-05	0.00123683	3.95274	stage	Time 0
		USP37	-0.606474	4.45868	-7.56917	7.73331e-05	0.00123683	-3.95252	stage	Time 0
		TADA3	0.852617	6.25418	8.04672	7.73579e-05	0.00123683	3.95244	stage	Time 0
		HDHD3	0.826058	3.71621	6.30894	7.8457e-05	0.00125205	3.94907	stage	Time 0
		GSPT1	-0.426851	7.7852	-5.84891	7.85121e-05	0.00125205	-3.9489	stage	Time 0
		ZNF841	-0.930485	1.96942	-5.8458	7.88939e-05	0.0012554	-3.94774	stage	Time 0
		LTO1	0.556509	3.47048	5.84555	7.89246e-05	0.0012554	3.94764	stage	Time 0
		MPPE1	-1.28809	4.21012	-5.84463	7.90373e-05	0.00125558	-3.9473	stage	Time 0
		KRT10	1.26985	7.62931	6.39042	7.95369e-05	0.0012619	3.94579	stage	Time 0
		RNF152	1.91769	0.0653503	6.41662	7.96758e-05	0.00126248	3.94537	stage	Time 0
		FNDC3A	-0.740653	5.13953	-6.3948	7.98085e-05	0.00126297	-3.94497	stage	Time 0
		EGFL7	0.910975	6.17232	5.83194	8.06148e-05	0.00127411	3.94256	stage	Time 0
		TTC27	-0.578738	4.1335	-5.83038	8.08107e-05	0.00127557	-3.94198	stage	Time 0
		GGA3	-0.87012	4.59848	-8.70582	8.09341e-05	0.0012759	-3.94162	stage	Time 0
		TTF2	-0.842011	6.29878	-6.39728	8.12417e-05	0.00127912	-3.94071	stage	Time 0
		PHYHD1	1.99158	3.61599	6.53563	8.1635e-05	0.0012813	3.93955	stage	Time 0
		SPCS3	-0.653532	6.97476	-5.82356	8.16746e-05	0.0012813	-3.93943	stage	Time 0
		SUMO4	1.31961	1.72665	6.05595	8.16904e-05	0.0012813	3.93939	stage	Time 0
		SLFN5	3.88176	0.742748	6.07276	8.20553e-05	0.00128409	3.93832	stage	Time 0
		ARHGEF5	1.7254	3.90514	6.29012	8.22581e-05	0.00128409	3.93772	stage	Time 0
		GUF1	0.322055	4.90636	5.81889	8.22704e-05	0.00128409	3.93769	stage	Time 0
		IQCH	-1.32431	0.852217	-5.8188	8.22826e-05	0.00128409	-3.93765	stage	Time 0
		MAPK13	2.59004	2.07172	5.96415	8.26e-05	0.00128594	3.93673	stage	Time 0
		TNKS	-0.633215	5.0252	-5.81626	8.26091e-05	0.00128594	-3.9367	stage	Time 0
		FAM124B	2.29327	0.261423	5.81031	8.33792e-05	0.00129629	3.93447	stage	Time 0
		LHFPL6	3.68709	2.33743	5.86487	8.34834e-05	0.00129629	3.93417	stage	Time 0
		TMEM64	2.92544	3.61558	6.32145	8.4336e-05	0.00130519	3.93173	stage	Time 0
		ZFAND1	1.02358	5.68811	5.80185	8.44889e-05	0.00130519	3.9313	stage	Time 0
		POGLUT3	-1.02375	3.49951	-6.11562	8.45226e-05	0.00130519	-3.9312	stage	Time 0
		RAD54B	-0.640492	3.99205	-5.80152	8.45318e-05	0.00130519	-3.93117	stage	Time 0
		SPRTN	0.410932	4.21414	5.79997	8.47368e-05	0.00130519	3.93059	stage	Time 0
		PLEKHG6	-0.907097	3.63041	-5.79961	8.47852e-05	0.00130519	-3.93046	stage	Time 0
		YPEL3	0.932335	5.27567	5.79941	8.48118e-05	0.00130519	3.93038	stage	Time 0
		PCDH1	-1.11737	6.22164	-5.79808	8.49878e-05	0.00130519	-3.92988	stage	Time 0
		SCO1	0.47226	6.41578	5.79795	8.50044e-05	0.00130519	3.92983	stage	Time 0
		MTERF2	-0.627295	3.72142	-5.79581	8.52898e-05	0.00130755	-3.92903	stage	Time 0
		PDLIM2	1.2013	7.12703	6.31435	8.54294e-05	0.00130755	3.92864	stage	Time 0
		BRD3OS	-0.884278	4.61058	-5.79376	8.55639e-05	0.00130755	-3.92826	stage	Time 0
		DNAJC4	1.06441	5.00792	6.2133	8.56115e-05	0.00130755	3.92812	stage	Time 0
		OSTF1	1.50007	3.9666	6.31537	8.56856e-05	0.00130755	3.92791	stage	Time 0
		GABPA	-0.737533	4.36878	-6.0915	8.61341e-05	0.00131249	-3.92666	stage	Time 0
		ATL3	-0.864602	4.58824	-5.78886	8.62211e-05	0.00131249	-3.92642	stage	Time 0
		EVI5L	-1.61231	4.20883	-5.78733	8.64283e-05	0.00131403	-3.92584	stage	Time 0
		TP53I13	0.843443	5.13459	5.78558	8.66645e-05	0.00131601	3.92518	stage	Time 0
		METTL8	0.7615	5.50462	6.33897	8.6974e-05	0.00131865	3.92432	stage	Time 0
		ZNF578	3.19802	0.555135	5.97914	8.71097e-05	0.00131865	3.92395	stage	Time 0
		STARD3NL	0.711554	6.08079	6.58336	8.7158e-05	0.00131865	3.92381	stage	Time 0
		CHMP3	0.767753	4.41785	6.31612	8.7274e-05	0.0013188	3.92349	stage	Time 0
		SDC3	-1.00839	4.16615	-6.20675	8.74972e-05	0.00132035	-3.92288	stage	Time 0
		SHISA9	2.08234	3.82303	6.20581	8.75901e-05	0.00132035	3.92262	stage	Time 0
		USP5	-0.383477	5.55041	-5.77579	8.80028e-05	0.00132496	-3.92149	stage	Time 0
		TAF8	1.62318	3.35653	6.04498	8.83521e-05	0.00132861	3.92054	stage	Time 0
		TTC5	0.98826	4.27336	6.2953	8.84951e-05	0.00132869	3.92015	stage	Time 0
		OLFM3	-3.46343	0.189084	-5.85289	8.85725e-05	0.00132869	-3.91994	stage	Time 0
		SPRY4	-2.18666	6.21326	-6.90647	8.87035e-05	0.00132905	-3.91958	stage	Time 0
		FNTB	-0.691004	3.40498	-5.76705	8.92157e-05	0.00133511	-3.91819	stage	Time 0
		PLPP2	2.47169	5.56987	5.76542	8.94438e-05	0.00133619	3.91758	stage	Time 0
		DPY19L2	-1.24585	1.65598	-5.765	8.95034e-05	0.00133619	-3.91742	stage	Time 0
		GK	-1.37571	3.29198	-6.29567	8.98754e-05	0.00134013	-3.91642	stage	Time 0
		CHCHD10	-0.945939	8.39999	-6.33461	9.01226e-05	0.0013422	-3.91575	stage	Time 0
		RUBCNL	2.39632	0.306102	6.09423	9.0502e-05	0.00134623	3.91474	stage	Time 0
		WDR83	0.781155	4.59186	5.99975	9.06765e-05	0.00134721	3.91427	stage	Time 0
		TPGS2	0.371416	7.34373	5.75508	9.09056e-05	0.001349	3.91367	stage	Time 0
		EFCAB2	1.33557	4.36439	6.23706	9.1198e-05	0.00135172	3.91289	stage	Time 0
		SLC26A6	-0.951973	4.36933	-5.75189	9.13631e-05	0.00135255	-3.91245	stage	Time 0
		EIF2AK2	0.803573	5.87516	7.21752	9.17672e-05	0.00135673	3.91139	stage	Time 0
		ZNF836	1.66943	1.93695	5.82299	9.18649e-05	0.00135673	3.91113	stage	Time 0
		COL14A1	1.55733	1.79392	5.73442	9.3903e-05	0.00138518	3.90583	stage	Time 0
		AARD	2.15855	2.0375	6.34704	9.40303e-05	0.00138541	3.9055	stage	Time 0
		TMED7	-1.0624	5.6515	-6.2069	9.62994e-05	0.00141641	-3.89973	stage	Time 0
		CALCOCO2	0.810471	3.80864	5.71769	9.64069e-05	0.00141641	3.89946	stage	Time 0
		UQCC3	-0.695817	8.19647	-5.71723	9.64775e-05	0.00141641	-3.89928	stage	Time 0
		PSME1	1.01481	5.75253	5.70695	9.80516e-05	0.00143432	3.89536	stage	Time 0
		GMIP	-0.855252	3.2792	-6.28108	9.8147e-05	0.00143432	-3.89513	stage	Time 0
		PACRGL	0.79885	2.89926	5.70482	9.83809e-05	0.00143432	3.89455	stage	Time 0
		RIC3	1.70308	4.58019	6.15003	9.84079e-05	0.00143432	3.89448	stage	Time 0
		UBASH3B	1.31075	1.82498	6.08095	9.85068e-05	0.00143432	3.89424	stage	Time 0
		EEF2K	-1.04528	3.50596	-5.70321	9.86304e-05	0.00143432	-3.89394	stage	Time 0
		SMYD5	-0.528484	4.31477	-5.70307	9.86524e-05	0.00143432	-3.89388	stage	Time 0
		ARL4D	1.93909	3.52479	5.70259	9.8728e-05	0.00143432	3.8937	stage	Time 0
		ADAMTS13	-1.73967	1.81093	-5.702	9.88197e-05	0.00143432	-3.89347	stage	Time 0
		SERPINB6	2.16031	4.73436	6.20525	9.8938e-05	0.00143432	3.89318	stage	Time 0
		AGBL3	0.856904	1.22464	6.20566	9.9104e-05	0.00143432	3.89278	stage	Time 0
		TAC3	-2.61234	3.95268	-7.24016	9.91191e-05	0.00143432	-3.89274	stage	Time 0
		PIP5K1B	-1.54851	2.33333	-6.00188	9.92414e-05	0.00143432	-3.89244	stage	Time 0
		CRISPLD1	1.3155	2.321	5.9317	9.93179e-05	0.00143432	3.89225	stage	Time 0
		RAB34	0.69178	8.60471	5.69716	9.95761e-05	0.00143638	3.89162	stage	Time 0
		CISD3	0.679339	4.7668	5.9638	9.9774e-05	0.00143756	3.89114	stage	Time 0
		TEPP	-2.18933	0.983011	-5.81012	9.99154e-05	0.00143792	-3.8908	stage	Time 0
		WWC2	0.781907	5.72614	6.87263	0.000100032	0.00143792	3.89052	stage	Time 0
		NOP9	-1.18544	3.62472	-6.4253	0.000100964	0.00144965	-3.88826	stage	Time 0
		RIDA	-0.512468	6.84179	-6.84538	0.000101244	0.0014504	-3.88759	stage	Time 0
		CIB2	-0.365186	6.97801	-5.68659	0.00010125	0.0014504	-3.88758	stage	Time 0
		CPT1A	2.04124	0.846819	5.88021	0.000101496	0.00145188	3.88699	stage	Time 0
		SRSF12	-0.733927	4.03668	-5.68441	0.000101599	0.00145188	-3.88674	stage	Time 0
		VAT1	1.10924	6.79873	6.20751	0.000101706	0.00145188	3.88649	stage	Time 0
		NDOR1	0.933789	1.20838	5.68114	0.000102125	0.0014562	3.88549	stage	Time 0
		DNPEP	-1.01201	6.48034	-6.22609	0.000102396	0.00145837	-3.88484	stage	Time 0
		SDSL	-3.2693	3.3763	-6.64881	0.000102684	0.00146081	-3.88416	stage	Time 0
		ARHGEF17	-0.894149	2.01424	-5.67258	0.000103516	0.00147095	-3.8822	stage	Time 0
		FAM216A	-1.02242	5.53989	-5.96096	0.0001037	0.00147135	-3.88177	stage	Time 0
		ZNF789	-1.07185	3.82018	-6.12763	0.000103782	0.00147135	-3.88158	stage	Time 0
		TMEM31	-2.57382	0.615498	-5.94753	0.00010449	0.00147828	-3.87992	stage	Time 0
		SHMT1	-1.17545	5.47808	-8.42195	0.000104509	0.00147828	-3.87988	stage	Time 0
		DHDH	-1.95447	2.86885	-6.00266	0.000104793	0.00148057	-3.87922	stage	Time 0
		KANSL3	-0.592229	3.75983	-6.19281	0.00010491	0.00148057	-3.87895	stage	Time 0
		DSEL	2.92551	3.95777	6.17072	0.000105209	0.00148309	3.87825	stage	Time 0
		KCTD1	1.13888	2.92324	6.30986	0.000105735	0.00148883	3.87704	stage	Time 0
		COX7A2L	0.450578	8.51403	5.65788	0.00010595	0.00149016	3.87655	stage	Time 0
		GPALPP1	-0.562719	4.87362	-5.65257	0.000106845	0.00150103	-3.8745	stage	Time 0
		TPRA1	-0.96558	4.2816	-6.16217	0.00010735	0.00150643	-3.87335	stage	Time 0
		SERINC5	2.17069	4.74008	6.36325	0.000107599	0.00150822	3.87278	stage	Time 0
		KIF26A	-1.26852	4.53228	-5.64551	0.000108046	0.00151276	-3.87177	stage	Time 0
		LSM10	0.450848	7.24267	5.64314	0.000108451	0.00151672	3.87086	stage	Time 0
		MYO6	1.26957	4.38094	5.64156	0.000108723	0.0015188	3.87025	stage	Time 0
		FZD8	-1.93852	2.67227	-5.64086	0.000108845	0.0015188	-3.86998	stage	Time 0
		ARSG	-1.52469	2.95879	-6.45158	0.000109739	0.00152955	-3.86798	stage	Time 0
		DOCK2	-2.18173	0.778991	-5.63346	0.000110129	0.00153326	-3.86712	stage	Time 0
		BRINP1	-1.29439	4.38503	-5.6301	0.000110717	0.00153972	-3.86582	stage	Time 0
		ZMYM1	-0.460034	5.01959	-5.92267	0.000111161	0.00154271	-3.86484	stage	Time 0
		NAAA	1.76908	0.587155	6.33336	0.000111181	0.00154271	3.8648	stage	Time 0
		MAP10	1.78534	1.11235	5.62557	0.000111516	0.00154563	3.86406	stage	Time 0
		PTCD2	-0.772247	3.93574	-6.46658	0.000111772	0.00154745	-3.8635	stage	Time 0
		RNASEH2A	1.62807	2.46943	5.74982	0.000112299	0.00155266	3.86236	stage	Time 0
		SMIM13	0.838723	4.27263	6.2222	0.000112399	0.00155266	3.86214	stage	Time 0
		INSYN1	-2.26004	0.102406	-5.61926	0.000112638	0.00155347	-3.86162	stage	Time 0
		COL5A2	3.22355	2.48113	6.11676	0.000112733	0.00155347	3.86141	stage	Time 0
		RASL11A	-1.62138	2.24393	-6.14688	0.000112861	0.00155347	-3.86114	stage	Time 0
		ANKS3	0.581664	4.28862	5.91359	0.000112959	0.00155347	3.86092	stage	Time 0
		SNX17	0.578605	6.25962	6.69228	0.000113088	0.00155351	3.86065	stage	Time 0
		KIF4A	-0.638916	5.39972	-5.84697	0.000113741	0.00156075	-3.85924	stage	Time 0
		NUP133	-1.36972	5.47372	-6.11842	0.000113999	0.00156257	-3.85868	stage	Time 0
		FGGY	-1.4012	3.96787	-5.8768	0.000114528	0.00156808	-3.85755	stage	Time 0
		RNF141	-0.829823	5.71995	-6.18664	0.000114832	0.00157051	-3.85691	stage	Time 0
		SMAP2	1.20847	2.47973	5.90984	0.000115129	0.00157224	3.85627	stage	Time 0
		GNG3	-1.90353	4.54147	-5.60504	0.000115212	0.00157224	-3.8561	stage	Time 0
		TUSC3	0.707646	6.26125	6.12822	0.000115546	0.0015735	3.85539	stage	Time 0
		SPINT1	1.09368	6.15496	5.60315	0.000115558	0.0015735	3.85536	stage	Time 0
		FOXRED2	1.35784	2.38823	5.60088	0.000115976	0.00157745	3.85448	stage	Time 0
		PAN2	-0.944511	2.40118	-5.5963	0.000116825	0.00158554	-3.85269	stage	Time 0
		COA3	-0.657965	7.94849	-6.15787	0.000116826	0.00158554	-3.85269	stage	Time 0
		EPS15L1	-0.495201	4.09616	-5.5918	0.000117665	0.00159517	-3.85094	stage	Time 0
		CCDC57	-0.857622	2.38137	-5.58654	0.000118654	0.00160682	-3.84889	stage	Time 0
		GTPBP6	1.15737	6.15194	6.61701	0.000118923	0.0016087	3.84834	stage	Time 0
		GTF2IRD1	-0.473802	3.92759	-5.58263	0.000119394	0.00161332	-3.84737	stage	Time 0
		RXRB	-0.666023	3.11102	-5.58146	0.000119617	0.00161457	-3.84691	stage	Time 0
		MYPOP	1.36516	3.24877	6.05229	0.000119897	0.00161659	3.84634	stage	Time 0
		CES1	-2.97583	2.75091	-5.57619	0.000120627	0.00162466	-3.84485	stage	Time 0
		DNAJB6	0.691504	8.13151	5.56906	0.000122005	0.00164144	3.84206	stage	Time 0
		ZNF302	1.24019	2.42887	6.25599	0.000122696	0.00164727	3.84068	stage	Time 0
		EME1	-0.971005	4.06103	-5.56482	0.000122833	0.00164727	-3.8404	stage	Time 0
		PRPF8	-0.695473	6.80192	-6.07101	0.000122837	0.00164727	-3.84039	stage	Time 0
		SCG3	1.92433	4.74644	6.13167	0.000123427	0.00165339	3.83922	stage	Time 0
		UBE2J1	0.942092	4.52734	5.9781	0.000123802	0.00165662	3.83847	stage	Time 0
		ATF7	0.6783	4.44535	5.87623	0.0001244	0.00166239	3.83729	stage	Time 0
		RNF144B	2.14198	1.83332	5.97756	0.000124584	0.00166239	3.83693	stage	Time 0
		PLXNB1	-0.669396	4.8345	-6.04447	0.000124636	0.00166239	-3.83682	stage	Time 0
		LHPP	-1.77299	4.87461	-5.55177	0.000125418	0.00167102	-3.83529	stage	Time 0
		CROCC	-0.699281	4.04549	-5.55064	0.000125646	0.00167227	-3.83484	stage	Time 0
		APBB2	-0.856984	5.60214	-5.54685	0.000126408	0.0016806	-3.83335	stage	Time 0
		NFIA	-2.32107	4.21184	-5.546	0.00012658	0.00168108	-3.83302	stage	Time 0
		ACADVL	0.639887	5.39079	5.54244	0.000127303	0.00168888	3.83162	stage	Time 0
		GLCE	1.31024	3.84779	6.14639	0.000127751	0.001693	3.83076	stage	Time 0
		DPH2	1.28407	5.11263	5.53707	0.000128401	0.00169838	3.82951	stage	Time 0
		MPHOSPH8	-0.59858	6.18489	-6.57118	0.00012843	0.00169838	-3.82945	stage	Time 0
		SSR4	0.64931	8.39136	6.2668	0.000128705	0.00170019	3.82892	stage	Time 0
		EID2	0.467183	5.58967	5.53447	0.000128936	0.00170143	3.82848	stage	Time 0
		DGKK	-3.1439	1.77182	-5.53358	0.000129118	0.00170202	-3.82813	stage	Time 0
		GINS3	-1.06072	4.1911	-5.86816	0.000129567	0.00170613	-3.82728	stage	Time 0
		SEC31B	-1.4453	0.698895	-5.52929	0.000130009	0.00171012	-3.82644	stage	Time 0
		LTBR	-1.83271	2.11062	-5.64398	0.000130246	0.00171142	-3.82599	stage	Time 0
		NCBP3	-0.649927	6.14324	-5.52617	0.00013066	0.00171323	-3.82521	stage	Time 0
		REEP3	1.20711	5.70763	6.02375	0.000130777	0.00171323	3.82499	stage	Time 0
		LRPPRC	-0.459475	7.02626	-5.52551	0.000130798	0.00171323	-3.82495	stage	Time 0
		MPP3	-0.934075	1.655	-5.52415	0.000131083	0.00171516	-3.82441	stage	Time 0
		ZCCHC4	-0.876645	3.2406	-5.52326	0.000131269	0.00171577	-3.82407	stage	Time 0
		ADCK1	-0.779187	3.20735	-5.52145	0.000131651	0.00171895	-3.82335	stage	Time 0
		CCDC34	-0.508465	6.50319	-6.16573	0.000132149	0.00172212	-3.82242	stage	Time 0
		ZNF75A	1.22479	4.70433	5.97635	0.000132172	0.00172212	3.82238	stage	Time 0
		RMND5B	0.775096	5.91402	5.99539	0.000132607	0.00172598	3.82157	stage	Time 0
		RDM1	-2.24709	3.62574	-5.69064	0.000132821	0.00172695	-3.82117	stage	Time 0
		ANKRD65	2.8446	0.0928102	5.75491	0.000134542	0.00174749	3.81799	stage	Time 0
		SERP2	1.54076	2.29273	5.50509	0.000135149	0.00175291	3.81688	stage	Time 0
		ABHD11	-0.928168	5.00812	-5.98629	0.000135242	0.00175291	-3.81671	stage	Time 0
		ETNK2	1.03058	3.52326	6.15727	0.000135936	0.00176006	3.81545	stage	Time 0
		VMAC	1.43622	0.765839	5.50079	0.000136084	0.00176014	3.81518	stage	Time 0
		MAGIX	1.31388	0.35429	5.80413	0.000136337	0.00176158	3.81472	stage	Time 0
		WDR86	-1.8254	3.20697	-5.49727	0.000136855	0.00176208	-3.81378	stage	Time 0
		TGDS	-1.09055	4.8107	-6.08764	0.00013686	0.00176208	-3.81378	stage	Time 0
		WFDC2	1.95198	6.70973	6.00109	0.00013689	0.00176208	3.81372	stage	Time 0
		SYT6	-0.981497	5.50781	-5.49686	0.000136945	0.00176208	-3.81362	stage	Time 0
		UBR7	-0.820082	4.8083	-6.08804	0.000137762	0.00177075	-3.81215	stage	Time 0
		ZBED3	2.08447	3.49321	5.7534	0.000137939	0.0017712	3.81183	stage	Time 0
		EMD	0.878774	6.41713	5.48763	0.000138988	0.00178282	3.80996	stage	Time 0
		HAUS8	-0.712308	4.90136	-5.48346	0.000139923	0.00179296	-3.8083	stage	Time 0
		FOSL1	3.43827	2.90784	5.6957	0.000140075	0.00179305	3.80804	stage	Time 0
		TRUB1	-0.766418	4.40492	-5.79746	0.000141085	0.00180411	-3.80626	stage	Time 0
		PMVK	1.05076	6.0938	5.956	0.000141305	0.00180506	3.80587	stage	Time 0
		SLC22A5	1.42156	0.105101	5.90315	0.000143303	0.00182796	3.8024	stage	Time 0
		GON7	-0.82372	5.56771	-5.94874	0.000143393	0.00182796	-3.80224	stage	Time 0
		APOBEC3A	2.96329	0.0284382	5.81547	0.000143668	0.00182817	3.80177	stage	Time 0
		HDAC6	-0.656634	3.79513	-5.85609	0.000143704	0.00182817	-3.8017	stage	Time 0
		SUGCT	1.56455	1.51964	5.46386	0.000144405	0.0018352	3.8005	stage	Time 0
		RAD51	-0.941498	5.64516	-6.21485	0.000144921	0.00183988	-3.79961	stage	Time 0
		BRF1	-0.794606	3.97655	-6.21414	0.000145193	0.00184144	-3.79915	stage	Time 0
		XKR7	-2.76253	0.329478	-5.45977	0.000145359	0.00184166	-3.79887	stage	Time 0
		RNF38	-0.941988	4.801	-5.92457	0.000145726	0.00184443	-3.79824	stage	Time 0
		STRIP1	-0.558871	3.85125	-5.65827	0.000145923	0.00184503	-3.79791	stage	Time 0
		NOS3	1.76999	0.196157	5.96716	0.000146125	0.00184571	3.79756	stage	Time 0
		GPATCH2L	-0.552145	5.54337	-6.48217	0.000147562	0.00186196	-3.79514	stage	Time 0
		ZNF799	1.04358	1.86212	5.94352	0.00014816	0.0018656	3.79413	stage	Time 0
		PANX1	1.08661	2.99614	5.72587	0.000148258	0.0018656	3.79397	stage	Time 0
		PIGS	0.55	4.20148	5.44728	0.000148312	0.0018656	3.79388	stage	Time 0
		INSL3	-1.8238	1.50032	-5.4466	0.000148476	0.0018656	-3.7936	stage	Time 0
		SLC31A1	-0.856645	5.99716	-6.0736	0.000148604	0.0018656	-3.79339	stage	Time 0
		N4BP2	-0.595854	6.08408	-6.004	0.000149162	0.00187071	-3.79246	stage	Time 0
		XG	-4.21839	0.707571	-5.44507	0.000149594	0.00187408	-3.79174	stage	Time 0
		DPY30	-0.494408	8.519	-5.79159	0.000149733	0.00187408	-3.79151	stage	Time 0
		CHCHD5	0.689049	6.53199	5.77237	0.000151378	0.00189276	3.7888	stage	Time 0
		SOD2	0.465979	4.53192	5.93779	0.000152291	0.00189837	3.7873	stage	Time 0
		IL4R	-1.1727	4.21967	-5.43078	0.000152313	0.00189837	-3.78727	stage	Time 0
		SHD	-1.89238	2.05601	-5.43071	0.000152331	0.00189837	-3.78724	stage	Time 0
		TCTN1	-1.05098	3.6589	-5.90858	0.00015244	0.00189837	-3.78706	stage	Time 0
		AP5B1	0.606794	3.04571	5.42801	0.000152996	0.00190339	3.78615	stage	Time 0
		PLOD1	1.21181	3.40013	5.42683	0.000153288	0.00190511	3.78568	stage	Time 0
		CCDC173	-2.00078	0.94504	-5.59424	0.000154394	0.00191693	-3.78389	stage	Time 0
		CEP76	0.514575	3.07049	5.82299	0.000154966	0.0019221	3.78297	stage	Time 0
		ZNF883	1.68171	3.5431	5.97096	0.000155417	0.00192577	3.78225	stage	Time 0
		TMED5	0.739148	5.02762	5.87754	0.000156088	0.00193216	3.78118	stage	Time 0
		CABLES2	-0.903029	3.00222	-5.41448	0.000156379	0.00193382	-3.78072	stage	Time 0
		PPP2R3B	-1.66798	5.4031	-5.9114	0.00015706	0.00193849	-3.77963	stage	Time 0
		SYCE3	-2.93728	0.344385	-5.71442	0.000157069	0.00193849	-3.77962	stage	Time 0
		GLYR1	-0.56688	6.07487	-5.982	0.000158192	0.00195041	-3.77784	stage	Time 0
		LONRF1	1.09893	4.49571	5.40583	0.00015858	0.00195287	3.77723	stage	Time 0
		ACOX2	1.73785	1.08452	5.73058	0.000158767	0.00195287	3.77694	stage	Time 0
		HLA-DRA	-2.81494	1.63856	-5.4194	0.000158865	0.00195287	-3.77679	stage	Time 0
		RAD1	0.519996	5.87827	5.39938	0.000160244	0.00196787	3.77463	stage	Time 0
		HMSD	2.53696	0.987483	5.87359	0.000160531	0.00196944	3.77419	stage	Time 0
		TNFSF12	1.48622	2.58808	5.53599	0.000161133	0.00197378	3.77325	stage	Time 0
		RAB3IP	0.780079	4.8083	5.39562	0.000161222	0.00197378	3.77311	stage	Time 0
		ALDH1L2	2.57532	0.867167	5.84111	0.000161477	0.00197378	3.77272	stage	Time 0
		NUDT4	-0.68384	6.68127	-5.95165	0.000161522	0.00197378	-3.77265	stage	Time 0
		B3GNT4	2.05941	0.10188	5.61384	0.000161849	0.00197584	3.77215	stage	Time 0
		CA5B	1.14544	1.47883	5.39165	0.000162262	0.00197893	3.77151	stage	Time 0
		DYDC2	-1.84824	3.00201	-5.87018	0.000162778	0.00198313	-3.77072	stage	Time 0
		MKNK1	1.30207	3.82652	5.78854	0.000162927	0.00198313	3.77049	stage	Time 0
		DNAAF4	1.80266	1.80318	6.41226	0.000163113	0.00198345	3.77021	stage	Time 0
		CHST13	1.65874	1.16242	6.2568	0.000163378	0.00198472	3.7698	stage	Time 0
		EXOSC6	-0.769098	6.26136	-5.8518	0.000163767	0.00198744	-3.76921	stage	Time 0
		LRRC28	0.839965	4.21208	5.84651	0.000163922	0.00198744	3.76897	stage	Time 0
		CES2	0.765997	3.48282	5.3843	0.000164206	0.00198773	3.76854	stage	Time 0
		SCN9A	2.43995	1.24516	5.46951	0.000164267	0.00198773	3.76845	stage	Time 0
		PSAP	-0.3234	6.86834	-5.38252	0.00016468	0.00199071	-3.76782	stage	Time 0
		UBE2M	0.548761	8.38134	5.93452	0.000164835	0.00199071	3.76758	stage	Time 0
		TBCK	-1.24304	3.56792	-6.10533	0.000165266	0.00199336	-3.76693	stage	Time 0
		LAD1	1.16266	4.03836	5.37992	0.000165376	0.00199336	3.76677	stage	Time 0
		NRIP3	1.6285	3.06855	5.70017	0.000166514	0.00200512	3.76505	stage	Time 0
		PPP5D1	-1.54587	1.37039	-5.37377	0.000167034	0.00200944	-3.76427	stage	Time 0
		ATPAF2	0.75849	4.22143	6.04933	0.000167289	0.00201056	3.76389	stage	Time 0
		SIAH2	1.77448	4.40045	5.80953	0.000168025	0.00201617	3.76279	stage	Time 0
		IER3	2.0854	6.53921	5.6281	0.000168082	0.00201617	3.76271	stage	Time 0
		TM7SF3	1.57927	0.240868	5.55209	0.000168351	0.00201744	3.76231	stage	Time 0
		SRC	0.691179	3.0228	5.87521	0.000168584	0.00201829	3.76196	stage	Time 0
		PRDM2	0.466534	4.26148	5.86799	0.000170492	0.00203615	3.75915	stage	Time 0
		ZHX1-C8orf76	0.995033	0.865386	5.36114	0.000170493	0.00203615	3.75915	stage	Time 0
		ECHDC2	1.7241	2.32409	5.44972	0.000170569	0.00203615	3.75904	stage	Time 0
		MYMX	-1.8603	2.54634	-5.35753	0.000171496	0.00204524	-3.75768	stage	Time 0
		COL11A1	1.95984	3.44247	5.60096	0.000171956	0.00204876	3.75701	stage	Time 0
		GPR37	3.14588	1.41716	5.45413	0.000173103	0.00205843	3.75534	stage	Time 0
		ENTPD6	1.12863	3.7116	5.591	0.000173187	0.00205843	3.75522	stage	Time 0
		MIEF1	0.79879	4.70889	5.87329	0.000173266	0.00205843	3.75511	stage	Time 0
		STX12	0.81379	3.34364	5.77952	0.000173786	0.00206133	3.75436	stage	Time 0
		GSTZ1	1.18213	5.65598	5.70861	0.000173843	0.00206133	3.75428	stage	Time 0
		LYPD3	2.78087	0.995688	5.39437	0.000174253	0.00206421	3.75369	stage	Time 0
		CCDC80	2.62345	2.16913	5.77318	0.000174691	0.00206743	3.75306	stage	Time 0
		ELP1	-1.02877	4.58486	-5.91628	0.000175657	0.00207688	-3.75167	stage	Time 0
		TTC13	-1.02594	2.35592	-5.72929	0.000176475	0.00208456	-3.75051	stage	Time 0
		AATK	-1.2298	1.89779	-5.33888	0.000176777	0.00208614	-3.75008	stage	Time 0
		BRICD5	-0.809087	1.53217	-5.64478	0.000177344	0.00209083	-3.74928	stage	Time 0
		ZNF100	3.60703	0.214204	5.75844	0.000177941	0.00209588	3.74844	stage	Time 0
		POLDIP3	-0.688132	5.71167	-5.33285	0.000178521	0.00210071	-3.74762	stage	Time 0
		ATG3	0.741085	6.13559	5.33214	0.000178727	0.00210115	3.74733	stage	Time 0
		COL6A1	2.57235	4.29432	5.4812	0.000179391	0.00210695	3.7464	stage	Time 0
		ENPEP	-2.72139	0.450467	-5.32538	0.000180704	0.00212036	-3.74457	stage	Time 0
		MITD1	0.910656	5.31526	5.32421	0.000181051	0.00212243	3.74409	stage	Time 0
		BCKDHB	-1.11998	5.1956	-5.3208	0.000182058	0.00213222	-3.74269	stage	Time 0
		RFTN1	1.74285	0.611272	5.49605	0.000183284	0.00214379	3.74101	stage	Time 0
		ANKAR	1.88763	0.214432	5.31632	0.000183392	0.00214379	3.74086	stage	Time 0
		MXRA8	1.30222	1.60041	5.31431	0.000183997	0.00214882	3.74003	stage	Time 0
		KBTBD6	-0.552899	4.04263	-5.75665	0.000184504	0.00215165	-3.73934	stage	Time 0
		LAMC3	-1.17938	3.01052	-5.31234	0.000184586	0.00215165	-3.73923	stage	Time 0
		INCA1	0.889268	0.139923	5.31044	0.00018516	0.00215438	3.73845	stage	Time 0
		TUBD1	-0.519504	4.8101	-5.30998	0.000185299	0.00215438	-3.73826	stage	Time 0
		MYBL2	0.807251	7.13774	5.89729	0.000185342	0.00215438	3.7382	stage	Time 0
		FBXO38	-0.640379	3.82307	-5.72891	0.000185919	0.00215907	-3.73742	stage	Time 0
		ZSCAN1	-2.17891	2.71321	-5.88283	0.00018693	0.00216878	-3.73605	stage	Time 0
		EFTUD2	-0.569895	5.84968	-5.30319	0.000187364	0.00217178	-3.73547	stage	Time 0
		SNIP1	-0.46078	3.47569	-5.30224	0.000187656	0.00217182	-3.73508	stage	Time 0
		TMEM241	1.00463	1.73387	5.30202	0.000187721	0.00217182	3.73499	stage	Time 0
		SPC24	-0.876201	4.73303	-5.30123	0.000187966	0.00217182	-3.73466	stage	Time 0
		DGLUCY	-1.04799	4.00003	-5.94706	0.000188069	0.00217182	-3.73453	stage	Time 0
		ITPR2	1.26561	4.31514	5.74481	0.000188527	0.00217508	3.73391	stage	Time 0
		C2orf88	1.3798	0.326929	5.29825	0.000188881	0.00217661	3.73344	stage	Time 0
		UGT3A2	0.727227	3.64463	5.29783	0.000189011	0.00217661	3.73327	stage	Time 0
		CHPT1	0.922742	5.85414	5.75396	0.000190074	0.00218682	3.73186	stage	Time 0
		IFT52	0.477772	5.15655	5.7199	0.000190958	0.00219496	3.73069	stage	Time 0
		YIPF2	0.795389	5.32714	5.95138	0.000194003	0.00222788	3.7267	stage	Time 0
		KRAS	0.415413	7.20625	5.28122	0.000194212	0.00222822	3.72643	stage	Time 0
		AL445524.2	2.53104	1.45846	5.64547	0.000194624	0.00222999	3.72589	stage	Time 0
		FAH	-1.03762	4.82099	-5.69625	0.000194726	0.00222999	-3.72576	stage	Time 0
		HAUS7	1.24535	2.97297	5.27842	0.000195101	0.00223132	3.72528	stage	Time 0
		TRNP1	1.17064	5.44574	5.84311	0.000195435	0.00223132	3.72485	stage	Time 0
		WWOX	0.879888	3.08528	5.69948	0.000195474	0.00223132	3.72479	stage	Time 0
		GRIA1	-2.62821	1.22338	-6.006	0.000195563	0.00223132	-3.72468	stage	Time 0
		CHAC1	3.04132	3.80444	5.58905	0.000196134	0.00223578	3.72394	stage	Time 0
		HSPB11	1.32568	6.01226	5.76219	0.000196351	0.00223621	3.72366	stage	Time 0
		TMEM216	-0.693192	5.60462	-6.11366	0.000197028	0.00224185	-3.7228	stage	Time 0
		PRSS16	0.959143	3.78011	5.57666	0.000197585	0.00224612	3.72208	stage	Time 0
		CTC1	-0.884582	2.76738	-5.26944	0.000197992	0.00224868	-3.72157	stage	Time 0
		GSDME	1.49508	1.72196	5.68701	0.000198979	0.00225782	3.72031	stage	Time 0
		ALG1L	3.22574	0.0373565	5.47106	0.000199265	0.00225901	3.71995	stage	Time 0
		TKFC	-1.16914	4.60297	-5.75414	0.000199514	0.00225975	-3.71963	stage	Time 0
		PIK3R4	-0.803644	3.92064	-5.9584	0.000199911	0.00226219	-3.71913	stage	Time 0
		TPCN1	-0.981661	3.12199	-5.7181	0.000201165	0.00227431	-3.71755	stage	Time 0
		GRHPR	0.905737	6.44385	5.54021	0.000201449	0.00227492	3.71719	stage	Time 0
		IFNGR2	-0.567552	5.74346	-5.25813	0.000201694	0.00227492	-3.71689	stage	Time 0
		ZNF879	-1.03626	1.69415	-5.78657	0.00020177	0.00227492	-3.71679	stage	Time 0
		ETAA1	-1.00246	4.72697	-6.02619	0.000203472	0.00229133	-3.71467	stage	Time 0
		TMEM121B	-0.393677	1.79882	-5.2524	0.000203596	0.00229133	-3.71451	stage	Time 0
		FAM193B	-0.541897	4.2898	-5.55343	0.000205361	0.00230896	-3.71233	stage	Time 0
		PDLIM1	2.23458	0.293287	5.48326	0.000205535	0.00230896	3.71211	stage	Time 0
		LYSMD2	1.13399	2.87636	5.51734	0.000206306	0.00231553	3.71117	stage	Time 0
		NRXN2	-2.11836	2.20558	-5.24207	0.000207073	0.00232203	-3.71023	stage	Time 0
		TMEM209	-0.838909	4.36449	-5.64592	0.000207781	0.00232786	-3.70936	stage	Time 0
		MARCHF7	-0.538675	6.32288	-5.66795	0.000208114	0.00232949	-3.70896	stage	Time 0
		ANKRD54	0.814592	3.69552	5.40718	0.000208688	0.0023338	3.70826	stage	Time 0
		TMEM255B	1.87082	1.25461	5.43381	0.000209362	0.00233923	3.70744	stage	Time 0
		DMXL1	1.00259	3.85691	6.12263	0.00020979	0.0023419	3.70693	stage	Time 0
		NIPSNAP2	-0.827142	6.28866	-5.23292	0.000210207	0.00234444	-3.70642	stage	Time 0
		PPP2R3A	-0.806389	4.11766	-5.2319	0.000210561	0.00234628	-3.706	stage	Time 0
		JRK	-1.01089	4.30947	-5.84091	0.000211649	0.00235628	-3.70469	stage	Time 0
		OVOL2	1.48064	3.30844	5.38247	0.000212174	0.00235994	3.70406	stage	Time 0
		AP1S3	1.1439	2.46929	5.91542	0.000212359	0.00235994	3.70384	stage	Time 0
		PPP5C	-0.554676	6.07004	-5.22538	0.000212826	0.00236301	-3.70328	stage	Time 0
		LIN7C	-0.756014	5.42463	-5.62148	0.000213785	0.00237154	-3.70214	stage	Time 0
		MAP2K2	0.537407	8.25824	5.77005	0.000215008	0.00238298	3.7007	stage	Time 0
		FBXO22	0.784521	6.62551	5.21856	0.000215227	0.00238327	3.70044	stage	Time 0
		YIPF6	0.592647	6.10599	5.66732	0.000216399	0.00239022	3.69906	stage	Time 0
		NUP42	0.808337	5.51872	5.64428	0.000216482	0.00239022	3.69896	stage	Time 0
		BLOC1S4	0.605852	6.40642	5.75635	0.000216624	0.00239022	3.6988	stage	Time 0
		SOD2.1	-3.08719	1.52616	-5.44389	0.000216626	0.00239022	-3.69879	stage	Time 0
		RASD2	-2.71053	1.03029	-5.21374	0.00021694	0.00239155	-3.69843	stage	Time 0
		ECI1	1.50414	6.83566	5.63453	0.000217592	0.00239637	3.69766	stage	Time 0
		RAB11FIP3	-0.933598	3.75847	-5.63525	0.000217764	0.00239637	-3.69746	stage	Time 0
		CCDC130	0.796805	3.85084	5.60705	0.000218061	0.0023965	3.69712	stage	Time 0
		CEBPZOS	1.80628	5.44734	5.40582	0.000218313	0.0023965	3.69682	stage	Time 0
		CKAP2	-0.617417	6.16253	-5.69683	0.000218355	0.0023965	-3.69678	stage	Time 0
		TUBGCP5	-0.76025	3.97418	-5.20853	0.000218806	0.00239859	-3.69625	stage	Time 0
		CA11	-1.68932	5.35983	-5.20818	0.000218933	0.00239859	-3.6961	stage	Time 0
		TNPO2	-0.657752	5.22749	-5.60293	0.000219132	0.00239864	-3.69587	stage	Time 0
		ZNF554	1.18319	0.744762	5.20237	0.000221035	0.00241734	3.69368	stage	Time 0
		BOLA1	-1.51395	5.01641	-5.20125	0.000221444	0.00241887	-3.69321	stage	Time 0
		AGPAT5	0.685801	6.3104	5.67392	0.000221565	0.00241887	3.69307	stage	Time 0
		ACY1	-1.38762	0.223907	-5.52969	0.000222836	0.0024306	-3.69161	stage	Time 0
		ACOX1	-0.493189	3.9351	-5.61067	0.000223753	0.00243846	-3.69057	stage	Time 0
		KDM8	-1.07506	1.83382	-5.6668	0.000224585	0.00244537	-3.68962	stage	Time 0
		NEIL1	-0.997725	2.61327	-5.53018	0.000224817	0.00244575	-3.68936	stage	Time 0
		MED24	-0.479987	5.15155	-5.65389	0.0002259	0.00245538	-3.68814	stage	Time 0
		UCP2	2.44532	4.77008	6.86503	0.000226787	0.00246285	3.68714	stage	Time 0
		HECW1	1.65318	1.11415	5.18586	0.000227129	0.00246441	3.68676	stage	Time 0
		TCF24	1.75701	0.0872312	5.53929	0.000227535	0.00246666	3.6863	stage	Time 0
		ZNF587B	-0.83047	4.2003	-6.62517	0.000228206	0.00247056	-3.68555	stage	Time 0
		LCK	-1.63793	5.38141	-5.18276	0.000228294	0.00247056	-3.68546	stage	Time 0
		SRBD1	-0.519343	4.88385	-5.68649	0.000228671	0.00247157	-3.68503	stage	Time 0
		RAMP2	-1.70258	6.03346	-5.69736	0.000228787	0.00247157	-3.68491	stage	Time 0
		TTL	1.21316	4.29224	6.664	0.000231358	0.00249717	3.68206	stage	Time 0
		ORAI2	0.728605	4.46608	5.17415	0.000231562	0.0024972	3.68183	stage	Time 0
		LPIN3	1.13875	1.18265	5.16838	0.000233776	0.00251888	3.67941	stage	Time 0
		PYCARD	-1.10594	7.32875	-5.66993	0.000234112	0.00252032	-3.67904	stage	Time 0
		AKIRIN1	0.878493	8.2098	5.57058	0.000234358	0.00252077	3.67877	stage	Time 0
		KCNK1	1.32915	4.29872	5.72724	0.000235878	0.00253492	3.67712	stage	Time 0
		ZNF853	-0.868073	3.12517	-5.59263	0.000236527	0.00253969	-3.67642	stage	Time 0
		KIAA0513	-0.843763	1.27788	-5.1585	0.000237624	0.00254713	-3.67524	stage	Time 0
		INO80C	0.61312	5.58175	5.70761	0.000237637	0.00254713	3.67523	stage	Time 0
		ATAD3B	1.27664	5.78152	5.15796	0.000237836	0.00254713	3.67501	stage	Time 0
		SCYL1	-0.35307	5.48433	-5.15623	0.000238516	0.0025522	-3.67429	stage	Time 0
		PROK2	2.11622	0.234801	5.54737	0.000239806	0.00256228	3.67291	stage	Time 0
		POP7	0.590052	8.20338	5.1528	0.000239872	0.00256228	3.67284	stage	Time 0
		CEP55	0.352604	4.54553	5.15216	0.000240125	0.00256278	3.67257	stage	Time 0
		ZNF354C	-0.866621	2.72884	-5.78293	0.000240607	0.00256571	-3.67206	stage	Time 0
		PTPRJ	-1.0901	3.80079	-5.60638	0.000241722	0.00257539	-3.67087	stage	Time 0
		SLC9A1	-0.754056	3.88434	-5.51352	0.000242943	0.00258554	-3.66959	stage	Time 0
		FAHD2A	1.11777	4.52856	5.5361	0.000243148	0.00258554	3.66937	stage	Time 0
		KCTD10	-0.799494	4.71905	-5.14422	0.0002433	0.00258554	-3.66921	stage	Time 0
		LGALS3	3.45184	3.75621	5.44253	0.0002455	0.00260668	3.66691	stage	Time 0
		ACADS	-1.09619	3.03699	-5.13744	0.000246047	0.00261025	-3.66634	stage	Time 0
		ARSJ	2.31882	0.950927	5.13597	0.000246645	0.00261436	3.66572	stage	Time 0
		AUTS2	-0.69594	6.38474	-5.13421	0.000247364	0.00261841	-3.66497	stage	Time 0
		ATP13A2	-0.612735	5.76261	-5.134	0.000247451	0.00261841	-3.66488	stage	Time 0
		OAZ2	-0.89925	8.21303	-5.77275	0.000247734	0.00261918	-3.66459	stage	Time 0
		PAK5	-1.76159	0.542807	-5.86082	0.000248688	0.00262702	-3.66361	stage	Time 0
		ZNF714	2.98724	1.17602	5.30105	0.000250069	0.00263935	3.66219	stage	Time 0
		FBXO17	-1.20831	4.84279	-5.54603	0.000250489	0.00264154	-3.66176	stage	Time 0
		SBF1	-0.659872	4.44175	-5.56369	0.00025215	0.00265679	-3.66007	stage	Time 0
		NAALADL1	-2.74222	1.2153	-5.12087	0.000252891	0.00266133	-3.65931	stage	Time 0
		FAM217B	0.963672	4.7211	5.51597	0.000253117	0.00266133	3.65909	stage	Time 0
		ARMC7	1.22804	3.01514	5.66503	0.000253225	0.00266133	3.65898	stage	Time 0
		ABCC5	-0.545624	4.78554	-5.56471	0.000254475	0.0026722	-3.65771	stage	Time 0
		BTBD10	1.1028	4.35602	5.48506	0.000254948	0.00267491	3.65724	stage	Time 0
		RDH11	0.4879	7.0073	5.11496	0.000255384	0.00267721	3.6568	stage	Time 0
		MED22	-0.628313	5.44782	-5.11393	0.00025582	0.00267951	-3.65636	stage	Time 0
		HK1	0.883698	6.11345	5.59805	0.000256085	0.00268003	3.6561	stage	Time 0
		SERPINF2	-1.20443	1.76933	-5.11241	0.000256464	0.00268172	-3.65572	stage	Time 0
		PLAAT3	3.03663	7.34491	5.55178	0.000256883	0.00268338	3.6553	stage	Time 0
		LRCH2	-0.903277	2.41929	-5.11103	0.000257055	0.00268338	-3.65513	stage	Time 0
		IRF1	0.828332	2.04958	5.41976	0.000258833	0.00269519	3.65336	stage	Time 0
		RANBP10	-1.05687	3.37302	-5.40242	0.000258946	0.00269519	-3.65325	stage	Time 0
		ZNF404	2.01821	2.6198	5.10647	0.000259006	0.00269519	3.65319	stage	Time 0
		DUSP14	0.951167	5.55107	6.48769	0.000259056	0.00269519	3.65314	stage	Time 0
		COG8	-0.4446	4.31895	-5.10532	0.000259502	0.00269756	-3.65269	stage	Time 0
		ESYT3	1.96345	0.512091	5.65956	0.000260402	0.00270464	3.65181	stage	Time 0
		MRPS33	-0.641861	7.88469	-5.51236	0.000260696	0.00270543	-3.65152	stage	Time 0
		BTD	1.04021	3.73055	5.37609	0.000261307	0.0027095	3.65092	stage	Time 0
		TBC1D12	1.23414	1.33454	5.53066	0.000262331	0.00271785	3.64991	stage	Time 0
		RNF217	1.21775	2.04612	5.67397	0.000263155	0.00272411	3.64911	stage	Time 0
		METTL23	-0.808147	7.0547	-5.54919	0.000263489	0.00272529	-3.64878	stage	Time 0
		WDR75	-0.416737	5.81679	-5.09455	0.000264186	0.00272826	-3.6481	stage	Time 0
		DYRK3	-1.77459	3.23847	-5.09388	0.000264476	0.00272826	-3.64782	stage	Time 0
		ZNF426	0.525891	4.87944	5.49829	0.000264595	0.00272826	3.6477	stage	Time 0
		KMT5C	0.518015	3.62282	5.09327	0.000264747	0.00272826	3.64756	stage	Time 0
		MED25	-0.734181	5.45548	-5.55646	0.000264878	0.00272826	-3.64743	stage	Time 0
		ADRA2B	-1.36738	0.576639	-5.50026	0.00026559	0.00273333	-3.64674	stage	Time 0
		CDC25A	-0.768706	5.79746	-5.09006	0.000266162	0.00273694	-3.64619	stage	Time 0
		PRKRA	-0.444074	6.84009	-5.51789	0.000267366	0.00274704	-3.64502	stage	Time 0
		ZW10	-0.549983	4.46281	-5.08523	0.00026831	0.00275445	-3.64412	stage	Time 0
		ARAF	-0.541337	4.23221	-5.43494	0.000269145	0.00276074	-3.64332	stage	Time 0
		ANKRD16	0.809233	3.99412	5.44792	0.000269586	0.00276298	3.6429	stage	Time 0
		RAB3B	0.883754	5.78025	6.18922	0.000270357	0.00276858	3.64216	stage	Time 0
		MIGA1	1.0736	2.66831	5.42074	0.000271103	0.00277393	3.64145	stage	Time 0
		GNMT	-2.01899	1.16644	-5.13837	0.000271492	0.00277548	-3.64108	stage	Time 0
		GPHN	-0.914717	3.30087	-5.07767	0.000271702	0.00277548	-3.64089	stage	Time 0
		METTL4	0.885949	3.37673	5.74383	0.000272006	0.0027763	3.6406	stage	Time 0
		PTDSS1	-0.820779	5.40675	-5.06997	0.000275205	0.00280664	-3.63759	stage	Time 0
		CYB561	1.59124	3.45477	5.41853	0.000275589	0.00280825	3.63723	stage	Time 0
		LRTOMT	-0.934922	2.81174	-5.44062	0.000275844	0.00280853	-3.63699	stage	Time 0
		EGFR	1.88995	1.38425	5.45795	0.000276932	0.00281729	3.63597	stage	Time 0
		SRP14	-0.373629	10.8977	-5.4708	0.0002776	0.00282177	-3.63535	stage	Time 0
		UBR5	-0.843729	6.70409	-5.99238	0.000278065	0.00282419	-3.63492	stage	Time 0
		SORBS3	1.28994	5.03347	5.5169	0.000278436	0.00282563	3.63458	stage	Time 0
		TSR1	-0.910779	7.5753	-5.06002	0.000279805	0.0028363	-3.63331	stage	Time 0
		GIPC1	0.687957	6.15511	5.48861	0.000279944	0.0028363	3.63318	stage	Time 0
		MFN2	-0.796429	4.91779	-5.39149	0.000280579	0.00283859	-3.6326	stage	Time 0
		ENTPD4	-0.384987	4.44507	-5.3524	0.000280629	0.00283859	-3.63255	stage	Time 0
		LRRC9	-1.39347	0.467109	-5.25914	0.000281469	0.00284477	-3.63178	stage	Time 0
		PIM3	1.26603	5.4163	5.44883	0.000282043	0.00284824	3.63126	stage	Time 0
		SLC26A11	0.389207	3.63656	5.05298	0.000283108	0.0028509	3.63029	stage	Time 0
		CTSC	1.12262	7.83475	5.47053	0.00028312	0.0028509	3.63027	stage	Time 0
		TMED7-TICAM2	1.75475	0.0177789	5.28688	0.000283132	0.0028509	3.63026	stage	Time 0
		TMED4	-0.522519	6.3971	-5.05248	0.000283344	0.0028509	-3.63007	stage	Time 0
		MTERF1	0.545453	3.68504	5.43004	0.000283456	0.0028509	3.62997	stage	Time 0
		APEX2	0.484078	4.69712	5.05084	0.000284118	0.00285377	3.62937	stage	Time 0
		CARF	-1.35652	2.38261	-5.05067	0.000284203	0.00285377	-3.62929	stage	Time 0
		GALNT7	1.13255	5.70484	5.42408	0.000285475	0.00286423	3.62814	stage	Time 0
		AHCYL1	0.596135	6.5772	5.04418	0.000287293	0.00288014	3.6265	stage	Time 0
		ACSF2	-1.18134	2.38285	-6.00925	0.000287884	0.00288373	-3.62597	stage	Time 0
		OSBPL8	0.412366	6.20176	5.04232	0.000288188	0.00288444	3.62569	stage	Time 0
		RBCK1	0.939978	5.79092	5.44152	0.00028881	0.00288833	3.62514	stage	Time 0
		C12orf43	0.608874	5.22769	5.04006	0.000289274	0.00289064	3.62472	stage	Time 0
		KRI1	-0.793411	5.22846	-5.03798	0.000290281	0.00289836	-3.62382	stage	Time 0
		DHX58	-1.19451	2.21192	-5.46132	0.000293825	0.00293139	-3.62068	stage	Time 0
		MAFA	2.05454	0.64083	5.40549	0.000295448	0.00294328	3.61926	stage	Time 0
		PALLD	1.44624	4.8844	5.28265	0.000295492	0.00294328	3.61922	stage	Time 0
		CRY2	-0.507779	2.47508	-5.24974	0.000297175	0.00295766	-3.61775	stage	Time 0
		MARCHF3	2.14422	3.4171	5.41253	0.000298617	0.00296551	3.6165	stage	Time 0
		GAN	0.671898	2.41043	5.02101	0.000298628	0.00296551	3.61649	stage	Time 0
		COLGALT2	1.81414	0.366095	5.18099	0.000298681	0.00296551	3.61644	stage	Time 0
		VWA5A	-1.34452	3.97508	-5.51223	0.000299202	0.0029683	-3.61599	stage	Time 0
		TRIM41	-0.740837	3.57151	-5.44703	0.000303924	0.00301197	-3.61193	stage	Time 0
		CKAP2L	-0.672786	4.06671	-5.2043	0.00030409	0.00301197	-3.61179	stage	Time 0
		SCN8A	-1.16884	4.07927	-5.00967	0.000304347	0.00301211	-3.61157	stage	Time 0
		ZMYM6	-0.579119	2.78102	-5.0071	0.000305658	0.00302267	-3.61046	stage	Time 0
		NEDD9	2.42482	1.61346	5.15088	0.000306102	0.00302465	3.61008	stage	Time 0
		MAD2L1BP	0.734765	4.643	5.57742	0.00030874	0.00304829	3.60785	stage	Time 0
		NSMCE1	-1.51845	5.87909	-5.38385	0.000310314	0.00306138	-3.60653	stage	Time 0
		ZSCAN30	1.01791	2.30719	5.20795	0.000310958	0.00306393	3.606	stage	Time 0
		ZNF280B	-0.652825	3.77543	-5.35511	0.000311168	0.00306393	-3.60582	stage	Time 0
		VLDLR	2.32492	3.52308	5.23527	0.000311314	0.00306393	3.6057	stage	Time 0
		OSBPL3	1.04906	1.79197	5.31422	0.00031285	0.0030766	3.60442	stage	Time 0
		FICD	0.510379	2.85502	5.16424	0.000313307	0.00307866	3.60404	stage	Time 0
		GATD1	-0.894248	4.93425	-4.99133	0.000313838	0.00308144	-3.6036	stage	Time 0
		PSMB10	-1.00849	5.20027	-4.98954	0.00031478	0.00308823	-3.60282	stage	Time 0
		ANKS6	1.17566	5.37371	5.37467	0.000315149	0.00308941	3.60252	stage	Time 0
		KHK	1.12729	4.36749	5.38965	0.000316286	0.0030981	3.60158	stage	Time 0
		NTF4	-1.53894	1.97578	-4.98617	0.000316563	0.00309837	-3.60135	stage	Time 0
		SFT2D2	1.12567	3.76187	5.35382	0.000316893	0.00309914	3.60108	stage	Time 0
		SDK1	-0.697448	1.97581	-4.98421	0.000317604	0.00310365	-3.6005	stage	Time 0
		C11orf68	-0.7702	4.98416	-4.97891	0.000320439	0.00312457	-3.59819	stage	Time 0
		CHERP	-0.495332	5.6531	-5.21155	0.000320725	0.00312457	-3.59796	stage	Time 0
		ZDHHC20	-1.0281	4.8967	-5.36278	0.000320735	0.00312457	-3.59795	stage	Time 0
		QPRT	-1.00842	7.91883	-5.31528	0.000320754	0.00312457	-3.59794	stage	Time 0
		CFAP410	-1.04695	5.17387	-4.97422	0.000322968	0.00314367	-3.59614	stage	Time 0
		MFSD4B	-0.738231	4.13223	-4.97234	0.000323991	0.00315116	-3.59532	stage	Time 0
		PARN	0.863685	4.55842	5.42915	0.000325205	0.00315792	3.59435	stage	Time 0
		CTIF	1.00209	1.92629	5.34355	0.00032555	0.00315792	3.59407	stage	Time 0
		MZT1	0.729714	6.90638	4.96937	0.00032561	0.00315792	3.59402	stage	Time 0
		ZNF230	0.849556	1.8143	4.9692	0.000325706	0.00315792	3.59395	stage	Time 0
		NPFFR2	3.87018	0.733524	5.49638	0.000326331	0.00316151	3.59345	stage	Time 0
		CYTL1	-2.88897	3.31952	-5.38956	0.000327427	0.00316965	-3.59257	stage	Time 0
		DCTN1	0.667794	5.30775	5.18787	0.000328421	0.00317679	3.59178	stage	Time 0
		SLC25A20	1.32221	0.747716	5.27576	0.000329084	0.00317721	3.59126	stage	Time 0
		CCDC134	2.08369	1.54216	5.24365	0.00032939	0.00317721	3.59102	stage	Time 0
		LRRC34	-1.60194	2.10007	-4.96233	0.000329481	0.00317721	-3.59095	stage	Time 0
		BMPR2	-1.08095	4.61655	-5.34551	0.000329491	0.00317721	-3.59094	stage	Time 0
		BFAR	0.74746	6.93078	5.83836	0.000330079	0.00318041	3.59047	stage	Time 0
		AIG1	0.992589	6.22676	5.36318	0.000333732	0.00321311	3.5876	stage	Time 0
		CCDC122	1.50467	1.50746	5.19194	0.000334204	0.00321515	3.58723	stage	Time 0
		CSDE1	-0.393777	8.78627	-5.38341	0.000335053	0.00322083	-3.58657	stage	Time 0
		ZMIZ2	-0.664793	4.57671	-5.62068	0.000335814	0.00322376	-3.58598	stage	Time 0
		SLC43A2	-0.869645	3.91658	-5.34263	0.000336019	0.00322376	-3.58582	stage	Time 0
		JAKMIP2	-1.63385	4.32593	-4.95034	0.000336186	0.00322376	-3.58569	stage	Time 0
		IL11RA	-1.57598	1.90709	-5.26137	0.000336399	0.00322376	-3.58553	stage	Time 0
		GSTCD	-0.516535	4.11953	-4.94937	0.000336734	0.00322448	-3.58527	stage	Time 0
		COA8	0.840726	6.43383	5.32961	0.000337237	0.0032268	3.58488	stage	Time 0
		ALX1	2.97222	0.132881	5.23379	0.000337766	0.00322937	3.58447	stage	Time 0
		CD248	-2.10556	1.03818	-4.94686	0.00033816	0.00323064	-3.58416	stage	Time 0
		PRMT3	-1.0409	5.02228	-5.29195	0.000340375	0.00324475	-3.58246	stage	Time 0
		MRPS31	-0.78708	6.09378	-5.2794	0.00034054	0.00324475	-3.58233	stage	Time 0
		DDR2	2.23755	0.0550268	5.31101	0.000340829	0.00324475	3.58211	stage	Time 0
		PAFAH2	-0.571559	2.98667	-5.48319	0.000340862	0.00324475	-3.58209	stage	Time 0
		PTAR1	1.20557	5.17286	5.57059	0.000340946	0.00324475	3.58202	stage	Time 0
		C9orf116	1.25895	4.58833	5.32722	0.000341614	0.00324861	3.58151	stage	Time 0
		NCAPD2	-0.999617	6.13987	-6.45759	0.000343603	0.00326502	-3.57999	stage	Time 0
		SCN4B	-2.54043	1.70521	-4.93669	0.000343995	0.00326624	-3.5797	stage	Time 0
		PID1	1.76146	0.820456	5.26075	0.000344983	0.00327311	3.57895	stage	Time 0
		AASDH	-0.627581	4.63772	-4.93407	0.000345519	0.00327368	-3.57854	stage	Time 0
		CRTC1	-0.741339	3.27728	-5.26017	0.000345911	0.00327368	-3.57824	stage	Time 0
		IL32	3.94385	0.0965414	5.17438	0.000345963	0.00327368	3.5782	stage	Time 0
		CNFN	-1.49878	5.04107	-4.93307	0.0003461	0.00327368	-3.5781	stage	Time 0
		AGK	-0.793695	4.61887	-5.23731	0.000346469	0.00327445	-3.57782	stage	Time 0
		SNX21	0.732889	3.65041	5.22712	0.00034671	0.00327445	3.57764	stage	Time 0
		ARHGAP8	0.859888	2.08389	4.93153	0.000346996	0.00327466	3.57742	stage	Time 0
		HAS3	-1.68084	5.26025	-4.9309	0.000347365	0.00327565	-3.57715	stage	Time 0
		ZNF740	-0.842583	2.91475	-5.32278	0.000347649	0.00327584	-3.57693	stage	Time 0
		NT5C3B	0.868208	6.87973	5.59578	0.000351288	0.0033076	3.57421	stage	Time 0
		TCEA2	-0.471578	6.02656	-5.32939	0.000351767	0.0033096	-3.57385	stage	Time 0
		NOXO1	2.67806	1.74975	4.92124	0.000353065	0.00331845	3.57289	stage	Time 0
		CDC42EP5	-2.3587	3.21914	-4.95822	0.000353243	0.00331845	-3.57276	stage	Time 0
		ARSK	0.845793	3.87485	4.91958	0.000354052	0.00332235	3.57216	stage	Time 0
		MYO9A	-0.778058	3.84472	-5.48853	0.000354256	0.00332235	-3.57201	stage	Time 0
		MMACHC	-0.779919	2.14054	-4.91852	0.000354686	0.00332235	-3.57169	stage	Time 0
		GALNT16	-2.08557	1.77953	-4.91845	0.00035473	0.00332235	-3.57166	stage	Time 0
		GBA	0.522322	2.7022	4.91774	0.000355154	0.00332289	3.57134	stage	Time 0
		FAM189A1	-1.35286	1.63273	-4.91746	0.000355325	0.00332289	-3.57122	stage	Time 0
		ROGDI	-0.785941	5.80938	-5.47769	0.000355954	0.00332626	-3.57075	stage	Time 0
		ERC1	0.809103	4.44995	5.27789	0.00035987	0.00336033	3.56789	stage	Time 0
		TRAK2	-0.83858	3.33483	-5.26812	0.000362181	0.00337936	-3.56621	stage	Time 0
		MB	-2.61244	1.28298	-4.90207	0.000364665	0.00339998	-3.56442	stage	Time 0
		NSUN4	0.700203	3.39065	5.28964	0.000366779	0.00341711	3.5629	stage	Time 0
		LDOC1	0.705813	4.87866	5.47878	0.000367373	0.00342007	3.56248	stage	Time 0
		NEFL	3.46992	3.86276	5.22159	0.000368079	0.00342302	3.56197	stage	Time 0
		HIF1AN	-0.557654	4.95438	-5.27243	0.000368242	0.00342302	-3.56186	stage	Time 0
		PTGR1	-1.65453	6.49577	-5.31022	0.000369304	0.00343032	-3.5611	stage	Time 0
		PRMT2	0.753348	5.7384	5.24109	0.000371941	0.00345188	3.55923	stage	Time 0
		SLC2A6	1.22843	4.39923	4.88999	0.000372182	0.00345188	3.55906	stage	Time 0
		TMEM102	1.501	2.28723	5.16348	0.00037262	0.00345336	3.55875	stage	Time 0
		HPF1	-0.732072	6.92676	-5.07916	0.000372912	0.00345348	-3.55855	stage	Time 0
		KLHDC2	-0.613843	6.88816	-5.27145	0.000373768	0.00345799	-3.55794	stage	Time 0
		SPRED2	-0.690829	2.94399	-5.12023	0.000373957	0.00345799	-3.55781	stage	Time 0
		PRKAG1	1.11054	4.18726	5.36915	0.000376324	0.00347728	3.55615	stage	Time 0
		ZNF664	-1.29186	4.59696	-5.579	0.0003776	0.00348647	-3.55526	stage	Time 0
		RFNG	0.687838	4.9764	5.27368	0.000380284	0.00350864	3.5534	stage	Time 0
		CEP89	-1.12538	4.38279	-5.2974	0.000380993	0.00351035	-3.55291	stage	Time 0
		P3H2	2.79272	2.97054	4.87608	0.000381036	0.00351035	3.55288	stage	Time 0
		ZNF835	-3.41955	0.799931	-4.8741	0.000382314	0.0035195	-3.552	stage	Time 0
		HACL1	1.1362	5.04281	5.37384	0.000383515	0.00352794	3.55118	stage	Time 0
		ITLN2	1.92207	1.47316	5.25532	0.000384849	0.00353529	3.55026	stage	Time 0
		DCAF7	0.577383	5.99589	5.32988	0.000384885	0.00353529	3.55024	stage	Time 0
		CSNK1D	-0.528348	6.13431	-4.86781	0.00038641	0.00354667	-3.5492	stage	Time 0
		CYB5R4	0.534258	3.75781	4.86663	0.000387184	0.00355114	3.54867	stage	Time 0
		R3HCC1L	-0.643368	4.0837	-4.86522	0.000388106	0.00355651	-3.54804	stage	Time 0
		ZNF502	4.10104	0.76877	4.86478	0.000388396	0.00355651	3.54785	stage	Time 0
		TP53I3	1.63352	6.01471	5.23527	0.00038863	0.00355651	3.54769	stage	Time 0
		FAR2	1.90883	2.24751	5.15177	0.000389035	0.00355759	3.54741	stage	Time 0
		ZNF566	0.672663	3.77691	4.86248	0.000389912	0.00356233	3.54682	stage	Time 0
		YBX3	0.825999	8.88314	5.24168	0.000390128	0.00356233	3.54667	stage	Time 0
		ODF2	-1.02359	3.29433	-5.21671	0.000392355	0.00358002	-3.54517	stage	Time 0
		FANCE	1.0024	3.24974	6.12502	0.000394258	0.00359474	3.5439	stage	Time 0
		ENDOV	-0.700641	4.69325	-4.85478	0.00039503	0.00359913	-3.54338	stage	Time 0
		RBBP9	-1.13193	3.19348	-5.24184	0.000395764	0.00360317	-3.54289	stage	Time 0
		LLGL2	0.973857	4.75299	5.26721	0.0003971	0.00361268	3.542	stage	Time 0
		MAN1A2	0.660996	4.29783	5.2298	0.000398067	0.00361882	3.54136	stage	Time 0
		LANCL1	-1.28798	4.17774	-5.68214	0.000398628	0.00362126	-3.54099	stage	Time 0
		PARP12	1.45067	1.6954	5.11815	0.00039977	0.00362897	3.54024	stage	Time 0
		ZNF587	1.22006	3.09735	5.07011	0.000401446	0.00364152	3.53913	stage	Time 0
		ZDHHC22	-1.87863	4.36744	-4.84284	0.000403102	0.00365122	-3.53804	stage	Time 0
		C15orf40	0.639763	5.4022	4.84284	0.000403104	0.00365122	3.53804	stage	Time 0
		CADPS	2.73811	1.53103	4.97695	0.000404061	0.00365721	3.53742	stage	Time 0
		PTP4A3	-1.05452	4.70571	-4.83871	0.000405937	0.00366931	-3.53619	stage	Time 0
		RBM5	-0.528905	5.41939	-5.27549	0.000406209	0.00366931	-3.53602	stage	Time 0
		PIGBOS1	-1.016	5.58054	-4.83821	0.000406286	0.00366931	-3.53597	stage	Time 0
		COL9A3	2.14533	5.10929	5.10361	0.000409542	0.00369602	3.53386	stage	Time 0
		LIMK1	-0.59641	5.59873	-4.83284	0.000410004	0.0036975	-3.53356	stage	Time 0
		EXD2	0.813803	3.3608	4.83166	0.000410824	0.00370193	3.53303	stage	Time 0
		C17orf67	-0.869305	3.08592	-5.07684	0.000411093	0.00370193	-3.53286	stage	Time 0
		ZNF224	0.904611	2.7934	4.83001	0.000411977	0.00370719	3.53229	stage	Time 0
		TIMM8A	-0.949349	6.87892	-5.14742	0.000414942	0.00373098	-3.53039	stage	Time 0
		AJM1	-1.05132	1.2332	-4.82539	0.000415223	0.00373098	-3.53021	stage	Time 0
		DDX58	1.3451	1.75978	4.82144	0.000418019	0.00375339	3.52844	stage	Time 0
		UBA3	-0.494546	2.95223	-4.82067	0.000418561	0.00375553	-3.5281	stage	Time 0
		KIF16B	0.593033	2.54708	4.81899	0.000419763	0.00376359	3.52734	stage	Time 0
		ZNF33A	0.707487	4.9955	5.16274	0.000420275	0.00376546	3.52701	stage	Time 0
		CC2D1A	0.433801	3.43825	4.81776	0.000420636	0.00376597	3.52679	stage	Time 0
		BCAP29	1.31298	1.06892	5.1489	0.00042123	0.00376738	3.52641	stage	Time 0
		RUNX1T1	1.17922	4.47117	4.81669	0.000421402	0.00376738	3.5263	stage	Time 0
		ZNF438	-1.09333	0.730246	-5.33715	0.00042422	0.00378955	-3.52454	stage	Time 0
		CUX1	0.803857	4.67004	5.1292	0.000424493	0.00378955	3.52437	stage	Time 0
		SPIRE1	1.26774	3.08633	4.80995	0.00042626	0.00380258	3.52327	stage	Time 0
		ENTR1	-0.383912	6.71167	-5.22974	0.00042878	0.00381795	-3.52171	stage	Time 0
		DUSP18	1.00616	1.01411	4.99852	0.000428835	0.00381795	3.52167	stage	Time 0
		CNTD2	-1.68381	0.431511	-4.80631	0.000428907	0.00381795	-3.52163	stage	Time 0
		RCOR2	-0.591131	6.23405	-4.98674	0.000429574	0.00381935	-3.52121	stage	Time 0
		ZNF347	0.611472	2.47022	5.34716	0.000429741	0.00381935	3.52111	stage	Time 0
		EXO1	-0.702367	4.0558	-4.80449	0.00043024	0.00381935	-3.5208	stage	Time 0
		CETN2	-0.876882	6.39061	-4.80441	0.000430297	0.00381935	-3.52077	stage	Time 0
		NCBP2	-0.54182	7.58709	-5.16557	0.000430708	0.00382026	-3.52052	stage	Time 0
		TRIM59	0.678132	4.4654	4.8033	0.000431109	0.00382108	3.52027	stage	Time 0
		PEAK1	-1.21355	4.3341	-4.80231	0.000431836	0.00382479	-3.51982	stage	Time 0
		SIK2	-0.700329	2.66405	-5.14908	0.000432317	0.0038254	-3.51953	stage	Time 0
		CCAR2	-0.714037	5.1197	-5.04014	0.000432522	0.0038254	-3.5194	stage	Time 0
		GNB5	0.659436	4.44518	4.80025	0.000433352	0.00383001	3.51889	stage	Time 0
		C5orf63	-4.15167	0.552088	-4.80193	0.00043439	0.00383373	-3.51826	stage	Time 0
		SCARF2	1.91904	2.44368	4.85801	0.000434393	0.00383373	3.51826	stage	Time 0
		DOCK9	1.58399	1.60278	5.03147	0.000435024	0.0038364	3.51787	stage	Time 0
		CLUH	-0.817232	4.84983	-5.30714	0.000435315	0.0038364	-3.51769	stage	Time 0
		DNER	1.97879	1.17268	5.06564	0.000436523	0.00384432	3.51696	stage	Time 0
		USP13	-0.360925	4.48638	-4.79515	0.000437133	0.00384696	-3.51659	stage	Time 0
		USB1	0.473866	6.26882	4.79456	0.000437573	0.00384804	3.51632	stage	Time 0
		CHST6	1.12573	2.81632	5.27897	0.000437877	0.00384804	3.51614	stage	Time 0
		TGIF2	-0.73467	5.57255	-4.79294	0.000438776	0.00385321	-3.51559	stage	Time 0
		GCH1	1.51797	2.11427	5.06799	0.000439375	0.00385574	3.51523	stage	Time 0
		RALBP1	0.450899	6.84015	4.78929	0.000441513	0.00387175	3.51394	stage	Time 0
		SLC38A5	-0.960454	4.99581	-4.78673	0.000443445	0.00388594	-3.51278	stage	Time 0
		ZNF324B	-0.785138	0.495066	-5.10111	0.000444442	0.00389193	-3.51218	stage	Time 0
		CD52	-2.18832	0.952814	-4.77909	0.000449257	0.00393132	-3.50932	stage	Time 0
		POLI	-0.89317	4.35244	-5.09111	0.000452533	0.00395719	-3.50739	stage	Time 0
		ACTR8	0.784861	3.81972	5.58869	0.000453041	0.00395883	3.50709	stage	Time 0
		FBXO2	1.3553	6.27439	4.77203	0.000454694	0.00397048	3.50612	stage	Time 0
		ZNF202	-0.455177	3.94721	-4.7711	0.000455413	0.00397156	-3.5057	stage	Time 0
		RBMXL1	-0.922777	5.26711	-4.94664	0.000455459	0.00397156	-3.50567	stage	Time 0
		RWDD4	-0.319341	6.13712	-4.7702	0.000456115	0.00397345	-3.50529	stage	Time 0
		VPS37C	0.493576	3.53124	4.76961	0.000456577	0.00397345	3.50502	stage	Time 0
		ZNF304	-0.70644	2.36677	-5.10717	0.000456651	0.00397345	-3.50497	stage	Time 0
		NPHP4	1.41915	2.37233	4.85875	0.000456958	0.00397345	3.5048	stage	Time 0
		OXSR1	-0.499792	5.19228	-5.21931	0.000457419	0.00397386	-3.50453	stage	Time 0
		CPLANE2	-1.3153	1.3833	-5.10084	0.000457646	0.00397386	-3.50439	stage	Time 0
		XKR6	0.468159	3.57765	5.22215	0.00046005	0.00399193	3.503	stage	Time 0
		TIMM10	0.661409	7.1617	5.10802	0.000460802	0.00399566	3.50256	stage	Time 0
		CRLF3	-0.561896	4.22255	-5.58876	0.000464796	0.00402747	-3.50027	stage	Time 0
		GRK2	-0.604236	5.40026	-4.75827	0.000465498	0.00403074	-3.49986	stage	Time 0
		DDX23	-0.586197	6.002	-4.75697	0.000466531	0.00403686	-3.49927	stage	Time 0
		ARAP1	1.28748	2.72075	4.75566	0.000467573	0.00404306	3.49868	stage	Time 0
		ATPAF1	-0.630059	5.62075	-4.75465	0.000468386	0.00404726	-3.49821	stage	Time 0
		CAB39L	-0.7664	2.598	-4.75419	0.000468751	0.00404759	-3.49801	stage	Time 0
		NBL1	1.61372	3.06479	5.10336	0.000470709	0.00406167	3.49689	stage	Time 0
		TBC1D25	-0.705764	2.56393	-5.17116	0.000472793	0.00407681	-3.49572	stage	Time 0
		BORCS7	0.841842	4.38637	5.09638	0.000473259	0.00407799	3.49545	stage	Time 0
		KLHL18	0.729057	4.08148	5.01933	0.000474088	0.00407992	3.49499	stage	Time 0
		SLC30A9	-0.440779	5.55533	-5.08381	0.000474141	0.00407992	-3.49496	stage	Time 0
		SPECC1	0.877878	5.27995	5.18394	0.000475807	0.00409138	3.49402	stage	Time 0
		AZI2	0.381649	5.40233	5.85172	0.000476599	0.00409138	3.49357	stage	Time 0
		DPYSL2	-1.18151	7.49749	-5.22502	0.000476679	0.00409138	-3.49353	stage	Time 0
		SNN	0.500665	5.30044	4.74423	0.000476794	0.00409138	3.49347	stage	Time 0
		ACVR1B	-0.761332	3.46663	-5.48113	0.000477263	0.00409257	-3.4932	stage	Time 0
		TXNL4A	0.556171	8.36399	5.21919	0.000478256	0.00409825	3.49265	stage	Time 0
		RUSC2	-0.765258	1.34619	-4.74167	0.000478889	0.00410084	-3.49229	stage	Time 0
		SPINK2	2.15763	1.02549	4.93002	0.000483988	0.00414164	3.48947	stage	Time 0
		BSPRY	0.873656	3.25367	4.73385	0.000485336	0.00414943	3.48872	stage	Time 0
		NME6	1.3876	4.60067	4.73357	0.000485568	0.00414943	3.48859	stage	Time 0
		UBE4A	-0.277327	4.84909	-4.7327	0.000486288	0.00415272	-3.4882	stage	Time 0
		ORAI1	0.515015	5.87577	4.73195	0.000486916	0.00415319	3.48785	stage	Time 0
		ATP10D	0.983647	1.26399	4.73183	0.000487013	0.00415319	3.4878	stage	Time 0
		MLPH	2.32676	0.77111	4.72894	0.000489429	0.00417092	3.48648	stage	Time 0
		TMEM44	-0.709169	3.58007	-5.05637	0.000490041	0.00417326	-3.48614	stage	Time 0
		NAA60	0.275771	5.35239	4.72685	0.000491183	0.00418012	3.48552	stage	Time 0
		COQ9	-0.636363	5.91021	-5.07673	0.000492079	0.00418433	-3.48503	stage	Time 0
		PPM1L	-0.878179	3.14937	-4.72546	0.000492354	0.00418433	-3.48488	stage	Time 0
		RNF175	1.51363	3.18367	4.72469	0.000493002	0.00418697	3.48453	stage	Time 0
		ISCU	0.778442	7.5029	5.56664	0.000495026	0.00419975	3.48343	stage	Time 0
		TAS2R14	-0.755929	1.74768	-4.72211	0.000495185	0.00419975	-3.48335	stage	Time 0
		RAB32	1.75238	4.26028	5.04546	0.000498581	0.00422566	3.48152	stage	Time 0
		NR5A2	2.2098	1.40014	4.98702	0.000499635	0.00422866	3.48095	stage	Time 0
		PALM	1.32936	2.57148	4.71666	0.000499827	0.00422866	3.48085	stage	Time 0
		UNC13B	-0.819373	4.28465	-5.11644	0.000499959	0.00422866	-3.48078	stage	Time 0
		SPRYD3	-0.620671	1.9256	-4.8958	0.000500599	0.00423119	-3.48044	stage	Time 0
		LY6G5C	-1.57763	2.03906	-5.04907	0.000502899	0.00424749	-3.47921	stage	Time 0
		XPA	-1.08058	4.4549	-4.71272	0.000503213	0.00424749	-3.47904	stage	Time 0
		GATC	-0.966161	1.70848	-4.71077	0.000504899	0.00425725	-3.47814	stage	Time 0
		SLC9A3R2	0.91689	4.50694	5.11591	0.000505057	0.00425725	3.47806	stage	Time 0
		LYPLA1	0.748831	7.91383	5.06148	0.000505957	0.00426194	3.47758	stage	Time 0
		SEMA6D	-1.80866	1.80536	-4.70805	0.000507253	0.00426995	-3.4769	stage	Time 0
		FAIM	1.68936	4.41458	5.06857	0.000508175	0.00427481	3.47641	stage	Time 0
		ERCC3	-0.647024	4.67452	-5.14186	0.000510666	0.00429285	-3.4751	stage	Time 0
		EXOC3	-0.639688	4.50366	-4.70124	0.000513216	0.00431136	-3.47376	stage	Time 0
		KLC1	-0.545077	5.833	-5.34834	0.00051532	0.0043261	-3.47266	stage	Time 0
		ZNF343	-1.40567	0.184188	-4.6971	0.000516873	0.00433237	-3.47186	stage	Time 0
		WFS1	-0.715351	3.95116	-4.69702	0.000516945	0.00433237	-3.47182	stage	Time 0
		STON2	-1.07075	4.2644	-4.69682	0.000517115	0.00433237	-3.47173	stage	Time 0
		PIGW	0.857856	4.11305	4.9543	0.000517943	0.00433637	3.4713	stage	Time 0
		DEPDC1	-0.56049	5.63599	-5.49865	0.000519657	0.00434779	-3.47041	stage	Time 0
		RBM38	0.693948	6.00546	5.07048	0.000522229	0.00436636	3.46909	stage	Time 0
		NOC4L	-0.717704	5.91846	-4.68896	0.000524143	0.0043794	-3.4681	stage	Time 0
		ARPC1A	0.645938	7.97808	5.03981	0.000524868	0.00437979	3.46773	stage	Time 0
		EHHADH	-1.95504	1.15308	-4.99529	0.000524896	0.00437979	-3.46772	stage	Time 0
		TRIB2	0.78993	4.39155	5.07726	0.000525985	0.00438592	3.46716	stage	Time 0
		ATIC	1.28595	6.7365	5.16476	0.000530543	0.00442095	3.46484	stage	Time 0
		NXT1	-0.737078	6.57548	-4.92327	0.000532508	0.00443319	-3.46385	stage	Time 0
		ADAM15	1.01254	3.53382	5.00733	0.000532875	0.00443319	3.46366	stage	Time 0
		SCML2	-0.682556	4.05718	-4.67911	0.000533085	0.00443319	-3.46356	stage	Time 0
		SAV1	0.562506	6.10998	4.67836	0.000533774	0.00443594	3.46321	stage	Time 0
		ASAH2	-0.880798	2.87713	-5.0185	0.000535508	0.00444737	-3.46234	stage	Time 0
		DDX19A	-0.521546	4.8874	-4.99541	0.000536344	0.00445133	-3.46192	stage	Time 0
		ARAP2	-1.25025	0.544851	-4.67508	0.000536781	0.00445198	-3.4617	stage	Time 0
		NPAT	-0.581643	4.29407	-5.06335	0.000537141	0.00445198	-3.46152	stage	Time 0
		POLG	-0.499712	4.46359	-4.66983	0.000541651	0.00448636	-3.45927	stage	Time 0
		ZBTB8OS	-0.687992	7.51968	-5.05547	0.00054357	0.00449925	-3.45831	stage	Time 0
		ETV2	-1.05845	1.07475	-4.91761	0.000546757	0.0045226	-3.45674	stage	Time 0
		HSPA4	-0.624889	8.20311	-5.04151	0.000547718	0.00452753	-3.45626	stage	Time 0
		CTDNEP1	0.511368	6.88233	5.28738	0.000548791	0.00453201	3.45574	stage	Time 0
		RAB4A	0.673083	6.77876	4.97436	0.000548991	0.00453201	3.45564	stage	Time 0
		BBS12	-0.630501	2.16138	-4.8054	0.000550565	0.00454002	-3.45487	stage	Time 0
		LIAS	0.613738	5.00932	5.05378	0.000550695	0.00454002	3.4548	stage	Time 0
		SDCBP2	1.25426	2.55456	4.94118	0.000551379	0.00454264	3.45447	stage	Time 0
		ABL1	-0.7299	5.29412	-4.97317	0.000552243	0.00454674	-3.45405	stage	Time 0
		PKP3	2.86401	1.18626	4.65644	0.000554274	0.00456043	3.45306	stage	Time 0
		ABCC3	-2.10751	0.607669	-4.93232	0.000555679	0.00456895	-3.45237	stage	Time 0
		STK16	-0.653935	5.79936	-4.91825	0.000557162	0.00457556	-3.45165	stage	Time 0
		GCDH	-0.8205	5.81765	-5.01771	0.000557596	0.00457556	-3.45144	stage	Time 0
		SPSB1	0.953822	0.920179	4.96952	0.000557788	0.00457556	3.45135	stage	Time 0
		ZCCHC24	-0.83217	2.47909	-4.65259	0.000557959	0.00457556	-3.45127	stage	Time 0
		TMCO1	0.453322	7.08777	4.85079	0.000560488	0.00459128	3.45005	stage	Time 0
		CORO2B	-1.36835	1.62692	-4.64983	0.000560617	0.00459128	-3.44999	stage	Time 0
		RASL10A	1.52143	1.48065	4.9736	0.000561296	0.0045938	3.44966	stage	Time 0
		ZNF124	0.941081	3.81633	4.94934	0.000561816	0.00459502	3.44941	stage	Time 0
		TMEM108	1.56012	2.01705	4.84658	0.000563416	0.00460507	3.44864	stage	Time 0
		CST3	1.5019	6.11436	5.62491	0.000564508	0.00461096	3.44812	stage	Time 0
		BAZ1A	0.901508	5.47462	4.85861	0.0005656	0.00461612	3.4476	stage	Time 0
		SSH2	0.830827	3.70832	5.34465	0.000565886	0.00461612	3.44746	stage	Time 0
		PROSER2	-0.852782	4.25718	-4.64351	0.000566749	0.00462002	-3.44705	stage	Time 0
		SMO	-0.82597	5.06146	-5.05526	0.000567109	0.00462002	-3.44688	stage	Time 0
		CUEDC2	-0.969541	6.68063	-4.96684	0.000568678	0.00462975	-3.44613	stage	Time 0
		PPP1R1C	3.65967	0.774994	4.8997	0.000570042	0.00463781	3.44548	stage	Time 0
		C12orf65	0.89889	4.86192	4.95726	0.000570666	0.00463984	3.44519	stage	Time 0
		MTRR	-0.615253	4.33629	-4.85802	0.00057218	0.0046466	-3.44447	stage	Time 0
		ZYG11B	-0.646489	4.67464	-4.97708	0.000572247	0.0046466	-3.44444	stage	Time 0
		RNF135	-0.37645	4.32146	-4.63734	0.000572803	0.00464807	-3.44418	stage	Time 0
		ZNF888	-0.845097	2.0036	-4.9579	0.000573261	0.00464874	-3.44396	stage	Time 0
		PLAGL2	-0.660874	4.78874	-4.97826	0.000574152	0.00465176	-3.44354	stage	Time 0
		FJX1	1.61987	5.04028	4.83357	0.000574384	0.00465176	3.44343	stage	Time 0
		CCDC90B	0.855435	7.00031	4.63333	0.000576779	0.00466811	3.44231	stage	Time 0
		WARS2	0.667041	3.6743	4.94976	0.000577918	0.00467427	3.44177	stage	Time 0
		DPPA3	-2.3497	0.5517	-4.63129	0.000578809	0.00467842	-3.44135	stage	Time 0
		SCO2	0.629749	5.66382	4.62694	0.00058317	0.00470718	3.43932	stage	Time 0
		STAG3	1.058	0.431743	5.06532	0.000583209	0.00470718	3.43931	stage	Time 0
		TK2	-1.01169	2.33103	-4.6266	0.000583506	0.00470718	-3.43917	stage	Time 0
		INKA2	1.64311	2.81369	4.71737	0.000585444	0.00471974	3.43827	stage	Time 0
		PCNX3	1.03041	3.56597	4.91829	0.000586773	0.00472738	3.43766	stage	Time 0
		SDCCAG8	1.72744	3.39916	4.72949	0.000588833	0.00474089	3.43671	stage	Time 0
		SGSM1	2.1756	0.377511	5.33392	0.00059209	0.00476159	3.43521	stage	Time 0
		FBXL15	0.996217	5.26174	4.61806	0.000592172	0.00476159	3.43517	stage	Time 0
		RFWD3	-0.631215	5.5636	-4.97796	0.000593194	0.00476671	-3.43471	stage	Time 0
		SREBF2	-0.839277	6.00231	-5.23424	0.000595198	0.00477972	-3.43379	stage	Time 0
		EPN1	0.355957	7.04957	4.61142	0.000598998	0.00480712	3.43207	stage	Time 0
		PCDHB14	-0.883179	1.06379	-4.97716	0.000600024	0.00481223	-3.4316	stage	Time 0
		UBQLN2	-0.6689	4.5509	-4.80063	0.000602106	0.00482305	-3.43066	stage	Time 0
		CD24	-0.962731	11.4875	-5.0704	0.000602152	0.00482305	-3.43064	stage	Time 0
		ADAP1	1.20606	1.78358	4.9224	0.000603449	0.00483032	3.43006	stage	Time 0
		HPS3	0.988722	4.19901	4.60671	0.000603894	0.00483076	3.42986	stage	Time 0
		PLD2	0.837803	3.21163	5.01328	0.000604958	0.00483372	3.42938	stage	Time 0
		ZNF473	-0.453454	2.78162	-4.60538	0.000605281	0.00483372	-3.42924	stage	Time 0
		ZNF329	-0.64834	2.76855	-4.605	0.000605681	0.00483372	-3.42906	stage	Time 0
		GDAP1	1.39468	4.40683	5.0129	0.000605824	0.00483372	3.42899	stage	Time 0
		FAM174A	1.72994	2.93114	4.59779	0.000613266	0.0048896	3.42568	stage	Time 0
		DNAJC13	-0.435521	4.29393	-4.59746	0.000613617	0.0048896	-3.42552	stage	Time 0
		ZNF726	-1.77709	3.506	-4.81253	0.000617675	0.00491877	-3.42373	stage	Time 0
		ID1	2.0009	7.36385	4.84194	0.000619161	0.00492744	3.42308	stage	Time 0
		EEF1AKMT3	-1.00483	1.43073	-4.59093	0.000620589	0.00493564	-3.42245	stage	Time 0
		TOMM34	-0.546929	5.43359	-4.58963	0.000621979	0.00494352	-3.42184	stage	Time 0
		SPTLC2	0.413728	4.80467	4.91922	0.000625347	0.00496483	3.42038	stage	Time 0
		ZFP82	1.18829	4.1451	4.90245	0.000625812	0.00496483	3.42017	stage	Time 0
		FAM209B	-1.50881	0.795937	-4.83449	0.000625862	0.00496483	-3.42015	stage	Time 0
		PGBD2	-0.887116	3.71788	-4.95303	0.000627322	0.00497322	-3.41952	stage	Time 0
		HHLA1	3.1057	2.00297	4.58734	0.000627891	0.00497455	3.41927	stage	Time 0
		C6orf163	-1.26145	0.915041	-4.82049	0.000628767	0.00497546	-3.41889	stage	Time 0
		ANKHD1	0.847255	3.3586	4.80015	0.000629802	0.00497546	3.41844	stage	Time 0
		SH3BP5	0.904733	3.62898	4.89027	0.000630016	0.00497546	3.41835	stage	Time 0
		TBC1D10A	-0.704566	2.52548	-4.58187	0.000630393	0.00497546	-3.41819	stage	Time 0
		SPG7	-0.486716	6.30204	-4.5818	0.000630464	0.00497546	-3.41816	stage	Time 0
		CCNH	0.588706	5.20225	4.58165	0.000630627	0.00497546	3.41809	stage	Time 0
		DLAT	-0.622829	5.67401	-4.58148	0.000630816	0.00497546	-3.41801	stage	Time 0
		DUSP7	-0.920003	3.04376	-4.90801	0.00063164	0.00497879	-3.41765	stage	Time 0
		ACOX3	0.989545	2.09618	4.95133	0.000634933	0.00499891	3.41624	stage	Time 0
		MIB1	-0.943991	5.64456	-4.57766	0.000635	0.00499891	-3.41621	stage	Time 0
		MPP1	2.10937	2.13932	4.74842	0.000636254	0.0050056	3.41567	stage	Time 0
		GLT8D2	1.67478	1.53219	4.57506	0.000637862	0.00501507	3.41498	stage	Time 0
		AVEN	-0.917458	6.84141	-4.83437	0.000639453	0.00502439	-3.4143	stage	Time 0
		TRIM71	-0.795288	7.07412	-4.92155	0.000640503	0.00502945	-3.41386	stage	Time 0
		NPR1	-1.79487	3.08056	-4.57055	0.000642866	0.00504481	-3.41285	stage	Time 0
		NAB2	-1.17774	3.52545	-4.56883	0.00064478	0.00505662	-3.41204	stage	Time 0
		CHKA	0.647139	5.43391	5.01004	0.000645209	0.00505679	3.41186	stage	Time 0
		CENPA	1.03912	5.54788	4.56674	0.000647123	0.00506859	3.41105	stage	Time 0
		HLA-DPA1	2.52839	1.21492	4.74169	0.000649611	0.00508486	3.41001	stage	Time 0
		FAM111B	5.41972	1.88497	4.9288	0.000653952	0.0051156	3.40819	stage	Time 0
		MYRF	-1.42312	0.724154	-4.56022	0.00065448	0.00511651	-3.40797	stage	Time 0
		N4BP3	0.643061	5.34924	4.55896	0.000655909	0.00512444	3.40738	stage	Time 0
		TMEM116	0.749723	3.47419	4.55683	0.000658334	0.00514015	3.40637	stage	Time 0
		CRABP2	2.61201	6.10905	4.87373	0.000658966	0.00514184	3.40611	stage	Time 0
		ADAMTS16	1.76667	1.36532	4.75906	0.000659764	0.00514483	3.40578	stage	Time 0
		DNAAF3	-1.53386	2.27271	-4.78636	0.000661711	0.00515677	-3.40497	stage	Time 0
		NRN1L	-2.00924	4.94625	-4.8626	0.000663393	0.00516663	-3.40428	stage	Time 0
		DYNC1H1	-0.5397	7.47309	-4.85693	0.000663814	0.00516666	-3.4041	stage	Time 0
		KCTD20	0.379708	4.53497	4.55106	0.000664956	0.00517229	3.40363	stage	Time 0
		MDC1	-0.560506	5.01789	-4.84867	0.000666292	0.00517944	-3.40309	stage	Time 0
		CBX2	-0.968686	5.41535	-4.89594	0.000667028	0.00518191	-3.40278	stage	Time 0
		DUSP13	-1.53621	1.38929	-4.62205	0.000671967	0.005217	-3.40077	stage	Time 0
		ONECUT1	3.55939	0.403298	4.64593	0.00067388	0.00522309	3.39999	stage	Time 0
		TICRR	-0.482509	3.96362	-4.54337	0.000673886	0.00522309	-3.39999	stage	Time 0
		HDAC8	-0.460327	4.7707	-4.96321	0.000674015	0.00522309	-3.39994	stage	Time 0
		DRD4	2.91679	0.866535	4.57922	0.0006755	0.00523133	3.39933	stage	Time 0
		CRB3	1.52156	4.32009	5.13521	0.00067601	0.005232	3.39913	stage	Time 0
		HYAL1	-1.8756	1.13479	-4.54035	0.000677428	0.00523971	-3.39856	stage	Time 0
		PPP1R3F	0.882325	2.77269	4.94767	0.000678677	0.00524379	3.39805	stage	Time 0
		IARS1	-0.519236	7.72664	-4.97439	0.000678802	0.00524379	-3.398	stage	Time 0
		AP2A1	-0.441092	6.15513	-4.90002	0.000679463	0.00524562	-3.39773	stage	Time 0
		MRPS16	-0.67463	8.40814	-4.82016	0.000680558	0.00525081	-3.39729	stage	Time 0
		S100PBP	-0.636187	5.20568	-4.53698	0.000681401	0.00525403	-3.39696	stage	Time 0
		CENPE	-0.883378	6.21677	-4.77617	0.000682083	0.00525602	-3.39668	stage	Time 0
		MOK	1.84107	0.0360326	4.79397	0.00068888	0.00530281	3.39397	stage	Time 0
		SLC25A19	0.687132	4.65558	4.53059	0.00068901	0.00530281	3.39392	stage	Time 0
		MERTK	-2.02975	2.61255	-4.61041	0.000690103	0.00530793	-3.39348	stage	Time 0
		MED29	-0.651819	5.6301	-4.84015	0.000692021	0.00531938	-3.39272	stage	Time 0
		ASTN1	-2.58867	1.14638	-4.52711	0.000693186	0.00532474	-3.39226	stage	Time 0
		ATP6AP2	0.615178	6.46516	4.52678	0.000693578	0.00532474	3.39211	stage	Time 0
		SCAMP4	0.390724	5.23652	4.52634	0.000694112	0.00532554	3.39189	stage	Time 0
		CD99	1.16454	6.48835	4.84088	0.00069532	0.00533114	3.39142	stage	Time 0
		SLC35B3	0.926212	3.19634	4.74094	0.000695703	0.00533114	3.39127	stage	Time 0
		TC2N	1.26043	2.67387	4.76391	0.00069664	0.00533502	3.3909	stage	Time 0
		IPO11	-0.747439	4.69685	-4.91313	0.000698343	0.00534476	-3.39023	stage	Time 0
		SLC44A2	-0.678696	5.14191	-4.7186	0.000699108	0.00534732	-3.38993	stage	Time 0
		GRN	0.546827	6.23061	4.81424	0.000701753	0.00536347	3.38889	stage	Time 0
		ZFAND4	1.13277	1.54213	5.8561	0.000702191	0.00536347	3.38872	stage	Time 0
		DHRS7B	1.07817	4.46374	4.80508	0.000702519	0.00536347	3.38859	stage	Time 0
		DCAF12	0.534386	3.933	4.71074	0.000703875	0.00537052	3.38807	stage	Time 0
		BRAT1	0.491753	4.36924	4.51751	0.000704843	0.00537459	3.38769	stage	Time 0
		GPR135	-1.22769	0.996938	-4.51665	0.000705907	0.00537939	-3.38727	stage	Time 0
		ABHD14A	-1.02794	4.29323	-4.77466	0.000706384	0.00537972	-3.38709	stage	Time 0
		GRAMD2B	1.17218	2.6373	4.88883	0.000707592	0.00538425	3.38662	stage	Time 0
		TMC7	-0.72441	1.75616	-4.51507	0.000707848	0.00538425	-3.38652	stage	Time 0
		ATAD3A	0.775646	5.69862	4.51459	0.000708433	0.00538539	3.38629	stage	Time 0
		FAHD2B	0.993377	4.20923	4.67609	0.00070997	0.0053897	3.3857	stage	Time 0
		SMYD4	0.835144	2.31026	4.51315	0.000710208	0.0053897	3.38561	stage	Time 0
		ZNF234	0.815675	2.61452	4.70173	0.000710304	0.0053897	3.38557	stage	Time 0
		SCAMP5	-1.05627	4.90953	-4.5122	0.000711385	0.00539359	-3.38515	stage	Time 0
		HIGD2A	0.463981	7.92737	4.80718	0.000711687	0.00539359	3.38504	stage	Time 0
		MRPS7	0.585116	7.88763	4.51112	0.000712725	0.00539815	3.38464	stage	Time 0
		MMGT1	0.570723	3.76291	4.82474	0.000717703	0.00543254	3.38273	stage	Time 0
		ASB7	-0.509466	2.91856	-4.81358	0.000718725	0.00543695	-3.38233	stage	Time 0
		ZNF564	-0.674917	1.79828	-4.50375	0.000721919	0.00545778	-3.38112	stage	Time 0
		JDP2	1.69976	4.04502	4.7317	0.00072393	0.00546785	3.38035	stage	Time 0
		C1orf174	0.653033	5.4945	4.80154	0.000724134	0.00546785	3.38027	stage	Time 0
		PCDHGA6	-1.12711	0.265325	-4.50044	0.000726098	0.00547827	-3.37953	stage	Time 0
		QKI	-0.364085	6.92312	-4.73915	0.000726398	0.00547827	-3.37942	stage	Time 0
		NOL6	-0.825439	4.65021	-4.49659	0.000730982	0.00550949	-3.37769	stage	Time 0
		RBM12	-0.75121	5.84369	-4.85315	0.000734526	0.00553283	-3.37636	stage	Time 0
		ANAPC16	0.748495	7.60728	4.49159	0.000737374	0.00555091	3.37529	stage	Time 0
		FBLN5	1.44317	0.395731	4.71818	0.000739733	0.00556529	3.37441	stage	Time 0
		MBOAT7	-0.724333	6.17382	-4.48841	0.000741472	0.00557499	-3.37377	stage	Time 0
		MPV17L	-1.13459	2.69215	-4.81818	0.000744473	0.00559266	-3.37265	stage	Time 0
		ATP6V0D1	-0.792711	6.42878	-4.4859	0.000744726	0.00559266	-3.37256	stage	Time 0
		PI4KA	-0.4659	3.34771	-4.84427	0.000745698	0.00559658	-3.3722	stage	Time 0
		C15orf61	1.31998	4.13809	5.30128	0.000748147	0.00561155	3.3713	stage	Time 0
		NIF3L1	1.02384	5.45351	4.78282	0.000749349	0.00561717	3.37086	stage	Time 0
		LHX2	-3.88874	1.15008	-4.48124	0.000751354	0.00562568	-3.37012	stage	Time 0
		CCDC153	-1.21209	2.37974	-4.64879	0.000751392	0.00562568	-3.37011	stage	Time 0
		CACNA2D2	-0.888664	2.87035	-4.4788	0.000754001	0.0056418	-3.36915	stage	Time 0
		ALKBH8	-0.724761	3.47281	-4.47696	0.00075642	0.00565649	-3.36827	stage	Time 0
		TRIP12	-0.514029	5.76818	-4.71969	0.000759771	0.00567812	-3.36705	stage	Time 0
		CCDC93	0.827648	3.15888	4.88445	0.000761406	0.00568691	3.36646	stage	Time 0
		CACNG5	-1.70772	0.330149	-4.95826	0.000765395	0.00571326	-3.36502	stage	Time 0
		WDR46	-0.601786	6.71961	-4.4698	0.000765929	0.0057138	-3.36482	stage	Time 0
		FRAT1	1.51035	1.75276	4.63542	0.000769279	0.00573534	3.36362	stage	Time 0
		SCRIB	-0.452239	4.8003	-4.71461	0.000770196	0.0057381	-3.36329	stage	Time 0
		SMYD3	0.676415	4.69103	4.83874	0.000770575	0.0057381	3.36315	stage	Time 0
		POP4	0.758206	5.32926	4.46575	0.000771354	0.00574045	3.36287	stage	Time 0
		TRAPPC10	0.918686	4.0016	4.7864	0.000772445	0.00574512	3.36248	stage	Time 0
		DZANK1	-1.16529	3.64676	-4.46339	0.000774544	0.00575621	-3.36174	stage	Time 0
		SIRT4	-0.859736	1.55566	-4.46315	0.000774866	0.00575621	-3.36162	stage	Time 0
		FOXL2	2.96766	0.747947	4.67767	0.000776536	0.00576516	3.36103	stage	Time 0
		MIS12	0.467618	4.64962	4.79076	0.000781626	0.00579948	3.35922	stage	Time 0
		STOM	1.62636	3.73649	4.73821	0.000782766	0.00580446	3.35882	stage	Time 0
		ARHGAP19	-0.835339	3.86948	-4.45602	0.000784578	0.00581442	-3.35818	stage	Time 0
		PLIN3	0.729382	6.52957	4.75454	0.00078789	0.00583547	3.35701	stage	Time 0
		MKS1	-0.715563	3.59878	-4.78636	0.000788463	0.00583623	-3.35681	stage	Time 0
		CCDC144A	1.40041	0.155379	4.62897	0.000791936	0.00585829	3.3556	stage	Time 0
		ZBTB3	-0.671583	4.16667	-4.45017	0.000792628	0.00585829	-3.35536	stage	Time 0
		TUNAR	1.70042	4.13854	4.69914	0.00079338	0.00585829	3.35509	stage	Time 0
		KAT2A	-0.549676	4.32685	-4.44939	0.000793712	0.00585829	-3.35498	stage	Time 0
		PDCD2	0.79098	7.69115	5.09863	0.000793808	0.00585829	3.35494	stage	Time 0
		CRTC3	0.833445	2.18634	4.76907	0.000797509	0.0058821	3.35366	stage	Time 0
		ABHD4	-1.20138	4.1527	-4.8321	0.000798243	0.00588402	-3.3534	stage	Time 0
		IQSEC1	-0.73167	3.92338	-4.44269	0.000803071	0.00591532	-3.35173	stage	Time 0
		MDH1	-0.833091	9.33199	-4.73805	0.000803651	0.00591532	-3.35153	stage	Time 0
		PRKAR2A	0.404884	5.85504	4.74514	0.000803922	0.00591532	3.35144	stage	Time 0
		CLBA1	-1.03834	1.45013	-4.44145	0.000804803	0.00591829	-3.35114	stage	Time 0
		ARL8B	-0.640474	5.43533	-4.73054	0.000808424	0.00594139	-3.34989	stage	Time 0
		ZSWIM1	-1.13143	1.40871	-4.67861	0.000809228	0.00594378	-3.34962	stage	Time 0
		RFFL	-0.858546	3.34306	-4.43633	0.000812045	0.00596093	-3.34866	stage	Time 0
		PKN3	-0.853722	3.51728	-4.43277	0.000817118	0.00599389	-3.34693	stage	Time 0
		TTC14	-0.419533	5.22036	-4.43242	0.000817624	0.00599389	-3.34676	stage	Time 0
		TCF12	-0.919271	5.57946	-4.73262	0.000817986	0.00599389	-3.34664	stage	Time 0
		ASS1	-1.22701	6.1573	-4.76119	0.000819765	0.00600337	-3.34603	stage	Time 0
		GEMIN6	-0.807478	6.63968	-4.71342	0.000820275	0.00600356	-3.34586	stage	Time 0
		MCUR1	0.60748	6.92124	4.93343	0.00082204	0.00601293	3.34526	stage	Time 0
		TMEM38A	0.935576	2.72883	4.65769	0.000823373	0.00601912	3.34482	stage	Time 0
		KIAA1328	0.546604	2.65381	4.42801	0.00082396	0.00601986	3.34462	stage	Time 0
		MLF2	0.504186	8.67592	4.94788	0.000825714	0.00602912	3.34403	stage	Time 0
		WDR6	-0.614798	6.35437	-4.71204	0.000826787	0.0060334	-3.34367	stage	Time 0
		RFESD	1.93453	1.64959	4.42495	0.000828376	0.00604114	3.34314	stage	Time 0
		TP53I11	-1.0959	5.40205	-4.83532	0.000828822	0.00604114	-3.34299	stage	Time 0
		DMAC1	-0.531814	7.36078	-4.70723	0.000829462	0.00604225	-3.34277	stage	Time 0
		ZCCHC8	0.60996	4.22811	4.69854	0.000832359	0.00605979	3.3418	stage	Time 0
		LRIF1	-0.677109	5.1458	-7.21201	0.000836028	0.00608293	-3.34058	stage	Time 0
		DCTN4	-0.543946	4.46516	-4.74969	0.000839165	0.00610217	-3.33954	stage	Time 0
		CHRM3	1.28939	0.883727	4.41583	0.000841719	0.00611478	3.3387	stage	Time 0
		SUFU	-0.658556	2.05809	-4.41571	0.000841886	0.00611478	-3.33864	stage	Time 0
		ERN1	1.01879	2.36405	4.64166	0.000842793	0.00611778	3.33834	stage	Time 0
		ELF3	1.7993	2.60179	4.54348	0.000843864	0.00612196	3.33799	stage	Time 0
		ADPRH	-1.39996	1.32329	-5.25182	0.000844701	0.00612446	-3.33772	stage	Time 0
		USP18	2.11119	3.02574	4.52888	0.000846415	0.00613329	3.33715	stage	Time 0
		SELENOM	1.00638	5.41468	4.88425	0.000848426	0.00614427	3.33649	stage	Time 0
		SCAF4	-0.578264	5.17688	-4.65596	0.000849002	0.00614485	-3.3363	stage	Time 0
		PAK2	0.381035	6.50721	4.40967	0.000850849	0.00615462	3.3357	stage	Time 0
		MRNIP	-0.990522	4.54043	-4.72649	0.00085195	0.00615899	-3.33534	stage	Time 0
		ERVK3-1	-1.54939	4.71375	-4.6985	0.000854458	0.00617352	-3.33452	stage	Time 0
		IGSF1	-1.09495	3.86922	-4.40592	0.000856457	0.00618436	-3.33387	stage	Time 0
		ASPH	-0.459984	5.66695	-4.40539	0.000857256	0.00618652	-3.33361	stage	Time 0
		CC2D1B	-0.727587	3.03336	-4.61861	0.000859802	0.00620129	-3.33279	stage	Time 0
		SPIB	-1.49154	3.97795	-4.40124	0.000863516	0.00622445	-3.33159	stage	Time 0
		HLA-C	-1.58319	6.57882	-4.68159	0.000865426	0.00623033	-3.33097	stage	Time 0
		TASP1	-0.447377	3.91361	-4.71035	0.000866114	0.00623033	-3.33075	stage	Time 0
		CCDC124	0.995603	6.71797	4.66607	0.000866211	0.00623033	3.33072	stage	Time 0
		CLN8	1.06925	5.19024	5.0353	0.000866343	0.00623033	3.33068	stage	Time 0
		BRI3BP	-0.985819	5.51332	-5.35635	0.000867107	0.0062322	-3.33043	stage	Time 0
		RWDD2B	1.60947	3.53261	4.64146	0.000868964	0.00624193	3.32984	stage	Time 0
		MYO1E	0.660087	4.32318	4.67654	0.000869962	0.0062436	3.32952	stage	Time 0
		TMEM238	1.02412	4.85125	4.39684	0.000870204	0.0062436	3.32944	stage	Time 0
		CCDC102B	-0.870236	1.46041	-4.51906	0.000876996	0.00628869	-3.32728	stage	Time 0
		ZNF446	-0.759231	2.49783	-4.39037	0.000880135	0.00630755	-3.32628	stage	Time 0
		ANGEL1	-0.889707	3.75485	-4.38985	0.000880935	0.00630963	-3.32603	stage	Time 0
		NOL4L	1.17239	3.92461	4.98199	0.000882012	0.0063137	3.32569	stage	Time 0
		CYBRD1	-0.591472	3.40984	-4.97653	0.000882537	0.00631381	-3.32552	stage	Time 0
		PDGFB	1.66799	2.042	4.38757	0.000884475	0.00632402	3.32491	stage	Time 0
		TTC12	-1.24434	1.75167	-4.82626	0.000888106	0.00634632	-3.32377	stage	Time 0
		HNRNPL	-0.695182	6.42967	-4.38477	0.000888822	0.00634643	-3.32354	stage	Time 0
		ZNF331	0.83634	4.15963	4.72823	0.000889146	0.00634643	3.32344	stage	Time 0
		CKAP5	-0.619572	6.4649	-4.76911	0.000890803	0.0063546	-3.32292	stage	Time 0
		ZNF18	-0.540294	3.28071	-4.38252	0.000892347	0.0063585	-3.32244	stage	Time 0
		REL	-0.545962	3.89817	-4.3825	0.000892376	0.0063585	-3.32243	stage	Time 0
		EPHX1	1.4709	5.75436	4.66518	0.0008958	0.00637923	3.32136	stage	Time 0
		TMEM167A	0.421722	8.32757	4.66541	0.000897366	0.00638671	3.32087	stage	Time 0
		HELLS	-0.696877	8.16932	-4.37623	0.00090226	0.00641786	-3.31935	stage	Time 0
		ALKBH4	-0.823552	5.8976	-4.66251	0.000904751	0.00643188	-3.31858	stage	Time 0
		PRRC1	-0.454233	5.14841	-4.62188	0.000906543	0.00644092	-3.31803	stage	Time 0
		FHOD3	-1.54259	3.25081	-4.37298	0.00090742	0.00644346	-3.31776	stage	Time 0
		NAGPA	0.806112	3.59021	4.7148	0.000908364	0.00644647	3.31747	stage	Time 0
		LRRC32	-1.09201	0.0286991	-4.37101	0.000910575	0.00645847	-3.31679	stage	Time 0
		TUBGCP4	0.389018	4.26664	4.37022	0.00091184	0.00646373	3.3164	stage	Time 0
		TMUB1	0.492461	6.04238	4.65445	0.00091333	0.0064706	3.31595	stage	Time 0
		XRCC3	0.776022	3.67077	4.36895	0.000913868	0.00647071	3.31578	stage	Time 0
		ZNF444	0.380216	5.51392	4.36813	0.000915189	0.00647636	3.31538	stage	Time 0
		SLC24A1	-0.916872	1.32533	-4.67463	0.000916281	0.00648039	-3.31505	stage	Time 0
		HSPA1L	-1.27504	0.221894	-4.36708	0.000916873	0.00648087	-3.31487	stage	Time 0
		PIFO	2.20779	2.91019	4.47707	0.000917759	0.00648344	3.3146	stage	Time 0
		F8	-0.962232	0.874162	-4.36521	0.000919906	0.00649436	-3.31394	stage	Time 0
		RMI2	-1.03975	6.93408	-4.36493	0.000920353	0.00649436	-3.31381	stage	Time 0
		ARFGEF1	0.350023	5.91199	4.36331	0.000922979	0.00650918	3.31301	stage	Time 0
		PPP6R2	0.399723	4.21035	4.36242	0.000924429	0.00651322	3.31257	stage	Time 0
		PPP1R18	-0.836732	4.66033	-4.50402	0.000925368	0.00651322	-3.31229	stage	Time 0
		GRPEL1	-0.801567	7.41881	-4.88389	0.000925378	0.00651322	-3.31228	stage	Time 0
		IL27RA	0.79945	3.12055	4.50388	0.000925655	0.00651322	3.3122	stage	Time 0
		UMAD1	0.640634	3.52264	4.65408	0.000928442	0.00652913	3.31136	stage	Time 0
		SYNGR2	1.29942	4.01671	4.64328	0.000930425	0.00653686	3.31076	stage	Time 0
		WDR90	-0.73989	3.62328	-4.35863	0.000930597	0.00653686	-3.31071	stage	Time 0
		OCRL	-0.999452	3.47945	-5.38558	0.000931675	0.00654073	-3.31039	stage	Time 0
		RANBP2	-0.851795	6.07445	-4.64821	0.000933712	0.00655132	-3.30977	stage	Time 0
		YY2	1.26759	0.372388	4.7991	0.000934331	0.00655195	3.30959	stage	Time 0
		CLDN7	1.41453	7.51784	4.35493	0.000936676	0.00656468	3.30889	stage	Time 0
		TIPARP	-1.03248	2.35807	-4.55536	0.000937908	0.00656923	-3.30852	stage	Time 0
		SLFN12	2.32217	2.84525	4.46071	0.000938386	0.00656923	3.30838	stage	Time 0
		ACER3	-0.424972	4.55936	-4.62725	0.000939835	0.00657566	-3.30794	stage	Time 0
		PSEN1	-0.488775	4.36701	-4.63391	0.000941194	0.00658145	-3.30754	stage	Time 0
		H4C5	-2.04736	1.33619	-5.13816	0.000942779	0.00658882	-3.30707	stage	Time 0
		FBXO42	-0.22982	3.97839	-4.35085	0.000943428	0.00658964	-3.30688	stage	Time 0
		ZSWIM3	0.622013	1.46122	4.35046	0.000944069	0.0065904	3.30669	stage	Time 0
		WDR76	-0.906887	3.97126	-4.35011	0.000944662	0.00659083	-3.30651	stage	Time 0
		MAFB	2.72772	1.31239	4.53689	0.000945648	0.00659399	3.30622	stage	Time 0
		GPRC5B	-0.697838	5.35744	-4.55475	0.000947122	0.00660056	-3.30578	stage	Time 0
		POLH	1.6473	2.23562	4.3833	0.000953304	0.0066399	3.30396	stage	Time 0
		SKIV2L	-0.520515	3.72218	-4.70679	0.000955217	0.00664949	-3.3034	stage	Time 0
		KCNK6	1.70573	3.33799	4.45498	0.000959548	0.00667589	3.30213	stage	Time 0
		PDE3B	-0.758692	3.59741	-4.73345	0.000966829	0.00672277	-3.30001	stage	Time 0
		ISY1	-0.69799	5.06054	-4.66281	0.000967882	0.00672632	-3.2997	stage	Time 0
		TGOLN2	0.680824	5.54662	4.6467	0.000970538	0.00673606	3.29893	stage	Time 0
		BCLAF1	-0.524945	7.82576	-4.33436	0.000971215	0.00673606	-3.29874	stage	Time 0
		MCTP2	1.31767	0.0213644	5.52157	0.000971451	0.00673606	3.29867	stage	Time 0
		ADORA2B	1.16072	1.64953	4.33405	0.000971755	0.00673606	3.29858	stage	Time 0
		PLXNB2	-0.676834	4.81361	-4.33359	0.000972538	0.00673606	-3.29835	stage	Time 0
		PDE6B	-0.918876	1.79605	-4.33358	0.000972546	0.00673606	-3.29835	stage	Time 0
		MICOS13	-0.623405	6.90243	-4.48836	0.000976085	0.00675403	-3.29733	stage	Time 0
		LAP3	-0.868356	6.48898	-4.70058	0.000976976	0.00675403	-3.29707	stage	Time 0
		VRK3	-0.529694	4.76257	-4.53344	0.000977007	0.00675403	-3.29707	stage	Time 0
		HUS1	1.22638	4.14917	5.13251	0.00097732	0.00675403	3.29698	stage	Time 0
		SLC43A3	0.6699	3.7318	4.33043	0.000977973	0.00675477	3.29679	stage	Time 0
		TMEM30A	0.801032	4.39092	4.32991	0.000978871	0.00675721	3.29653	stage	Time 0
		ANKRD28	-0.768199	4.86035	-4.49782	0.000979577	0.00675749	-3.29633	stage	Time 0
		TRPC4AP	0.442174	5.01073	4.75958	0.000980003	0.00675749	3.29621	stage	Time 0
		SGMS1	1.03588	2.98645	4.50002	0.000984305	0.00678282	3.29497	stage	Time 0
		PLCXD2	-1.16382	0.243581	-4.80047	0.00098477	0.00678282	-3.29484	stage	Time 0
		SOCS3	1.06736	4.04113	4.32544	0.000986608	0.0067917	3.29432	stage	Time 0
		FTCD	-2.0638	0.113793	-4.32347	0.000990038	0.00681153	-3.29334	stage	Time 0
		CYP27A1	1.63242	1.57874	4.32053	0.000995175	0.00684307	3.29189	stage	Time 0
		ARRDC1	0.755577	4.03958	4.31979	0.000996476	0.00684728	3.29152	stage	Time 0
		TRNT1	-0.444611	5.83711	-4.31956	0.000996892	0.00684728	-3.2914	stage	Time 0
		GLS2	1.40497	2.66803	4.36979	0.00100296	0.00688517	3.28969	stage	Time 0
		METTL5	0.696	7.79439	4.58085	0.001007	0.00690902	3.28856	stage	Time 0
		POLQ	-0.389548	3.95115	-4.313	0.00100848	0.00691208	-3.28815	stage	Time 0
		ZNF423	-0.724763	4.77438	-4.31296	0.00100856	0.00691208	-3.28813	stage	Time 0
		PINX1	0.73768	5.62868	4.3126	0.00100919	0.0069126	3.28795	stage	Time 0
		TOR1B	0.613632	3.06775	4.57183	0.00101005	0.00691464	3.28771	stage	Time 0
		PSMD5	-0.853135	4.98094	-4.5144	0.00101139	0.00692	-3.28734	stage	Time 0
		DNAJC16	-0.465379	3.94955	-4.47095	0.00101231	0.00692245	-3.28708	stage	Time 0
		RWDD2A	0.59449	2.85747	4.30903	0.00101558	0.00693464	3.28618	stage	Time 0
		SEC22C	0.42466	5.42	4.30897	0.00101569	0.00693464	3.28614	stage	Time 0
		NSUN6	0.905264	3.21031	4.30892	0.00101577	0.00693464	3.28612	stage	Time 0
		ZNF691	0.641746	3.86998	4.73052	0.00101807	0.00694655	3.28548	stage	Time 0
		ATP6V1G1	0.821527	9.33661	4.55457	0.00101909	0.00694967	3.2852	stage	Time 0
		NOP10	0.50766	9.04201	4.61706	0.00102044	0.00695314	3.28483	stage	Time 0
		OSGIN2	-1.46573	5.1091	-4.64481	0.00102072	0.00695314	-3.28475	stage	Time 0
		COL9A1	-1.83997	3.83447	-4.30549	0.00102195	0.00695767	-3.28441	stage	Time 0
		ZNF607	-0.479014	3.02558	-4.5747	0.00102423	0.00696936	-3.28379	stage	Time 0
		ZNF574	0.39921	4.29003	4.30387	0.00102486	0.00696983	3.28361	stage	Time 0
		STMND1	-4.54798	0.634875	-4.57521	0.00102609	0.00697441	-3.28327	stage	Time 0
		LYRM1	0.831409	4.82267	4.50001	0.00102691	0.00697613	3.28305	stage	Time 0
		FGFR1	-0.796204	7.78673	-4.57301	0.00103177	0.00700526	-3.28172	stage	Time 0
		HSPA14	-0.582719	6.39773	-4.56238	0.00103852	0.00704345	-3.27988	stage	Time 0
		RRBP1	-0.986103	7.11941	-4.80425	0.00103853	0.00704345	-3.27988	stage	Time 0
		PPP1R12C	-0.675213	4.65098	-4.70477	0.00104231	0.00706521	-3.27885	stage	Time 0
		PRPF4	0.470699	5.80877	4.2928	0.00104509	0.0070764	3.2781	stage	Time 0
		PILRB	-0.797241	4.62468	-4.53483	0.0010451	0.0070764	-3.2781	stage	Time 0
		NDRG2	-0.976689	3.32158	-4.29191	0.00104674	0.00708367	-3.27765	stage	Time 0
		TMC6	1.49588	4.0685	4.57256	0.00104894	0.00709467	3.27706	stage	Time 0
		NFRKB	-0.639877	4.46193	-4.28827	0.0010535	0.00712162	-3.27584	stage	Time 0
		CEP44	-0.635114	4.03596	-4.4724	0.00105789	0.00714741	-3.27466	stage	Time 0
		CHM	-0.414197	4.48837	-4.2856	0.00105848	0.0071475	-3.2745	stage	Time 0
		CADPS2	-1.26362	4.75361	-4.55411	0.00106006	0.00715428	-3.27408	stage	Time 0
		CIAO2B	0.585814	7.89905	4.57469	0.00106316	0.00717125	3.27326	stage	Time 0
		PGBD1	0.784676	3.44177	4.56549	0.00106511	0.0071805	3.27274	stage	Time 0
		SOX12	-0.839397	5.29225	-4.59284	0.0010668	0.00718802	-3.27229	stage	Time 0
		SEMA3A	-1.03774	5.03697	-4.5275	0.00106746	0.00718853	-3.27212	stage	Time 0
		LAMA3	2.85835	0.133375	4.4802	0.00106942	0.00719781	3.2716	stage	Time 0
		EPDR1	1.11662	2.90217	4.54258	0.00107141	0.00720732	3.27107	stage	Time 0
		GFM2	-0.633981	4.40408	-4.60296	0.00107514	0.00722535	-3.27009	stage	Time 0
		CERCAM	1.96184	0.0798301	4.56668	0.00107526	0.00722535	3.27006	stage	Time 0
		KCNK17	1.68567	0.857767	4.40858	0.00107887	0.00724566	3.26911	stage	Time 0
		LXN	1.1686	3.18369	4.54071	0.00108171	0.00726078	3.26837	stage	Time 0
		DBF4B	1.01119	2.78581	4.56625	0.00108251	0.00726225	3.26816	stage	Time 0
		STAT3	-0.643727	6.14937	-4.55654	0.00108785	0.00729109	-3.26676	stage	Time 0
		PLA2G3	-1.76385	4.69013	-4.27005	0.00108799	0.00729109	-3.26673	stage	Time 0
		PDE6G	1.60394	0.344006	4.50757	0.0010927	0.0073187	3.2655	stage	Time 0
		TWF1	0.572793	4.30104	4.50291	0.00109554	0.00733377	3.26477	stage	Time 0
		RNASEH2B	-0.601859	6.80491	-4.26577	0.00109627	0.0073346	-3.26458	stage	Time 0
		GULP1	0.672908	6.81894	4.5246	0.00109692	0.0073346	3.26441	stage	Time 0
		MSL2	-0.685205	3.59296	-4.53572	0.00109744	0.0073346	-3.26428	stage	Time 0
		AL513165.2	1.00046	0.858139	4.46649	0.00109977	0.0073462	3.26368	stage	Time 0
		TCEA1	1.2207	8.01675	4.52342	0.00110157	0.0073543	3.26321	stage	Time 0
		INTS8	-0.864715	4.57	-4.6386	0.00110224	0.00735478	-3.26304	stage	Time 0
		ADAMTS7	-0.965663	4.16338	-4.26067	0.00110621	0.00737729	-3.26202	stage	Time 0
		CDK5RAP1	0.708997	5.26708	4.52234	0.00110724	0.00738021	3.26176	stage	Time 0
		RGS10	1.42978	4.64628	5.32029	0.00110784	0.00738021	3.2616	stage	Time 0
		NRK	3.36178	0.361705	4.52182	0.00110917	0.00738516	3.26126	stage	Time 0
		NOX4	2.36282	0.153311	4.5097	0.00111043	0.00738954	3.26094	stage	Time 0
		CERS1	0.822011	4.03433	4.49193	0.00111347	0.00740427	3.26017	stage	Time 0
		CDC14B	-1.20437	5.06895	-4.49926	0.00111425	0.00740427	-3.25997	stage	Time 0
		MAGOH	0.626247	7.73377	4.53377	0.00111443	0.00740427	3.25992	stage	Time 0
		ZNF721	1.56451	2.19562	4.55206	0.00111591	0.00741008	3.25955	stage	Time 0
		TMEM205	-0.666892	6.99015	-4.4699	0.00111841	0.00742274	-3.25891	stage	Time 0
		AOX1	-1.17585	1.02544	-4.46284	0.00111944	0.0074256	-3.25865	stage	Time 0
		PITRM1	-1.2366	1.48683	-4.37708	0.00112032	0.00742745	-3.25843	stage	Time 0
		FAM228B	1.68216	0.542803	4.38623	0.00112293	0.00744075	3.25777	stage	Time 0
		SMIM15	-0.379366	6.72923	-4.36537	0.00112532	0.00745263	-3.25716	stage	Time 0
		POLA2	-0.666047	5.1554	-4.25061	0.00112609	0.00745371	-3.25697	stage	Time 0
		TPM1	1.16442	9.82735	4.2501	0.0011271	0.00745641	3.25671	stage	Time 0
		MICALL2	-0.680956	1.76602	-4.246	0.00113532	0.00750678	-3.25465	stage	Time 0
		NAA16	-0.599501	4.84235	-5.40599	0.00113747	0.00751698	-3.25411	stage	Time 0
		ACSL3	-0.606981	6.83688	-4.24301	0.00114135	0.00753863	-3.25315	stage	Time 0
		SRP19	0.436904	7.67318	4.47978	0.00114267	0.00753985	3.25282	stage	Time 0
		NUFIP1	-0.613341	5.7968	-4.24232	0.00114275	0.00753985	-3.2528	stage	Time 0
		MFN1	-0.519552	4.62458	-4.2417	0.00114401	0.00754414	-3.25248	stage	Time 0
		OCIAD2	2.19774	7.78561	4.49784	0.00115068	0.00758411	3.25083	stage	Time 0
		CAP1	0.614572	7.73377	4.23346	0.00116084	0.007647	3.24833	stage	Time 0
		TTI2	0.442057	4.23674	4.48816	0.00116315	0.0076581	3.24777	stage	Time 0
		MDM1	-0.603437	3.23457	-4.43132	0.0011673	0.00767828	-3.24675	stage	Time 0
		PGF	1.33055	2.24734	4.3576	0.00116745	0.00767828	3.24672	stage	Time 0
		GNPDA1	1.04366	6.10125	4.48778	0.00116927	0.00768102	3.24627	stage	Time 0
		SUCLG2	-0.945747	5.5951	-4.22937	0.00116929	0.00768102	-3.24627	stage	Time 0
		RACGAP1	-0.806732	5.21056	-4.68762	0.00116973	0.00768102	-3.24616	stage	Time 0
		SIN3A	-0.578505	5.53018	-4.52541	0.001172	0.00769187	-3.24561	stage	Time 0
		CEP63	-0.533087	5.13837	-4.43962	0.00117274	0.00769262	-3.24543	stage	Time 0
		TMEM179	-2.09295	0.397219	-4.49117	0.00117992	0.00773567	-3.24369	stage	Time 0
		ZNF646	-0.508611	3.25016	-4.47425	0.0011849	0.00776284	-3.24249	stage	Time 0
		TRPV2	-1.59161	0.524295	-4.37223	0.00118532	0.00776284	-3.24239	stage	Time 0
		ESCO1	0.353512	5.37335	4.22134	0.00118608	0.0077637	3.24221	stage	Time 0
		B4GALNT3	1.03456	1.32756	4.44201	0.00120031	0.00785272	3.23881	stage	Time 0
		FOXH1	0.86137	7.1955	4.49924	0.00120179	0.00785825	3.23845	stage	Time 0
		ALG2	0.83116	4.80653	4.45941	0.00120411	0.00786895	3.23791	stage	Time 0
		THAP5	0.529004	4.19996	4.21257	0.0012047	0.00786895	3.23777	stage	Time 0
		MGRN1	-0.563548	4.71735	-4.54225	0.00120555	0.00787036	-3.23756	stage	Time 0
		SLC16A12	-2.1884	2.33429	-4.21142	0.00120716	0.00787296	-3.23718	stage	Time 0
		ITGA1	0.78553	1.57086	4.70516	0.00120741	0.00787296	3.23712	stage	Time 0
		NBEAL2	-0.521396	3.85501	-4.2111	0.00120785	0.00787296	-3.23702	stage	Time 0
		MATN4	-2.02557	1.87764	-4.47968	0.00121362	0.00790639	-3.23566	stage	Time 0
		ISG20	2.44362	1.87215	4.36152	0.00121663	0.00792182	3.23495	stage	Time 0
		NCAM1	-1.16973	2.4311	-4.20628	0.00121822	0.00792805	-3.23458	stage	Time 0
		GDI1	0.474146	5.04716	4.47023	0.0012274	0.00798357	3.23244	stage	Time 0
		OPTC	-2.27676	1.14059	-4.19954	0.00123291	0.00801518	-3.23116	stage	Time 0
		UNC119B	-0.715932	4.79769	-4.58485	0.001234	0.00801811	-3.2309	stage	Time 0
		ZCCHC18	-1.25914	1.94082	-4.19808	0.00123611	0.00802447	-3.23041	stage	Time 0
		ZMYND8	-0.66338	7.39267	-4.42598	0.00123654	0.00802447	-3.23032	stage	Time 0
		COQ6	-0.69548	3.41771	-4.53283	0.0012373	0.00802447	-3.23014	stage	Time 0
		CA9	-1.70524	0.0831258	-4.81262	0.00123757	0.00802447	-3.23008	stage	Time 0
		SLC15A3	-1.62064	4.13014	-4.99178	0.00124026	0.00803772	-3.22945	stage	Time 0
		ORMDL1	0.799342	7.26967	4.49093	0.00124475	0.00805935	3.22842	stage	Time 0
		TPK1	-0.592598	2.23796	-4.19409	0.0012449	0.00805935	-3.22839	stage	Time 0
		ZNF91	-0.372582	4.9963	-4.30997	0.00124599	0.00806218	-3.22814	stage	Time 0
		PAPOLG	-0.487875	3.78913	-4.64449	0.00124845	0.00807385	-3.22757	stage	Time 0
		NUP98	-0.445387	4.97082	-4.19	0.001254	0.00810554	-3.2263	stage	Time 0
		CA8	-1.68155	3.38123	-4.23643	0.00125913	0.00813313	-3.22514	stage	Time 0
		NFE2L2	0.860699	5.3461	4.43242	0.00125958	0.00813313	3.22503	stage	Time 0
		ITGA3	2.01547	2.51098	4.33499	0.00126179	0.00814314	3.22453	stage	Time 0
		SLC16A13	-0.717045	0.827618	-4.18355	0.00126847	0.00817932	-3.22302	stage	Time 0
		CCNDBP1	1.51879	4.68971	4.44014	0.00126871	0.00817932	3.22296	stage	Time 0
		AQP3	-1.21456	2.67727	-4.39917	0.00127158	0.0081935	-3.22232	stage	Time 0
		OGT	-0.588458	5.02678	-4.18108	0.00127407	0.0082053	-3.22176	stage	Time 0
		CPT2	-0.516775	4.96135	-4.18028	0.00127587	0.00821262	-3.22135	stage	Time 0
		KHNYN	-0.545428	3.14947	-4.17436	0.00128939	0.00829356	-3.21833	stage	Time 0
		MYBBP1A	-0.663343	5.81817	-4.17419	0.00128978	0.00829356	-3.21824	stage	Time 0
		DUSP23	0.952576	6.79711	4.4143	0.00129353	0.00831332	3.21741	stage	Time 0
		MRPL37	-0.45249	7.75485	-4.59362	0.00129487	0.00831767	-3.21711	stage	Time 0
		TNFRSF10B	0.834553	5.46402	4.1709	0.00129736	0.0083293	3.21656	stage	Time 0
		ACBD4	-1.23439	1.8903	-4.16991	0.00129965	0.00833969	-3.21606	stage	Time 0
		AEBP1	-0.572867	4.36318	-4.42167	0.0013026	0.00835429	-3.21541	stage	Time 0
		FREM2	-1.58238	3.52253	-4.16787	0.00130437	0.00836134	-3.21502	stage	Time 0
		B3GNT9	1.42539	0.571852	4.16668	0.00130715	0.00837481	3.21441	stage	Time 0
		MYL6B	0.456448	8.3187	4.28485	0.00130801	0.00837602	3.21422	stage	Time 0
		MYO5C	-0.664082	4.0787	-4.50173	0.00131269	0.00840114	-3.21319	stage	Time 0
		CSPP1	-0.689412	4.50122	-4.16405	0.00131329	0.00840114	-3.21306	stage	Time 0
		LCLAT1	-0.534926	3.72367	-4.45065	0.00131604	0.00841061	-3.21246	stage	Time 0
		TTC32	-1.14638	4.23136	-4.16283	0.00131613	0.00841061	-3.21244	stage	Time 0
		RGPD5	-1.94822	0.167215	-4.41511	0.00131995	0.00842731	-3.21161	stage	Time 0
		DOCK3	0.901379	1.65666	4.41428	0.00132039	0.00842731	3.21151	stage	Time 0
		NUP153	-0.613767	5.67707	-4.40351	0.00132078	0.00842731	-3.21142	stage	Time 0
		LPCAT3	-0.571847	5.32322	-4.1603	0.00132209	0.00842888	-3.21114	stage	Time 0
		CRYBB2	-2.68132	1.37603	-4.36578	0.00132239	0.00842888	-3.21108	stage	Time 0
		MAP1B	1.54616	8.09943	4.15982	0.00132322	0.00842982	3.2109	stage	Time 0
		HNRNPA3	-0.335889	9.30338	-4.15895	0.00132526	0.0084345	-3.21045	stage	Time 0
		BDH2	0.567722	5.71551	4.41422	0.00132531	0.0084345	3.21044	stage	Time 0
		ZNF195	0.283136	6.09514	4.15615	0.00133191	0.00847213	3.20901	stage	Time 0
		MIDN	1.00563	6.99091	4.38913	0.00133426	0.00848273	3.20851	stage	Time 0
		DPAGT1	0.522785	5.0284	4.41746	0.00133931	0.00851049	3.20742	stage	Time 0
		ASPHD2	1.17788	3.26202	4.40922	0.00134031	0.00851242	3.20721	stage	Time 0
		ATP2C1	-0.687466	5.24366	-4.39388	0.00134409	0.00853207	-3.2064	stage	Time 0
		TMEM132A	-0.651385	5.45004	-4.15033	0.00134579	0.0085385	-3.20603	stage	Time 0
		ZDHHC8	0.805624	3.18834	4.14902	0.00134894	0.00855358	3.20536	stage	Time 0
		LIN52	-0.642298	3.45867	-4.42418	0.00134955	0.00855358	-3.20523	stage	Time 0
		ANKRD11	0.533074	8.00194	4.14798	0.00135145	0.00856126	3.20482	stage	Time 0
		CLNS1A	-0.602425	8.45449	-4.4362	0.00135393	0.00857261	-3.2043	stage	Time 0
		FAM126A	0.786538	4.96945	4.39658	0.00135652	0.00858459	3.20375	stage	Time 0
		H3C8	-1.70535	3.65689	-4.30137	0.00136069	0.00860659	-3.20286	stage	Time 0
		PCMTD2	-0.718844	4.40615	-4.43233	0.0013655	0.00863263	-3.20185	stage	Time 0
		GALC	0.716087	1.88479	4.14167	0.00136673	0.008636	3.20159	stage	Time 0
		CLASP1	-0.558703	4.3961	-4.33239	0.00137034	0.00865436	-3.20083	stage	Time 0
		FNDC11	-1.55533	0.698114	-4.36994	0.00137453	0.0086764	-3.19995	stage	Time 0
		TRIM27	-0.341296	6.50893	-4.13757	0.00137677	0.00868614	-3.19948	stage	Time 0
		KDM3A	-0.827377	3.87126	-4.13665	0.00137905	0.00869567	-3.199	stage	Time 0
		RNASEK	0.875552	2.14035	4.13639	0.00137969	0.00869567	3.19887	stage	Time 0
		BAG1	0.746022	6.94753	4.13565	0.0013815	0.00870267	3.19849	stage	Time 0
		SPR	1.17688	2.23791	4.41478	0.00138332	0.00870627	3.19811	stage	Time 0
		PLCD3	1.22047	2.83765	4.30931	0.00138418	0.00870627	3.19793	stage	Time 0
		EPHX2	-1.32287	3.69142	-4.13457	0.00138418	0.00870627	-3.19793	stage	Time 0
		ZDHHC17	-0.532463	4.11094	-4.40733	0.00138954	0.00873559	-3.19681	stage	Time 0
		RAD52	-0.848923	2.51548	-5.21898	0.00139132	0.00874232	-3.19645	stage	Time 0
		HSPA14.1	0.597172	3.5425	4.13045	0.00139439	0.0087546	3.19581	stage	Time 0
		PPP1R17	-2.47648	3.75004	-4.18409	0.00139469	0.0087546	-3.19575	stage	Time 0
		FSIP2	1.66114	0.573683	4.12995	0.00139564	0.00875614	3.19555	stage	Time 0
		PTGIS	1.25347	2.99583	4.4277	0.00140554	0.00881377	3.19351	stage	Time 0
		ZNF658	0.75929	1.44628	4.12543	0.00140695	0.00881394	3.19322	stage	Time 0
		MARCHF8	0.489734	2.30723	4.12541	0.00140699	0.00881394	3.19321	stage	Time 0
		CHFR	0.90514	4.0114	4.3726	0.00141024	0.00882983	3.19255	stage	Time 0
		SLC45A4	-0.77262	3.00198	-4.12351	0.00141177	0.00883476	-3.19223	stage	Time 0
		C8orf44	-0.811162	1.70329	-4.12324	0.00141245	0.00883476	-3.19209	stage	Time 0
		RGL3	1.32413	2.74892	4.12216	0.00141518	0.00884671	3.19154	stage	Time 0
		GAS1	-1.78662	2.51302	-4.33259	0.00141623	0.00884671	-3.19132	stage	Time 0
		WDR89	-0.580244	4.90527	-4.38114	0.0014165	0.00884671	-3.19127	stage	Time 0
		THEM4	-0.831753	5.00403	-4.37992	0.00141777	0.00884737	-3.19101	stage	Time 0
		ZNF594	0.984341	2.32076	4.32854	0.00141803	0.00884737	3.19095	stage	Time 0
		MTA2	-1.66237	4.4912	-4.35044	0.00142155	0.00886486	-3.19024	stage	Time 0
		POGLUT1	-0.688033	4.66395	-4.11866	0.00142407	0.00887514	-3.18973	stage	Time 0
		LMO2	-1.15565	2.53471	-4.11843	0.00142464	0.00887514	-3.18961	stage	Time 0
		ANKRD46	-0.904316	4.50935	-4.37594	0.00142928	0.00889958	-3.18867	stage	Time 0
		SPACA9	0.957169	0.421198	4.11594	0.00143101	0.00890588	3.18832	stage	Time 0
		CAST	0.766393	5.10386	4.37248	0.0014337	0.00891813	3.18778	stage	Time 0
		GLB1L3	3.36057	1.53302	4.20818	0.00143779	0.00893909	3.18696	stage	Time 0
		GIN1	-0.620525	3.44423	-4.11262	0.00143952	0.0089454	-3.18661	stage	Time 0
		MAPK9	0.330733	5.18127	4.29979	0.00144149	0.00895312	3.18621	stage	Time 0
		C22orf15	-2.72973	1.90536	-4.42234	0.0014434	0.00896049	-3.18583	stage	Time 0
		IGFBPL1	-1.03904	5.52681	-4.48224	0.00144701	0.00897841	-3.18511	stage	Time 0
		PPA2	0.943739	5.46527	4.34207	0.00144844	0.0089828	3.18482	stage	Time 0
		ZNF7	0.723257	4.25963	4.42916	0.00145215	0.00900128	3.18408	stage	Time 0
[truncated: 11,761 more rows]
